# Supplementary material for: Differences in Whole-Blood Transcriptional Profiles in Inflammatory Bowel Disease Patients Responding to Vedolizumab Compared with Non-Responders
Source: MDPI journal article supplement (doi:10.3390/ijms24065820), 2023-03-18
Supplement: s1 [file s1]

**Supplementary Table S1.** Description of patients included in RNA-sequencing with paired RNA samples representing baseline (T0) and follow-up (T1), n = 20 (7 UC, 13 CD).

|                                                           |                       | Responders (n = 9) | P-value T0-T1 | Non-responders (n = 11) | P-value T0-T1 | P-value at T0 or T1 |
|-----------------------------------------------------------|-----------------------|--------------------|---------------|-------------------------|---------------|---------------------|
| Disease UC/CD                                             |                       | 4 / 5              |               | 3 / 8                   |               | 0.64                |
| Gender (female/male)                                      |                       | 3 / 6              |               | 3 / 8                   |               | 1.00                |
| Age (years)                                               |                       | 31.6 (16.6)        |               | 37.6 (30.2)             |               | 0.26                |
| Disease duration (years)                                  |                       | 9.6 (11.5)         |               | 16.3 (15.2)             |               | 0.26                |
| Days since last anti-TNF- $\alpha$ drug <sup>†</sup>      |                       | 204 (1578)         |               | 99 (763)                |               | 0.60                |
| Duration last anti-TNF- $\alpha$ drug (days) <sup>†</sup> |                       | 243 (324)          |               | 267 (903)               |               | 0.31                |
| Smoker (yes/no)                                           |                       | 9 / 0              |               | 9 / 2                   |               | 0.48                |
| 5ASA (T0/T1)                                              |                       | 5 / 5              |               | 2 / 2                   |               | 1.00                |
| Corticosteroids (T0/T1)                                   |                       | 7 / 4              |               | 9 / 5                   |               | 1.00                |
| Thiopurines (T0/T1)                                       |                       | 2 / 1              |               | 1 / 1                   |               | 1.00                |
| Disease activity UC                                       | T0                    | 10 (8)             |               | 10 (5)                  |               | 0.86                |
|                                                           | T1                    | 5 (11)             | 0.07          | 8 (9)                   | 1.00          | 0.63                |
|                                                           | 6 months <sup>‡</sup> | 4 (5)              | 0.42          | 8 (15)                  | 0.79          | 0.86                |
| Disease activity CD                                       | T0                    | 9 (5)              |               | 7 (5)                   |               | 0.22                |
|                                                           | T1                    | 3 (3)              | <b>0.04</b>   | 8 (6)                   | 0.55          | 0.35                |
|                                                           | 6 months <sup>§</sup> | 6 (2)              | 0.11          | 6 (9)                   | 0.11          | 1.00                |
| Clinical remission (n)                                    | T0                    | 1                  |               | 2                       |               | 1.00                |
|                                                           | T1                    | 4                  |               | 2                       |               | 0.34                |
| Physician global assessment                               | T0                    | 2 (0)              |               | 2 (0)                   |               | 0.82                |
|                                                           | T1                    | 1 (1)              | <b>0.02</b>   | 2 (1)                   | 0.11          | 0.41                |
| f-Calprotectin (mg/kg feces)                              | T0 <sup>¶</sup>       | 979 (2267)         |               | 549.5 (877)             |               | 0.31                |
|                                                           | T1 <sup>††</sup>      | 841 (2479)         | 0.07          | 266 (269)               | 0.58          | 1.00                |
| s-CRP (mg/L)                                              | T0                    | 9.0 (30)           |               | 3.0 (5.0)               |               | 0.08                |
|                                                           | T1                    | 13.0 (16.0)        | 0.40          | 3.0 (1.0)               | 0.83          | 0.07                |
| b-Leukocyte count (x10 <sup>9</sup> /L)                   | T0                    | 9.2 (5.2)          |               | 9.2 (4.0)               |               | 0.88                |
|                                                           | T1 <sup>‡‡</sup>      | 7.5 (2.6)          | 0.21          | 7.8 (3.4)               | 0.32          | 0.60                |
| b-Hb (g/L)                                                | T0                    | 137 (25)           |               | 133 (22)                |               | 0.88                |
|                                                           | T1 <sup>§§</sup>      | 125 (42)           | 0.33          | 140 (25)                | 0.79          | 0.72                |

|                                 |    |            |      |            |      |      |
|---------------------------------|----|------------|------|------------|------|------|
| s-Alb (g/L)                     | T0 | 37 (4)     |      | 37 (6)     |      | 0.77 |
|                                 | T1 | 35 (1)     | 0.67 | 36 (4)     | 0.62 | 0.66 |
| Dose VDZ (mg/kg<br>body weight) |    | 3.8 (0.43) |      | 3.9 (1.2)  |      | 0.46 |
| p-VDZ (µg/mL)                   |    | 10.5 (9.9) |      | 16.2 (8.1) |      | 0.23 |

---

Data presented as median (IQR). UC; ulcerative colitis. CD; Crohn's disease. s; serum. p; plasma. f; fecal. Disease activity; Simple Clinical Colitis Activity Index (SCCAI) and Simplified Harvey Bradshaw index (sHBI). Clinical remission sHBI  $\leq 4$  or SCCAI  $\leq 2$ . CRP; C-reactive protein. Hb; hemoglobin. Alb; albumin. VDZ; vedolizumab. T0; baseline before vedolizumab infusion. T1; follow-up after 10 weeks with vedolizumab. <sup>†</sup>Data missing in one responder, <sup>‡</sup>Comparison with T1, data available in three responders and three non-responders still on VDZ, <sup>§</sup>comparison with T1, data available in three responders and five non-responders still on VDZ, <sup>¶</sup>data missing in three responders and one non-responder, <sup>††</sup>data missing in five responders and in one non-responder, <sup>‡‡,§§</sup>data missing in one responder.
