# Supplementary material for: Differences in Whole-Blood Transcriptional Profiles in Inflammatory Bowel Disease Patients Responding to Vedolizumab Compared with Non-Responders
Source: MDPI journal article supplement (doi:10.3390/ijms24065820), 2023-03-18
Supplement: s1 [file s1]

**Supplementary Table S2:** Mean relative cellular abundance as estimated by deconvolution analysis. Differences in relative abundances between groups were assessed using Kruskal-Wallis one-way analysis of variance by ranks. When more than 50% of samples lacked data, the cell-type was excluded from analysis.

|                                       | CD4+<br>alpha beta<br>T cell | Memory<br>B cell | Neutrophil | Natural<br>killer cell | Monocyte | B cell       | T cell | Granulocyte |
|---------------------------------------|------------------------------|------------------|------------|------------------------|----------|--------------|--------|-------------|
| <b>Responders</b>                     |                              |                  |            |                        |          |              |        |             |
| T0                                    | 0.157                        | 0.041            | 0.338      | 0.135                  | 0.236    | 0.047        | 0.159  | 0.338       |
| T1                                    | 0.179                        | 0.029            | 0.295      | 0.160                  | 0.217    | 0.034        | 0.185  | 0.295       |
| <i>P</i> -value T1 vs. T0             | 0.546                        | 0.182            | 0.505      | 0.182                  | 0.182    | <b>0.046</b> | 0.182  | 0.505       |
| <b>Nonresponders</b>                  |                              |                  |            |                        |          |              |        |             |
| T0                                    | 0.159                        | 0.033            | 0.319      | 0.158                  | 0.233    | 0.041        | 0.180  | 0.319       |
| T1                                    | 0.160                        | 0.028            | 0.330      | 0.166                  | 0.234    | 0.034        | 0.169  | 0.331       |
| <i>P</i> -value T1 vs. T0             | 0.546                        | 0.228            | 1.000      | 1.000                  | 0.546    | 0.227        | 1.000  | 1.000       |
| <i>P</i> -value 4-group<br>comparison | 0.753                        | 0.627            | 0.922      | 0.744                  | 0.962    | 0.616        | 0.578  | 0.915       |

T0; baseline before initiating vedolizumab. T1; follow up after 10-12 weeks of vedolizumab treatment

The following cells were estimated to very low relative abundance:

CD8+ alpha beta cells were detected in 4/9 responders and in 4/11 non-responders.

Naïve B-cells were detected in 1/9 responders and in 7/11 non-responders.

Plasma cells were detected in 6/9 responders and in 3/11 non-responders
