# Supplementary material for: Differences in Whole-Blood Transcriptional Profiles in Inflammatory Bowel Disease Patients Responding to Vedolizumab Compared with Non-Responders
Source: Int J Mol Sci. 2023 Mar 18;24(6):5820. doi: 10.3390/ijms24065820 (PMC10052064; doi:10.3390/ijms24065820)
Supplement: Supplementary file 1 [file ijms-24-05820-s001.zip]

Archive with 4 entries (4 files):
- Supplementary Table S1.pdf
- Supplementary Table S2.pdf
- Supplementary Table S3.xlsx
- Supplementary Table S4.xlsx
