# Supplementary material for: Differences in Whole-Blood Transcriptional Profiles in Inflammatory Bowel Disease Patients Responding to Vedolizumab Compared with Non-Responders
Source: Int J Mol Sci. 2023 Mar 18;24(6):5820. doi: 10.3390/ijms24065820 (PMC10052064; doi:10.3390/ijms24065820)
Supplement: Supplementary file 1 [file ijms-24-05820-s001.zip › Supplementary Table S3.xlsx]

## Sheet: 1 T0RNR
GeneID	Length	entrezid	name	logFC	AveExpr	t	P.Value	adj.P.Val	B		Whole blood transcriptional profiling
MARCKS	4275	4082	myristoylated alanine rich protein kinase C substrate	0.840838601651429	6.68481757725259	4.47168995124419	6.7994615238224e-05	0.546580792425161	1.32488872622377		Comparison between responders (n = 9) vs. non-responders (n = 11)
C3AR1	2145	719	complement C3a receptor 1	1.38521244265467	4.03196479977399	4.39358578351936	8.63067728446488e-05	0.546580792425161	0.714402029170716		at baseline before VDZ therapy.
LINC00862	3174	554279	long intergenic non-protein coding RNA 862	0.940853100996717	3.30864419234131	4.0519305175646	0.000241754662238946	0.546928122344551	-0.294568812277345
CLEC1A	3169	51267	C-type lectin domain family 1 member A	0.736452338310822	2.53369799853413	4.03945333171723	0.000250907346761829	0.546928122344551	-0.762664864447519
ST3GAL4	4465	6484	ST3 beta-galactoside alpha-2,3-sialyltransferase 4	0.921129011182029	4.5862815950357	4.03035298160079	0.000257795024875666	0.546928122344551	0.105902933764691
DHRS13	2944	147015	dehydrogenase/reductase 13	0.912860964014055	5.12864404691913	3.93822786643013	0.000338739526297748	0.546928122344551	-0.031883586438485
TATDN3	3788	128387	TatD DNase domain containing 3	-0.433790189851628	4.29980053652665	-3.86625114883268	0.000418697815567625	0.546928122344551	-0.386841633167836
GALNT14	4567	79623	polypeptide N-acetylgalactosaminyltransferase 14	1.85401584014674	3.35198107432364	3.80819189011285	0.000496275506081627	0.546928122344551	-0.699056752207452
MTCO3P23	289	107075182	MT-CO3 pseudogene 23	0.842410417072704	3.34823978141794	3.75000837201418	0.000587913901080851	0.546928122344551	-0.887242354276664
FTH1P16	552	2508	ferritin heavy chain 1 pseudogene 16	0.829760702962455	3.07075964938227	3.73284473669731	0.00061793927404433	0.546928122344551	-0.906317126642799
KANSL1	13928	284058	KAT8 regulatory NSL complex subunit 1	0.457481598226358	7.35936415261103	3.70042623638204	0.000678745258865119	0.546928122344551	-0.510815291795602
TECPR2	9384	9895	tectonin beta-propeller repeat containing 2	0.602661024189695	7.50413829553302	3.70000168372586	0.000679578704349897	0.546928122344551	-0.514530972016736
RNF182	4090	221687	ring finger protein 182	-2.52188588755966	5.67050143256576	-3.69365677711967	0.00069215289066715	0.546928122344551	-0.594495258657767
CASP1P2	1258	440067	caspase 1 pseudogene 2	-1.12559498866155	1.18973905484891	-3.66178060177185	0.000758800958472406	0.546928122344551	-2.27455508463298
KCTD21	4164	283219	potassium channel tetramerization domain containing 21	0.505225369546762	3.13986731386315	3.60326703900131	0.000897598123338495	0.546928122344551	-1.22825894095811
TRIM9	8945	114088	tripartite motif containing 9	1.02323250049605	1.18580863146468	3.59748538850376	0.000912570368525903	0.546928122344551	-2.19621201014678
STK35	7055	140901	serine/threonine kinase 35	0.450171708723085	4.04408277210808	3.59625425507127	0.000915789446574914	0.546928122344551	-0.958329056884474
SSH1	14537	54434	slingshot protein phosphatase 1	0.509261844248798	5.89281710040708	3.59438113371246	0.000920708132135345	0.546928122344551	-0.770011788973084
ATP13A3	11864	79572	ATPase 13A3	0.402899322263336	7.07728804746359	3.5871882736168	0.000939833539506312	0.546928122344551	-0.771197885773781
E2F1	2503	1869	E2F transcription factor 1	1.17429025187003	1.1925765976791	3.56000773774499	0.00101561688142341	0.546928122344551	-2.14495017368526
MYO10	13963	4651	myosin X	1.51883135533308	1.77620936609556	3.55360297889189	0.00103431199538739	0.546928122344551	-1.86980688262791
CHSY1	5555	22856	chondroitin sulfate synthase 1	0.581353040525509	6.90503556891534	3.53561477945588	0.00108860521876959	0.546928122344551	-0.88852847792805
PAG1	11023	55824	phosphoprotein membrane anchor with glycosphingolipid microdomains 1	0.387033589996085	8.31250882185794	3.52112730304928	0.00113431370128599	0.546928122344551	-0.938040816035827
RPL36A	3964	6173	ribosomal protein L36a	-0.676655201671794	2.55887436722138	-3.5156321440217	0.00115212889427912	0.546928122344551	-1.69064153847721
RUFY1	5911	80230	RUN and FYVE domain containing 1	0.510909401612916	7.32170570807448	3.50120710397974	0.00120018239208314	0.546928122344551	-0.967176039632884
SLC25A44	7293	9673	solute carrier family 25 member 44	0.523649585730035	5.91707870811731	3.49832187479572	0.00121002208454568	0.546928122344551	-0.98841111021562
ADM	2718	133	adrenomedullin	0.993836537521014	5.49021415448798	3.47766968055533	0.00128274876909647	0.546928122344551	-1.03933638096129
IGLV8-61	414	28774	immunoglobulin lambda variable 8-61	2.2522348055734	0.646216686358671	3.47429773693119	0.00129501444353188	0.546928122344551	-2.35906023342795
IRAK2	3483	3656	interleukin 1 receptor associated kinase 2	0.546228021923385	3.33176553125951	3.45802339565056	0.00135581216319188	0.546928122344551	-1.40796356508496
GBP3	4297	2635	guanylate binding protein 3	-0.868743593678323	5.66550905880979	-3.45666132149719	0.00136102288283736	0.546928122344551	-1.10000673582633
CCDC144B	9762	284047	coiled-coil domain containing 144B (pseudogene)	-1.09499178923129	3.89710463379527	-3.43869529768688	0.00143157519630088	0.546928122344551	-1.42948069811922
LINC00963	13171	100506190	long intergenic non-protein coding RNA 963	0.487969491382855	5.43637121958531	3.43578218473619	0.00144334014561224	0.546928122344551	-1.14344959862755
ZFYVE1	5306	53349	zinc finger FYVE-type containing 1	0.350294807399919	4.47034481369104	3.4197752901237	0.00150965640858889	0.546928122344551	-1.25916459090104
MIR3945HG	986	731424	MIR3945 host gene	0.987653277428673	2.60606288942207	3.39210543289071	0.00163122699503053	0.546928122344551	-1.76355415126126
LETMD1	6032	25875	LETM1 domain containing 1	-0.342293571742095	5.0216942198993	-3.39184564838371	0.00163241158489707	0.546928122344551	-1.2831215406303
SOCS3	2734	9021	suppressor of cytokine signaling 3	0.977905807833016	5.09947915396486	3.38854780394709	0.00164752110324274	0.546928122344551	-1.25835198046674
ZNF547	3568	284306	zinc finger protein 547	-0.857617244346781	1.46349225797445	-3.38318594438492	0.00167237305895367	0.546928122344551	-2.43588461101246
MTND3P12	328	107075160	MT-ND3 pseudogene 12	1.01412398931323	1.77024306606131	3.38163507247326	0.00167962784635201	0.546928122344551	-2.25946045557175
TBL1X	7009	6907	transducin beta like 1 X-linked	0.421930727038681	6.30924828587973	3.38069255046806	0.00168405153729966	0.546928122344551	-1.24010795111903
NDUFAF6	6406	137682	NADH:ubiquinone oxidoreductase complex assembly factor 6	-0.386338254352893	3.2844292486907	-3.34397577903334	0.00186531285289297	0.566093961268506	-1.70738439870701
UBASH3B	9011	84959	ubiquitin associated and SH3 domain containing B	0.362836874290445	5.49202631104844	3.34261496863802	0.00187237662298239	0.566093961268506	-1.35465810446297
SIRPA	5068	140885	signal regulatory protein alpha	0.639219500999491	6.18245136204459	3.34041927353293	0.00188382803324918	0.566093961268506	-1.33083680583278
CXCR2	3231	3579	C-X-C motif chemokine receptor 2	0.549975108154118	9.16363627156142	3.32609495873208	0.00196019194652394	0.566093961268506	-1.39264506335369
SPRY3	9019	10251	sprouty RTK signaling antagonist 3	0.644484601691778	2.61617421214199	3.32432950514572	0.00196980563911361	0.566093961268506	-1.85996516105112
MYD88	3989	4615	MYD88 innate immune signal transduction adaptor	0.499012515550953	6.61531653636613	3.3107584432539	0.00204522253124894	0.566093961268506	-1.39464927906857
ALPL	3007	249	alkaline phosphatase, biomineralization associated	1.35775828612818	6.59713729654223	3.30887168423856	0.00205592311845502	0.566093961268506	-1.39817196866969
GABRR2	2230	2570	gamma-aminobutyric acid type A receptor rho2 subunit	1.30726416710774	1.41042181537333	3.29131210533305	0.00215810363298379	0.581585970539844	-2.41157139387701
ATP6V1C1	5851	528	ATPase H+ transporting V1 subunit C1	0.439561118789422	6.46982189508731	3.26212314985366	0.00233874201140429	0.589130925758249	-1.50307555715394
ST6GALNAC4	2630	27090	ST6 N-acetylgalactosaminide alpha-2,6-sialyltransferase 4	1.05162867582012	2.69357046844474	3.2584426058086	0.0023625157571644	0.589130925758249	-1.86440620315154
LINC01270	3014	284751	long intergenic non-protein coding RNA 1270	0.791423286507218	3.2248178210252	3.25228652382261	0.00240279453112483	0.589130925758249	-1.83753724633383
RNF24	7668	11237	ring finger protein 24	0.577695953720792	7.37584107781015	3.23657875745612	0.00250855016294968	0.589130925758249	-1.55581979057929
HCAR3	2137	8843	hydroxycarboxylic acid receptor 3	0.560751738292461	6.07234315111543	3.23103799957422	0.00254689926980875	0.589130925758249	-1.57720079943539
VWDE	6490	221806	von Willebrand factor D and EGF domains	-2.10092236490107	1.01767028805123	-3.229106363255	0.00256039917468205	0.589130925758249	-2.91820819525326
FOSL2	7157	2355	FOS like 2, AP-1 transcription factor subunit	0.625533126121236	7.0197316066462	3.22044800386345	0.00262175111239763	0.589130925758249	-1.5893773015735
CYSTM1	2185	84418	cysteine rich transmembrane module containing 1	0.995204497116002	5.11668175414114	3.21183330755922	0.00268417819636315	0.589130925758249	-1.63854666137736
VSIG10	8350	54621	V-set and immunoglobulin domain containing 10	-1.56728160008971	1.87505740218801	-3.2117508555425	0.00268478245758386	0.589130925758249	-2.453871309062
NFKBIZ	5902	64332	NFKB inhibitor zeta	0.476010385945268	7.5210445295521	3.2106475060732	0.00269288095210928	0.589130925758249	-1.61363634479676
SIGLEC9	2539	27180	sialic acid binding Ig like lectin 9	0.577530680159153	5.80688491034816	3.20998681256873	0.00269774148855033	0.589130925758249	-1.6215542438345
ITGAX	7074	3687	integrin subunit alpha X	0.627077323297911	8.41766191544873	3.19947934501943	0.00277617073243335	0.58927240555933	-1.6495820591436
MSNP1	1732	4479	moesin pseudogene 1	0.461595611338462	4.07868272238387	3.19746684518525	0.00279143725987366	0.58927240555933	-1.76563686100814
PPP1R3B	5776	79660	protein phosphatase 1 regulatory subunit 3B	0.639260064923948	8.05493631251642	3.18597582405775	0.00288014423055085	0.594591719579283	-1.6725159720651
FTH1P5	545	2509	ferritin heavy chain 1 pseudogene 5	0.655741171669211	4.65420637136571	3.1821176517317	0.00291052318126603	0.594591719579283	-1.7300283804607
ZNF132	3404	7691	zinc finger protein 132	-0.852497450099172	2.41783888604608	-3.17542544558549	0.00296393921960468	0.595892923103379	-2.31379844681378
LONRF3	4041	79836	LON peptidase N-terminal domain and ring finger 3	0.819711674349303	3.19400199301026	3.16435262535952	0.0030543674968553	0.600754660972046	-2.01013243834906
FTH1P12	551	2504	ferritin heavy chain 1 pseudogene 12	0.908952077849039	0.781427309045322	3.14817650408282	0.00319118543928635	0.600754660972046	-2.92853943130104
LINC00654	6294	149837	long intergenic non-protein coding RNA 654	0.957707155446899	1.88299391471957	3.13652918139167	0.00329327213473741	0.600754660972046	-2.40183507689123
HRH2	5679	3274	histamine receptor H2	0.773047436688142	6.67068793126691	3.13427261919366	0.00331340477648225	0.600754660972046	-1.77648831648455
PROK2	1612	60675	prokineticin 2	0.915480023233435	7.45208304274076	3.12995228316047	0.00335227553155076	0.600754660972046	-1.78836326808594
KCNQ1OT1	91667	10984	KCNQ1 opposite strand/antisense transcript 1	0.556814819585478	4.4360935889156	3.12882631900388	0.00336247668709922	0.600754660972046	-1.87451221278885
SLC2A3P4	1471	399495	solute carrier family 2 member 3 pseudogene 4	0.950251606720123	1.7468472599472	3.12349629079414	0.00341116633516389	0.600754660972046	-2.51529022558741
QRSL1	5453	55278	glutaminyl-tRNA amidotransferase subunit QRSL1	-0.517528169120796	4.24323433826601	-3.11622881274796	0.00347863025636225	0.600754660972046	-1.93621605498658
MFSD9	4367	84804	major facilitator superfamily domain containing 9	0.844599009122272	4.49734590968013	3.11041588230599	0.00353349806761609	0.600754660972046	-1.90188338749361
HPS3	6256	84343	HPS3 biogenesis of lysosomal organelles complex 2 subunit 1	-0.2483194345234	6.20191032105862	-3.10646143651167	0.00357129043388783	0.600754660972046	-1.84163326530236
LPCAT3	4725	10162	lysophosphatidylcholine acyltransferase 3	0.433555463991754	4.57265953760524	3.1051641015116	0.00358377200872138	0.600754660972046	-1.90081622769212
FAM111A	7221	63901	family with sequence similarity 111 member A	-0.339975901242775	7.32689486040209	-3.10085489776653	0.00362552722241242	0.600754660972046	-1.8488291711093
SLC2A3	6159	6515	solute carrier family 2 member 3	0.759068191657219	8.89365571273903	3.09233395119472	0.0037094505799097	0.600754660972046	-1.88446980007538
PTPRJ	9620	5795	protein tyrosine phosphatase receptor type J	0.403589154502596	9.24718752716035	3.08082754980612	0.00382569389668188	0.600754660972046	-1.91461155522765
XKR3	1690	150165	XK related 3	-2.14819427229683	0.724172762413305	-3.07859814028421	0.00384861076365146	0.600754660972046	-3.12695289149188
TG	11132	7038	thyroglobulin	0.7437141987649	3.26181278412012	3.07515966762772	0.00388421030405984	0.600754660972046	-2.10130368658609
CD24	3097	100133941	CD24 molecule	-1.04723461353691	4.32396824492614	-3.06641216545338	0.00397618242978622	0.600754660972046	-2.02513082381597
CBL	11740	867	Cbl proto-oncogene	0.414180290923388	7.46374304306015	3.06362456836492	0.00400592077626278	0.600754660972046	-1.92818227141821
HIP1	8953	3092	huntingtin interacting protein 1	0.938030173285612	5.81100787431339	3.06320548653773	0.00401040968759629	0.600754660972046	-1.93919282500661
RPS6P25	748	729389	ribosomal protein S6 pseudogene 25	-0.613728409172265	3.47539740447816	-3.06196649268948	0.00402370869864833	0.600754660972046	-2.1391780847503
ZNF517	5308	340385	zinc finger protein 517	-0.721622315022104	1.41255752478891	-3.05409847910937	0.0041091377217208	0.600754660972046	-2.83534786664752
PFKFB3	5481	5209	6-phosphofructo-2-kinase/fructose-2,6-biphosphatase 3	1.00599944154372	6.32302768635349	3.05188832689031	0.0041334410902771	0.600754660972046	-1.95396491248064
RN7SL288P	291	106481000	RNA, 7SL, cytoplasmic 288, pseudogene	0.536800547387198	2.9424802352657	3.05115784788944	0.00414150337704076	0.600754660972046	-2.28802770319558
CMTR2	7582	55783	cap methyltransferase 2	-0.350421561711681	5.66301823604322	-3.04703376380134	0.0041872997539764	0.600754660972046	-1.97773601562097
CSRNP1	3214	64651	cysteine and serine rich nuclear protein 1	0.612684740617195	4.81595314319817	3.04525862738222	0.00420715860314375	0.600754660972046	-1.99544366106557
PIGH	2915	5283	phosphatidylinositol glycan anchor biosynthesis class H	-0.377202878411843	3.0527599130629	-3.04399811339406	0.00422131413441592	0.600754660972046	-2.26697033197453
KMO	5946	8564	kynurenine 3-monooxygenase	-0.634505502507461	3.69837536366491	-3.0396854736068	0.00427008528682975	0.600782847947524	-2.16311891683739
GRAMD1A	5942	57655	GRAM domain containing 1A	0.541776446492169	5.62889526279935	3.03563476008079	0.004316377638025	0.600782847947524	-1.99334842701591
TMEM185B	2131	79134	transmembrane protein 185B	0.434138628636319	4.1280237403279	3.02222407951935	0.00447303466316084	0.614646529727889	-2.09698726113047
SNX18	6653	112574	sorting nexin 18	0.391639790885369	7.79358329877023	3.0052741050161	0.00467870167506089	0.614646529727889	-2.05265124944692
SRGAP2C	7311	653464	SLIT-ROBO Rho GTPase activating protein 2C	-0.446741147708301	2.89751950883523	-3.00522563281208	0.00467930238713843	0.614646529727889	-2.38590206400954
PHLPP1	9142	23239	PH domain and leucine rich repeat protein phosphatase 1	0.495430102788147	3.88478822266831	2.99529097294816	0.0048039652162822	0.614646529727889	-2.18294815511596
NUBPL	7590	80224	nucleotide binding protein like	-0.569531905494058	2.51471344212116	-2.989091273597	0.0048833366639364	0.614646529727889	-2.53231466127215
ZNF543	3659	125919	zinc finger protein 543	-0.499122798551125	3.12410908177238	-2.9822944936827	0.00497176834896419	0.614646529727889	-2.35631477765623
DESI1	4972	27351	desumoylating isopeptidase 1	0.287492052001105	4.53077631099872	2.97845620720268	0.0050223704246733	0.614646529727889	-2.15315033707922
MGAM2	8162	93432	maltase-glucoamylase 2 (putative)	1.01990789470337	5.42033392282824	2.9776047487635	0.00503366103663268	0.614646529727889	-2.12182857274502
PSMD10	2459	5716	proteasome 26S subunit, non-ATPase 10	-0.318108984473294	4.11086746538427	-2.97177776190949	0.00511157124100415	0.614646529727889	-2.21770531185464
KDM3B	7961	51780	lysine demethylase 3B	0.296730771508203	7.44676618449502	2.96737172607221	0.00517123315580189	0.614646529727889	-2.13071340359145
SIGLEC5	2360	8778	sialic acid binding Ig like lectin 5	0.816328379768797	2.75248366482592	2.95930948454069	0.0052821004356525	0.614646529727889	-2.43887479922988
IL4R	5894	3566	interleukin 4 receptor	0.785511812991809	8.0596443003295	2.95000665888099	0.00541279956923511	0.614646529727889	-2.170241038045
GGPS1	3809	9453	geranylgeranyl diphosphate synthase 1	-0.233854446626627	5.29945339463084	-2.94865509747554	0.00543203879654683	0.614646529727889	-2.1888510134227
ZNF254	7602	9534	zinc finger protein 254	0.556132045465401	5.66255322425584	2.94811093469931	0.00543980295680991	0.614646529727889	-2.18081496971474
LINC01506	526	101927015	long intergenic non-protein coding RNA 1506	-0.643620468880482	4.11150830929333	-2.9423141197507	0.00552316120094223	0.614646529727889	-2.26854196277599
ZFP36	2010	7538	ZFP36 ring finger protein	0.430197038339643	5.44150364237466	2.93757135285156	0.00559225189677955	0.614646529727889	-2.1983060263532
ADAM17	5491	6868	ADAM metallopeptidase domain 17	0.386481604546406	6.80971918106882	2.93755158249736	0.00559254159234521	0.614646529727889	-2.19246857652519
ZFP36L1	5160	677	ZFP36 ring finger protein like 1	0.439711004983944	6.46322955557275	2.93676715558444	0.005604047185991	0.614646529727889	-2.19388704215368
FTH1P8	514	2501	ferritin heavy chain 1 pseudogene 8	0.711208543012404	3.51366975009231	2.93399056089998	0.00564495151883378	0.614646529727889	-2.35155685255595
VDR	5674	7421	vitamin D receptor	0.457691890419078	3.24023317503441	2.93128032812632	0.00568514807291321	0.614646529727889	-2.37229779907888
RPS2P44	846	100271248	ribosomal protein S2 pseudogene 44	0.529042444609633	3.30374309041343	2.93123668740456	0.00568579751596265	0.614646529727889	-2.39929887250142
POLB	4106	5423	DNA polymerase beta	-0.423822148100334	5.23992142118391	-2.92977412642197	0.00570760300716897	0.614646529727889	-2.22565205006911
USP9X	13962	8239	ubiquitin specific peptidase 9 X-linked	0.226895944815549	8.67356872056967	2.92026598656023	0.00585128344506886	0.614646529727889	-2.23449004825474
CXCR1	2488	3577	C-X-C motif chemokine receptor 1	0.529092257931369	9.06120890695579	2.91041053946987	0.00600378435275897	0.614646529727889	-2.26010729606562
FLOT2	3336	2319	flotillin 2	0.677519882751206	6.23551289799372	2.90737190663678	0.00605154915062415	0.614646529727889	-2.25517456139246
MAB21L3	3256	126868	mab-21 like 3	1.10969004850273	1.18597838461205	2.90682553883847	0.00606017525317879	0.614646529727889	-3.07149820125556
KIFC3	9600	3801	kinesin family member C3	0.682129200621078	2.3224100679485	2.89816998672471	0.00619837486664879	0.614646529727889	-2.60408299838192
FTH1P10	930	2502	ferritin heavy chain 1 pseudogene 10	0.788065089179233	3.09620536254067	2.89769807336931	0.0062059938657319	0.614646529727889	-2.52442240408409
TRIT1	2663	54802	tRNA isopentenyltransferase 1	-0.465244966875892	3.97823435851304	-2.89725118298407	0.00621321695014731	0.614646529727889	-2.37719912145185
COQ6	6686	51004	coenzyme Q6, monooxygenase	-0.500700042493528	3.46753161914726	-2.89238540837741	0.00629237321346206	0.614646529727889	-2.45228614471567
UBE2J1	4290	51465	ubiquitin conjugating enzyme E2 J1	0.433796578097387	7.67572438659376	2.88991659656716	0.00633289563387823	0.614646529727889	-2.29171665109722
RRP12	8529	23223	ribosomal RNA processing 12 homolog	0.543622299106611	4.81887533874303	2.88962747129652	0.00633765719562783	0.614646529727889	-2.30872658680386
MSN	5971	4478	moesin	0.298306567390718	7.962466264043	2.88830942109341	0.00635940643541796	0.614646529727889	-2.29543146879722
LINCR-0001	1271	101929191	uncharacterized LINCR-0001	0.863930400701267	1.43946859616829	2.88649463167662	0.00638946666166443	0.614646529727889	-2.98461969873576
FTH1P7	552	2500	ferritin heavy chain 1 pseudogene 7	0.58866409620078	4.62165973942367	2.88397356191454	0.00643144632799482	0.614646529727889	-2.35037179275189
UTP6	6450	55813	UTP6 small subunit processome component	-0.316769248059463	5.70577243324447	-2.88315122487822	0.00644519519192697	0.614646529727889	-2.31150887247625
ITGAE	6657	3682	integrin subunit alpha E	-0.373631544791834	2.93695892654228	-2.88270017388323	0.00645274809666333	0.614646529727889	-2.5500918274515
ZNF682	4968	91120	zinc finger protein 682	-0.644341351776081	2.2564411051977	-2.88003843673898	0.00649748800948903	0.614646529727889	-2.77462855954004
FTH1	2030	2495	ferritin heavy chain 1	0.513547821345387	7.38146406023515	2.87509725552044	0.0065813119347152	0.614646529727889	-2.3213972896761
GYG1	3511	2992	glycogenin 1	0.949317980287434	5.10052502047073	2.87359149834573	0.00660705640121965	0.614646529727889	-2.33733417859094
MITD1	4305	129531	microtubule interacting and trafficking domain containing 1	-0.272221890430933	5.61071531526534	-2.87236917703034	0.00662802404748211	0.614646529727889	-2.33497888187055
USB1	8265	79650	U6 snRNA biogenesis phosphodiesterase 1	0.6302402881748	4.83010627522629	2.87113311896962	0.00664929056137842	0.614646529727889	-2.34966297315574
LRRC27	9910	80313	leucine rich repeat containing 27	-0.713314011060462	2.00018618825692	-2.86704175101555	0.00672013870841996	0.614646529727889	-2.87433047765668
CACNA1E	17771	777	calcium voltage-gated channel subunit alpha1 E	0.971577856512465	4.25613896798404	2.86313042745597	0.00678852799556563	0.614646529727889	-2.38863860002138
KAT6A	11852	7994	lysine acetyltransferase 6A	0.269672357223302	8.7346298907054	2.8630743331114	0.00678951351450141	0.614646529727889	-2.35066172165774
COMMD3	3317	23412	COMM domain containing 3	-0.339093214252978	3.65924942036425	-2.86177961119323	0.00681229759824891	0.614646529727889	-2.46988677379079
GPN2	4979	54707	GPN-loop GTPase 2	-0.302704599654934	3.92808618855927	-2.86145742252557	0.00681797845339547	0.614646529727889	-2.44534910017218
SVIL	9937	6840	supervillin	0.417285810976269	7.10538834425902	2.86038922585072	0.00683684464805649	0.614646529727889	-2.35095590546765
BASP1	2217	10409	brain abundant membrane attached signal protein 1	0.720333488597475	7.82558205017019	2.8584410009728	0.0068713792736143	0.614646529727889	-2.35630912650166
GTF3C3	7105	9330	general transcription factor IIIC subunit 3	-0.285848366206718	5.32588575748603	-2.85744130141575	0.00688916332766886	0.614646529727889	-2.36981420414353
METTL18	1578	92342	methyltransferase like 18	-0.445141895044209	3.09573554579538	-2.85734527873725	0.00689087377399023	0.614646529727889	-2.58211579471076
TMOD2	11636	29767	tropomodulin 2	-0.540900445526375	6.48611158100657	-2.85337574750922	0.00696193082800653	0.616369387976602	-2.36594696369192
RANBP20P	2104	326627	RAN binding protein 20 pseudogene	0.537845632117251	3.61362093803576	2.84622985922892	0.00709157361446102	0.616369387976602	-2.50786340011607
CCR8	1318	1237	C-C motif chemokine receptor 8	-1.70505882943248	0.228248841782238	-2.845955993923	0.00709658670681451	0.616369387976602	-3.57282064929786
SETD6	5078	79918	SET domain containing 6, protein lysine methyltransferase	-0.539551208382994	3.23458074668032	-2.84510268726176	0.00711222766094219	0.616369387976602	-2.57457528911956
EIF1P3	334	730144	eukaryotic translation initiation factor 1 pseudogene 3	0.866144027700439	1.99812075024185	2.84148293437275	0.00717893540525938	0.616369387976602	-2.88237355718831
L3HYPDH	3504	112849	trans-L-3-hydroxyproline dehydratase	-0.528929737166419	2.92934318416066	-2.83512865136319	0.00729745101456337	0.616369387976602	-2.63264210925749
RNU7-13P	62	100147761	RNA, U7 small nuclear 13 pseudogene	0.655757219069903	1.39959117814001	2.82931886995934	0.00740740550449862	0.616369387976602	-3.07007000251798
LDLR	7771	3949	low density lipoprotein receptor	0.646701493482226	3.22349044552998	2.82558569200817	0.00747887182524366	0.616369387976602	-2.5751604062378
CST7	930	8530	cystatin F	1.28225044598141	5.15128017819934	2.82265901394513	0.00753534775696985	0.616369387976602	-2.43836086362334
IGHV3-11	473	28450	immunoglobulin heavy variable 3-11 (gene/pseudogene)	1.64878086080786	0.33740149514021	2.81760445444228	0.0076338222601786	0.616369387976602	-3.38687834514194
EIF1B-AS1	5433	440952	EIF1B antisense RNA 1	0.568367950687248	2.88075794851017	2.81385637593791	0.00770761628939695	0.616369387976602	-2.66403633267086
ZNF438	4267	220929	zinc finger protein 438	0.544407469232972	5.76623477980324	2.81099467437192	0.00776440567500293	0.616369387976602	-2.45453190258466
PHF21A	11190	51317	PHD finger protein 21A	0.44034030003384	7.10577204808661	2.80808907866743	0.00782246465693362	0.616369387976602	-2.45730382391941
FTH1P20	548	729009	ferritin heavy chain 1 pseudogene 20	0.628785772796141	4.17557271123909	2.80785846160389	0.00782709007223832	0.616369387976602	-2.51372766061196
LRRC37A2	6756	474170	leucine rich repeat containing 37 member A2	0.484209504990624	3.557691046337	2.80674540407824	0.00784945015506519	0.616369387976602	-2.58257075884046
GPX1P1	606	441481	glutathione peroxidase pseudogene 1	1.06098578686767	2.88560759966406	2.80659865241653	0.00785240266616855	0.616369387976602	-2.54783691413021
HMGN4	1274	10473	high mobility group nucleosomal binding domain 4	-0.265692273919416	5.89481915003373	-2.79552984397512	0.00807810099322208	0.616369387976602	-2.48428311160021
ZNF320	8363	162967	zinc finger protein 320	-0.566021579201837	3.07752594863865	-2.79351133249044	0.00811990470949916	0.616369387976602	-2.69212759853388
CNTRL	9417	11064	centriolin	-0.267279445567337	7.59023887673959	-2.79269166740336	0.00813693750661889	0.616369387976602	-2.488445131165
TMEM45B	3027	120224	transmembrane protein 45B	0.791285942663431	3.5334797229432	2.79232188277398	0.00814463257809562	0.616369387976602	-2.57990843958547
ZKSCAN4	2375	387032	zinc finger with KRAB and SCAN domains 4	-0.314160486108877	3.49470013248855	-2.78653100678429	0.00826602499565818	0.616369387976602	-2.62366146097872
ERO1A	7548	30001	endoplasmic reticulum oxidoreductase 1 alpha	0.429368012845917	7.31011012317495	2.78642384632236	0.00826828714595893	0.616369387976602	-2.50099999426973
COG2	10938	22796	component of oligomeric golgi complex 2	-0.213491093872292	5.34916052771927	-2.78642225335249	0.00826832077779081	0.616369387976602	-2.50821856623983
ADAM28	9351	10863	ADAM metallopeptidase domain 28	-0.700160163368317	5.41163350432511	-2.78521838279154	0.00829377410101006	0.616369387976602	-2.51282973023161
SULT1B1	7356	27284	sulfotransferase family 1B member 1	0.714480489062944	7.34881012591069	2.78492779055838	0.00829992897375396	0.616369387976602	-2.50403367511852
SLC44A2	5216	57153	solute carrier family 44 member 2	0.395142137675504	7.06603341151086	2.78355623050495	0.00832903660515427	0.616369387976602	-2.5066763574609
SENP3	3668	26168	SUMO specific peptidase 3	-0.449585876637727	3.04380262397549	-2.78192381453856	0.00836380390720959	0.616369387976602	-2.68833101841947
ABHD10	3021	55347	abhydrolase domain containing 10	-0.388751086307451	4.77984924496579	-2.78153802142182	0.00837204024480041	0.616369387976602	-2.53488758548673
ITGB4	6761	3691	integrin subunit beta 4	1.80486039140194	0.476107846322995	2.78031057839713	0.00839829524683452	0.616369387976602	-3.29204708121666
STMN1P1	440	100506685	stathmin 1 pseudogene 1	0.669167728399858	1.4078062154579	2.77984039594172	0.00840837271036541	0.616369387976602	-3.10866497242136
FAM200A	2717	221786	family with sequence similarity 200 member A	-0.370335724641767	3.02105946570686	-2.77476290283558	0.00851791760060784	0.616369387976602	-2.72096455016206
TIGD6	4640	81789	tigger transposable element derived 6	-0.54080823975194	1.97628272049187	-2.76869169128348	0.00865064242472681	0.616369387976602	-3.02205068100819
ENTPD7	3657	57089	ectonucleoside triphosphate diphosphohydrolase 7	0.462025486649055	3.41600341099246	2.76849107944862	0.00865506069006004	0.616369387976602	-2.65750326997557
COG3	6016	83548	component of oligomeric golgi complex 3	-0.155783602453897	6.11615947757132	-2.768170582409	0.00866212365179289	0.616369387976602	-2.53810625965612
ASAP1	8280	50807	ArfGAP with SH3 domain, ankyrin repeat and PH domain 1	0.38856560566917	8.52157504924677	2.7670149307274	0.0086876358446396	0.616369387976602	-2.54119160368106
KALRN	24490	8997	kalirin RhoGEF kinase	-0.655603864052534	1.87594913465975	-2.75938293818221	0.00885788028459183	0.616369387976602	-3.0680670426297
SUMF1	6952	285362	sulfatase modifying factor 1	0.278379938125992	5.13844850054762	2.75745634704976	0.00890134319253088	0.616369387976602	-2.56593566797572
SESN2	3453	83667	sestrin 2	0.57202934820586	2.34677817879052	2.75462646573628	0.00896554298334671	0.616369387976602	-2.81085227977485
STAT5B	6447	6777	signal transducer and activator of transcription 5B	0.385801288950451	7.8167882652984	2.75290229250541	0.00900486869992206	0.616369387976602	-2.5681385570415
UBE2R2	4075	54926	ubiquitin conjugating enzyme E2 R2	0.357202029150711	6.19754886953727	2.75195618903478	0.00902651582721865	0.616369387976602	-2.57004247462032
ARMC2	4250	84071	armadillo repeat containing 2	0.393902994633129	3.32333432296034	2.75046589669556	0.00906071213863443	0.616369387976602	-2.69852390310485
CDC42EP3	10406	10602	CDC42 effector protein 3	0.545573666451578	7.89636676087103	2.74555488057322	0.00917425325747239	0.616369387976602	-2.58274896561297
SLC6A12	5280	6539	solute carrier family 6 member 12	0.791479858597858	1.82146150073733	2.74452439084407	0.00919824479855404	0.616369387976602	-3.02710564499823
FAM216A	2753	29902	family with sequence similarity 216 member A	-0.461813209466617	2.77857153455279	-2.74445722640935	0.00919981051875506	0.616369387976602	-2.82409368615649
TAF9	2577	6880	TATA-box binding protein associated factor 9	-0.323620633217735	4.44948121235485	-2.74279705957933	0.00923859058153775	0.616369387976602	-2.62302841288019
RFX2	9094	5990	regulatory factor X2	0.584577959273595	3.62611600354273	2.73658477085583	0.00938505355579337	0.616369387976602	-2.66365323816979
ST3GAL2	9744	6483	ST3 beta-galactoside alpha-2,3-sialyltransferase 2	0.397986159051663	6.11603750337359	2.73544290403719	0.00941220773412262	0.616369387976602	-2.6027763535599
DAZAP2P1	503	645805	DAZ associated protein 2 pseudogene 1	0.675354847364184	2.10243374814115	2.73505503173427	0.00942144809951215	0.616369387976602	-2.88027574889048
RABGGTB	5913	5876	Rab geranylgeranyltransferase subunit beta	-0.274084825360943	5.97398642886318	-2.72097976069866	0.00976251153804723	0.616369387976602	-2.63162621558949
FTH1P11	551	2503	ferritin heavy chain 1 pseudogene 11	0.700080790743077	2.71993288815381	2.72024707246943	0.00978057505962682	0.616369387976602	-2.83305629759112
DIABLO	5967	56616	diablo IAP-binding mitochondrial protein	-0.33719438967332	3.37431694803405	-2.71925114613629	0.00980517803831331	0.616369387976602	-2.75093137253685
ZNF107	7162	51427	zinc finger protein 107	-0.474667694901256	6.53533988208491	-2.71852854152413	0.00982306485622371	0.616369387976602	-2.6361531973542
MCEE	1624	84693	methylmalonyl-CoA epimerase	-0.417498461660789	2.535290338938	-2.71498738304727	0.00991115782842695	0.616369387976602	-2.92421430018886
ZNF785	4952	146540	zinc finger protein 785	-0.574641584523073	2.20922117472536	-2.71369748870422	0.0099434277489343	0.616369387976602	-3.01879238174717
CASP6	1943	839	caspase 6	-0.419479596589906	2.94629867958225	-2.70757401157739	0.010097953161935	0.616369387976602	-2.8326815151614
LIMK2	6170	3985	LIM domain kinase 2	0.494597287363509	7.75538042559134	2.6978862793824	0.0103469682727101	0.616369387976602	-2.67675866175247
KCTD2	5279	23510	potassium channel tetramerization domain containing 2	0.265164405834303	4.86359873819431	2.69674133698912	0.0103767705079416	0.616369387976602	-2.68735037848358
MCEMP1	1906	199675	mast cell expressed membrane protein 1	1.65268639838042	2.6967083062183	2.69652487885005	0.0103824137138153	0.616369387976602	-2.8816008046996
FCER1G	964	2207	Fc fragment of IgE receptor Ig	0.577043652813488	7.26398603943289	2.6964493774418	0.0103843827527904	0.616369387976602	-2.67974573205556
ANPEP	4871	290	alanyl aminopeptidase, membrane	0.693731227870898	6.74774779108723	2.69553347271775	0.0104082966161945	0.616369387976602	-2.68187671000386
ZNF226	6922	7769	zinc finger protein 226	-0.34646316319263	5.13978935423745	-2.69173560039705	0.0105080018564128	0.616369387976602	-2.69448947928308
APBB1IP	3981	54518	amyloid beta precursor protein binding family B member 1 interacting protein	0.386266124362185	7.58141846871602	2.69053400418576	0.0105397307234009	0.616369387976602	-2.69140105506115
HVCN1	3688	84329	hydrogen voltage gated channel 1	-0.497375328067172	5.45026160752702	-2.6877840849259	0.0106126776091854	0.616369387976602	-2.69885928612284
ARFGAP3	3381	26286	ADP ribosylation factor GTPase activating protein 3	0.301115146250319	6.15480532573782	2.68629984591973	0.0106522435697343	0.616369387976602	-2.6993431463955
KREMEN1	7977	83999	kringle containing transmembrane protein 1	1.04651614795974	5.68865430489366	2.6835427489139	0.0107261027320583	0.616369387976602	-2.70456127776733
TREML2	3302	79865	triggering receptor expressed on myeloid cells like 2	0.538585588335435	6.33701636049733	2.68320349117415	0.0107352236516602	0.616369387976602	-2.70578247953772
TMEM11	3309	8834	transmembrane protein 11	0.399383946831145	2.44650502170381	2.68199508458621	0.0107677698424383	0.616369387976602	-2.94001613172735
SMPD1	2750	6609	sphingomyelin phosphodiesterase 1	0.467282409136597	2.42568091654385	2.68018122989273	0.0108167938443261	0.616369387976602	-2.95384221514105
SKIL	7782	6498	SKI like proto-oncogene	0.246007904919847	6.31280417985132	2.67918385412628	0.0108438382422853	0.616369387976602	-2.71330547398015
TMEM128	1737	85013	transmembrane protein 128	-0.396225899632003	3.02037662325512	-2.67911342162048	0.0108457504185513	0.616369387976602	-2.87263228350424
SCARF1	4961	8578	scavenger receptor class F member 1	0.641523553316001	4.8615001445824	2.67856700885371	0.0108605955981692	0.616369387976602	-2.71571289600302
LSM8	6210	51691	LSM8 homolog, U6 small nuclear RNA associated	-0.218763134590174	5.71125742298754	-2.67745065391399	0.010890983589956	0.616369387976602	-2.71677392463884
RNU6-1003P	105	106481778	RNA, U6 small nuclear 1003, pseudogene	0.820801820932708	1.49101592403848	2.67716241096048	0.0108988425217228	0.616369387976602	-3.20110047161857
SFR1	1812	119392	SWI5 dependent homologous recombination repair protein 1	-0.482497894101293	2.54282092189662	-2.67524913933954	0.0109511407327829	0.616369387976602	-2.97009903512289
POLR2G	1923	5436	RNA polymerase II subunit G	-0.197555014479517	4.5858276022364	-2.67423591563091	0.01097893043095	0.616369387976602	-2.73777394082921
TCP11L1	5370	55346	t-complex 11 like 1	0.32784835961055	4.06968420006625	2.67376302740814	0.0109919226230492	0.616369387976602	-2.75961987340282
MIR3939	106	100500857	microRNA 3939	0.894458067247823	1.08217359138552	2.67138994689436	0.011057335639419	0.616369387976602	-3.28622290148206
ZNF227	5069	7770	zinc finger protein 227	-0.276148361070344	5.0500688877804	-2.66726509058522	0.0111718917825647	0.616369387976602	-2.74248118708614
RN7SL141P	266	106480959	RNA, 7SL, cytoplasmic 141, pseudogene	0.550326448353212	1.81380345103545	2.66607836897057	0.0112050519961477	0.616369387976602	-3.13200455471304
BTN3A1	5547	11119	butyrophilin subfamily 3 member A1	-0.351867499769744	8.11417005620169	-2.66529141680678	0.0112270916496803	0.616369387976602	-2.74029336344023
AP4B1	5369	10717	adaptor related protein complex 4 subunit beta 1	-0.283709022570233	5.22238155425483	-2.66426460473546	0.0112559090758835	0.616369387976602	-2.74501394593894
LYN	6185	4067	LYN proto-oncogene, Src family tyrosine kinase	0.36211584880602	9.08163125021492	2.65820723065762	0.0114273028880668	0.616369387976602	-2.7540513719832
RAB3D	4417	9545	RAB3D, member RAS oncogene family	0.399357709873012	6.81025208408338	2.65809792746808	0.011430417632162	0.616369387976602	-2.75531213577778
PABPC1L	4984	80336	poly(A) binding protein cytoplasmic 1 like	0.480270965163421	3.59569756449162	2.65805243469535	0.0114317142418829	0.616369387976602	-2.80658361274502
DNAJC19	3586	131118	DnaJ heat shock protein family (Hsp40) member C19	-0.418583133344291	3.73320597508588	-2.6566241262987	0.0114724921751973	0.616369387976602	-2.82308441218696
ZNF234	5210	10780	zinc finger protein 234	-0.41731037900039	4.27700494948143	-2.65328550135099	0.0115683332805351	0.616369387976602	-2.79457198162783
PRCP	12798	5547	prolylcarboxypeptidase	0.26977625688914	6.82099705491078	2.64648737558097	0.0117657722395691	0.616369387976602	-2.77765881963783
LMNB1	3633	4001	lamin B1	0.635100484169007	7.2182475217122	2.64594974936707	0.0117815184247361	0.616369387976602	-2.77851815239351
CD44	10057	960	CD44 molecule (Indian blood group)	0.329665591141026	8.43999217717327	2.64425421536085	0.0118313051604587	0.616369387976602	-2.78052936631338
TCEAL3	2305	85012	transcription elongation factor A like 3	-0.677864097772548	1.16323964327694	-2.64388737331302	0.0118421023992929	0.616369387976602	-3.4049663560399
DDT	1753	1652	D-dopachrome tautomerase	-0.660778579696686	1.11062726355654	-2.64233577491037	0.0118878710274082	0.616369387976602	-3.41448751761343
RIMKLB	8619	57494	ribosomal modification protein rimK like family member B	-0.354800324874939	4.09308577961192	-2.64193862759198	0.0118996121503286	0.616369387976602	-2.82410922728552
POLH	3540	5429	DNA polymerase eta	-0.434196780268169	4.4683403828332	-2.64161653853622	0.0119091421254139	0.616369387976602	-2.80763814200473
PAQR3	12403	152559	progestin and adipoQ receptor family member 3	-0.393927158856725	3.6257420116196	-2.64149114111794	0.0119128542879262	0.616369387976602	-2.85439362437993
PDCD5	2253	9141	programmed cell death 5	-0.373919004749544	3.32538149552411	-2.64103559551603	0.011926348863261	0.616369387976602	-2.89187382362724
EEF1A1P4	1405	100421854	eukaryotic translation elongation factor 1 alpha 1 pseudogene 4	-0.537952078909081	2.03364071614031	-2.63999061042133	0.0119573575804793	0.616369387976602	-3.12206367724543
PIK3CB	7850	5291	phosphatidylinositol-4,5-bisphosphate 3-kinase catalytic subunit beta	0.289856301230234	6.3150761620537	2.63723963750267	0.0120393451047149	0.616369387976602	-2.79478272563291
TRAV9-2	394	28677	T cell receptor alpha variable 9-2	-1.15216131965877	0.901167487757752	-2.63536952311684	0.01209537572799	0.616369387976602	-3.53816016141436
PARP14	10495	54625	poly(ADP-ribose) polymerase family member 14	-0.652587178889911	9.87404080006738	-2.63522221322657	0.0120997994812652	0.616369387976602	-2.8001289516694
LRRC70	2249	100130733	leucine rich repeat containing 70	0.82550817886358	0.5836266211963	2.63471549435699	0.0121150277618285	0.616369387976602	-3.55992237869645
GK	5359	2710	glycerol kinase	0.422336702723864	6.91409873493077	2.62819755145183	0.0123124901862546	0.616369387976602	-2.81331009812107
SERPINA1	4902	5265	serpin family A member 1	0.510192328770896	7.48930994477014	2.62342130915857	0.0124590643993642	0.616369387976602	-2.82220507565775
NOTCH2	16804	4853	notch receptor 2	0.346139093107206	8.75417019448562	2.62328725509594	0.0124632013555875	0.616369387976602	-2.82032508967871
WDFY3	16856	23001	WD repeat and FYVE domain containing 3	0.555029218265028	9.18264556850282	2.61916503283842	0.0125910335450254	0.616369387976602	-2.82837109916561
TMEM260	8077	54916	transmembrane protein 260	0.377076438849164	6.10359511682355	2.61889734333986	0.0125993763120533	0.616369387976602	-2.82986664508868
RNASEH2B	8952	79621	ribonuclease H2 subunit B	-0.214628117434744	5.99549139583175	-2.61856505642083	0.0126097393883536	0.616369387976602	-2.83009106136094
U2SURP	11118	23350	U2 snRNP associated SURP domain containing	-0.18667564722351	7.49847186308964	-2.61744970354472	0.0126445814257271	0.616369387976602	-2.83373844680974
BBS10	3595	79738	Bardet-Biedl syndrome 10	-0.232281752310062	4.38673685514744	-2.61531444480735	0.0127115311231209	0.616369387976602	-2.85504195485369
FAR1-IT1	368	106478978	FAR1 intronic transcript 1	0.73439103923028	0.595242724929313	2.61508435794475	0.0127187647845041	0.616369387976602	-3.56674356291724
TLR5	4608	7100	toll like receptor 5	0.912192600726971	5.98213087716335	2.60795748870192	0.0129447092642795	0.616369387976602	-2.85025220576995
CR1	11465	1378	complement C3b/C4b receptor 1 (Knops blood group)	0.773541701901095	8.44839493352306	2.60780837893834	0.0129494757002267	0.616369387976602	-2.84995615456915
SLED1	751	643036	proteoglycan 3, pro eosinophil major basic protein 2 pseudogene	0.803051765760394	4.35848711172894	2.60664450639285	0.0129867354967534	0.616369387976602	-2.86194078302034
COTL1	6762	23406	coactosin like F-actin binding protein 1	0.301758470155867	7.55314101012293	2.60569180826866	0.0130173081762404	0.616369387976602	-2.856501328658
SLC2A14	5575	144195	solute carrier family 2 member 14	0.870481553178251	2.30905568116454	2.6055961459876	0.0130203816919571	0.616369387976602	-3.06837893785059
SNHG3	4088	8420	small nucleolar RNA host gene 3	-0.314132916095192	4.32974601620921	-2.60462889954994	0.0130514956743987	0.616369387976602	-2.87271191464767
LSM11	6584	134353	LSM11, U7 small nuclear RNA associated	-0.377095601326745	3.16397844420506	-2.60381627992341	0.0130776885088608	0.616369387976602	-2.96843985034986
WDFY1	5516	57590	WD repeat and FYVE domain containing 1	-0.286692506975365	6.78283680199397	-2.60380634081404	0.0130780091710277	0.616369387976602	-2.86029601767673
NSUN7	4728	79730	NOP2/Sun RNA methyltransferase family member 7	0.885396234272246	3.86983420144831	2.60346688646322	0.0130889652135067	0.616369387976602	-2.89280347106197
TRMT6	3776	51605	tRNA methyltransferase 6	-0.362696613919096	4.05438137496199	-2.60316794270035	0.0130986207451863	0.616369387976602	-2.89544864633721
GIMAP2	2097	26157	GTPase, IMAP family member 2	-0.435075916303107	6.3998421512891	-2.60068572152846	0.0131790468253941	0.616369387976602	-2.86519364247583
GPALPP1	10842	55425	GPALPP motifs containing 1	-0.220763590485633	4.93829481165653	-2.59908152891845	0.0132312652247707	0.616369387976602	-2.86970317925264
HLA-W	771	352966	major histocompatibility complex, class I, W (pseudogene)	0.767259819164488	2.23359205113546	2.59805354331886	0.0132648272881736	0.616369387976602	-3.06920194670388
KLC3	3654	147700	kinesin light chain 3	1.455356350031	2.11104729482214	2.59799858125735	0.0132666239117405	0.616369387976602	-3.06232526057935
SLC22A1	2312	6580	solute carrier family 22 member 1	0.72806028350411	3.22450136896943	2.59117800601074	0.0134913213543945	0.616369387976602	-2.95591451855072
ARMC10P1	855	389137	armadillo repeat containing 10 pseudogene 1	-0.382666151162618	1.89804550440929	-2.59031743740872	0.0135199190068811	0.616369387976602	-3.24420076217272
PTPRE	11235	5791	protein tyrosine phosphatase receptor type E	0.329208254026952	8.59143853437925	2.58906557835666	0.0135616190900077	0.616369387976602	-2.88554874022189
NPEPPS	11514	9520	aminopeptidase puromycin sensitive	0.247853244754098	6.91097542787521	2.58894623539693	0.0135656006277	0.616369387976602	-2.88892874272316
TLN1	10134	7094	talin 1	0.32303459202743	10.1277346445155	2.58793036545647	0.0135995357191256	0.616369387976602	-2.88982379786796
SCARNA15	4699	677778	small Cajal body-specific RNA 15	-0.449041001504295	2.5624125506084	-2.58685867932124	0.0136354198329197	0.616369387976602	-3.10323206579463
NR2C1	6529	7181	nuclear receptor subfamily 2 group C member 1	-0.349988541396871	4.50955543331221	-2.5868202693212	0.0136367075577663	0.616369387976602	-2.90140629801328
TBCA	3058	6902	tubulin folding cofactor A	-0.233921106689468	3.60119031471394	-2.58336958264656	0.013752851170291	0.616369387976602	-2.95611584470462
BLOC1S1	1656	2647	biogenesis of lysosomal organelles complex 1 subunit 1	0.57385244164327	2.88962058630855	2.58332211203782	0.0137544552551453	0.616369387976602	-2.97936978960053
RPL5P17	877	100270839	ribosomal protein L5 pseudogene 17	-0.718332956346887	1.19431120314729	-2.58206483660875	0.0137970025606874	0.616369387976602	-3.44447661259069
RPS26P3	348	441386	ribosomal protein S26 pseudogene 3	-1.42717168313535	0.737751803471162	-2.58116505271828	0.0138275261713717	0.616369387976602	-3.53931150741267
SH3GLB1	6881	51100	SH3 domain containing GRB2 like, endophilin B1	0.393252270139094	8.27519671637055	2.57904362389248	0.0138997374701042	0.616369387976602	-2.90522970553318
CYTH4	6161	27128	cytohesin 4	0.284532063350415	8.68817529824506	2.57674285948263	0.0139784442605916	0.616369387976602	-2.90842590196969
TSTD1	1210	100131187	thiosulfate sulfurtransferase like domain containing 1	-0.35368086097602	3.65065623888114	-2.57615917715043	0.0139984763635941	0.616369387976602	-2.94679795070892
ZNF562	13007	54811	zinc finger protein 562	-0.238461237010366	4.92385126838329	-2.5744783066492	0.0140563114398273	0.616369387976602	-2.9140212034448
RABGEF1	5646	27342	RAB guanine nucleotide exchange factor 1	0.476231307127757	2.59086436199497	2.57364302932637	0.0140851329682824	0.616369387976602	-3.0907435909838
PGS1	4965	9489	phosphatidylglycerophosphate synthase 1	0.596403882641541	7.00741008979869	2.57290715808052	0.0141105693663994	0.616369387976602	-2.91988354602687
SLC26A8	6036	116369	solute carrier family 26 member 8	0.910663213366998	4.47042683168724	2.5723354436246	0.0141303605396799	0.616369387976602	-2.92374955149722
ZNF879	3883	345462	zinc finger protein 879	-0.448220103648984	3.14555196382974	-2.57109920547693	0.0141732427727388	0.616369387976602	-3.03248041605858
KCNJ15	9728	3772	potassium inwardly rectifying channel subfamily J member 15	0.629345457194733	9.13446564986835	2.56972151470137	0.014221172281321	0.616369387976602	-2.92092734449761
C1QA	1272	712	complement C1q A chain	1.28328964281128	0.800021422367438	2.56832855886975	0.0142697839489006	0.616369387976602	-3.46050159615633
KDM2A	10380	22992	lysine demethylase 2A	0.204125368562018	7.65288779293589	2.56546934160957	0.0143700432540773	0.616369387976602	-2.93325957992781
IVNS1ABP	7929	10625	influenza virus NS1A binding protein	0.313882056720393	8.19283726546861	2.56361534797008	0.0144353988376841	0.616369387976602	-2.93480064151073
FTH1P3	584	2498	ferritin heavy chain 1 pseudogene 3	0.614643760455734	3.59339048316295	2.56204004323995	0.0144911443003146	0.616369387976602	-2.99554190230764
RTN4	6644	57142	reticulon 4	0.27169251253003	6.68174504376074	2.56097446844822	0.0145289637087882	0.616369387976602	-2.94190187899457
DDX10P1	1933	100421371	DEAD-box helicase 10 pseudogene 1	0.671672336333384	3.80889344000602	2.56086725722685	0.0145327738570591	0.616369387976602	-2.97934377043867
TNIP1	5793	10318	TNFAIP3 interacting protein 1	0.310637331130192	6.83866448339377	2.56077593023904	0.014536020222515	0.616369387976602	-2.9434760980888
LINC01136	2725	730227	long intergenic non-protein coding RNA 1136	1.03354871045981	0.602279617689888	2.55723898217742	0.0146622592426675	0.616369387976602	-3.55510339762425
NDUFA9	10391	4704	NADH:ubiquinone oxidoreductase subunit A9	-0.312877150642858	4.2982536426265	-2.55481164102906	0.0147494751615669	0.616369387976602	-2.96345833679358
RPS15AP40	391	100128083	ribosomal protein S15a pseudogene 40	-0.515427571204055	2.17891218866272	-2.55382340731243	0.0147851189778421	0.616369387976602	-3.24775907714328
H6PD	9321	9563	hexose-6-phosphate dehydrogenase/glucose 1-dehydrogenase	0.424383286551994	5.17796821620373	2.55224527290794	0.0148422031072458	0.616369387976602	-2.95349148297165
COX17	2172	10063	cytochrome c oxidase copper chaperone COX17	-0.3189364436149	2.94732811506859	-2.55214520742303	0.0148458294640547	0.616369387976602	-3.08190471566285
DNAJC15	8042	29103	DnaJ heat shock protein family (Hsp40) member C15	-0.423719238669474	4.93330525036811	-2.55018892980829	0.0149168878664261	0.616369387976602	-2.95987955361196
SP140	5582	11262	SP140 nuclear body protein	-0.365979121652583	6.5439859942808	-2.55006022325941	0.0149215738130164	0.616369387976602	-2.9621101413113
AQP1	3274	358	aquaporin 1 (Colton blood group)	1.26595116857367	1.08512053555961	2.54806658707322	0.0149943304773865	0.616369387976602	-3.3893087998304
OPLAH	4452	26873	5-oxoprolinase, ATP-hydrolysing	1.56402099683207	1.52557420380482	2.54720272650012	0.0150259573606143	0.616369387976602	-3.17192945798062
RNASE3	720	6037	ribonuclease A family member 3	-1.44690996978259	0.591112407392728	-2.54532840424898	0.0150947884990701	0.616369387976602	-3.66654957383953
XRN2	3437	22803	5'-3' exoribonuclease 2	0.260656169127007	7.87125831565169	2.54510342396436	0.0151030698746095	0.616369387976602	-2.97102418541102
HCK	3092	3055	HCK proto-oncogene, Src family tyrosine kinase	0.448607352884839	9.08306004232381	2.544979846045	0.0151076204658023	0.616369387976602	-2.96690982249267
LILRB3	3736	11025	leukocyte immunoglobulin like receptor B3	0.503499295256754	6.7552719268	2.54402696089947	0.0151427513617348	0.616369387976602	-2.97545699944258
TMX3	7637	54495	thioredoxin related transmembrane protein 3	-0.228236004702686	6.44367068966468	-2.54263392143126	0.015194244426177	0.616369387976602	-2.97613435055085
SLC7A11	9645	23657	solute carrier family 7 member 11	0.72789699278604	2.54858965973335	2.54262627554732	0.0151945274945183	0.616369387976602	-3.13690025185767
GBA	3648	2629	glucosylceramidase beta	0.469988857604825	3.70140374292558	2.54146688307631	0.0152375067952177	0.616369387976602	-3.00850620418438
EID1	2298	23741	EP300 interacting inhibitor of differentiation 1	-0.23759936711237	6.45440185352661	-2.54000289432763	0.0152919365986758	0.616369387976602	-2.98146704304707
HPSE	4721	10855	heparanase	0.6981280310972	5.19823507091238	2.53761113377081	0.0153812430642624	0.616369387976602	-2.98017601253504
PDPK1	10926	5170	3-phosphoinositide dependent protein kinase 1	0.345310362865673	5.09338483405298	2.53564802075322	0.0154549004976967	0.616369387976602	-2.98398813025494
PXN	7460	5829	paxillin	0.410896105045118	6.25516112583746	2.53522123809347	0.0154709563394118	0.616369387976602	-2.99098449285107
SLC12A6	10056	9990	solute carrier family 12 member 6	0.322617509589984	8.81053251015119	2.53142925410691	0.0156142847899277	0.616369387976602	-2.99294666446348
IGHV3-15	437	28448	immunoglobulin heavy variable 3-15	0.936047367718427	1.39379908496148	2.53077055358103	0.0156393056406318	0.616369387976602	-3.34484445244464
PAXIP1-AS2	2974	100132707	PAXIP1 antisense RNA 2	-0.425443196622716	3.84000564169472	-2.53047710149443	0.0156504642701164	0.616369387976602	-3.03030781308869
SFXN4	1868	119559	sideroflexin 4	-0.483647486565581	2.48562672572262	-2.52906783663312	0.0157041536274887	0.616369387976602	-3.18754945729144
HSPA5	3908	3309	heat shock protein family A (Hsp70) member 5	0.266045434115417	6.7584349608534	2.52761055760418	0.0157598492852844	0.616369387976602	-3.00560633496397
LINC01232	6199	102725509	long intergenic non-protein coding RNA 1232	-0.514334860943515	2.68595440540969	-2.52730362766659	0.0157716028234117	0.616369387976602	-3.15060957496772
IFNAR1	6301	3454	interferon alpha and beta receptor subunit 1	0.315954208054446	8.1155715087049	2.52673249636564	0.0157934949914773	0.616369387976602	-3.00455597370537
C8orf76	2467	84933	chromosome 8 open reading frame 76	-0.416634728965951	2.14668874114404	-2.52629088271862	0.0158104416310665	0.616369387976602	-3.25524870008392
IGHV1-3	395	28473	immunoglobulin heavy variable 1-3	1.11280196805991	0.909545508350735	2.52571678029342	0.0158324972966649	0.616369387976602	-3.51416342114177
ZNF263	6945	10127	zinc finger protein 263	-0.296991955285826	4.80304079721364	-2.52544891350167	0.0158427977300296	0.616369387976602	-3.00449939664054
PHF12	12227	57649	PHD finger protein 12	0.338157911063301	6.43607800029006	2.52498038959141	0.0158608288753637	0.616369387976602	-3.00999669113342
MGST3	8401	4259	microsomal glutathione S-transferase 3	-0.50146971576899	4.08578705062754	-2.52305621778901	0.0159350775383838	0.616369387976602	-3.02920752051301
SNHG1	3756	23642	small nucleolar RNA host gene 1	-0.347351443462445	5.52896309390933	-2.52218498588118	0.0159688004342095	0.616369387976602	-3.00893032413972
IDH3B	2567	3420	isocitrate dehydrogenase (NAD(+)) 3 non-catalytic subunit beta	-0.262578831414896	5.18254538196857	-2.51984374254871	0.01605974668012	0.616369387976602	-3.01265106082462
RPS7	5583	6201	ribosomal protein S7	-0.298957435125435	4.45268966309591	-2.51901536337319	0.0160920384962168	0.616369387976602	-3.0199369820759
SIRPD	1961	128646	signal regulatory protein delta	0.612749552319172	2.89505729023782	2.5178605891278	0.0161371528273217	0.616369387976602	-3.1175862915585
USPL1	5125	10208	ubiquitin specific peptidase like 1	-0.279737500985855	5.48956162182629	-2.51633432749871	0.0161969576081257	0.616369387976602	-3.01954208016132
GVINP1	8438	387751	GTPase, very large interferon inducible pseudogene 1	-0.303191508219382	7.9033933939212	-2.51590471579498	0.01621382792328	0.616369387976602	-3.02627355054038
TNFRSF10A	2951	8797	TNF receptor superfamily member 10a	-0.471617259095974	4.62562920062796	-2.51541534928052	0.0162330642913753	0.616369387976602	-3.02590941113837
LENG8-AS1	1248	104355426	LENG8 antisense RNA 1	-0.560089981452744	1.52468808432064	-2.51538779718371	0.0162341479485592	0.616369387976602	-3.4261898065241
ZNF136	5425	7695	zinc finger protein 136	-0.230473037223634	5.11117347094368	-2.50866486647555	0.0165005528379371	0.616369387976602	-3.03291154910877
DNM1L	7282	10059	dynamin 1 like	-0.201793556650882	6.1210040842826	-2.50640223833587	0.016591106354565	0.616369387976602	-3.04171757147114
TEX30	2154	93081	testis expressed 30	-0.647831357105587	2.00830169244264	-2.50566859341697	0.016620565097791	0.616369387976602	-3.33596746660704
SNHG6	1247	641638	small nucleolar RNA host gene 6	-0.350670174607315	5.11575974114307	-2.50515749281469	0.0166411160176329	0.616369387976602	-3.0393615432425
MYBPC3	4280	4607	myosin binding protein C, cardiac	0.650147952195216	2.97785871860427	2.50259415973738	0.0167445357679883	0.616369387976602	-3.11472878645463
IPMK	6133	253430	inositol polyphosphate multikinase	0.428910405547255	7.38478476301444	2.50081491176668	0.0168166654911625	0.616369387976602	-3.05535632133395
HLA-DMB	4655	3109	major histocompatibility complex, class II, DM beta	-0.428494871306816	6.56396297435199	-2.49914699474023	0.0168845392777437	0.616369387976602	-3.05720273137907
MANSC1	6015	54682	MANSC domain containing 1	0.719217007975971	5.83311739327771	2.49869370350542	0.016903028541017	0.616369387976602	-3.05453134612203
ZNF211	3300	10520	zinc finger protein 211	-0.29155989517253	4.93713563271597	-2.49749252591102	0.016952112652311	0.616369387976602	-3.05337911511693
TGM2	8036	7052	transglutaminase 2	1.02613424493859	2.6484781453425	2.49650981852787	0.0169923660137216	0.616369387976602	-3.1447599266721
GALNT2	7743	2590	polypeptide N-acetylgalactosaminyltransferase 2	0.314659282398238	4.66609914167649	2.49316537222295	0.0171300143829168	0.616369387976602	-3.06152295675209
CYSLTR1	5571	10800	cysteinyl leukotriene receptor 1	-0.513435434413584	5.59535447943256	-2.49197960930967	0.017179060853423	0.616369387976602	-3.06470503805288
MAP10	3516	54627	microtubule associated protein 10	-0.613843956602348	2.21769508030531	-2.48903705233208	0.0173013269195119	0.616369387976602	-3.31226722540378
ZNF343	4643	79175	zinc finger protein 343	-0.387835877715396	3.26578140199319	-2.48783440441678	0.0173515260854844	0.616369387976602	-3.14755519582676
CCDC144A	15568	9720	coiled-coil domain containing 144A	-1.71645475388933	2.05298626776114	-2.48681829260229	0.0173940425800867	0.616369387976602	-3.41920079009244
MAP4K4	11961	9448	mitogen-activated protein kinase kinase kinase kinase 4	0.356190529050819	8.48675299085109	2.48619827064134	0.0174200323790998	0.616369387976602	-3.07822793701965
FAM53C	7051	51307	family with sequence similarity 53 member C	0.401128075988305	5.93150054546796	2.48484585095735	0.0174768453450006	0.616369387976602	-3.08265191688255
SLC6A6	8254	6533	solute carrier family 6 member 6	0.437494093051367	8.77572130226386	2.48281335026556	0.0175625450653637	0.616369387976602	-3.08260265176458
AGPAT1	3709	10554	1-acylglycerol-3-phosphate O-acyltransferase 1	0.38221788897589	2.76162907190214	2.48257309732711	0.0175727005202505	0.616369387976602	-3.18177711231366
NUP107	8320	57122	nucleoporin 107	-0.208342734756052	5.84538037449462	-2.47653265193442	0.0178297941819789	0.616369387976602	-3.09515187613959
PHTF1	7170	10745	putative homeodomain transcription factor 1	0.679342980619447	5.72668553130588	2.47626507188002	0.0178412617850051	0.616369387976602	-3.09629812269859
POLR2C	3940	5432	RNA polymerase II subunit C	0.271188074707393	5.06992886900728	2.47626462116865	0.0178412811066813	0.616369387976602	-3.09144522891922
BCORL1	7996	63035	BCL6 corepressor like 1	0.553354036540987	3.13933320531578	2.47482860136045	0.0179029391091839	0.616369387976602	-3.15353294779123
RPS7P10	603	100128060	ribosomal protein S7 pseudogene 10	-0.433493737420625	3.60405249307052	-2.47454590611251	0.0179150999579696	0.616369387976602	-3.13620073247932
MTF1	8024	4520	metal regulatory transcription factor 1	0.397282295922431	5.97293900623391	2.47440536297231	0.0179211485746748	0.616369387976602	-3.10165275481331
RPARP-AS1	5660	100505761	RPARP antisense RNA 1	-0.392065305965647	3.68365595978621	-2.47403816276545	0.0179369607090556	0.616369387976602	-3.12742163173081
WDR5B	3720	54554	WD repeat domain 5B	-0.384610227894587	3.82730907119322	-2.47377133399565	0.0179484586836172	0.616369387976602	-3.12365242214736
SETDB2	6678	83852	SET domain bifurcated histone lysine methyltransferase 2	-0.215835612871792	5.95289023302828	-2.47046851785295	0.018091337776902	0.616369387976602	-3.10692869241508
GBP1	4992	2633	guanylate binding protein 1	-0.841967753526359	7.59445705439968	-2.46888640573511	0.0181601457449003	0.616369387976602	-3.11431660699544
HLA-DOB	1858	3112	major histocompatibility complex, class II, DO beta	-0.905259028124275	2.99309344480293	-2.46797817257641	0.0181997534512866	0.616369387976602	-3.2147941783675
MAST4	14675	375449	microtubule associated serine/threonine kinase family member 4	0.368154665632281	4.46760691271014	2.46755984073029	0.0182180231815976	0.616369387976602	-3.10953063852345
NAIP	9513	4671	NLR family apoptosis inhibitory protein	0.684815231256376	5.52682383820431	2.46712670251766	0.0182369571358512	0.616369387976602	-3.11125095605629
TMCO3	10407	55002	transmembrane and coiled-coil domains 3	0.556739083372865	6.056051573298	2.46655360573665	0.0182620366842859	0.616369387976602	-3.11718907647522
ZNF181	6266	339318	zinc finger protein 181	-0.355917783137517	4.16290808697925	-2.46617507389125	0.0182786189975591	0.616369387976602	-3.12174632606997
SLC9A8	6946	23315	solute carrier family 9 member A8	0.477126228144681	5.28443908987499	2.46482501712798	0.0183378724747164	0.616369387976602	-3.11447702276728
DIS3L	5436	115752	DIS3 like exosome 3'-5' exoribonuclease	-0.34745059995436	4.78999740270192	-2.46390416770456	0.018378388420732	0.616369387976602	-3.11402328438567
VPS26A	3565	9559	VPS26, retromer complex component A	0.217323558473743	5.28656651006368	2.46301111462337	0.0184177591570345	0.616369387976602	-3.11585153344718
RNF114	4344	55905	ring finger protein 114	-0.200888702791296	6.18873039228437	-2.46269430666833	0.0184317442399675	0.616369387976602	-3.12491297432173
KIAA0825	10403	285600	KIAA0825	0.557282978463109	6.19940546304613	2.46099859164062	0.0185067638079373	0.616369387976602	-3.12829254006421
BCL6	5938	604	BCL6 transcription repressor	0.644725315483297	8.29361439263113	2.46081213645456	0.0185150296387338	0.616369387976602	-3.12534635021863
OSM	2114	5008	oncostatin M	1.04649057546905	1.81474208098805	2.45960242349952	0.0185687396113104	0.616369387976602	-3.27262354866527
KRAS	7302	3845	KRAS proto-oncogene, GTPase	0.22137421892789	6.97668080647383	2.45767571007966	0.0186545763208066	0.616369387976602	-3.13617204315996
THAP9-AS1	4397	100499177	THAP9 antisense RNA 1	-0.263540128617154	5.00274891951233	-2.4571048548956	0.018680077614424	0.616369387976602	-3.12520040421323
HIPK2	15402	28996	homeodomain interacting protein kinase 2	0.301706816490512	6.65155187807341	2.45625584107639	0.0187180634788703	0.616369387976602	-3.13888144229901
THOC5	7878	8563	THO complex 5	0.28341368688264	6.15518298845398	2.45437740211861	0.0188023567718464	0.616369387976602	-3.13996974698032
KRBA2	2794	124751	KRAB-A domain containing 2	-0.814017931794759	0.785362009488229	-2.45303125700874	0.0188629759904207	0.616369387976602	-3.69595068346519
MON1B	6942	22879	MON1 homolog B, secretory trafficking associated	0.26833612282647	5.62082161594469	2.45180318204625	0.0189184332411953	0.616369387976602	-3.13933597347194
SMG7	8317	9887	SMG7 nonsense mediated mRNA decay factor	0.239735753163342	6.34278827622833	2.45134298013879	0.0189392531291825	0.616369387976602	-3.14625551806437
CBWD2	8396	150472	COBW domain containing 2	-0.355376589491506	3.88622349457519	-2.44990176661087	0.0190045895565053	0.616369387976602	-3.15743364194266
ZNF3	5424	7551	zinc finger protein 3	-0.230805427854213	4.68023428000005	-2.44917816226008	0.019037470857623	0.616369387976602	-3.14005501142429
ADIRF-AS1	5748	100133190	ADIRF antisense RNA 1	-1.287988820672	0.543395266127087	-2.44593422770821	0.01918551485619	0.616369387976602	-3.77057041406829
SRF	4202	6722	serum response factor	0.269193353041229	3.81323420500242	2.44562976004258	0.0191994634618129	0.616369387976602	-3.16013658412968
RMND1	2373	55005	required for meiotic nuclear division 1 homolog	-0.281250030531831	3.2934927281916	-2.44533255793904	0.0192130880962105	0.616369387976602	-3.20479007283916
NUP88	5294	4927	nucleoporin 88	-0.315209581941696	5.0041577685898	-2.44513844909861	0.019221991368537	0.616369387976602	-3.14649244815637
HSF5	4094	124535	heat shock transcription factor 5	-0.739227843623742	2.43631083324162	-2.44242481083105	0.0193468520787937	0.616369387976602	-3.32261279073739
CAPZB	3238	832	capping actin protein of muscle Z-line subunit beta	0.239601837508065	5.86781536680019	2.4390140717854	0.019504832789893	0.616369387976602	-3.16499627991633
HSP90AB4P	1574	664618	heat shock protein 90 alpha family class B member 4, pseudogene	0.5165934206349	2.45046667866701	2.43889198375507	0.0195105093958012	0.616369387976602	-3.32273727585747
FAM157C	5078	100996541	family with sequence similarity 157 member C	0.563079720227703	4.60625348867542	2.43842796912724	0.0195320979128832	0.616369387976602	-3.15825383327623
TRBV7-2	394	28596	T cell receptor beta variable 7-2	-0.846974786026083	1.7412433284689	-2.43809523797299	0.0195475917515628	0.616369387976602	-3.47445136446192
ALKBH2	2290	121642	alkB homolog 2, alpha-ketoglutarate dependent dioxygenase	-0.610582397612545	1.90706926525618	-2.4379175893641	0.0195558686418429	0.616369387976602	-3.42718070081151
TLR1	4535	7096	toll like receptor 1	0.344835920175486	9.18673310791599	2.43780458501541	0.0195611353240444	0.616369387976602	-3.16264683973681
SCARNA3	143	677679	small Cajal body-specific RNA 3	0.462905163315372	2.379908137774	2.43502146401565	0.0196912526425896	0.616369387976602	-3.31272543016742
JAK3	6813	3718	Janus kinase 3	0.373146586028968	6.97795192013797	2.43327262668139	0.0197734163178803	0.616369387976602	-3.18241727650799
ZC2HC1A	4181	51101	zinc finger C2HC-type containing 1A	-0.760307478845063	2.80951606233296	-2.43189556719148	0.0198383320312402	0.616369387976602	-3.293849764871
LINS1	7790	55180	lines homolog 1	-0.385068570967421	6.27717316193187	-2.4304111462403	0.0199085254390014	0.616369387976602	-3.18264321556378
NT5DC3	8722	51559	5'-nucleotidase domain containing 3	0.549140525424804	2.62115497378241	2.4298099344538	0.0199370188504042	0.616369387976602	-3.29587766259222
TBRG1	6627	84897	transforming growth factor beta regulator 1	-0.194508568745332	6.07559491125899	-2.42944785505274	0.0199541968385046	0.616369387976602	-3.18444763884654
GBP5	8143	115362	guanylate binding protein 5	-0.841648088064138	9.34401787763518	-2.42937791111382	0.0199575167082298	0.616369387976602	-3.17715116686138
SERTAD1	2114	29950	SERTA domain containing 1	0.44736557835695	1.983980724974	2.42523012630984	0.0201552885865035	0.616369387976602	-3.32859165734721
EBLN2	1679	55096	endogenous Bornavirus like nucleoprotein 2	0.467377893542153	3.51416987551228	2.42447858323513	0.0201913128313394	0.616369387976602	-3.21342994128432
IQSEC1	6882	9922	IQ motif and Sec7 domain ArfGEF 1	0.353536100482216	7.06492166396409	2.42438793235398	0.0201956620089836	0.616369387976602	-3.19902589349367
HSD17B4	8231	3295	hydroxysteroid 17-beta dehydrogenase 4	-0.243655357824972	6.38142333213372	-2.42371426030887	0.0202280095548307	0.616369387976602	-3.19595880817105
ZNF684	3039	127396	zinc finger protein 684	-0.451284440615163	2.18042648247653	-2.42317863855307	0.0202537619013362	0.616369387976602	-3.37101667143055
FTH1P23	550	100420300	ferritin heavy chain 1 pseudogene 23	0.829641229237978	1.44478439779069	2.42137248618601	0.020340819876872	0.616369387976602	-3.52698451008899
IL6R	6453	3570	interleukin 6 receptor	0.31582709175386	8.96608053183131	2.42118824761406	0.0203497193686543	0.616369387976602	-3.19354429399463
MRPS21	1641	54460	mitochondrial ribosomal protein S21	-0.340839767250188	4.11179428758407	-2.42086535506733	0.0203653249431602	0.616369387976602	-3.19685779862198
ZSCAN9	3705	7746	zinc finger and SCAN domain containing 9	-0.39436930109818	3.25787476513919	-2.42052945079298	0.0203815708978697	0.616369387976602	-3.24461758757443
NFATC2IP	5738	84901	nuclear factor of activated T cells 2 interacting protein	-0.268041686824549	5.50929472986111	-2.41796553208849	0.020505962090581	0.616369387976602	-3.19847966214446
DYSF	8386	8291	dysferlin	0.714469745884836	8.16274413857992	2.41707833025961	0.0205491656441645	0.616369387976602	-3.20494392823887
PLIN4	6502	729359	perilipin 4	0.764810103885448	4.21731133721395	2.41414223537035	0.0206927319852086	0.616369387976602	-3.20126452080722
TXLNB	4937	167838	taxilin beta	-0.550887573914105	1.56465802033312	-2.41373705708337	0.0207126152253312	0.616369387976602	-3.5269924642116
DPRXP2	557	503643	divergent-paired related homeobox pseudogene 2	1.34310057587363	0.256459598193927	2.41170295254307	0.0208126963619589	0.616369387976602	-3.81698804775861
DBF4B	7146	80174	DBF4 zinc finger B	-0.717302460355557	1.15757711740482	-2.41028054047546	0.0208829413969161	0.616369387976602	-3.62689168254006
CREB5	11674	9586	cAMP responsive element binding protein 5	0.53570556025813	8.40496268430859	2.40961699117803	0.0209157838305437	0.616369387976602	-3.21801694610722
TET2	16474	54790	tet methylcytosine dioxygenase 2	0.324148130726165	9.18014748746089	2.40925875719868	0.0209335340989468	0.616369387976602	-3.21370551608729
ZNF273	8652	10793	zinc finger protein 273	-0.258788846485678	3.98295249536453	-2.40864375175825	0.0209640390596562	0.616369387976602	-3.22142023738766
FAM160A2	4736	84067	family with sequence similarity 160 member A2	0.519094532410565	4.52149260366398	2.40846322639842	0.0209730009623758	0.616369387976602	-3.21039803909512
NAMPTP1	2514	646309	nicotinamide phosphoribosyltransferase pseudogene 1	0.54383070539574	10.7613151104352	2.40843909952534	0.0209741989666094	0.616369387976602	-3.21054864806843
SLC22A4	2688	6583	solute carrier family 22 member 4	0.556959796516912	5.30972328334743	2.40795192497893	0.0209984025699588	0.616369387976602	-3.21820354269188
CBX3P2	1429	645158	chromobox 3 pseudogene 2	-0.44594907545493	1.69443821865776	-2.40718317178206	0.021036646911708	0.616369387976602	-3.49500995589129
ADAM10	16168	102	ADAM metallopeptidase domain 10	0.220374307136325	8.75315500807886	2.40708798088586	0.0210413869062269	0.616369387976602	-3.22087631885113
NATD1	4931	256302	N-acetyltransferase domain containing 1	0.622396325022564	4.77523218021955	2.40696377497054	0.0210475731472399	0.616369387976602	-3.21510174400481
UVRAG	6352	7405	UV radiation resistance associated	-0.171723909733466	5.65855237649477	-2.40594717066331	0.0210982684335449	0.616369387976602	-3.22198707906788
ATP9A	8317	10079	ATPase phospholipid transporting 9A (putative)	0.920776170202856	3.82278562173144	2.40562131533856	0.021114541340399	0.616369387976602	-3.22875994655298
CTSG	1374	1511	cathepsin G	-1.75902214721743	-0.0698150541881625	-2.40454511957817	0.0211683663370485	0.616369387976602	-3.90527763458233
ZNF502	3273	91392	zinc finger protein 502	-0.703188413527877	1.94282581835146	-2.40383225211649	0.0212040881661757	0.616369387976602	-3.46789930687721
ANAPC5	12304	51433	anaphase promoting complex subunit 5	-0.181339243709489	7.20544967477234	-2.40312944327983	0.0212393593851781	0.616369387976602	-3.23709633442119
ATP1A1-AS1	2458	84852	ATP1A1 antisense RNA 1	-0.553018287355853	1.473666730448	-2.40276631353524	0.0212576042510631	0.616369387976602	-3.56166400346605
RPP38	1930	10557	ribonuclease P/MRP subunit p38	-0.300965076884408	3.16806356793298	-2.40033143639583	0.021380307735624	0.616369387976602	-3.27925264742301
FASTKD1	4451	79675	FAST kinase domains 1	-0.295474591458567	4.87120421957753	-2.40012488726488	0.0213907460430828	0.616369387976602	-3.22493275172348
ATP2B4	9721	493	ATPase plasma membrane Ca2+ transporting 4	0.383703502260001	7.42033049077357	2.39994485164495	0.0213998482085821	0.616369387976602	-3.24212083240689
S100A11	680	6282	S100 calcium binding protein A11	0.520317826502358	6.06076306588541	2.3991574430993	0.0214396988951032	0.616369387976602	-3.23776209246793
ZNF441	4748	126068	zinc finger protein 441	-0.407984448013091	4.74379548459634	-2.39869422941637	0.0214631734743742	0.616369387976602	-3.22721878791616
ORMDL1	3958	94101	ORMDL sphingolipid biosynthesis regulator 1	-0.223272811088992	6.38249060565753	-2.39809292925222	0.0214936806524756	0.616369387976602	-3.24268458842456
ZNF256	2176	10172	zinc finger protein 256	-0.572569352226648	2.67297998352693	-2.39788421131783	0.0215042792038155	0.616369387976602	-3.35656874681871
CHD4	7474	1108	chromodomain helicase DNA binding protein 4	0.162805584162251	7.7662227765517	2.39539174856082	0.0216312107371846	0.616369387976602	-3.24923170602493
NEAT1	22767	283131	nuclear paraspeckle assembly transcript 1	0.424710630453738	13.1754585171252	2.39491595576741	0.0216555179583062	0.616369387976602	-3.25461211533477
BRAF	10380	673	B-Raf proto-oncogene, serine/threonine kinase	0.182688539364156	6.93016606827801	2.39087432958165	0.0218629946115658	0.616369387976602	-3.25874526529541
C9orf106	3145	414318	chromosome 9 open reading frame 106 (putative)	0.795863167614757	0.986724155266553	2.38892751776596	0.0219635743430156	0.616369387976602	-3.61515290784113
MTCO3P11	774	107075153	MT-CO3 pseudogene 11	0.618434852109448	1.63504384142715	2.38740510471748	0.02204251939634	0.616369387976602	-3.50667161556428
SNORD17	237	692086	small nucleolar RNA, C/D box 17	-0.403283545948304	4.65676992142725	-2.38685085621907	0.0220713237250559	0.616369387976602	-3.24795448005832
KBTBD3	5516	143879	kelch repeat and BTB domain containing 3	-0.337973282500404	2.60963781729813	-2.38648879838693	0.0220901582677065	0.616369387976602	-3.3722617012315
KPNA5	11417	3841	karyopherin subunit alpha 5	-0.258944234192318	5.73773100758392	-2.38644583792593	0.0220923940700698	0.616369387976602	-3.25785171277516
LSMEM1	2592	286006	leucine rich single-pass membrane protein 1	0.616070620666535	3.7740824409353	2.38587528787026	0.022122106764038	0.616369387976602	-3.26026855028407
TANGO6	6839	79613	transport and golgi organization 6 homolog	-0.274680610504279	4.92895053902774	-2.38532864384331	0.0221506083855198	0.616369387976602	-3.25077683818129
C1orf131	5413	128061	chromosome 1 open reading frame 131	-0.250101558256353	4.1332140203184	-2.3848331185236	0.0221764733993174	0.616369387976602	-3.25736781095672
ZNF678	8915	339500	zinc finger protein 678	-0.310052587991954	4.82255863487741	-2.38359223056242	0.0222413640730047	0.616369387976602	-3.25319293553452
NLGN3	4006	54413	neuroligin 3	0.600701191529121	1.499185769468	2.38333507834718	0.0222548329770884	0.616369387976602	-3.54235111951074
TRMO	4203	51531	tRNA methyltransferase O	-0.191262613555792	5.345037528801	-2.38097930726101	0.0223785651804942	0.616369387976602	-3.26224971408531
E2F3	5164	1871	E2F transcription factor 3	0.401552903657724	5.75633790947488	2.37880963265559	0.0224930726987995	0.616369387976602	-3.27285215728216
ZNF772	6096	400720	zinc finger protein 772	-0.544510316284196	3.30914020453537	-2.37863661523373	0.022502226682933	0.616369387976602	-3.30442828701821
TAP2	6390	6891	transporter 2, ATP binding cassette subfamily B member	-0.327358913148314	6.27164589016931	-2.37835486441653	0.0225171407247159	0.616369387976602	-3.2788523789426
NFIL3	2085	4783	nuclear factor, interleukin 3 regulated	0.51202743202439	5.68763803913514	2.37752954960727	0.0225608788973244	0.616369387976602	-3.27413243541742
IL7	3392	3574	interleukin 7	-0.792460451166353	1.17640752191544	-2.37597284156054	0.0226435868018251	0.616369387976602	-3.66578147410683
HCAR2	2051	338442	hydroxycarboxylic acid receptor 2	0.37491864005155	5.7741211016886	2.374338887245	0.0227306933605963	0.616369387976602	-3.28037291422315
DUSP12	1762	11266	dual specificity phosphatase 12	-0.292341248285692	3.47415258504241	-2.37381237564552	0.0227588262546067	0.616369387976602	-3.29759258585666
RC3H1	11508	149041	ring finger and CCCH-type domains 1	0.208942582257439	8.34832069732071	2.37305852374788	0.0227991612894902	0.616369387976602	-3.28527178508783
IGLV2-14	402	28815	immunoglobulin lambda variable 2-14	0.896403880509144	2.72407427433908	2.36998360517738	0.0229643551917915	0.616369387976602	-3.32627403022455
OXSR1	6075	9943	oxidative stress responsive kinase 1	0.314953510741575	6.80962601694891	2.3663690862741	0.0231599194488633	0.616369387976602	-3.30327848748446
IGKV1-5	532	28299	immunoglobulin kappa variable 1-5	1.15746299495475	2.84604577934147	2.36551254433547	0.0232064826094506	0.616369387976602	-3.33022054241322
TRMT61B	2056	55006	tRNA methyltransferase 61B	-0.411022568019098	3.13887307283981	-2.36484070643996	0.0232430640395327	0.616369387976602	-3.33862517788276
PARP12	6285	64761	poly(ADP-ribose) polymerase family member 12	-0.546040613526891	6.08539178652031	-2.36365513032874	0.023307745386403	0.616369387976602	-3.30459176168171
OSGEP	5037	55644	O-sialoglycoprotein endopeptidase	-0.327174998063632	5.29864319393333	-2.36121990959422	0.0234411132130513	0.616369387976602	-3.29542704115439
RN7SKP151	316	106479162	RN7SK pseudogene 151	0.525027844643165	0.694621327411378	2.36001318443685	0.023507455795236	0.616369387976602	-3.7314142575034
RN7SL300P	318	106481004	RNA, 7SL, cytoplasmic 300, pseudogene	1.04313315264873	0.05124340055359	2.35959701854107	0.0235303747583182	0.616369387976602	-3.62459312177074
ANAPC10	3418	10393	anaphase promoting complex subunit 10	-0.308706532585586	3.00932038141837	-2.35804012597337	0.0236162943559403	0.616369387976602	-3.36061602708092
DLEU7	3656	220107	deleted in lymphocytic leukemia 7	-0.920357117040958	1.04944369075769	-2.35725649426074	0.0236596473004829	0.616369387976602	-3.71382840682988
C16orf72	15875	29035	chromosome 16 open reading frame 72	0.311473797359744	8.28193102634619	2.35619578105452	0.0237184435957675	0.616369387976602	-3.3156030791132
HAUS6	7932	54801	HAUS augmin like complex subunit 6	-0.203047370793759	5.25994186964724	-2.35533083058938	0.0237664860915469	0.616369387976602	-3.305950139139
SLC7A5	4745	8140	solute carrier family 7 member 5	0.859748210404033	1.90178169845751	2.35463047884435	0.0238054504531346	0.616369387976602	-3.44436186070546
C5AR1	2951	728	complement C5a receptor 1	0.424625092699902	6.11098564587461	2.35435494231658	0.023820795826295	0.616369387976602	-3.322410504054
IL1B	3096	3553	interleukin 1 beta	0.52637691241144	6.07948796191833	2.35360412960756	0.0238626558922875	0.616369387976602	-3.32159661344548
MS4A3	2095	932	membrane spanning 4-domains A3	-0.742663522776213	3.33832085869754	-2.35309537714154	0.0238910580593396	0.616369387976602	-3.33761491795067
LSM4	3029	25804	LSM4 homolog, U6 small nuclear RNA and mRNA degradation associated	-0.344610385307975	3.84067213581838	-2.3502745230892	0.0240490918511913	0.616369387976602	-3.31777136252115
TIMM21	5208	29090	translocase of inner mitochondrial membrane 21	-0.352453282468015	3.12548947964333	-2.35019164072264	0.0240537494196482	0.616369387976602	-3.36500968499402
IGHV3-74	587	28408	immunoglobulin heavy variable 3-74	1.52548065719341	1.09187728094098	2.34959084113344	0.0240875356247018	0.616369387976602	-3.56622516472806
ZNF185	4812	7739	zinc finger protein 185 with LIM domain	0.362668148014349	5.55223625241521	2.34949747807945	0.0240927897718156	0.616369387976602	-3.32019904750011
FAM89B	1458	23625	family with sequence similarity 89 member B	0.564555892884211	2.05807521170681	2.3490695032331	0.0241168879273328	0.616369387976602	-3.41010632987041
SOCS2	6776	8835	suppressor of cytokine signaling 2	-0.522199256588576	3.07216296916736	-2.34754020308896	0.0242031764763888	0.616369387976602	-3.36793820297265
N4BP1	7839	9683	NEDD4 binding protein 1	0.284072496532583	7.19532453271948	2.34731675663646	0.0242158073894147	0.616369387976602	-3.33750132726562
CHL1	11861	10752	cell adhesion molecule L1 like	-1.36810320776062	-0.0570616596759682	-2.34683758498836	0.0242429138889737	0.616369387976602	-3.92062689309274
NANS	4922	54187	N-acetylneuraminate synthase	0.271391431998777	4.27849936028658	2.34620535117511	0.024278720877017	0.616369387976602	-3.31663165980801
MTCO1P12	1543	107075141	MT-CO1 pseudogene 12	-0.457854404847534	3.48514164330114	-2.34618647978931	0.0242797904027749	0.616369387976602	-3.35039322790745
MGAM	10767	8972	maltase-glucoamylase	0.742250212045164	9.18224408488052	2.3444989801008	0.024375600357605	0.616369387976602	-3.32685649138073
SAMD9	6855	54809	sterile alpha motif domain containing 9	-0.32665280036996	9.17735790357532	-2.34344665872841	0.0244355195591223	0.616369387976602	-3.33077433919333
GRINA	2527	2907	glutamate ionotropic receptor NMDA type subunit associated protein 1	0.693976535608052	4.87987177161601	2.34291448914108	0.0244658717986308	0.616369387976602	-3.32862196113856
TLR6	6035	10333	toll like receptor 6	0.32170657944838	7.97917105853833	2.34267488749248	0.0244795485396935	0.616369387976602	-3.34203776643162
SRSF7	4045	6432	serine and arginine rich splicing factor 7	-0.266358954841715	6.71717692609122	-2.34260645422176	0.0244834560547183	0.616369387976602	-3.34570458810298
RRBP1	6980	6238	ribosome binding protein 1	0.316052367200377	6.41645795819429	2.34155805980257	0.0245433892767136	0.616369387976602	-3.34799792608234
ZNRF1	8824	84937	zinc and ring finger 1	0.414573185916833	2.17463945554086	2.34074673860843	0.0245898604790989	0.616369387976602	-3.46333096050652
ZNF680	5586	340252	zinc finger protein 680	-0.240640645818923	4.7629071212979	-2.33942264980987	0.0246658724330284	0.616369387976602	-3.32791284086751
TMEM18	5044	129787	transmembrane protein 18	-0.365887618688185	3.47236951417961	-2.33921551944223	0.0246777822856544	0.616369387976602	-3.35195848893766
ASXL2	13023	55252	ASXL transcriptional regulator 2	0.203977086523796	6.90067615881739	2.33849232024182	0.0247194063562578	0.616369387976602	-3.35396325625283
CCDC142	4897	84865	coiled-coil domain containing 142	-0.326435242956615	3.7464506496235	-2.3381224391127	0.0247407194658013	0.616369387976602	-3.3395976160202
RSBN1	6819	54665	round spermatid basic protein 1	0.294817237055542	6.65680226283199	2.33714644725165	0.0247970370495596	0.616369387976602	-3.35498316891747
BAX	2587	581	BCL2 associated X, apoptosis regulator	0.347107037902566	3.47746640163504	2.3362443407346	0.0248491938553294	0.616369387976602	-3.34319232099549
FNDC3B	13270	64778	fibronectin type III domain containing 3B	0.377744169110252	8.1571604512868	2.33486077862476	0.0249293787444997	0.616369387976602	-3.35434162831877
MLLT1	4740	4298	MLLT1 super elongation complex subunit	0.496699835992183	3.86748623363683	2.33442418113573	0.0249547302299583	0.616369387976602	-3.33739699104159
NR2C2	11821	7182	nuclear receptor subfamily 2 group C member 2	0.165908868813154	7.12320159101616	2.3343160354813	0.0249610134045025	0.616369387976602	-3.36134626542753
DMTF1	9417	9988	cyclin D binding myb like transcription factor 1	-0.164038977677685	7.38249492202924	-2.33169262132711	0.0251138685419944	0.616369387976602	-3.36550287173613
HSD17B8	1171	7923	hydroxysteroid 17-beta dehydrogenase 8	-0.850259485839521	0.640003791168536	-2.33164445955043	0.025116682580744	0.616369387976602	-3.84134084435201
HEATR6	4868	63897	HEAT repeat containing 6	-0.367142517438516	4.21276726456633	-2.33099935725444	0.0251544025520792	0.616369387976602	-3.34455684329545
ZSCAN26	2933	7741	zinc finger and SCAN domain containing 26	-0.280096857690328	4.17573178489286	-2.3298051209873	0.0252243656612641	0.616369387976602	-3.34633914806922
RCOR1	6202	23186	REST corepressor 1	0.29683330895813	6.20208045884442	2.32779046079505	0.0253427893906869	0.616369387976602	-3.36975241991313
PLXNC1	9887	10154	plexin C1	0.464212264954448	10.1858741626281	2.32745993985225	0.0253622654309196	0.616369387976602	-3.35009437234961
NAA20	2376	51126	N(alpha)-acetyltransferase 20, NatB catalytic subunit	-0.304174780510339	3.68004505810086	-2.32667605295312	0.025408510034893	0.616369387976602	-3.36240237776023
SLC1A5	3332	6510	solute carrier family 1 member 5	0.673795705239145	5.01309144507571	2.32660847679801	0.0254125001699976	0.616369387976602	-3.36034706191443
GUSBP11	6550	91316	GUSB pseudogene 11	0.55686909782003	1.15062658388639	2.32655088044379	0.0254159014777748	0.616369387976602	-3.62562039300683
BCS1L	3379	617	BCS1 homolog, ubiquinol-cytochrome c reductase complex chaperone	-0.380947069043515	2.81163920351996	-2.32651229050544	0.0254181806055851	0.616369387976602	-3.41887088117898
TRIM8	2916	81603	tripartite motif containing 8	0.348551315024985	3.95461634312071	2.3257988450916	0.0254603499351127	0.616369387976602	-3.35121853273045
ZSCAN12	5495	9753	zinc finger and SCAN domain containing 12	-0.427933479202053	3.61415778945092	-2.32485234506926	0.0255163914452239	0.616369387976602	-3.37065727359877
FTH1P2	412	2497	ferritin heavy chain 1 pseudogene 2	0.668609207438875	3.67885624292388	2.32473622563681	0.0255232744191252	0.616369387976602	-3.36953506040837
RBM17	6419	84991	RNA binding motif protein 17	-0.165899206983492	6.00736632865499	-2.32429317735168	0.0255495514283593	0.616369387976602	-3.37133231294389
DHX15	8162	1665	DEAH-box helicase 15	-0.171501470505775	7.44562503383145	-2.32412564593889	0.0255594939844898	0.616369387976602	-3.37874284425522
DENND5A	8648	23258	DENN domain containing 5A	0.311489782424037	8.38280025142548	2.32236496384399	0.0256641965552683	0.616369387976602	-3.37448608190621
HUS1	4177	3364	HUS1 checkpoint clamp component	-0.249557619788929	4.38266989732272	-2.3221342209591	0.0256779467004251	0.616369387976602	-3.35648124828255
CWF19L2	3581	143884	CWF19 like cell cycle control factor 2	-0.169439523286194	5.98368799610489	-2.32142510789346	0.0257202447600457	0.616369387976602	-3.37536223606376
DNAJC9	3955	23234	DnaJ heat shock protein family (Hsp40) member C9	-0.231431658852695	4.21368130807283	-2.32024136312722	0.025790993836687	0.616369387976602	-3.36076583931009
LTBR	6280	4055	lymphotoxin beta receptor	0.400546732108591	4.55750845552516	2.32001007525273	0.0258048376739042	0.616369387976602	-3.36191477375501
ANKRD49	3526	54851	ankyrin repeat domain 49	-0.194035401899841	5.43946253696873	-2.31869889525277	0.025883445287203	0.616369387976602	-3.37223991483815
GPR15	1252	2838	G protein-coupled receptor 15	-1.8798436696416	2.06541980798288	-2.31825975929909	0.0259098203603894	0.616369387976602	-3.59148742619229
NDUFS5	548	4725	NADH:ubiquinone oxidoreductase subunit S5	-0.299822301375153	3.78881582962794	-2.31825644632824	0.0259100194334849	0.616369387976602	-3.37379660452678
RIF1	18166	55183	replication timing regulatory factor 1	-0.194495266702581	7.84618683789301	-2.31731642508301	0.0259665599366908	0.616369387976602	-3.38902154414826
GBP4	6127	115361	guanylate binding protein 4	-0.655918460129902	6.37603293859903	-2.31683035264223	0.0259958397519152	0.616369387976602	-3.38845307114715
ZNF93	4888	81931	zinc finger protein 93	-0.322328065588984	3.62763646089649	-2.31636557294499	0.0260238646927395	0.616369387976602	-3.38081194207899
ACTN1	10626	87	actinin alpha 1	0.356880080730893	7.75670102547109	2.3147083647385	0.0261240109389692	0.616369387976602	-3.39335936004027
ZKSCAN1	10319	7586	zinc finger with KRAB and SCAN domains 1	0.160370532549351	7.00143224801379	2.31452682118183	0.0261350027625114	0.616369387976602	-3.39627118130155
FRG1HP	1699	100132352	FSHD region gene 1 family member H, pseudogene	-0.318663473835116	3.61970961476223	-2.3134178799268	0.0262022355224575	0.616369387976602	-3.38254228912423
EID2	1629	163126	EP300 interacting inhibitor of differentiation 2	-0.480721410022644	2.24442493553871	-2.31262452947145	0.0262504299929733	0.616369387976602	-3.50900695606434
MSL2	5095	55167	MSL complex subunit 2	0.133724555019318	7.35531466697013	2.31142054448543	0.026323721847701	0.616369387976602	-3.40148022513097
KCND3	7863	3752	potassium voltage-gated channel subfamily D member 3	0.898766014576199	1.31571549514378	2.31107071418079	0.0263450519939472	0.616369387976602	-3.68537432788203
B3GAT1	11425	27087	beta-1,3-glucuronyltransferase 1	1.42982488169946	0.823645618904724	2.31072882367955	0.0263659130278815	0.616369387976602	-3.72541858780956
DEFA3	498	1668	defensin alpha 3	-1.70602327774266	1.54460003073008	-2.3100235166673	0.0264089954272548	0.616369387976602	-3.57099746013209
SLC25A46	8283	91137	solute carrier family 25 member 46	-0.172896035086499	6.31146293601197	-2.30956465587309	0.0264370580461335	0.616369387976602	-3.40159401721892
LRRC25	2415	126364	leucine rich repeat containing 25	0.376948174578343	5.35557310042577	2.30834274412789	0.0265119173540143	0.616369387976602	-3.39557542500588
EIF2B1	3627	1967	eukaryotic translation initiation factor 2B subunit alpha	-0.262007712128572	5.25452897386539	-2.30812917361999	0.0265250210832792	0.616369387976602	-3.38653029716579
HACL1	3055	26061	2-hydroxyacyl-CoA lyase 1	-0.277011093349686	4.20842194992012	-2.30767944816877	0.0265526332423852	0.616369387976602	-3.38207856276298
BCAS2	1299	10286	BCAS2 pre-mRNA processing factor	-0.344627296769304	3.89816202369916	-2.30697986284923	0.0265956375604878	0.616369387976602	-3.38648344435318
NLRP9P1	2655	347933	NLR family pyrin domain containing 9 pseudogene 1	0.854685541778915	1.49602427884343	2.30597680022065	0.0266574061030198	0.616369387976602	-3.61613622744273
NR6A1	7124	2649	nuclear receptor subfamily 6 group A member 1	0.419600705612863	2.79999693692594	2.30583483507062	0.0266661587068309	0.616369387976602	-3.43864464816056
GPR27	2447	2850	G protein-coupled receptor 27	0.574235040506427	4.54517007102859	2.30513994921166	0.0267090378697417	0.616369387976602	-3.38678009976215
C11orf49	6693	79096	chromosome 11 open reading frame 49	-0.503169762801396	1.5239778764625	-2.30471743898059	0.026735139864547	0.616369387976602	-3.63540856984134
HSPA4	5156	3308	heat shock protein family A (Hsp70) member 4	-0.179693740912914	6.78419540508401	-2.30379172820555	0.0267924088405896	0.616369387976602	-3.41450209973451
USP32P1	7676	162632	ubiquitin specific peptidase 32 pseudogene 1	-1.85574620118896	-0.175406471102782	-2.30346187399757	0.0268128418242569	0.616369387976602	-4.02954353661641
LIAS	2464	11019	lipoic acid synthetase	-0.34956659820805	2.99296622464959	-2.30088158515653	0.0269731623994281	0.616369387976602	-3.44549179988665
SLC25A32	3654	81034	solute carrier family 25 member 32	-0.318631411843803	4.53389532005978	-2.30073864363315	0.0269820688550043	0.616369387976602	-3.39202454424319
DRG1	2113	4733	developmentally regulated GTP binding protein 1	-0.245982168092451	3.90836018404219	-2.30027209527138	0.0270111570985946	0.616369387976602	-3.39752030595942
STEAP4	11245	79689	STEAP4 metalloreductase	0.443227145092262	9.48066867415621	2.30004948857927	0.0270250460409049	0.616369387976602	-3.40203057301994
LINC00598	18352	646982	long intergenic non-protein coding RNA 598	0.546292093092373	1.74911819060471	2.29982727486768	0.0270389168557407	0.616369387976602	-3.59796044987367
ZBTB34	6606	403341	zinc finger and BTB domain containing 34	0.269147211588272	7.06750039834159	2.29963476386782	0.0270509387603329	0.616369387976602	-3.42315945987644
RNF170	6112	81790	ring finger protein 170	-0.262746924218991	4.12497210196241	-2.29845492629572	0.0271247219527048	0.616369387976602	-3.39700630751115
PMF1	2520	11243	polyamine modulated factor 1	0.377264550734201	3.51065065629861	2.29833398951615	0.0271322951383676	0.616369387976602	-3.4034476707249
MIA3	10171	375056	MIA SH3 domain ER export factor 3	-0.160702863249162	7.42394056267216	-2.29822118725971	0.0271393606417978	0.616369387976602	-3.42436997617909
ZNF281	4895	23528	zinc finger protein 281	0.390631350952235	7.0980944485965	2.29813110923814	0.0271450039712121	0.616369387976602	-3.42559725707907
ATOX1	5239	475	antioxidant 1 copper chaperone	0.23581207177249	3.70090684021477	2.2978780666265	0.0271608625596286	0.616369387976602	-3.40165380051431
POLR1C	2867	9533	RNA polymerase I and III subunit C	-0.415734969744766	3.17751988422245	-2.29675628076346	0.0272312668418771	0.616369387976602	-3.43524757435649
MYADM	3675	91663	myeloid associated differentiation marker	0.391029048166559	6.47996979570088	2.29596988687081	0.0272807191938453	0.616369387976602	-3.42954436867923
GTF2H2	8676	2966	general transcription factor IIH subunit 2	-0.539889139395234	2.98962316421692	-2.29573004948986	0.0272958173824884	0.616369387976602	-3.44615303051192
ZNF235	5989	9310	zinc finger protein 235	-0.316771543660918	3.95688315265962	-2.29486083867534	0.0273505985725544	0.616369387976602	-3.40605095652212
ZNF846	3912	162993	zinc finger protein 846	-0.401583438514808	2.98183442972687	-2.29344377819075	0.0274401189283085	0.616369387976602	-3.45448006538439
ACAA1	7106	30	acetyl-CoA acyltransferase 1	0.341910134115476	5.92921128940882	2.29333811976959	0.0274468042327021	0.616369387976602	-3.42743182435231
TEFM	3224	79736	transcription elongation factor, mitochondrial	-0.282249280342316	3.29487205359214	-2.29264961834179	0.0274904034306037	0.616369387976602	-3.43353602173118
NIF3L1	1985	60491	NGG1 interacting factor 3 like 1	-0.329730470155597	3.69208546200401	-2.29258078269061	0.0274947658461061	0.616369387976602	-3.41589400097001
CDK5RAP2	10080	55755	CDK5 regulatory subunit associated protein 2	0.266673264386701	6.69659235920944	2.29143444616308	0.0275675055012382	0.616871384746239	-3.43621112182846
ZNF224	7104	7767	zinc finger protein 224	-0.179844293327335	6.06473710318441	-2.29069426510403	0.0276145645942774	0.616871384746239	-3.43026779442689
FOXN3	11033	1112	forkhead box N3	0.179140079435272	7.60948053145914	2.28955048788224	0.027687425102273	0.617410081593995	-3.43915181569709
HYMAI	3585	57061	hydatidiform mole associated and imprinted	-0.541500635311281	1.2733266262965	-2.28865873203154	0.0277443509492228	0.61759217772031	-3.71896297673618
ANAPC1	13327	64682	anaphase promoting complex subunit 1	-0.331475666839414	4.30000845251959	-2.28549470799115	0.0279471760790232	0.619542584740761	-3.4168363281255
SPTY2D1	6005	144108	SPT2 chromatin protein domain containing 1	0.213948514792383	5.37885488391582	2.28378931389084	0.0280570481254388	0.619542584740761	-3.43436953479021
NFKB1	6257	4790	nuclear factor kappa B subunit 1	0.204858821457742	7.23306781012731	2.28373226065507	0.028060730529882	0.619542584740761	-3.45055088198703
RPL5P34	891	388907	ribosomal protein L5 pseudogene 34	-0.395313027994366	3.09897846372668	-2.28280322309059	0.0281207546558456	0.619542584740761	-3.46906020837185
IL23A	1187	51561	interleukin 23 subunit alpha	-0.92283690143327	1.83938086932098	-2.2827559737279	0.0281238104586172	0.619542584740761	-3.64784713598373
GSK3B	8006	2932	glycogen synthase kinase 3 beta	0.230978312580396	6.90291798520008	2.28273058016018	0.0281254528837784	0.619542584740761	-3.45260174346679
NUMB	10760	8650	NUMB endocytic adaptor protein	0.332970553969613	8.00657665156505	2.28080863928315	0.0282500113533297	0.620268152626425	-3.45112171610844
CASP5	1592	838	caspase 5	0.855902058467399	4.73557759562502	2.28071128613872	0.0282563338122096	0.620268152626425	-3.4284162142086
HSP90B2P	2384	7190	heat shock protein 90 beta family member 2, pseudogene	0.448621543227824	3.16793080525651	2.27968240806224	0.0283232303326657	0.620660960888484	-3.46376353384222
ZNF19	9225	7567	zinc finger protein 19	-0.549785688445002	0.973781061886637	-2.27823012728681	0.0284178974648956	0.621434395068363	-3.77893625444562
PSENEN	1845	55851	presenilin enhancer, gamma-secretase subunit	0.367510428355249	3.76730204275359	2.27707487883192	0.0284934047605001	0.621434395068363	-3.43156724905894
DDX60	6750	55601	DExD/H-box helicase 60	-0.748702015309968	6.9840411592846	-2.27688679748608	0.0285057147903615	0.621434395068363	-3.46332632604947
GPD1L	4802	23171	glycerol-3-phosphate dehydrogenase 1 like	-0.244893301088474	4.6993861725869	-2.27387873511516	0.0287032423465004	0.623633690208384	-3.43754545495219
PTCD3	10164	55037	pentatricopeptide repeat domain 3	-0.245694996442417	6.46878451034067	-2.27220542989697	0.0288136512773472	0.623633690208384	-3.4681820567599
QSOX1	9311	5768	quiescin sulfhydryl oxidase 1	0.576021680869073	4.2164074299432	2.27131913500961	0.0288722851291256	0.623633690208384	-3.43992002188432
XPO6	7065	23214	exportin 6	0.359371699700842	9.31274585177845	2.27094542908045	0.028897040062137	0.623633690208384	-3.45311736023933
PRPF39	4932	55015	pre-mRNA processing factor 39	-0.294505853382649	5.42970713090437	-2.2708639220905	0.0289024417500532	0.623633690208384	-3.453597955882
SCFD2	3185	152579	sec1 family domain containing 2	-0.215441330507002	4.7565903308515	-2.27079285753678	0.028907152126975	0.623633690208384	-3.44360208607561
PIK3CD	6332	5293	phosphatidylinositol-4,5-bisphosphate 3-kinase catalytic subunit delta	0.271031546155497	7.80676813662473	2.27012797156593	0.0289512561063106	0.623633690208384	-3.47125607790269
CD59	4942	966	CD59 molecule (CD59 blood group)	0.455845097664723	6.01522292222599	2.26636021554095	0.0292023225405745	0.624895418644503	-3.47602646543329
RTN3	5792	10313	reticulon 3	0.397470501290621	7.03024999911811	2.26605377013684	0.0292228280963041	0.624895418644503	-3.48212416739403
PSME2	3582	5721	proteasome activator subunit 2	-0.410174634400942	4.16064768099593	-2.2656606931709	0.0292491493921329	0.624895418644503	-3.44895762054764
RBM47	8544	54502	RNA binding motif protein 47	0.423359017157731	7.20339730669023	2.26551440924265	0.029258950298219	0.624895418644503	-3.48368553846513
LRRC37A4P	6924	55073	leucine rich repeat containing 37 member A4, pseudogene	-0.906959382919783	3.91360082117144	-2.2641314774604	0.0293517508781522	0.624895418644503	-3.45841753446464
ZNF561-AS1	4659	284385	ZNF561 antisense RNA 1 (head to head)	-0.552770937401791	1.12282764918559	-2.26356228379474	0.0293900225951294	0.624895418644503	-3.79357097325099
DPH6	9345	89978	diphthamine biosynthesis 6	-0.40527335056651	3.15849580556016	-2.26264708767817	0.0294516525663916	0.624895418644503	-3.48932368239936
GBGT1	3713	26301	globoside alpha-1,3-N-acetylgalactosaminyltransferase 1 (FORS blood group)	0.529713176004227	4.59593601483094	2.26049609029569	0.029596957530828	0.624895418644503	-3.46298555518743
MBP	18615	4155	myelin basic protein	0.204513620023587	8.61012140703268	2.25949570709035	0.0296647538925842	0.624895418644503	-3.48186727961121
RAB7A	2717	7879	RAB7A, member RAS oncogene family	0.352156348443605	6.0213697989365	2.2590301510419	0.0296963521220849	0.624895418644503	-3.48639901930867
ABCC2	6232	1244	ATP binding cassette subfamily C member 2	0.432203066035129	2.84157494246104	2.25800109317003	0.0297663031372815	0.624895418644503	-3.50251218340396
GTF2A2	3204	2958	general transcription factor IIA subunit 2	-0.223258094800401	4.22953472531875	-2.25781833106778	0.0297787419249286	0.624895418644503	-3.46128573948738
OPRL1	3549	4987	opioid related nociceptin receptor 1	0.599019762191098	1.94137933426348	2.2576767713938	0.0297883796683962	0.624895418644503	-3.56925309917153
CRYZL1	6177	9946	crystallin zeta like 1	-0.282519017133987	4.47794950397866	-2.2569196417658	0.0298399743324878	0.624895418644503	-3.46313291528582
MPV17	5625	4358	mitochondrial inner membrane protein MPV17	-0.275213560826522	4.35052797751128	-2.25600904499329	0.0299021328143702	0.624895418644503	-3.46415380801436
LRRC4	4036	64101	leucine rich repeat containing 4	0.552559933005837	5.75760575706992	2.2556100344928	0.0299294062162159	0.624895418644503	-3.49163785454645
SSBP1	4988	6742	single stranded DNA binding protein 1	-0.273572309266409	5.11906809512555	-2.25509809232827	0.0299644313476078	0.624895418644503	-3.47357108299933
CATSPERB	5635	79820	cation channel sperm associated auxiliary subunit beta	-0.647972077958787	1.64076935566554	-2.25381965108746	0.0300520574174678	0.624895418644503	-3.68182105966425
UBXN2B	5390	137886	UBX domain protein 2B	0.399242826920515	7.36480473058526	2.2534037719132	0.0300806116467612	0.624895418644503	-3.50293234037073
SLCO3A1	9435	28232	solute carrier organic anion transporter family member 3A1	0.287239277624764	6.50269321337441	2.25165002442117	0.0302012906240474	0.624895418644503	-3.5063207396866
NIFK-AS1	2551	254128	NIFK antisense RNA 1	-0.303102724649869	3.26627507045297	-2.25057932035675	0.0302751804324052	0.624895418644503	-3.49527620210384
TCTN1	9605	79600	tectonic family member 1	-0.52576032910309	3.23798537366526	-2.24993229270967	0.0303199103595164	0.624895418644503	-3.49864724463745
CDK5RAP1	4567	51654	CDK5 regulatory subunit associated protein 1	-0.28991667795631	4.63543939196072	-2.24822283424681	0.0304383717258009	0.624895418644503	-3.47845515381939
SNHG15	3647	285958	small nucleolar RNA host gene 15	-0.407781270515506	3.49793945752347	-2.24714003394254	0.0305136208406531	0.624895418644503	-3.48603048127832
VAPA	11880	9218	VAMP associated protein A	0.320192693743227	7.49264821465946	2.24652431676236	0.030556484098484	0.624895418644503	-3.51474643240641
CYB5R3	5973	1727	cytochrome b5 reductase 3	0.508439329490562	3.53046295799349	2.24616674487824	0.0305814011960547	0.624895418644503	-3.48217516507691
SRA1	3396	10011	steroid receptor RNA activator 1	0.299187906467535	4.4941011557714	2.24592829989709	0.030598027115798	0.624895418644503	-3.48267744750971
MICU1	3846	10367	mitochondrial calcium uptake 1	0.267064668399264	5.29273294220997	2.2451102850897	0.0306551257252761	0.624895418644503	-3.49515419221347
SGSH	6713	6448	N-sulfoglucosamine sulfohydrolase	0.51532060717661	2.94834339199571	2.24472303985093	0.0306821891595098	0.624895418644503	-3.49833097726425
CUX1	17788	1523	cut like homeobox 1	0.308860373037599	6.37287495372566	2.24422386304711	0.0307171066298742	0.624895418644503	-3.51863216916774
GPAM	9808	57678	glycerol-3-phosphate acyltransferase, mitochondrial	-0.322070711023542	3.77819021524611	-2.24401175229539	0.0307319545354162	0.624895418644503	-3.48807951823094
SUPV3L1	4283	6832	Suv3 like RNA helicase	-0.268825475926009	4.17309108150935	-2.2426938099996	0.0308243551054317	0.624895418644503	-3.48538894860171
CETN3	3106	1070	centrin 3	-0.388673206385702	2.75718960917285	-2.24214886815937	0.0308626332331976	0.624895418644503	-3.54053285549947
SH2B2	2384	10603	SH2B adaptor protein 2	0.482110854307285	2.35153973932288	2.24001516223625	0.0310129188399085	0.624895418644503	-3.54974284247786
CDKN2AIP	3193	55602	CDKN2A interacting protein	-0.212248540065456	5.18043886286711	-2.23831843092342	0.0311328922886148	0.624895418644503	-3.50442546365188
CLECL1	1721	160365	C-type lectin like 1	-0.820369220803611	1.33315998889627	-2.23696375959451	0.0312289762537477	0.624895418644503	-3.75846632720528
LIN52	3692	91750	lin-52 DREAM MuvB core complex component	-0.302586624893482	3.32062110267373	-2.23464520756996	0.0313940401773605	0.624895418644503	-3.51654045320829
TRIM37	5482	4591	tripartite motif containing 37	-0.246925833680617	5.18675002541505	-2.23427509997141	0.0314204610254582	0.624895418644503	-3.51079546935311
FAM126B	12810	285172	family with sequence similarity 126 member B	0.537089197750515	8.84308356189383	2.23398300859221	0.0314413265331626	0.624895418644503	-3.52148666419246
NUAK2	3441	81788	NUAK family kinase 2	0.343589186548074	5.19450374672449	2.23375264229152	0.0314577914332801	0.624895418644503	-3.51943989858595
TACSTD2	2351	4070	tumor associated calcium signal transducer 2	-1.85401989298234	-0.568202420996487	-2.2337002656457	0.0314615360059247	0.624895418644503	-4.11200003887702
RN7SL681P	292	106479471	RNA, 7SL, cytoplasmic 681, pseudogene	0.647718691996959	1.18556927230614	2.23368291387775	0.0314627766265396	0.624895418644503	-3.78823892506746
PIGL	6162	9487	phosphatidylinositol glycan anchor biosynthesis class L	-0.386596074077898	3.73696812595389	-2.23289777530087	0.0315189583083996	0.624895418644503	-3.50566235303964
CHST2	4582	9435	carbohydrate sulfotransferase 2	0.506734281929321	4.55226484977319	2.2324280356087	0.0315526139396049	0.624895418644503	-3.50680446441955
NUB1	5411	51667	negative regulator of ubiquitin like proteins 1	-0.279971000701001	6.59312455716797	-2.2323721562752	0.0315566196808936	0.624895418644503	-3.53894487391154
DHX35	4930	60625	DEAH-box helicase 35	-0.334381169903557	3.68325515478359	-2.23219319311912	0.0315694518066812	0.624895418644503	-3.50799964442305
SLC9A1	5974	6548	solute carrier family 9 member A1	0.484853262133724	3.08302552203826	2.23116760980441	0.0316430785766892	0.624895418644503	-3.51769857012217
MAPKAPK5-AS1	2290	51275	MAPKAPK5 antisense RNA 1	-0.391140010603774	3.49486141978556	-2.23103427397581	0.0316526620114911	0.624895418644503	-3.51652233792054
LCMT2	6957	9836	leucine carboxyl methyltransferase 2	-0.421693265457451	3.10794544056089	-2.22998636767863	0.0317280697899385	0.624895418644503	-3.53108639041819
SEPHS2	2551	22928	selenophosphate synthetase 2	0.304120348667205	4.47493427818461	2.22926584911624	0.0317800114801062	0.624895418644503	-3.50858340566445
SPTB	14831	6710	spectrin beta, erythrocytic	0.976426296395084	6.70618844997822	2.22852099061813	0.031833787487288	0.624895418644503	-3.54774311757855
UBA1	6437	7317	ubiquitin like modifier activating enzyme 1	0.229021579836201	6.56690356249774	2.22726684989841	0.0319245150372317	0.624895418644503	-3.54966038750113
NOM1	7788	64434	nucleolar protein with MIF4G domain 1	-0.316450704160173	4.68437672995315	-2.2259174383176	0.0320223920122047	0.624895418644503	-3.5166686812955
B4GALT5	4722	9334	beta-1,4-galactosyltransferase 5	0.56762355811559	7.69270455852662	2.22576987547913	0.0320331114018895	0.624895418644503	-3.54817160640514
CD24P4	243	938	CD24 molecule pseudogene 4	-1.21275446842402	-0.221978315914425	-2.22534664835558	0.032063873577833	0.624895418644503	-3.97147574816693
TRAPPC11	5841	60684	trafficking protein particle complex 11	-0.155609909871401	6.52665072510497	-2.22525756871518	0.032070351665309	0.624895418644503	-3.55022398636777
MINCR	1405	100507316	MYC-induced long non-coding RNA	-0.618855751908591	0.918039815069266	-2.22488341323286	0.0320975738971494	0.624895418644503	-3.86034675791128
MTCYBP23	1102	107075131	MT-CYB pseudogene 23	0.614747658380759	3.07527602640637	2.22434060172851	0.0321371035462247	0.624895418644503	-3.53101350694794
MRPL46	6432	26589	mitochondrial ribosomal protein L46	-0.358248387424045	3.29037429683207	-2.22398340190152	0.0321631398862645	0.624895418644503	-3.53072361231818
TMEM62	4810	80021	transmembrane protein 62	-0.289841823733699	3.92292009344296	-2.22315048399185	0.0322239243907576	0.624895418644503	-3.51673464286597
BISPR	2525	105221694	BST2 interferon stimulated positive regulator	-0.529042973379812	3.52664491404631	-2.22247236069114	0.032273487880399	0.624895418644503	-3.52342140487947
HORMAD1	2405	84072	HORMA domain containing 1	0.541135789522632	3.96146364062357	2.22130675011241	0.0323588401212737	0.624895418644503	-3.51932428679592
LACTB2	1931	51110	lactamase beta 2	-0.297549382789511	3.06103388419036	-2.22111129133137	0.0323731723258689	0.624895418644503	-3.55024259295437
RPL5P4	886	643343	ribosomal protein L5 pseudogene 4	-0.456714398238685	3.03382894472384	-2.22068688720377	0.0324043116376495	0.624895418644503	-3.56023948294155
C6orf120	2667	387263	chromosome 6 open reading frame 120	-0.169530479805142	5.23616325243889	-2.22055634242809	0.0324138953113733	0.624895418644503	-3.53836583064096
CLPTM1	5229	1209	CLPTM1 regulator of GABA type A receptor forward trafficking	0.337441628979508	4.01865843157743	2.21909147430515	0.0325216087771805	0.624895418644503	-3.52260528129912
CREBZF	5587	58487	CREB/ATF bZIP transcription factor	-0.252143379778032	6.77874533128744	-2.21850989769752	0.032564461101812	0.624895418644503	-3.56554986616225
TBC1D14	6241	57533	TBC1 domain family member 14	0.423444805022328	7.95126468271295	2.21787059842494	0.0326116246114236	0.624895418644503	-3.55994040398629
UBQLN2	4230	29978	ubiquilin 2	0.276165635562942	4.91914642567644	2.21778162888449	0.0326181930474864	0.624895418644503	-3.53634977607157
RDH5	2983	5959	retinol dehydrogenase 5	0.573662633506481	0.888143765948984	2.21732889877023	0.0326516354207713	0.624895418644503	-3.79199302338224
C3orf38	3478	285237	chromosome 3 open reading frame 38	-0.203418015562529	5.50255378019567	-2.21692414532671	0.0326815596844812	0.624895418644503	-3.5471580819159
TMEM184B	7080	25829	transmembrane protein 184B	0.421027395854829	3.66491899311232	2.21598179085163	0.0327513245265637	0.624895418644503	-3.52784404425639
MICA	2386	100507436	MHC class I polypeptide-related sequence A	-0.314702128234894	3.25865158298747	-2.21532708668244	0.0327998719206963	0.624895418644503	-3.54157693442824
ZNF711	5004	7552	zinc finger protein 711	-0.693642811454745	1.34264323669006	-2.21442246038557	0.0328670568533488	0.624895418644503	-3.78947376459132
LPAR6	4348	10161	lysophosphatidic acid receptor 6	-0.408460805429328	5.99654652511535	-2.21332461270796	0.0329487564899921	0.624895418644503	-3.55976299454629
ABHD2	10345	11057	abhydrolase domain containing 2	0.261566867247547	8.67010680826233	2.2132344762997	0.0329554722840424	0.624895418644503	-3.56039635786059
CNN2	3645	1265	calponin 2	0.419429930840276	6.46099604546042	2.21321705075015	0.032956770750107	0.624895418644503	-3.57352754541509
ATG5	5546	9474	autophagy related 5	-0.18277958675792	4.89530566222126	-2.21300027603448	0.0329729275401276	0.624895418644503	-3.54162161984021
LYSMD4	5697	145748	LysM domain containing 4	-0.496654232412251	2.88404063733199	-2.21239308343221	0.033018220733416	0.624895418644503	-3.5774891417148
TBC1D15	8227	64786	TBC1 domain family member 15	0.173915812749996	6.46653888099539	2.21210093566305	0.0330400330549927	0.624895418644503	-3.5722310241009
ZNF548	6161	147694	zinc finger protein 548	-0.41145743293427	4.57431676391873	-2.21188127306517	0.0330564419365883	0.624895418644503	-3.53584049495393
PDCD2	6476	5134	programmed cell death 2	-0.240725210647533	5.59324203876873	-2.21147869239161	0.0330865336941045	0.624895418644503	-3.55977158465507
IL2RA	3176	3559	interleukin 2 receptor subunit alpha	-0.688035266640229	3.30037664799086	-2.21102384552799	0.0331205615248161	0.624895418644503	-3.55489115948323
MTND5P32	1802	107075254	MT-ND5 pseudogene 32	0.71697665987036	3.29726604871644	2.20970169139177	0.0332196508908718	0.624895418644503	-3.54598892052893
TSHZ3	5817	57616	teashirt zinc finger homeobox 3	0.507876254067042	3.49146316224704	2.20913410460492	0.033262269759678	0.624895418644503	-3.54290730785175
PCBP2	7926	5094	poly(rC) binding protein 2	0.307890366457208	6.83726255772608	2.20689893929069	0.0334305768124866	0.624895418644503	-3.58453277276862
PDK2	5481	5164	pyruvate dehydrogenase kinase 2	0.567087926278119	2.83713130969536	2.20445040532878	0.033615819406103	0.624895418644503	-3.57692717944038
RTF1	5770	23168	RTF1 homolog, Paf1/RNA polymerase II complex component	0.171699073095167	6.02356762272319	2.20419229453692	0.0336353997269673	0.624895418644503	-3.57993505124603
SLC35A3	14899	23443	solute carrier family 35 member A3	-0.256919328566576	5.32822984091836	-2.20348540747503	0.0336890762049169	0.624895418644503	-3.56603358833709
ADGRE2	8622	30817	adhesion G protein-coupled receptor E2	0.560034263793476	7.34668086156495	2.20339752699429	0.0336957546058155	0.624895418644503	-3.59000523619672
C15orf41	9009	84529	chromosome 15 open reading frame 41	-0.363364464058023	2.39773118464205	-2.20327609032766	0.0337049850169858	0.624895418644503	-3.63188571365152
TTC14	7783	151613	tetratricopeptide repeat domain 14	-0.251822479396611	7.26157463597332	-2.20316061785726	0.0337137641741725	0.624895418644503	-3.59067654421906
TRIM25	6666	7706	tripartite motif containing 25	0.401985043904858	8.04364224538718	2.20308414873698	0.0337195790980809	0.624895418644503	-3.5839588691752
NT5M	1961	56953	5',3'-nucleotidase, mitochondrial	0.894518885487309	2.4239236161492	2.20283968401383	0.0337381748557301	0.624895418644503	-3.58645748027854
PGBD4	6612	161779	piggyBac transposable element derived 4	-0.384167671489115	2.46643996466685	-2.20281573755469	0.0337399968870609	0.624895418644503	-3.62461204018709
CCNJ	4148	54619	cyclin J	-0.288537387305823	3.63457453391743	-2.20256441512726	0.0337591247135929	0.624895418644503	-3.55394401995741
TLE3	12634	7090	TLE family member 3, transcriptional corepressor	0.351956889506851	6.81768271172695	2.20208728283253	0.0337954651643364	0.624895418644503	-3.59500769933583
FNIP1	7942	96459	folliculin interacting protein 1	0.2863697838288	8.08965772103802	2.20035028394482	0.0339280563953574	0.626299401465506	-3.58909139039555
NPIPB9	2123	100507607	nuclear pore complex interacting protein family member B9	0.526534311091056	1.01396653691936	2.19953935469445	0.0339901156407966	0.626299401465506	-3.8513265339549
TMEM158	1813	25907	transmembrane protein 158 (gene/pseudogene)	1.63310048543206	-0.0439145065636095	2.19902202789911	0.0340297586030099	0.626299401465506	-3.95552082877292
SUGT1	15102	10910	SGT1 homolog, MIS12 kinetochore complex assembly cochaperone	-0.218350929211447	6.13439052552654	-2.19814313089366	0.0340972030463918	0.626299401465506	-3.59151369890767
ACTBP2	1123	62	ACTB pseudogene 2	0.420798800977428	3.35593263707479	2.19751890512213	0.0341451767454502	0.626299401465506	-3.56486564069798
SEL1L	9559	6400	SEL1L adaptor subunit of ERAD E3 ubiquitin ligase	0.172972950317465	7.90565528634922	2.19722118183803	0.0341680788262012	0.626299401465506	-3.59666753906662
CLTC	11836	1213	clathrin heavy chain	0.226541064679614	8.22450926633142	2.19589014995775	0.0342706341806612	0.626423437552389	-3.59540887253351
HMGN1	5102	3150	high mobility group nucleosome binding domain 1	-0.294537887228596	5.97044289128675	-2.19584963856966	0.0342737598471345	0.626423437552389	-3.59310791617583
USP30	5135	84749	ubiquitin specific peptidase 30	-0.283206190457566	3.25062784578282	-2.19268584264138	0.0345186468895529	0.629767715745278	-3.57889150359527
SH3KBP1	5780	30011	SH3 domain containing kinase binding protein 1	0.170179594489859	6.98590431757163	2.19199417520199	0.0345723905222652	0.629767715745278	-3.60966653145739
TMTC3	7327	160418	transmembrane O-mannosyltransferase targeting cadherins 3	-0.20774120053155	4.8882543026324	-2.19156339876045	0.0346059000599016	0.629767715745278	-3.57663020928999
RBM26-AS1	3747	100505538	RBM26 antisense RNA 1	-0.660995665601094	1.46952399256784	-2.19080977633819	0.034664592736135	0.62993074834417	-3.79532094885408
ACAP2-IT1	690	100874306	ACAP2 intronic transcript 1	0.357212176393665	3.05028393034244	2.18821408969769	0.0348674238133869	0.631525880667248	-3.5893052628089
SUPT7L	5309	9913	SPT7 like, STAGA complex gamma subunit	-0.224784365354901	5.26657919669332	-2.18795907638877	0.0348874076859964	0.631525880667248	-3.58933572400424
ATG9A	8136	79065	autophagy related 9A	0.454723404992481	4.49452357083001	2.18707709321183	0.034956601861616	0.631525880667248	-3.58213952882533
RPL7P18	734	100270852	ribosomal protein L7 pseudogene 18	0.545807981750871	1.88409449010964	2.18610305229135	0.0350331597613064	0.631525880667248	-3.70620747543942
MSL3	6496	10943	MSL complex subunit 3	0.414912131495874	6.68497209088435	2.18594078408828	0.0350459282063362	0.631525880667248	-3.61907057797597
CCDC150P1	2215	100420678	coiled-coil domain containing 150 pseudogene 1	0.47217360608403	2.33134082243844	2.18462017084455	0.0351499973600419	0.631525880667248	-3.6487393034766
RHOC	4028	389	ras homolog family member C	0.437823489811441	3.18617891707806	2.18449566794742	0.0351598227752939	0.631525880667248	-3.58332165653189
RMDN1	5646	51115	regulator of microtubule dynamics 1	-0.21959756705825	5.07961569699107	-2.18427142256767	0.0351775257322516	0.631525880667248	-3.59274052666534
APOL6	10121	80830	apolipoprotein L6	-0.491324573528749	8.80059200454383	-2.18358104771065	0.0352320767522131	0.631525880667248	-3.60857446067607
ADARB2	10513	105	adenosine deaminase RNA specific B2 (inactive)	2.64369152654972	-0.265447891273147	2.18334215221304	0.0352509709167649	0.631525880667248	-4.09845348245466
CD83	2515	9308	CD83 molecule	-0.531633418548824	2.98574141234707	-2.18188872161834	0.0353661161037385	0.632693822838915	-3.61310885871018
PRDM10	6626	56980	PR/SET domain 10	0.254462198921916	4.92628566875034	2.17912204371103	0.0355862231442728	0.633957325550475	-3.59861692718933
BET1	5247	10282	Bet1 golgi vesicular membrane trafficking protein	-0.291737148165939	4.35265304454602	-2.17856347717215	0.0356308078283317	0.633957325550475	-3.58750100132683
MKNK1	8070	8569	MAPK interacting serine/threonine kinase 1	0.501657103810532	6.82225754734435	2.17714554893947	0.035744209170742	0.633957325550475	-3.63487417745198
PAN2	7288	9924	poly(A) specific ribonuclease subunit PAN2	-0.323872232777865	5.28807454221135	-2.17544857582234	0.0358803482344934	0.633957325550475	-3.61104697214304
UBR1	9928	197131	ubiquitin protein ligase E3 component n-recognin 1	-0.152050076594846	6.89021623699329	-2.17520867884283	0.0358996309245379	0.633957325550475	-3.63798726610901
CSF2RB	5000	1439	colony stimulating factor 2 receptor beta common subunit	0.337004735787412	8.45045237818069	2.17510613672007	0.0359078759647167	0.633957325550475	-3.62605405304427
AKAP8	4296	10270	A-kinase anchoring protein 8	-0.177403380672365	5.17269877660805	-2.17482708520659	0.0359303219856589	0.633957325550475	-3.61272897803329
SUSD6	5830	9766	sushi domain containing 6	0.304018033532898	5.92451461211969	2.17329599493771	0.0360536995261757	0.633957325550475	-3.63580210377856
PLIN3	2813	10226	perilipin 3	0.439652371588762	5.45373763294099	2.17227052517723	0.0361365432438391	0.633957325550475	-3.63104959297328
JAZF1	4020	221895	JAZF zinc finger 1	0.537508379305776	7.36317652211689	2.17198089838327	0.0361599715996032	0.633957325550475	-3.64230259611874
LINC00926	3669	283663	long intergenic non-protein coding RNA 926	-0.599834215058619	4.13734620409644	-2.17037847756632	0.0362898372997243	0.633957325550475	-3.59845512415723
MIR17HG	3492	407975	miR-17-92a-1 cluster host gene	-0.488702613096788	3.20014288791178	-2.16914429653044	0.0363901411345273	0.633957325550475	-3.61004043222342
POR	6112	5447	cytochrome p450 oxidoreductase	0.601690069827348	5.11743418404706	2.16849033074353	0.0364433894567548	0.633957325550475	-3.62694796739741
CD1D	2253	912	CD1d molecule	-0.415989515190618	5.30245124959987	-2.16842418329902	0.036448779269436	0.633957325550475	-3.62662498311295
CD52	935	1043	CD52 molecule	-0.347650894494995	7.40732057047616	-2.16831829244864	0.0364574089163481	0.633957325550475	-3.64971276329982
MRPL52	3213	122704	mitochondrial ribosomal protein L52	-0.332198876942636	3.34913697582587	-2.16759296073831	0.0365165689944585	0.633957325550475	-3.60818763308831
USF3	13738	205717	upstream transcription factor family member 3	0.198301286900542	7.24489406296157	2.16628408546589	0.0366235397240897	0.633957325550475	-3.65238205270179
LAPTM4B	3197	55353	lysosomal protein transmembrane 4 beta	0.479031428005001	2.31156208772717	2.16536623090876	0.0366987188839273	0.633957325550475	-3.68232584098828
WASF2	5676	10163	WASP family member 2	0.31103795525054	6.81094033777735	2.16510650915681	0.0367200168335738	0.633957325550475	-3.65734525906597
STX16	5099	8675	syntaxin 16	0.216432523932665	6.18464484749458	2.16500897043817	0.0367280181230345	0.633957325550475	-3.65224177111877
ZNF749	3017	388567	zinc finger protein 749	-0.63966973270002	2.10550740563701	-2.16482046287012	0.0367434861384798	0.633957325550475	-3.7164560198709
FGGY	12174	55277	FGGY carbohydrate kinase domain containing	0.345336743764491	4.11637146489375	2.16419773877549	0.0367946248663461	0.633957325550475	-3.60769687577939
NRBP1	5329	29959	nuclear receptor binding protein 1	0.177405659158283	5.55520493753214	2.16410526524333	0.0368022242576856	0.633957325550475	-3.63949732071258
UFSP2	2781	55325	UFM1 specific peptidase 2	-0.279498154875244	3.95520125018569	-2.16364763773609	0.0368398521337251	0.633957325550475	-3.60798528872287
TSC22D1	8586	8848	TSC22 domain family member 1	0.376430001966788	5.80142415960721	2.16337023474341	0.036862677843807	0.633957325550475	-3.64507246356475
PRORSD1P	2204	344405	prolyl-tRNA synthetase associated domain containing 1, pseudogene	-0.417085469657337	1.92769518602923	-2.16205876237386	0.0369707601050172	0.633957325550475	-3.75427596967385
PEX10	3789	5192	peroxisomal biogenesis factor 10	-0.297252407180312	2.05298425258852	-2.16045303208089	0.0371034749888435	0.633957325550475	-3.70790282412105
RINT1	3655	60561	RAD50 interactor 1	-0.228124491554876	4.40968961323802	-2.15970268096688	0.0371656365487764	0.633957325550475	-3.61750705121498
CARM1	4455	10498	coactivator associated arginine methyltransferase 1	0.657962362709411	4.68518190633035	2.15870840190751	0.0372481478880887	0.633957325550475	-3.63362052465648
DTWD1	15053	56986	DTW domain containing 1	-0.285729055880134	4.26698750770388	-2.15854284290057	0.0372619027175043	0.633957325550475	-3.61688542809577
GAS7	10100	8522	growth arrest specific 7	0.401001740090313	6.45588913052572	2.1583762717674	0.0372757461717065	0.633957325550475	-3.66638160500812
FMO5	5986	2330	flavin containing dimethylaniline monoxygenase 5	-0.409469928247397	3.28715979958382	-2.15806913607752	0.0373012836497464	0.633957325550475	-3.62599119382951
FOLR3	1396	2352	folate receptor gamma	0.884474384895686	4.0608117699389	2.15802483131206	0.0373049687452064	0.633957325550475	-3.61960069970942
DCAF16	4816	54876	DDB1 and CUL4 associated factor 16	-0.236172503359325	5.81263999965589	-2.15765084008293	0.0373360886990758	0.633957325550475	-3.65341067315604
FFAR2	2149	2867	free fatty acid receptor 2	0.362554097394209	7.12506908663304	2.15746329750162	0.0373517028358123	0.633957325550475	-3.66896215271442
LRG1	3133	116844	leucine rich alpha-2-glycoprotein 1	0.574887787784392	5.7609409286774	2.15735973954201	0.0373603271838425	0.633957325550475	-3.66118657902101
PPP4R2	5964	151987	protein phosphatase 4 regulatory subunit 2	0.346836915088216	7.48597890101246	2.15728057977655	0.0373669208287699	0.633957325550475	-3.66666795631583
TMEM169	3628	92691	transmembrane protein 169	0.538967511763957	1.86255807424914	2.15615500358539	0.0374607876312813	0.633957325550475	-3.73841575650667
CTCF	4301	10664	CCCTC-binding factor	0.190586704924232	5.71011244961739	2.15578578454578	0.0374916238575171	0.633957325550475	-3.65505479224656
RPS19P3	441	728953	ribosomal protein S19 pseudogene 3	0.396943332945285	2.19612870694148	2.15395605902987	0.0376447694631984	0.633957325550475	-3.68287328209674
AATK	6225	9625	apoptosis associated tyrosine kinase	0.626494937720366	4.33868153024814	2.15265538430058	0.0377539704462569	0.633957325550475	-3.64093418933326
NUDT12	4304	83594	nudix hydrolase 12	-0.635920496857	1.44390776155701	-2.15117268366392	0.0378787954475038	0.633957325550475	-3.83000947745825
UBXN7	11291	26043	UBX domain protein 7	0.165769953384013	7.1339953444851	2.15081289986828	0.0379091397486726	0.633957325550475	-3.6800168901463
DCTN2	4217	10540	dynactin subunit 2	0.232678642099081	4.49500208967159	2.15027029698805	0.0379549437339297	0.633957325550475	-3.63530433085711
SLC9A7	10033	84679	solute carrier family 9 member A7	-0.41020002340549	4.8996733376941	-2.15019489170159	0.0379613129650572	0.633957325550475	-3.64229617556993
FANCF	4269	2188	FA complementation group F	-0.396507078485961	3.29738707241298	-2.15005728161207	0.037972938862894	0.633957325550475	-3.63672881166545
PNRC1	2992	10957	proline rich nuclear receptor coactivator 1	0.262449836180001	7.94889759359597	2.14971895746563	0.0380015353411714	0.633957325550475	-3.67631080695898
ADGRG3	3330	222487	adhesion G protein-coupled receptor G3	0.683098230418613	6.04399363535988	2.14854599116138	0.038100826526824	0.633957325550475	-3.67845425916428
AQP9	3235	366	aquaporin 9	0.501692551502368	9.82088249253885	2.1478563308748	0.0381593130336364	0.633957325550475	-3.65176638095141
NDUFB3	1103	4709	NADH:ubiquinone oxidoreductase subunit B3	0.431103665143369	4.17910456114387	2.14773780392551	0.0381693726765153	0.633957325550475	-3.63462742605756
GLT1D1	3478	144423	glycosyltransferase 1 domain containing 1	0.418713863166804	7.04027796346784	2.14757546883798	0.0381831542163992	0.633957325550475	-3.68603255644128
KRBOX4	4120	55634	KRAB box domain containing 4	-0.334548353917007	3.50120143228636	-2.14746987650622	0.0381921209050153	0.633957325550475	-3.6375823106201
C12orf4	4939	57102	chromosome 12 open reading frame 4	-0.177298895440677	4.54293760697991	-2.14742235105811	0.0381961572779211	0.633957325550475	-3.63967374375187
RTN3P1	711	152905	reticulon 3 pseudogene 1	0.457308384827462	3.13515841867724	2.14547998361281	0.0383614469941349	0.633957325550475	-3.64489210977505
NOC3L	4464	64318	NOC3 like DNA replication regulator	-0.329972439728175	4.88592891659281	-2.1452812046371	0.0383783981004667	0.633957325550475	-3.64946064929398
GPCPD1	7527	56261	glycerophosphocholine phosphodiesterase 1	0.342018933518816	8.53455086945747	2.14441947383981	0.0384519597591496	0.633957325550475	-3.67726454107381
HMGN3	1014	9324	high mobility group nucleosomal binding domain 3	-0.293893228229906	4.64051131050088	-2.14351864195391	0.0385289924576277	0.633957325550475	-3.64625433626087
NAMPT	9049	10135	nicotinamide phosphoribosyltransferase	0.460023829199715	11.1767151403215	2.14259823530934	0.0386078398489482	0.633957325550475	-3.64563688910182
SLC38A2	6602	54407	solute carrier family 38 member 2	0.282480467702058	8.38727850708917	2.14258915007776	0.0386086188527766	0.633957325550475	-3.68279954295706
KLF7	9262	8609	Kruppel like factor 7	0.278670243320057	6.68708100091765	2.1423738519675	0.0386270834317614	0.633957325550475	-3.69230117581055
NIPAL2	5599	79815	NIPA like domain containing 2	-0.295574180447956	4.09811350703029	-2.14194720704536	0.0386636967643133	0.633957325550475	-3.64140046822469
PCBP1	1750	5093	poly(rC) binding protein 1	0.33027313066524	6.68275151471859	2.1415591562976	0.0386970246859356	0.633957325550475	-3.69584472146863
EPN1	17616	29924	epsin 1	0.374402961617184	4.0460603607027	2.14025719333431	0.0388090298741787	0.633957325550475	-3.64894762376017
ADH5	4866	128	alcohol dehydrogenase 5 (class III), chi polypeptide	-0.3132568129165	4.88095480372252	-2.14019964147675	0.0388139875436266	0.633957325550475	-3.65790237175207
PAM	8846	5066	peptidylglycine alpha-amidating monooxygenase	0.709640035378554	5.39892079585643	2.14018947023639	0.0388148637793752	0.633957325550475	-3.67414021759717
NCOA1	8633	8648	nuclear receptor coactivator 1	0.213408365198406	8.57984850450746	2.13978524703249	0.0388497010959295	0.633957325550475	-3.68512766423522
SFT2D3	3735	84826	SFT2 domain containing 3	-0.307433672627813	3.63540962317887	-2.13967558772834	0.038859156664709	0.633957325550475	-3.64578373459011
ZBTB3	3348	79842	zinc finger and BTB domain containing 3	-0.50926078422761	1.7437618908438	-2.13944316536161	0.0388792044168453	0.633957325550475	-3.78904272970253
SNRPA1	3669	6627	small nuclear ribonucleoprotein polypeptide A'	-0.357806646208041	3.63726405530933	-2.13931429847328	0.0388903238554176	0.633957325550475	-3.64568151110296
PNPT1	5134	87178	polyribonucleotide nucleotidyltransferase 1	-0.363469344521902	4.77760990870014	-2.13804735053336	0.0389997936500404	0.634018996363186	-3.65954737017727
RPGRIP1	5470	57096	RPGR interacting protein 1	-0.666543557564437	3.65653632189423	-2.13802269492463	0.0390019266980009	0.634018996363186	-3.64846678712571
ANKFY1	14120	51479	ankyrin repeat and FYVE domain containing 1	-0.215394976521829	7.12249889194117	-2.13753341566609	0.0390442773695946	0.634018996363186	-3.70278988317735
SRSF2	3017	6427	serine and arginine rich splicing factor 2	-0.170583006224403	6.58708693705329	-2.13673186869809	0.0391137448312127	0.634072963419064	-3.70246408486129
TAF1B	4064	9014	TATA-box binding protein associated factor, RNA polymerase I subunit B	-0.277089314238122	4.13576599812698	-2.13634027281227	0.0391477228322839	0.634072963419064	-3.65046496743009
KLF13	9409	51621	Kruppel like factor 13	0.19777635370243	7.88775988664418	2.13458634420163	0.039300227697012	0.63432321165024	-3.7023954781777
KIF1B	17720	23095	kinesin family member 1B	0.491863020799283	7.02744298231931	2.13378294477061	0.0393702585864487	0.63432321165024	-3.70840787036057
CAPN5	6166	726	calpain 5	0.775328631465653	2.15964240292021	2.13332043369731	0.0394106247859833	0.63432321165024	-3.71217529301166
RNASE6	1061	6039	ribonuclease A family member k6	-0.410040198845828	5.48888581134971	-2.1325449802635	0.0394783853656494	0.63432321165024	-3.6835319299491
IFT80	7175	57560	intraflagellar transport 80	-0.277316033184674	4.41457504917776	-2.13216791371521	0.039511371287134	0.63432321165024	-3.66066245936869
ZNF415P1	1166	100419893	zinc finger protein 415 pseudogene 1	0.445900836545148	2.71950749093	2.13164953350869	0.0395567590820804	0.63432321165024	-3.68249173058769
NUDT13	2521	25961	nudix hydrolase 13	-0.640215101811386	0.976719745602136	-2.13129880388352	0.0395874939909476	0.63432321165024	-3.90238719707849
SORL1	19449	6653	sortilin related receptor 1	0.332871337432934	12.1667656947299	2.13116871583193	0.0395988991381454	0.63432321165024	-3.65782640862143
SF3B2	9795	10992	splicing factor 3b subunit 2	0.179747702664542	6.01389763802455	2.1288756476819	0.0398004147147377	0.63432321165024	-3.70759315885676
LINC00467	4448	84791	long intergenic non-protein coding RNA 467	-0.388861453918	1.60559714991541	-2.12834455310565	0.0398472163093185	0.63432321165024	-3.81126121527212
SCAPER	11610	49855	S-phase cyclin A associated protein in the ER	-0.262596102407613	5.60475167766304	-2.12793413049292	0.0398834171877279	0.63432321165024	-3.69735297225623
ZNF528	8530	84436	zinc finger protein 528	-0.414275590467714	4.0271527994121	-2.12712089480879	0.0399552334521147	0.63432321165024	-3.66291238724094
WDSUB1	2135	151525	WD repeat, sterile alpha motif and U-box domain containing 1	-0.283073816263939	2.88004525296632	-2.1270266843682	0.0399635604765597	0.63432321165024	-3.68698233405054
KDM5B	12092	10765	lysine demethylase 5B	0.180968292565219	6.02545223981387	2.12696351301516	0.0399691448911701	0.63432321165024	-3.71064440890919
SLC36A1	6980	206358	solute carrier family 36 member 1	0.387703558103238	5.06403639405586	2.12651664876888	0.0400086678223756	0.63432321165024	-3.69138352796968
PCGF3	7425	10336	polycomb group ring finger 3	0.37112596901123	5.44536364350759	2.12631181452422	0.0400267959155617	0.63432321165024	-3.70178415296413
SGK3	6007	23678	serum/glucocorticoid regulated kinase family member 3	-0.351116711703567	4.07195946222546	-2.12564947278039	0.040085463601073	0.63432321165024	-3.6657236143903
CSRP1	10318	1465	cysteine and glycine rich protein 1	-0.233526951485221	4.38373734159277	-2.12450709125808	0.0401868295640768	0.63432321165024	-3.67245443013241
ACTL6A	3675	86	actin like 6A	-0.317032694697804	4.3222536801366	-2.12430381922129	0.0402048899955285	0.63432321165024	-3.67084085998388
CDHR2	5348	54825	cadherin related family member 2	0.834781505799814	0.199446882226217	2.12402336305337	0.0402298198757488	0.63432321165024	-3.97725661870269
GRSF1	7785	2926	G-rich RNA sequence binding factor 1	-0.211770104047598	5.99976187805426	-2.12394376017906	0.04023689829538	0.63432321165024	-3.71355889484485
DGCR2	5605	9993	DiGeorge syndrome critical region gene 2	0.37492535952723	6.03088817061604	2.1229023889779	0.0403295999463075	0.63432321165024	-3.72329000488951
CLIP1	16293	6249	CAP-Gly domain containing linker protein 1	0.281031516215327	7.22146703750741	2.12254738929295	0.0403612446106203	0.63432321165024	-3.72610412110014
PYGL	4798	5836	glycogen phosphorylase L	0.587514242710197	9.19605256260785	2.12093317425912	0.040505411915719	0.63432321165024	-3.70446940523861
ERAP1	7945	51752	endoplasmic reticulum aminopeptidase 1	-0.213978002528742	7.31721654444892	-2.12073494967443	0.0405231468233548	0.63432321165024	-3.72960383802167
KCTD7	8506	154881	potassium channel tetramerization domain containing 7	-0.357962726430396	4.63862286406096	-2.12037889780605	0.0405550195298503	0.63432321165024	-3.68426583183737
UBE2B	3291	7320	ubiquitin conjugating enzyme E2 B	0.286503680257952	7.17182213351174	2.11931226835364	0.0406506333042958	0.63432321165024	-3.7329354841646
IL3RA	1710	3563	interleukin 3 receptor subunit alpha	-0.85492784465157	2.79784689226729	-2.11894710861147	0.0406834122194446	0.63432321165024	-3.7081208473941
LINC00324	2082	284029	long intergenic non-protein coding RNA 324	-0.237519445385161	3.72567420985711	-2.11890594666862	0.0406871086211389	0.63432321165024	-3.67480344699745
THAP9	4332	79725	THAP domain containing 9	-0.326214284501804	2.57942834515528	-2.11849487321087	0.0407240398480801	0.63432321165024	-3.72398194739869
CSTB	2490	1476	cystatin B	0.274692395589209	3.86114966683836	2.11833806158134	0.0407381357339863	0.63432321165024	-3.67590496244699
ADPRH	4615	141	ADP-ribosylarginine hydrolase	-0.461671932279615	3.23345675456612	-2.11796877246524	0.0407713483259609	0.63432321165024	-3.68440702799396
ZNF282	3832	8427	zinc finger protein 282	0.420379895834825	3.20738771863645	2.11589916668074	0.0409579234195851	0.63432321165024	-3.68127658560918
PAIP1	3391	10605	poly(A) binding protein interacting protein 1	-0.290604634476513	3.13663260358738	-2.1148279480968	0.04105478892131	0.63432321165024	-3.69067157163868
STAT1	6053	6772	signal transducer and activator of transcription 1	-0.442925038581581	9.58668206540046	-2.11436974108799	0.0410962841077638	0.63432321165024	-3.71082858261845
SNRNP40	3881	9410	small nuclear ribonucleoprotein U5 subunit 40	-0.25783144588654	4.68116054852517	-2.11425653717039	0.0411065415333284	0.63432321165024	-3.695308992059
WDR73	9626	84942	WD repeat domain 73	-0.189152400078541	4.85626307439093	-2.11376815284051	0.0411508199704479	0.63432321165024	-3.70072338288648
LINC00426	3972	100188949	long intergenic non-protein coding RNA 426	-0.443053944401213	3.56727384362995	-2.11294224286368	0.041225795115189	0.63432321165024	-3.68436180162886
PSMG2	3356	56984	proteasome assembly chaperone 2	-0.262164698690257	4.76665904631252	-2.11277712283773	0.0412407989395289	0.63432321165024	-3.69992733489838
SNAPC3	6684	6619	small nuclear RNA activating complex polypeptide 3	-0.205199473060658	5.93469717341526	-2.11270451982827	0.04124739761878	0.63432321165024	-3.72979536135571
C5orf24	5741	134553	chromosome 5 open reading frame 24	-0.194788020647229	5.10431568061299	-2.11235934777558	0.0412787820355744	0.63432321165024	-3.70673325061945
ARHGEF11	8950	9826	Rho guanine nucleotide exchange factor 11	0.310908615922192	5.58109814578801	2.11191828142262	0.0413189161445693	0.63432321165024	-3.729375792139
TMPRSS9	4195	360200	transmembrane serine protease 9	0.978526779743911	0.199468889176051	2.11138954706156	0.0413670727386239	0.63432321165024	-3.94166549373755
RAB11FIP4	15383	84440	RAB11 family interacting protein 4	0.232221013453378	6.85905825141464	2.11078242841659	0.0414224294376659	0.63432321165024	-3.74851409858176
FBXO11	7074	80204	F-box protein 11	0.174805086954889	7.1672085064538	2.1106479625642	0.0414346987685498	0.63432321165024	-3.74580894882974
IQCB1	3049	9657	IQ motif containing B1	-0.269542841558366	4.70934454164383	-2.11004867791554	0.0414894193841072	0.63432321165024	-3.70078747804722
MRPL27	3027	51264	mitochondrial ribosomal protein L27	-0.249846736686877	3.58787382220272	-2.10792220350784	0.0416841012372504	0.63432321165024	-3.6916636890832
DCAF4L1	4772	285429	DDB1 and CUL4 associated factor 4 like 1	0.561244097234896	1.57338114864262	2.10767362519642	0.041706911352182	0.63432321165024	-3.82963722440528
SUGT1P2	992	728706	SUGT1 pseudogene 2	-0.393593976973764	2.12207353837228	-2.10744443982066	0.0417279516595802	0.63432321165024	-3.78778656510737
SLC15A4	5496	121260	solute carrier family 15 member 4	0.314969683611708	7.14279683515989	2.10675171616248	0.0417916037850296	0.63432321165024	-3.7542202897715
KLHL2	3872	11275	kelch like family member 2	0.628774433350208	7.00388811905773	2.10650292318562	0.0418144854091951	0.63432321165024	-3.75283430159827
RAC1P2	579	442775	Rac family small GTPase 1 pseudogene 2	0.254054710429784	5.61813040656446	2.10431069629476	0.0420165827045853	0.63432321165024	-3.73971620554252
RLIM	8379	51132	ring finger protein, LIM domain interacting	0.195001181910706	7.83473731794358	2.10430110461683	0.0420174688283651	0.63432321165024	-3.75316761517468
PUM3	2707	9933	pumilio RNA binding family member 3	-0.233331623998527	5.14474509151954	-2.10368008715501	0.0420748763117276	0.63432321165024	-3.72000959364356
CRAT	3803	1384	carnitine O-acetyltransferase	0.59747682943736	2.33497365158978	2.10306757096564	0.0421315655070677	0.63432321165024	-3.73521910811178
PPP1R18	4599	170954	protein phosphatase 1 regulatory subunit 18	0.256998876082926	6.22291664475222	2.10232711148579	0.0422001857219359	0.63432321165024	-3.75785223806111
HNRNPA1P8	951	402562	heterogeneous nuclear ribonucleoprotein A1 pseudogene 8	-0.413647955199637	2.6944233940375	-2.10109637450918	0.042314458668016	0.63432321165024	-3.75112019445033
PPP1R21	3995	129285	protein phosphatase 1 regulatory subunit 21	0.184731297132164	6.24724008508667	2.10067812341089	0.0423533548583329	0.63432321165024	-3.75851591742104
MAP1LC3B	5313	81631	microtubule associated protein 1 light chain 3 beta	0.299947515126178	6.32623351273049	2.10047459735701	0.0423722935863762	0.63432321165024	-3.7603385150536
MAP3K3	6107	4215	mitogen-activated protein kinase kinase kinase 3	0.301189066798305	6.54302204044765	2.10027264144164	0.0423910935691352	0.63432321165024	-3.76417970603018
VPS33A	7542	65082	VPS33A core subunit of CORVET and HOPS complexes	-0.234398799856244	4.50756276191989	-2.10021965236036	0.0423960275128286	0.63432321165024	-3.71313109305884
PRELID1P1	903	728666	PRELI domain containing 1 pseudogene 1	0.454073761495813	1.90761203254563	2.10011029312626	0.0424062118166972	0.63432321165024	-3.78013668324481
ZNF100	6612	163227	zinc finger protein 100	-0.359192115089266	5.25382916874792	-2.10003406505434	0.0424133119852179	0.63432321165024	-3.73163668242204
ASAP1-IT2	2031	100507117	ASAP1 intronic transcript 2	0.520193094370752	1.84652425927386	2.09999952047374	0.0424165299412151	0.63432321165024	-3.80527520884651
PTTG2	691	10744	pituitary tumor-transforming 2	0.447458872656801	2.61310598217403	2.09844237398835	0.0425618070502021	0.63432321165024	-3.73490674152581
OS9	5169	10956	OS9 endoplasmic reticulum lectin	0.223089127233472	7.08624278673951	2.09776581266372	0.0426250644091909	0.63432321165024	-3.7678491682485
PTOV1-AS1	4203	100506033	PTOV1 antisense RNA 1	-0.666808333796146	0.569792744051181	-2.09755270917535	0.0426450063409006	0.63432321165024	-4.02634896236092
TSPAN17	5215	26262	tetraspanin 17	0.341673223739185	3.99152379973332	2.09741799417661	0.0426576170162841	0.63432321165024	-3.71201164882779
HCFC2	6773	29915	host cell factor C2	-0.203404685957439	5.07348066033263	-2.09653052453311	0.0427407750416512	0.63432321165024	-3.73085253757967
ACSL1	6284	2180	acyl-CoA synthetase long chain family member 1	0.666853536349123	10.5538756746387	2.09610868491928	0.0427803523613135	0.63432321165024	-3.72309250636098
HS2ST1	7429	9653	heparan sulfate 2-O-sulfotransferase 1	0.238948953896177	5.09283618995276	2.09588049955053	0.0428017743117565	0.63432321165024	-3.73890668144537
IL18	2628	3606	interleukin 18	-0.419786006634053	3.01536992393382	-2.09567827017893	0.0428207674036978	0.63432321165024	-3.7273014767085
CAMKK2	6931	10645	calcium/calmodulin dependent protein kinase kinase 2	0.422516428085995	6.93108475072836	2.09547376768165	0.042839981516968	0.63432321165024	-3.77252410130362
SIPA1L2	7641	57568	signal induced proliferation associated 1 like 2	0.746156694930832	6.90599113597192	2.0951634585634	0.0428691512057954	0.63432321165024	-3.77251554858598
ZNF561	6467	93134	zinc finger protein 561	-0.20494926533374	4.40454171760944	-2.09349177934628	0.0430265929558728	0.635128682930701	-3.71955021775239
RPS3A	2341	6189	ribosomal protein S3A	-0.24682886770504	5.16330732378525	-2.09309629445008	0.0430639146719355	0.635128682930701	-3.74300874606302
DGAT2	7905	84649	diacylglycerol O-acyltransferase 2	0.488516414916216	7.1683805388709	2.09298926260885	0.0430740201040165	0.635128682930701	-3.7754632268906
WDR61	7279	80349	WD repeat domain 61	-0.290877272589725	4.37622068764536	-2.09092208636056	0.0432696020847927	0.635858409667889	-3.72315100134905
HBM	916	3042	hemoglobin subunit mu	1.02516545015068	1.4940273625227	2.09065646726896	0.0432947896106429	0.635858409667889	-3.81611129445359
TRAV8-6	561	28680	T cell receptor alpha variable 8-6	-0.817331245970887	0.663566792940042	-2.09031955245925	0.0433267563335593	0.635858409667889	-3.98853160713652
THYN1	2119	29087	thymocyte nuclear protein 1	-0.231384233780342	4.5629726827944	-2.09016475680626	0.0433414504077562	0.635858409667889	-3.72664497829591
DOK4	4788	55715	docking protein 4	1.24056238018731	1.27321961411942	2.08942918317787	0.0434113350315997	0.635858409667889	-3.8647064033476
SPATA7	6872	55812	spermatogenesis associated 7	-0.573841437673774	2.61670133426076	-2.0882602076351	0.0435225994845754	0.635858409667889	-3.7576337858274
ARMCX5	4911	64860	armadillo repeat containing X-linked 5	-0.350599367893305	3.50580835129229	-2.08801315089975	0.0435461466642619	0.635858409667889	-3.72116956624868
TNPO1	11977	3842	transportin 1	0.192562508332934	8.11315227330748	2.08799231569359	0.0435481329962552	0.635858409667889	-3.77666808556846
MORF4L1P1	967	326591	mortality factor 4 like 1 pseudogene 1	0.169719649605621	6.0140091836444	2.08732783072556	0.0436115236601752	0.635858409667889	-3.77125986174527
HEIH	1652	100859930	hepatocellular carcinoma up-regulated EZH2-associated long non-coding RNA	-0.221362399948253	4.0473156508467	-2.08709735959187	0.0436335291070149	0.635858409667889	-3.72394260379724
TMEM41A	8668	90407	transmembrane protein 41A	-0.294255200690205	3.89820845062481	-2.08665564280681	0.0436757315972733	0.635858409667889	-3.72240308344746
NUDT17	1657	200035	nudix hydrolase 17	-0.562387335296682	1.15987619796448	-2.08576245053919	0.0437611784625381	0.636370937320905	-3.92263745175552
PPM1K	11371	152926	protein phosphatase, Mg2+/Mn2+ dependent 1K	-0.351576450701676	6.44061178319327	-2.0838738666638	0.0439423324121592	0.637548917527784	-3.78691876176983
SP1	8083	6667	Sp1 transcription factor	0.219329832767302	8.28802721427887	2.08319962282817	0.0440071654972567	0.637548917527784	-3.78194423528097
DCAF13	9199	25879	DDB1 and CUL4 associated factor 13	-0.258220143881938	4.59614922024743	-2.08310246028406	0.0440165152478002	0.637548917527784	-3.7398987730527
PRKCD	3396	5580	protein kinase C delta	0.35376757115564	6.83406707545691	2.08279184180316	0.0440464171183072	0.637548917527784	-3.79260372876028
ADPRM	1620	56985	ADP-ribose/CDP-alcohol diphosphatase, manganese dependent	-0.336889125994071	4.01183235128043	-2.08229937090972	0.044093861657535	0.637548917527784	-3.72939934058402
PRKACA	6144	5566	protein kinase cAMP-activated catalytic subunit alpha	0.335198396611581	4.30587722621736	2.08092040313934	0.0442269498028243	0.637658598465327	-3.74173624989663
TUBE1	6973	51175	tubulin epsilon 1	-0.378204191227417	3.96759167611879	-2.07917421333466	0.0443959852761517	0.637658598465327	-3.73357948430357
SMARCA2	17300	6595	SWI/SNF related, matrix associated, actin dependent regulator of chromatin, subfamily a, member 2	0.136580663401528	7.99611097685766	2.07892695031799	0.0444199666982235	0.637658598465327	-3.79373366568352
CNOT7P1	852	100421338	CCR4-NOT transcription complex subunit 7 pseudogene 1	-0.344539412731316	2.38710873067027	-2.07742448676059	0.0445659313428409	0.637658598465327	-3.79921998639837
GTF2IP13	10334	101929008	general transcription factor IIi pseudogene 13	-0.684113551348178	0.400509692583945	-2.07725335487031	0.0445825835000067	0.637658598465327	-4.05465255592185
RDH14	1587	57665	retinol dehydrogenase 14	-0.37622308495065	3.08903219902026	-2.07703055277124	0.0446042716552458	0.637658598465327	-3.74613308673391
KLRC2	1499	3822	killer cell lectin like receptor C2	1.19503200607833	1.08170653959901	2.07696209969257	0.0446109369199396	0.637658598465327	-3.89464032149659
ROCK1P1	2645	727758	Rho associated coiled-coil containing protein kinase 1 pseudogene 1	0.488040911501749	1.51461555007477	2.07637878069312	0.0446677700390182	0.637658598465327	-3.87738475884202
C11orf21	4199	29125	chromosome 11 open reading frame 21	-0.297928165972926	5.82828219900907	-2.07629637860677	0.0446758036400262	0.637658598465327	-3.79146167602611
BNC2	15323	54796	basonuclin 2	0.901711373680143	1.02790068213501	2.07569759475977	0.0447342187550103	0.637658598465327	-3.95656950284426
QTRT2	8054	79691	queuine tRNA-ribosyltransferase accessory subunit 2	-0.224798555383134	4.9818341604863	-2.07564673937577	0.0447391831007988	0.637658598465327	-3.76344689108488
RNA5-8S5	1224	110255170	RNA, 5.8S ribosomal 5	-0.725727788467272	-0.740447084087306	-2.07479669394315	0.044822233468558	0.637658598465327	-3.97123754911715
SSH2	12608	85464	slingshot protein phosphatase 2	0.325834608816123	9.45202362386766	2.07476673005937	0.0448251634376716	0.637658598465327	-3.77552350231862
DHX57	7985	90957	DExH-box helicase 57	-0.313174841909611	5.06036818106636	-2.07226664031205	0.0450702229161521	0.637658598465327	-3.7687901262647
PTMAP5	1162	150928	prothymosin alpha pseudogene 5	-0.287025933509411	4.92092027615271	-2.07216435661811	0.045080273750524	0.637658598465327	-3.76720067893026
GPM6A	7040	2823	glycoprotein M6A	-1.35929034843305	0.0602020682302511	-2.07033320958379	0.0452605428306471	0.637658598465327	-4.0482494409964
PCNX1	16715	22990	pecanex 1	0.339311787613008	9.5212982886022	2.069983644499	0.0452950278339386	0.637658598465327	-3.78193759918095
C9orf72	6062	203228	C9orf72-SMCR8 complex subunit	0.375492128718847	7.99215909440998	2.06993820505323	0.0452995121789234	0.637658598465327	-3.80723994765787
GALT	4407	2592	galactose-1-phosphate uridylyltransferase	-0.389294340500393	4.94818587620561	-2.06973537163127	0.045319534224242	0.637658598465327	-3.77401005376411
NARF	7962	26502	nuclear prelamin A recognition factor	0.359736403798838	5.7900391233706	2.0695120051697	0.0453415920941817	0.637658598465327	-3.80452898514082
SAMD9L	7135	219285	sterile alpha motif domain containing 9 like	-0.552695640859499	8.80667386079404	-2.06920479407183	0.0453719451516727	0.637658598465327	-3.79671078208784
KANK2	7638	25959	KN motif and ankyrin repeat domains 2	0.71202875230155	3.27355693057789	2.06888422363169	0.0454036371202442	0.637658598465327	-3.74756647070363
TRIB1	4138	10221	tribbles pseudokinase 1	0.464308020694255	5.401541888023	2.06877328575325	0.0454146090855283	0.637658598465327	-3.78795985444983
PUM2	6978	23369	pumilio RNA binding family member 2	0.13781011507446	8.25718330270356	2.06851603340362	0.0454400607681548	0.637658598465327	-3.80696630710299
EBNA1BP2	3561	10969	EBNA1 binding protein 2	-0.277752208173578	3.82413246852117	-2.06743452697289	0.0455471981432296	0.637658598465327	-3.74942897429605
PPP1R9A	11151	55607	protein phosphatase 1 regulatory subunit 9A	-0.569567407078802	1.55055595640828	-2.06691584171283	0.0455986591851473	0.637658598465327	-3.89769282432918
CCDC71L	4232	168455	coiled-coil domain containing 71 like	0.419646748896399	5.00949341084351	2.06688018422389	0.0456021987916075	0.637658598465327	-3.78716675708346
MYNN	5730	55892	myoneurin	-0.127187113524738	5.51102108617135	-2.06681824055224	0.0456083483167825	0.637658598465327	-3.79393943766873
PYROXD1	5725	79912	pyridine nucleotide-disulphide oxidoreductase domain 1	-0.228462187503654	4.66966508324085	-2.06632694525601	0.0456571479255956	0.637658598465327	-3.76714506648345
MCOLN1	3956	57192	mucolipin 1	0.444371979716214	3.3104836250486	2.06581667024781	0.0457078811770414	0.637658598465327	-3.75164745322467
KIT	5563	3815	KIT proto-oncogene, receptor tyrosine kinase	-0.712932337237515	2.00791678938797	-2.06536342761882	0.0457529854802809	0.637658598465327	-3.84316794255557
AGO2	15833	27161	argonaute RISC catalytic component 2	0.325537274756505	7.70838247073269	2.06530649954341	0.045758653415351	0.637658598465327	-3.81842638430165
DGCR11	2214	25786	DiGeorge syndrome critical region gene 11	0.371314704970834	2.93626817714648	2.0652648229748	0.0457628032531961	0.637658598465327	-3.75880894692005
ZFAND3	4036	60685	zinc finger AN1-type containing 3	0.293639560454088	5.94094322452181	2.06319210359029	0.0459696052670689	0.63859325799936	-3.81781154438353
TRA2B	11769	6434	transformer 2 beta homolog	-0.158709470487879	7.66877908894587	-2.06298757150708	0.0459900563973194	0.63859325799936	-3.82311452643335
CDKN1A	3050	1026	cyclin dependent kinase inhibitor 1A	0.492715929153182	2.88463035329046	2.06234975788921	0.0460538824457437	0.63859325799936	-3.76324513883523
PTPRO	7519	5800	protein tyrosine phosphatase receptor type O	-0.448621538829288	3.67763586081636	-2.06167950212398	0.0461210385437916	0.63859325799936	-3.75754542502237
ATP7B	9671	540	ATPase copper transporting beta	0.482240922401028	2.49871138836308	2.06150494416787	0.046138542397511	0.63859325799936	-3.78008230392235
CEP57	7101	9702	centrosomal protein 57	-0.173958937865725	6.21822173975307	-2.06137450143977	0.0461516263795453	0.63859325799936	-3.819349440772
INSIG1	3650	3638	insulin induced gene 1	0.243942839803352	5.76494059968744	2.06106377919753	0.0461828062788105	0.63859325799936	-3.81466393333051
COPS4	3566	51138	COP9 signalosome subunit 4	-0.246950663547098	4.32752339852342	-2.05989395666664	0.046300359377333	0.639497377511952	-3.76895293009171
MNAT1	3865	4331	MNAT1 component of CDK activating kinase	-0.255329920012801	3.49489881269044	-2.05936484494822	0.046353614709578	0.639497377511952	-3.76129246295188
DOK3	4821	79930	docking protein 3	0.550130937910914	5.56820850984197	2.05886337812214	0.0464041370488444	0.639497377511952	-3.82272370918651
IGLV1-44	467	28823	immunoglobulin lambda variable 1-44	1.18191897496167	0.586849074349365	2.05840709533221	0.0464501490060789	0.639497377511952	-3.91957248029715
SCAF8	5481	22828	SR-related CTD associated factor 8	0.124487078991743	7.14965137161672	2.0570040484401	0.046591883727993	0.640649910414959	-3.83446380761144
PACSIN2	4554	11252	protein kinase C and casein kinase substrate in neurons 2	0.320871510251182	7.56817194548706	2.05637232879077	0.0466558230194895	0.640649910414959	-3.8342828333956
FGF13	20627	2258	fibroblast growth factor 13	1.28530784616731	1.08573708754283	2.05596363360904	0.0466972298544996	0.640649910414959	-3.9560254027839
SNRPD2	1608	6633	small nuclear ribonucleoprotein D2 polypeptide	-0.360522133870847	4.46134819452973	-2.05543550454598	0.0467507847146769	0.640649910414959	-3.78120034103356
SLC6A8	5498	6535	solute carrier family 6 member 8	0.844742684352607	4.96437156341493	2.05502608135401	0.0467923391882023	0.640649910414959	-3.81114317184945
RGS3	13793	5998	regulator of G protein signaling 3	0.396280386254386	5.05506419671341	2.05458300775668	0.0468373454164102	0.640649910414959	-3.80875178410533
AP4S1	7223	11154	adaptor related protein complex 4 subunit sigma 1	-0.334315486701214	3.63855883904021	-2.05372618701339	0.0469244863990765	0.641149454941427	-3.76878182071211
RPL34P33	334	730061	ribosomal protein L34 pseudogene 33	-0.484875493806639	2.06949598523775	-2.05318757833263	0.0469793369171169	0.641207199776081	-3.8251331173991
ZNF292	13128	23036	zinc finger protein 292	0.155618150505559	8.47371972792632	2.05152453990733	0.0471490504887992	0.641512121697407	-3.83105078637552
AP4E1	7359	23431	adaptor related protein complex 4 subunit epsilon 1	-0.162906287002734	5.21456314163306	-2.04993768458894	0.0473114891521441	0.641512121697407	-3.81330352429091
GGCT	1597	79017	gamma-glutamylcyclotransferase	-0.31092749662312	2.40897516753089	-2.04950972557067	0.0473553809224129	0.641512121697407	-3.81872218207066
NVL	4813	4931	nuclear VCP like	-0.229671457195396	4.73705358468063	-2.04921160438685	0.0473859774682484	0.641512121697407	-3.79566103634067
ATR	12496	545	ATR serine/threonine kinase	-0.229840469366244	6.85283828733848	-2.04841922348223	0.04746738452624	0.641512121697407	-3.84873838380508
ZRSR2	2077	8233	zinc finger CCCH-type, RNA binding motif and serine/arginine rich 2	-0.327901476093327	3.95033234663507	-2.04825026327121	0.0474847588433051	0.641512121697407	-3.77805929277951
FDX1	3206	2230	ferredoxin 1	-0.332122447456059	3.16443114379946	-2.0473977833474	0.0475725048571185	0.641512121697407	-3.78139700966271
PLPP6	2944	403313	phospholipid phosphatase 6	-0.367402129010425	3.34380930452636	-2.04651496260137	0.0476635232025463	0.641512121697407	-3.78010753769973
MFSD8	5023	256471	major facilitator superfamily domain containing 8	-0.204425054030649	5.21289681047539	-2.04645326138507	0.047669890251157	0.641512121697407	-3.81734416770724
RAD23B	4615	5887	RAD23 homolog B, nucleotide excision repair protein	0.276518324051493	7.34787886712668	2.04483290826493	0.0478373633937621	0.641512121697407	-3.85351001562618
FIG4	3592	9896	FIG4 phosphoinositide 5-phosphatase	-0.180006484836198	5.56398754027131	-2.04476863091837	0.0478440174284573	0.641512121697407	-3.83323661112929
MEF2C-AS1	7457	101929423	MEF2C antisense RNA 1	-0.398371855450597	2.70281257062752	-2.0447242389748	0.0478486133848051	0.641512121697407	-3.80506573360004
ARHGAP26-IT1	388	100874372	ARHGAP26 intronic transcript 1	0.386853511083961	3.34015361881877	2.04402626354741	0.0479209264300266	0.641512121697407	-3.78269034019647
CYFIP2	10498	26999	cytoplasmic FMR1 interacting protein 2	0.192917632547911	8.15004707353831	2.04391020478288	0.0479329598358455	0.641512121697407	-3.84837622688191
TTC5	9705	91875	tetratricopeptide repeat domain 5	-0.292352948811055	4.26299362929596	-2.04338065395956	0.0479878991507163	0.641512121697407	-3.79136611663639
HSH2D	3398	84941	hematopoietic SH2 domain containing	-0.37968722386288	5.70844588752713	-2.04288177014429	0.04803970717187	0.641512121697407	-3.84382799565772
NSMCE4A	3546	54780	NSE4 homolog A, SMC5-SMC6 complex component	-0.275931420184223	4.59592295568334	-2.04284681535555	0.0480433389831746	0.641512121697407	-3.80378665041798
STK40	5590	83931	serine/threonine kinase 40	0.291811171491247	5.96457414027024	2.04269043923074	0.0480595894384852	0.641512121697407	-3.8536603283275
UBE2G1	4539	7326	ubiquitin conjugating enzyme E2 G1	0.185129575892641	5.91147337178815	2.04178811344347	0.0481534520784576	0.641512121697407	-3.84630091701661
SMYD2	4889	56950	SET and MYND domain containing 2	-0.281986400581529	4.52622281034402	-2.04168513090223	0.0481641748052985	0.641512121697407	-3.80075484464129
VNN2	2633	8875	vanin 2	0.499718185859138	10.415169753215	2.04106015586177	0.0482292930701912	0.641512121697407	-3.81206968549596
GPR107	9139	57720	G protein-coupled receptor 107	0.199227273010214	5.81013628934031	2.04057685208902	0.0482797028356485	0.641512121697407	-3.84870738105633
FAM161B	5056	145483	FAM161 centrosomal protein B	-0.412598045979111	2.03924815670016	-2.04049528535517	0.0482882149821557	0.641512121697407	-3.86193544025486
DDX56	4068	54606	DEAD-box helicase 56	-0.288308664441745	4.74639996124673	-2.03982999472312	0.0483576923795695	0.641512121697407	-3.81434924449673
CHID1	5984	66005	chitinase domain containing 1	0.421167960706507	3.19691741524182	2.03906199111348	0.0484380047974062	0.641512121697407	-3.78937042639216
GTF2IRD2B	5672	389524	GTF2I repeat domain containing 2B	-0.354859360760998	1.9528851150555	-2.03903957898818	0.0484403502478246	0.641512121697407	-3.86935243890709
PAPOLA	12766	10914	poly(A) polymerase alpha	0.13301524695297	8.8626496935749	2.03892118777341	0.0484527416476162	0.641512121697407	-3.84451851902272
SCAMP1-AS1	1792	728769	SCAMP1 antisense RNA 1	-0.45427586247908	1.99011817923452	-2.03765499567185	0.0485854406479276	0.641512121697407	-3.86385494153043
RPA3	3232	6119	replication protein A3	-0.398817795161057	2.62814093389891	-2.03689071455883	0.0486656920186101	0.641512121697407	-3.81229548685987
ZNF319	4274	57567	zinc finger protein 319	0.423534319914114	2.89614783843385	2.03599104400295	0.0487603078631639	0.641512121697407	-3.79626057654416
EIF4A2	6133	1974	eukaryotic translation initiation factor 4A2	-0.178489749283059	8.34381258098514	-2.03575102790285	0.0487855768029388	0.641512121697407	-3.85972645599897
TMEM116	7989	89894	transmembrane protein 116	-0.333352023888459	4.14123887259281	-2.0354096062836	0.0488215414274295	0.641512121697407	-3.80158727134354
NDUFA5	9851	4698	NADH:ubiquinone oxidoreductase subunit A5	-0.201381354767861	5.29564196986249	-2.03539217006551	0.0488233787423118	0.641512121697407	-3.83789698097967
SIRPB1	6091	10326	signal regulatory protein beta 1	0.342200186668966	5.80015819096904	2.03306948252167	0.0490686684674436	0.641512121697407	-3.86292398573037
CXorf56	2580	63932	chromosome X open reading frame 56	-0.320375544429895	3.51278848380311	-2.03285614929239	0.0490912515595783	0.641512121697407	-3.79808011008823
PLEKHM2	4122	23207	pleckstrin homology and RUN domain containing M2	0.259611429733717	4.62848731216342	2.03275918316329	0.049101519226122	0.641512121697407	-3.82922583171755
N4BP2L1	6053	90634	NEDD4 binding protein 2 like 1	-0.206445769365457	5.37586874255048	-2.03265958356808	0.0491120676989986	0.641512121697407	-3.84399638813865
EVI2B	2072	2124	ecotropic viral integration site 2B	0.276962484989315	8.25392388038045	2.03247308279838	0.0491318250878199	0.641512121697407	-3.86379253807066
METTL15	7778	196074	methyltransferase like 15	-0.189014029748882	4.0602033950082	-2.03245090239337	0.0491341752814834	0.641512121697407	-3.80494801737369
HAX1	2155	10456	HCLS1 associated protein X-1	-0.217042685197886	5.11546513238233	-2.03132905721433	0.0492531718749532	0.641512121697407	-3.83596815031725
SDCBP	4778	6386	syndecan binding protein	0.334120413706794	9.31714884916934	2.03052494246265	0.0493386207128904	0.641512121697407	-3.84740287554743
IP6K1	5200	9807	inositol hexakisphosphate kinase 1	0.219585602692157	5.20093629295622	2.0304494686917	0.0493466475282239	0.641512121697407	-3.85152380914036
ATP11A	13733	23250	ATPase phospholipid transporting 11A	0.321362745449416	7.12643471859361	2.02994360606927	0.0494004766311906	0.641512121697407	-3.87997601569981
GBP1P1	2352	400759	guanylate binding protein 1 pseudogene 1	-1.00089475866049	2.8074019772936	-2.02844529276505	0.0495602135250249	0.641512121697407	-3.8219542540375
DNAJC3	5591	5611	DnaJ heat shock protein family (Hsp40) member C3	0.315323797718402	7.82605868788686	2.0276274721838	0.0496475921920361	0.641512121697407	-3.87779336720162
MRPS35	1979	60488	mitochondrial ribosomal protein S35	-0.258248574016548	4.46075023155685	-2.02622389626519	0.049797868029517	0.641512121697407	-3.82308952524611
EXT1	8325	2131	exostosin glycosyltransferase 1	0.426319556823352	4.88348506394819	2.02594629804739	0.0498276364013998	0.641512121697407	-3.84284858738129
SLC50A1	2340	55974	solute carrier family 50 member 1	-0.237615912101478	3.67747672249489	-2.02517960055716	0.0499099341626789	0.641512121697407	-3.80972365383033
AK6	2162	102157402	adenylate kinase 6	-0.363894894293979	2.41356804246501	-2.02486649996499	0.0499435766241404	0.641512121697407	-3.84613383242364
EIF4A1	5316	1973	eukaryotic translation initiation factor 4A1	-0.340294818620436	4.03755613075904	-2.02422562984215	0.0500124993576218	0.641512121697407	-3.81709227303138
UBR5	13085	51366	ubiquitin protein ligase E3 component n-recognin 5	0.107325270760844	8.42504895936435	2.02341617169637	0.0500996714547237	0.641512121697407	-3.87688398251564
C12orf45	25887	121053	chromosome 12 open reading frame 45	-0.315094592788111	4.21712078524281	-2.02335039917866	0.0501067604366164	0.641512121697407	-3.81919741470515
ISY1	4102	57461	ISY1 splicing factor homolog	0.242180343988471	3.95789182643962	2.02321443296267	0.0501214176880663	0.641512121697407	-3.81889169739663
LRRC45	3606	201255	leucine rich repeat containing 45	-0.49148321991388	2.28255839389057	-2.02314536421913	0.0501288647771124	0.641512121697407	-3.84224939579985
SP140L	5650	93349	SP140 nuclear body protein like	-0.185123782382543	5.91724308915518	-2.02283268938999	0.0501625898817762	0.641512121697407	-3.87488603003566
DNAJC19P9	351	644589	DnaJ heat shock protein family (Hsp40) member C19 pseudogene 9	-0.524502301340861	0.895636341761938	-2.02244190145608	0.0502047680629399	0.641512121697407	-4.03512379873353
PPDPF	1094	79144	pancreatic progenitor cell differentiation and proliferation factor	0.979594276065227	2.41896698904589	2.02241467585616	0.0502077077037521	0.641512121697407	-3.82202092044279
PAWR	11668	5074	pro-apoptotic WT1 regulator	-0.502723895003565	3.16175767724452	-2.02102309200608	0.0503581616495317	0.641512121697407	-3.8174612219743
EGLN1	7265	54583	egl-9 family hypoxia inducible factor 1	0.319427639952487	7.97130444814951	2.02052637003372	0.0504119608179846	0.641512121697407	-3.88700197217278
TAF12	2337	6883	TATA-box binding protein associated factor 12	0.192091254863874	5.02095380998229	2.01974859361932	0.0504963011335375	0.641512121697407	-3.85177611372529
EPB41L4A-AS1	3344	114915	EPB41L4A antisense RNA 1	-0.358863849034225	3.54343027460123	-2.01895907060016	0.0505820409149671	0.641512121697407	-3.81730255081016
MCCC1	4321	56922	methylcrotonoyl-CoA carboxylase 1	-0.214084313043584	4.44727019420234	-2.0188299920005	0.0505960705094431	0.641512121697407	-3.83291906219706
PTPN12	5547	5782	protein tyrosine phosphatase non-receptor type 12	0.273427236350465	7.29614366860475	2.01848958951161	0.0506330852218385	0.641512121697407	-3.89578239126221
IGF2R	14911	3482	insulin like growth factor 2 receptor	0.378235716508733	10.8251278037246	2.01845370519113	0.050636988587755	0.641512121697407	-3.84042196857998
FRAT2	2213	23401	FRAT regulator of WNT signaling pathway 2	0.366273694033843	8.19425798249702	2.01770359210414	0.0507186431842787	0.641512121697407	-3.88849245892362
F5	7158	2153	coagulation factor V	0.674043301236821	6.82809870925537	2.01727669759105	0.0507651645588773	0.641512121697407	-3.89804025255839
PLB1	8238	151056	phospholipase B1	0.546881504309936	5.64039390765621	2.01712990098044	0.0507811704911022	0.641512121697407	-3.88286361633519
THBD	4109	7056	thrombomodulin	0.67465788767132	4.24394148630684	2.01650211450858	0.0508496706293673	0.641512121697407	-3.84110115617789
MRS2	5133	57380	magnesium transporter MRS2	-0.252886051283582	4.05108452279257	-2.0163367829435	0.0508677239568916	0.641512121697407	-3.82627332119632
ZNF670	1994	93474	zinc finger protein 670	-0.438654128194948	1.07600549735334	-2.01595697997658	0.0509092175590911	0.641512121697407	-3.9909532831783
MTO1	12071	25821	mitochondrial tRNA translation optimization 1	-0.234149078388473	5.38970557325122	-2.01592363582645	0.0509128618256139	0.641512121697407	-3.87145567640197
FIGNL1	5034	63979	fidgetin like 1	-0.261803978894022	3.93800262904779	-2.01534728265613	0.0509758888258817	0.641512121697407	-3.82531311767957
MTIF2	3374	4528	mitochondrial translational initiation factor 2	-0.22935025489743	4.94813572723949	-2.01462950842344	0.0510544758723994	0.641512121697407	-3.85379739372996
LCOR	26042	84458	ligand dependent nuclear receptor corepressor	0.152669775247484	8.07666347741633	2.01430388983571	0.0510901616833641	0.641512121697407	-3.89637767474573
GSAP	9001	54103	gamma-secretase activating protein	-0.200540625809625	6.49669433376857	-2.01420807733658	0.0511006662827155	0.641512121697407	-3.90056973406907
UBXN10	5571	127733	UBX domain protein 10	0.565745859488624	1.50213425669544	2.01411266847425	0.0511111284968168	0.641512121697407	-3.91878184602163
NHLRC3	6409	387921	NHL repeat containing 3	-0.25384588383504	5.01012893591402	-2.0135206967437	0.0511760838060343	0.641512121697407	-3.8607260976803
CDH26	5748	60437	cadherin 26	0.484726901566223	2.75563412137197	2.01298694628144	0.0512347122582626	0.641512121697407	-3.83522505528709
ZPR1	7069	8882	ZPR1 zinc finger	-0.232722762297373	4.98868782423786	-2.0117545746488	0.0513703023252336	0.641512121697407	-3.86160083364698
LINC01513	483	112163642	long intergenic non-protein coding RNA 1513	0.795483141263906	1.02471539653657	2.01147493332234	0.0514011129289167	0.641512121697407	-3.98194792923921
GDPD5	9867	81544	glycerophosphodiester phosphodiesterase domain containing 5	0.426234071768216	2.78706892451272	2.01141712335959	0.0514074843787315	0.641512121697407	-3.83178044264349
EIF4G2	8655	1982	eukaryotic translation initiation factor 4 gamma 2	0.190360044690921	8.71355882355592	2.01120728343953	0.0514306173878873	0.641512121697407	-3.89109247702957
SBF2	16767	81846	SET binding factor 2	0.278461130609346	7.42106672736065	2.00997051073949	0.0515671448369163	0.641512121697407	-3.90922670035697
GGH	3130	8836	gamma-glutamyl hydrolase	0.728259017184247	0.93544526527439	2.00931125816902	0.0516400485499717	0.641512121697407	-3.99104576955884
PTPN6	5009	5777	protein tyrosine phosphatase non-receptor type 6	0.262464719498806	6.98421638445135	2.00920552465219	0.0516517494741948	0.641512121697407	-3.91355179204467
MAFG	5220	4097	MAF bZIP transcription factor G	0.443492623307954	3.13345165500383	2.00909605910033	0.051663865831498	0.641512121697407	-3.83094878966332
POGLUT1	7097	56983	protein O-glucosyltransferase 1	-0.270989509991916	4.81195972681114	-2.00810027681286	0.0517741990753938	0.641512121697407	-3.86226599286755
RAB43P1	589	440375	RAB43 pseudogene 1	0.56369199528794	2.51944734066561	2.00739904845721	0.0518520185140043	0.641512121697407	-3.84255425097872
MRTO4	2822	51154	MRT4 homolog, ribosome maturation factor	-0.389455002732263	3.1339627487177	-2.00738942039521	0.0518530877043812	0.641512121697407	-3.83580946350561
THUMPD2	3823	80745	THUMP domain containing 2	-0.268530529683852	3.41110234377973	-2.00712133430247	0.0518828662020757	0.641512121697407	-3.83355804939018
CPEB3	7928	22849	cytoplasmic polyadenylation element binding protein 3	0.303470693516597	3.87588883955466	2.00699377544686	0.0518970404209337	0.641512121697407	-3.83926237443713
NEK6	4419	10783	NIMA related kinase 6	0.292556548155922	5.57599999210303	2.00657187686211	0.0519439453852933	0.641512121697407	-3.89819211439806
ARG2	2418	384	arginase 2	0.764115055258539	1.34937995811305	2.00643387276736	0.0519592961183475	0.641512121697407	-3.96115672764374
HABP4	4056	22927	hyaluronan binding protein 4	-0.483791260484464	3.52215251395824	-2.0054287323653	0.05207122086238	0.641512121697407	-3.83578482560884
TNFRSF10C	2625	8794	TNF receptor superfamily member 10c	0.353266178109523	8.57942875272734	2.00529155997711	0.0520865115766403	0.641512121697407	-3.90038352799176
BTG2	2757	7832	BTG anti-proliferation factor 2	0.332748456644088	5.17998372682673	2.0043654305031	0.0521898501658957	0.641512121697407	-3.89140021749414
TMEM43	3572	79188	transmembrane protein 43	0.20782646930477	6.8387069905199	2.00419178237112	0.0522092458566106	0.641512121697407	-3.92092220322771
MYBL2	2777	4605	MYB proto-oncogene like 2	0.696102237635951	2.97926186696616	2.00416972368845	0.0522117101576988	0.641512121697407	-3.83898984342427
TDRD9	5480	122402	tudor domain containing 9	0.922691530105278	3.75508214768433	2.00323991625074	0.052315676256927	0.641512121697407	-3.84243552114051
HIPK3	7958	10114	homeodomain interacting protein kinase 3	0.248430054733896	9.42141952590015	2.00304852405349	0.0523370990317532	0.641512121697407	-3.88961929236847
NCAPG2	6988	54892	non-SMC condensin II complex subunit G2	-0.412496423627888	3.74076820439262	-2.00255800014463	0.0523920388261308	0.641512121697407	-3.84183771690955
KCTD9P2	1013	643535	potassium channel tetramerization domain containing 9 pseudogene 2	-0.443660810748332	1.68429030567824	-2.00249588879189	0.0523989990136651	0.641512121697407	-3.94386615878245
ZNF844	6620	284391	zinc finger protein 844	-0.317757591355965	4.65081930630017	-2.00211931340802	0.05244121519835	0.641512121697407	-3.86585215820677
YIPF3	3053	25844	Yip1 domain family member 3	0.264432489259262	4.16163312269868	2.00209761685791	0.0524436484022025	0.641512121697407	-3.85959360439295
NCSTN	4175	23385	nicastrin	0.293029646768123	5.40162825711868	2.00114110544831	0.0525510158959457	0.641512121697407	-3.89925006195197
TRMT11	2690	60487	tRNA methyltransferase 11 homolog	-0.310277944435242	3.84321219317074	-2.00107659117526	0.0525582644340575	0.641512121697407	-3.84445052781642
B3GNT5	8140	84002	UDP-GlcNAc:betaGal beta-1,3-N-acetylglucosaminyltransferase 5	0.466368768126624	4.84399519889802	2.00095031384658	0.0525724549107208	0.641512121697407	-3.87996390191428
EMILIN2	6435	84034	elastin microfibril interfacer 2	0.405535461689668	6.79468187066695	2.00048892977408	0.0526243314850631	0.641512121697407	-3.92518101049679
SMIM19	4056	114926	small integral membrane protein 19	-0.302708980484273	2.92218650009347	-1.99995156201167	0.0526848075010333	0.641512121697407	-3.84774183218145
RPGRIP1L	12857	23322	RPGRIP1 like	-0.34234668208775	2.62115375198313	-1.99973617701254	0.0527090641381417	0.641512121697407	-3.86629372399801
MDM1	6549	56890	Mdm1 nuclear protein	-0.221916788726938	5.45668406219862	-1.99946649316692	0.0527394495883908	0.641512121697407	-3.89694182156582
CANT1	4421	124583	calcium activated nucleotidase 1	0.282459265473451	5.1179051941554	1.99871452115232	0.052824255156137	0.641512121697407	-3.89915868844805
MRPL58	1108	3396	mitochondrial ribosomal protein L58	-0.370751250067277	2.7215655362746	-1.99854726871278	0.0528431335773074	0.641512121697407	-3.85872045944748
CYP2U1	6096	113612	cytochrome P450 family 2 subfamily U member 1	-0.410807174462268	3.30988847511038	-1.99767692971188	0.052941466708954	0.641512121697407	-3.84693573418313
CCNI	3741	10983	cyclin I	0.409615414403108	8.52363937127421	1.99713812270901	0.053002422141989	0.641512121697407	-3.9150794198496
PIGF	4978	5281	phosphatidylinositol glycan anchor biosynthesis class F	-0.239376195588166	3.85395258735082	-1.99699450222291	0.0530186802678199	0.641512121697407	-3.85201107871395
TPD52L2	4694	7165	TPD52 like 2	0.310628053897784	6.92121018579551	1.99490589157237	0.0532556051989534	0.641512121697407	-3.93615725235349
ADAMTS17	8242	170691	ADAM metallopeptidase with thrombospondin type 1 motif 17	-0.858342950103645	1.09121749177326	-1.99484226617939	0.0532628370573644	0.641512121697407	-4.03964781505549
FAM133B	4462	257415	family with sequence similarity 133 member B	-0.266016153121934	3.1887228773632	-1.9946553041354	0.0532840926752555	0.641512121697407	-3.85136701726864
ACOX1	8472	51	acyl-CoA oxidase 1	0.353886113968686	8.15057252828033	1.99450798635381	0.0533008463461007	0.641512121697407	-3.92555524118389
CCDC59	3784	29080	coiled-coil domain containing 59	-0.201848102348284	4.61470041059117	-1.99403400270238	0.0533547810355887	0.641512121697407	-3.87503582405192
ATF6	7890	22926	activating transcription factor 6	0.22982771042766	7.97714516182118	1.99381207973261	0.0533800499772175	0.641512121697407	-3.92964241678335
SHROOM4	10333	57477	shroom family member 4	0.789025463938777	1.42804349315088	1.9933047143827	0.0534378594466697	0.641512121697407	-3.96046113240035
NFAT5	16401	10725	nuclear factor of activated T cells 5	0.264153483785592	7.55799917966392	1.99295337726151	0.0534779228268421	0.641512121697407	-3.93589698711788
LYAR	2319	55646	Ly1 antibody reactive	-0.315761720647157	4.61310533948326	-1.99262895757731	0.0535149399358845	0.641512121697407	-3.8766385000771
GNG10	1491	2790	G protein subunit gamma 10	0.711781531326668	1.21393907529304	1.99169091141089	0.0536220985641627	0.641512121697407	-3.93161113028159
CTDSP2	5442	10106	CTD small phosphatase 2	0.295215664045883	7.23679666909684	1.99088267727691	0.0537145773275948	0.641512121697407	-3.94157331951779
FRMD8	4091	83786	FERM domain containing 8	0.299765581268043	4.40752782089468	1.98998876697229	0.0538170204249324	0.641512121697407	-3.88891063088494
DTX4	6072	23220	deltex E3 ubiquitin ligase 4	-0.483088067092579	2.36787954043873	-1.98984673293218	0.0538333132835101	0.641512121697407	-3.87885022069251
ZNF326	10984	284695	zinc finger protein 326	-0.212158411156401	5.3802143540018	-1.98901238614585	0.0539291084504712	0.641512121697407	-3.91028554779274
C17orf75	5740	64149	chromosome 17 open reading frame 75	-0.364489141221208	2.99891717592451	-1.98786213577244	0.0540614164800324	0.641512121697407	-3.86470666180345
SMIM5	5117	643008	small integral membrane protein 5	0.584305375713285	3.75760653093311	1.98772132254156	0.0540776329151769	0.641512121697407	-3.87418914140215
STAT2	6109	6773	signal transducer and activator of transcription 2	-0.476273629519671	7.40327364239237	-1.98738032785691	0.0541169202781749	0.641512121697407	-3.94649150700835
ZBTB7B	4303	51043	zinc finger and BTB domain containing 7B	0.421463531154587	5.84712617414971	1.98692820601478	0.0541690492287821	0.641512121697407	-3.94014085609517
ITGA5	7577	3678	integrin subunit alpha 5	0.221350172941857	7.59522370908117	1.98687178514777	0.0541755575241384	0.641512121697407	-3.94562621609815
DACH1	5389	1602	dachshund family transcription factor 1	0.730255311934638	3.11098267174901	1.98686502865222	0.0541763369491471	0.641512121697407	-3.86173582301012
EBAG9	3681	9166	estrogen receptor binding site associated antigen 9	-0.26616718096931	4.10142184444091	-1.98641958925436	0.0542277440208971	0.641512121697407	-3.86999353092487
WASF4P	1494	644739	WASP family member 4, pseudogene	0.42622777150403	3.86225424020955	1.98628454980962	0.0542433369497321	0.641512121697407	-3.86880287685612
KANSL1-AS1	976	644246	KANSL1 antisense RNA 1	1.01074551864877	1.47449149369468	1.98602386238713	0.0542734493821686	0.641512121697407	-3.94795204465161
MTND6P11	483	106480727	MT-ND6 pseudogene 11	0.959664553513994	0.884608120852667	1.98548802973339	0.0543353898312416	0.641512121697407	-4.04203667801929
EXOSC9	4711	5393	exosome component 9	-0.23616259692401	4.87866322521504	-1.98516746543425	0.0543724752915325	0.641512121697407	-3.89744757040046
MSANTD4	5105	84437	Myb/SANT DNA binding domain containing 4 with coiled-coils	-0.255986289564789	4.74376990898877	-1.98493978683011	0.0543988283188899	0.641512121697407	-3.89430769723436
IL17RA	9036	23765	interleukin 17 receptor A	0.361261802308974	8.46066518837566	1.98491575473774	0.0544016105984832	0.641512121697407	-3.93499611645147
RNU6-2	107	103625684	RNA, U6 small nuclear 2	-2.07356031417313	-0.716786612819695	-1.98479789240572	0.0544152577210117	0.641512121697407	-4.25039257855431
ERH	1446	2079	ERH mRNA splicing and mitosis factor	-0.252608019602801	4.35907688023108	-1.98477652544439	0.0544177320909413	0.641512121697407	-3.88270975236119
CD55	5568	1604	CD55 molecule (Cromer blood group)	0.476159229131353	8.39613460731167	1.98443177106846	0.0544576693629537	0.641512121697407	-3.93688190295921
RTN2	3238	6253	reticulon 2	0.628268248590598	1.63260782580869	1.98435655633395	0.0544663858168362	0.641512121697407	-3.93833160248276
RRP1	4251	8568	ribosomal RNA processing 1	-0.501280152939649	2.7519859701552	-1.98406649731484	0.0545000113874164	0.641512121697407	-3.87191938216792
SBNO1	11124	55206	strawberry notch homolog 1	0.129500272297144	7.39523681908899	1.98365036887582	0.054548283204493	0.641512121697407	-3.95167801153131
TREM1	4329	54210	triggering receptor expressed on myeloid cells 1	0.424768140609906	7.41339018093067	1.98208264688449	0.0547304755324557	0.642172249144975	-3.95317112234788
SLC6A9	5159	6536	solute carrier family 6 member 9	0.805582966520823	1.84506518638055	1.98204587363094	0.0547347554505042	0.642172249144975	-3.91739920633958
INTS2	7138	57508	integrator complex subunit 2	-0.232269555065046	5.10941719582891	-1.98140740138016	0.054809111407101	0.642172249144975	-3.91207952803059
ARHGAP26	13347	23092	Rho GTPase activating protein 26	0.284787696936471	8.9523749195997	1.98116378583675	0.0548375057476739	0.642172249144975	-3.93229991655245
TUBA1A	3421	7846	tubulin alpha 1a	0.290693381362891	7.43045996109832	1.98088464845543	0.0548700559734025	0.642172249144975	-3.95592268588471
MAN1A1	5014	4121	mannosidase alpha class 1A member 1	0.33819435443436	7.4767070637152	1.98055414865072	0.0549086172291179	0.642172249144975	-3.95556159096
VPS52	4503	6293	VPS52 subunit of GARP complex	-0.231591376936794	4.82997213981088	-1.98001300826171	0.0549718058191041	0.642318166517318	-3.90477835784049
ETS2	4595	2114	ETS proto-oncogene 2, transcription factor	0.382969525321772	6.8009182458794	1.97913671331464	0.0550742638561954	0.64292223594707	-3.95962971084307
POT1	5897	25913	protection of telomeres 1	-0.216557591773646	4.86966343703353	-1.97841675917695	0.0551585660467437	0.643313441572795	-3.90861349710678
ALDH1A2	8622	8854	aldehyde dehydrogenase 1 family member A2	0.617534418703558	2.54860430221157	1.97748692171804	0.0552676097490913	0.64399222178656	-3.88592323653479
WDR11	10837	55717	WD repeat domain 11	-0.228680113439784	6.59449150353211	-1.97694547779776	0.0553311918630519	0.644021286331346	-3.95978044224816
MTCH2	2897	23788	mitochondrial carrier 2	-0.21594882786384	4.6166385750414	-1.97659998009775	0.0553717970010134	0.644021286331346	-3.90226614047998
RPS6KA1	5884	6195	ribosomal protein S6 kinase A1	0.273911544367698	7.77792390905319	1.9760323699282	0.055438562292636	0.644206266053695	-3.96023958031035
AMZ2P1	3858	201283	archaelysin family metallopeptidase 2 pseudogene 1	-0.488317785000848	2.34656236082259	-1.97466934634279	0.0555991731854897	0.644894646240862	-3.9086685495051
GGA2	8231	23062	golgi associated, gamma adaptin ear containing, ARF binding protein 2	-0.25645020076125	6.30316696831805	-1.97466544761157	0.0555996331671421	0.644894646240862	-3.95999994726808
CHKB-CPT1B	5022	386593	CHKB-CPT1B readthrough (NMD candidate)	-0.581650712526795	1.7082832380369	-1.97410257999248	0.0556660762386094	0.64499574419515	-3.95405203639836
ZNF445	18871	353274	zinc finger protein 445	0.289537794789537	6.39158479389271	1.97372914299557	0.0557101961273878	0.64499574419515	-3.96609943748908
OAS2	6264	4939	2'-5'-oligoadenylate synthetase 2	-0.70662851079845	6.60020280037913	-1.97280353758048	0.0558196828011567	0.645673152839682	-3.9680064893865
WDR70	7039	55100	WD repeat domain 70	-0.222968400457354	4.79653441997771	-1.97200352345263	0.0559144637977515	0.645918858039059	-3.9142715603804
MED17	10773	9440	mediator complex subunit 17	-0.115684947999624	6.02043970185796	-1.97176358847374	0.0559429170431744	0.645918858039059	-3.95845154902849
EFHD2	2531	79180	EF-hand domain family member D2	0.360237707615039	6.57725048563614	1.97106272092926	0.0560261028553542	0.646290181025425	-3.97636104826208
PEX14	2995	5195	peroxisomal biogenesis factor 14	-0.506895455818191	1.47389609761892	-1.97054629540147	0.0560874657961435	0.646409319175572	-3.99341101311604
RPS12P26	396	100130495	ribosomal protein S12 pseudogene 26	0.363938374975853	2.61681466276178	1.96995042293666	0.0561583411095432	0.646637771357704	-3.89411210588591
ARL14EP	5465	120534	ADP ribosylation factor like GTPase 14 effector protein	-0.35330342511141	5.31608404333952	-1.9689404571933	0.0562786473166672	0.646965208855605	-3.93727115454981
IGF1R	13509	3480	insulin like growth factor 1 receptor	0.327886781170178	7.06351113927774	1.96875430409795	0.0563008460371564	0.646965208855605	-3.97793749791401
TRDMT1	10535	1787	tRNA aspartic acid methyltransferase 1	0.236508799144635	5.15642477187975	1.96733320373328	0.0564705618869266	0.646965208855605	-3.93830280148691
IRAK4	5629	51135	interleukin 1 receptor associated kinase 4	0.181519642406644	6.82096909252146	1.96696434385649	0.0565146855283422	0.646965208855605	-3.97930287232781
SERPINB10	2700	5273	serpin family B member 10	-1.15339664527984	0.818659828471427	-1.96669999746657	0.0565463254390895	0.646965208855605	-4.0566806182191
TNPO1P2	2665	252968	transportin 1 pseudogene 2	0.360327521518407	1.27699170930019	1.96644130249109	0.0565773037647979	0.646965208855605	-3.995799613896
BNIPL	2892	149428	BCL2 interacting protein like	0.37664249850465	0.933795040284144	1.96578163876427	0.0566563639571197	0.646965208855605	-4.03258250077934
TRIP6	2841	7205	thyroid hormone receptor interactor 6	0.428110638736348	1.57248245610997	1.96575193003348	0.0566599267740529	0.646965208855605	-3.95723005555101
MRPL24	1695	79590	mitochondrial ribosomal protein L24	-0.346530613699159	3.24554179023983	-1.96539734746663	0.0567024650233804	0.646965208855605	-3.88957850103566
IMP3	2565	55272	IMP U3 small nucleolar ribonucleoprotein 3	-0.322159513990849	3.80325911997234	-1.96496932755754	0.0567538501438374	0.646965208855605	-3.89596512687414
SAMD4B	8057	55095	sterile alpha motif domain containing 4B	0.294996864500611	4.24046521844278	1.96438054620644	0.0568246009967921	0.646965208855605	-3.91504879194583
ZFP69	3248	339559	ZFP69 zinc finger protein	-0.316793273996737	2.78450722164745	-1.96373481184944	0.0569022833163321	0.646965208855605	-3.9017158630812
PHF5A	1235	84844	PHD finger protein 5A	-0.28478687930658	3.14025504513967	-1.96353527220297	0.0569263066542176	0.646965208855605	-3.89263530255772
ZNF189	3433	7743	zinc finger protein 189	-0.18922221170941	5.14343619136968	-1.96343565164568	0.0569383036353793	0.646965208855605	-3.94222199515165
MFSD11	6587	79157	major facilitator superfamily domain containing 11	0.197090835071369	4.62384188826467	1.96302856131459	0.0569873509360253	0.646965208855605	-3.92803173491142
B4GALT1	4901	2683	beta-1,4-galactosyltransferase 1	0.289015898748019	5.53314662882998	1.962890110354	0.0570040401928671	0.646965208855605	-3.96347892470181
ACRBP	2843	84519	acrosin binding protein	0.368925377070206	3.24493440302237	1.96106400348206	0.0572245599780394	0.647716445782201	-3.89556146926477
RAP2C	4118	57826	RAP2C, member of RAS oncogene family	0.227036784580314	5.91705904193739	1.96092383103689	0.0572415175792826	0.647716445782201	-3.97463890945706
KIAA0556	9784	23247	KIAA0556	0.249798754975486	4.67394083056788	1.96024046320929	0.0573242514122267	0.647716445782201	-3.93709973825923
NOD1	6820	10392	nucleotide binding oligomerization domain containing 1	-0.307225830796175	4.06515166488388	-1.96006369735604	0.0573456688867269	0.647716445782201	-3.91030233943256
NSUN6	3498	221078	NOP2/Sun RNA methyltransferase 6	-0.210090487915641	4.86643818977241	-1.95915526566475	0.0574558463328743	0.647716445782201	-3.93644775384968
KCNMA1	19696	3778	potassium calcium-activated channel subfamily M alpha 1	1.13023198376682	0.383287899536288	1.9589485685571	0.057480940747181	0.647716445782201	-4.0698635902202
RPS27	946	6232	ribosomal protein S27	-0.353710327337075	3.89087648829966	-1.95882823967989	0.0574955538422939	0.647716445782201	-3.90604724627905
ALDH3A2	6457	224	aldehyde dehydrogenase 3 family member A2	-0.299269789765115	4.95854828485045	-1.9575518884516	0.0576507555097292	0.647716445782201	-3.94250988554353
ALAD	4983	210	aminolevulinate dehydratase	0.238896665786609	4.70018450619363	1.9573491219319	0.0576754448010955	0.647716445782201	-3.93955654578079
RFC5	3249	5985	replication factor C subunit 5	-0.256913160297989	3.35136500514507	-1.95637958109298	0.0577936245490191	0.647716445782201	-3.90169528805759
ODF3B	2301	440836	outer dense fiber of sperm tails 3B	-0.644898045664787	3.01652989810612	-1.95613934516456	0.0578229398346864	0.647716445782201	-3.90173994544183
VIM	5158	7431	vimentin	0.255154630801693	9.87948517534931	1.95575717495918	0.0578696014237492	0.647716445782201	-3.95234874964867
IL10RB	4548	3588	interleukin 10 receptor subunit beta	0.246070079979213	6.25197363079564	1.95512750033266	0.0579465533698213	0.647716445782201	-3.99350060370039
HERC6	5793	55008	HECT and RLD domain containing E3 ubiquitin protein ligase family member 6	-0.493602366843411	5.0075793313632	-1.95474646152691	0.0579931626913124	0.647716445782201	-3.95098456926327
STYXL1	2028	51657	serine/threonine/tyrosine interacting like 1	-0.332998943011046	3.68771362122996	-1.95473915524509	0.0579940567246662	0.647716445782201	-3.90876234665391
RRAGC	5167	64121	Ras related GTP binding C	0.187400665916075	4.1233493077958	1.95471253934358	0.0579973136808086	0.647716445782201	-3.92143005514065
LILRA2	5349	11027	leukocyte immunoglobulin like receptor A2	0.362708407672321	6.45034835065318	1.95458221999111	0.0580132629859121	0.647716445782201	-3.99823121076915
EP300	12500	2033	E1A binding protein p300	0.220344595406829	7.92318229981903	1.95421544419954	0.0580581716649516	0.647716445782201	-3.99301537631916
TBCCD1	3405	55171	TBCC domain containing 1	-0.263578771557937	3.60343902009315	-1.95368368131324	0.0581233349926392	0.647716445782201	-3.90761964599999
RPSA	3936	3921	ribosomal protein SA	-0.323511592191558	5.30277277375286	-1.95326869990992	0.0581742315576975	0.647716445782201	-3.9655507032066
STX6	6477	10228	syntaxin 6	0.184696018036495	6.63072618561137	1.95282493071991	0.0582287014750876	0.647716445782201	-3.99869457409936
PHF11	4841	51131	PHD finger protein 11	-0.286155440808879	6.14840623269871	-1.95268195875778	0.0582462597774962	0.647716445782201	-3.99105878067515
FMN1	20084	342184	formin 1	-0.767845798681304	3.73135732988261	-1.95232516698766	0.0582900971120212	0.647716445782201	-3.91055300187533
MZB1	2273	51237	marginal zone B and B1 cell specific protein	0.961531321901234	2.42148503176323	1.95226454395015	0.0582975484124198	0.647716445782201	-3.9067661353837
CARD6	4399	84674	caspase recruitment domain family member 6	0.429891281402767	4.84424366576074	1.95134132769433	0.0584111244938126	0.648409555511507	-3.95215448141206
MLC1	4297	23209	modulator of VRAC current 1	0.505273001330297	1.74032918926168	1.949229110923	0.0586716929400467	0.650118624269162	-3.96480470215739
RASA2	5993	5922	RAS p21 protein activator 2	0.16394163266531	7.71862878509577	1.94867482658458	0.0587402368757776	0.650118624269162	-4.00369583693889
SHKBP1	3936	92799	SH3KBP1 binding protein 1	0.484619730324668	6.63206318239444	1.94849316505318	0.0587627165486947	0.650118624269162	-4.01055232792601
ARRDC3	4934	57561	arrestin domain containing 3	-0.231274838516647	9.00922906130732	-1.94843112701257	0.0587703951356537	0.650118624269162	-3.98310954829768
HMGN2P5	273	727795	high mobility group nucleosomal binding domain 2 pseudogene 5	-0.315663834008236	2.46120201390791	-1.94768000718372	0.0588634316661286	0.650579603388468	-3.92167168206934
VPS41	7801	27072	VPS41 subunit of HOPS complex	-0.154601970443347	7.05234680103471	-1.94632576172679	0.0590314948659627	0.650584228040545	-4.01118913561009
TIMM17A	3513	10440	translocase of inner mitochondrial membrane 17A	-0.204763529520248	4.04488366408312	-1.94625448269923	0.0590403521242901	0.650584228040545	-3.92730785183158
DPH3	3562	285381	diphthamide biosynthesis 3	0.169621460913074	4.97787633754678	1.94620461214789	0.0590465498093307	0.650584228040545	-3.96505151945284
PIGP	7923	51227	phosphatidylinositol glycan anchor biosynthesis class P	-0.324751972163853	2.7338108796121	-1.94594842624525	0.0590783962779528	0.650584228040545	-3.92376475981363
TMBIM4	4137	51643	transmembrane BAX inhibitor motif containing 4	0.241483342195087	5.96552178784861	1.94525051907545	0.0591652283185983	0.650584228040545	-3.99981024863057
HSD17B7	4124	51478	hydroxysteroid 17-beta dehydrogenase 7	-0.263788588340006	3.07775907031263	-1.9448965457872	0.0592093109563709	0.650584228040545	-3.91752561272284
UHRF1BP1L	6616	23074	UHRF1 binding protein 1 like	0.240725603758833	7.4173211955785	1.94467336481556	0.0592371197259989	0.650584228040545	-4.01218099863633
STARD3NL	4348	83930	STARD3 N-terminal like	-0.240858983575296	4.64729298786745	-1.94403177092867	0.0593171263069346	0.650584228040545	-3.9523067085449
APOL3	5901	80833	apolipoprotein L3	-0.287307056220857	6.5010531869557	-1.94373027749546	0.0593547546418757	0.650584228040545	-4.01141665849644
ADCY10P1	5741	221442	ADCY10 pseudogene 1	0.277430611366553	4.87504841570033	1.94306430742164	0.0594379450142754	0.650584228040545	-3.9663052711855
PISD	5002	23761	phosphatidylserine decarboxylase	0.302105583929436	6.36115240346965	1.94255980173236	0.0595010328304027	0.650584228040545	-4.0156005343671
IQCH-AS1	6732	100506686	IQCH antisense RNA 1	-0.511990890327354	2.06683121537031	-1.94217324547037	0.0595494102912003	0.650584228040545	-3.9651227477864
ZNF302	5032	55900	zinc finger protein 302	-0.28285892334195	5.17593787766685	-1.94138135270624	0.059648621507033	0.650584228040545	-3.97295349225845
N6AMT1	4865	29104	N-6 adenine-specific DNA methyltransferase 1	-0.381642781190435	3.45443053555491	-1.94108468058814	0.0596858263631252	0.650584228040545	-3.92175110088156
BLZF1	3820	8548	basic leucine zipper nuclear factor 1	-0.152410749536855	5.34387013922455	-1.94099498592038	0.059697078670626	0.650584228040545	-3.98418693088356
ACAD10	8931	80724	acyl-CoA dehydrogenase family member 10	-0.230948941641815	4.56023327272092	-1.94081915999658	0.0597191415594557	0.650584228040545	-3.95661153992495
C16orf87	7443	388272	chromosome 16 open reading frame 87	-0.306172122405672	3.44133689487967	-1.94034408998649	0.0597787891963004	0.650584228040545	-3.92315063989993
APOOL	6548	139322	apolipoprotein O like	-0.227742951448852	3.74024995437563	-1.94026747697305	0.059788413187999	0.650584228040545	-3.92784053685068
AGPAT5	4684	55326	1-acylglycerol-3-phosphate O-acyltransferase 5	-0.307603552246692	4.62371297933616	-1.93972231920308	0.0598569335329131	0.650770746890882	-3.95806283946234
NFYC	5990	4802	nuclear transcription factor Y subunit gamma	0.220844385782993	5.32128424246651	1.93919016598845	0.0599238846455175	0.650939899588443	-3.99323098739025
TCTE3	2626	6991	t-complex-associated-testis-expressed 3	-0.433635495303228	1.81981034459141	-1.93834148138013	0.0600307927144252	0.651083350556039	-3.99098078151665
KPNA4	9413	3840	karyopherin subunit alpha 4	0.143882234789033	7.287920827157	1.93784868183636	0.0600929456773211	0.651083350556039	-4.02357456108065
PKIA	4216	5569	cAMP-dependent protein kinase inhibitor alpha	-0.568528620361674	3.58516252443037	-1.93755264665467	0.0601303089508069	0.651083350556039	-3.92835016881923
PCDH1	5903	5097	protocadherin 1	0.889043541645587	0.833871540662203	1.93713817619491	0.0601826538545367	0.651083350556039	-4.07428639169954
DDX52	9546	11056	DExD-box helicase 52	-0.152474909713303	5.47995369130338	-1.93704750321496	0.060194110492746	0.651083350556039	-3.99451435598219
GRHPR	7226	9380	glyoxylate and hydroxypyruvate reductase	-0.400282715969614	4.52748121837962	-1.93627731009887	0.0602915011270908	0.651580335559498	-3.96282163759053
ACBD5	4371	91452	acyl-CoA binding domain containing 5	-0.168858543180339	5.65242699706588	-1.93516898399097	0.0604318868658575	0.65217105478076	-4.00384542074703
FUBP1	5666	8880	far upstream element binding protein 1	-0.168778378106633	7.53992232436678	-1.93433736216933	0.0605374088472098	0.65217105478076	-4.02814727593681
TSTD3	962	100130890	thiosulfate sulfurtransferase like domain containing 3	-0.630866456190412	0.779199353622116	-1.93413259725957	0.0605634151934484	0.65217105478076	-4.10565296364455
LRRC23	3054	10233	leucine rich repeat containing 23	-0.439138718767476	1.25426064557273	-1.9338661986333	0.0605972637916185	0.65217105478076	-4.0533775663713
OXSM	2486	54995	3-oxoacyl-ACP synthase, mitochondrial	-0.406708427208734	2.33071264000139	-1.93381626185882	0.0606036105697895	0.65217105478076	-3.95592470643346
KRT72	2154	140807	keratin 72	-1.69938962681095	0.0348515743070809	-1.93289397343021	0.0607209330072845	0.652392142509704	-4.22354115948012
ZNF677	9348	342926	zinc finger protein 677	-0.420507348348215	1.85120729346559	-1.93229054325572	0.0607977999780837	0.652392142509704	-3.99662580771305
XAF1	6615	54739	XIAP associated factor 1	-0.796323831011253	7.49979905261242	-1.93154736500836	0.0608925837033791	0.652392142509704	-4.0321727690175
LITAF	5060	9516	lipopolysaccharide induced TNF factor	0.296532494366947	9.67209695611454	1.93132563496184	0.0609208874271416	0.652392142509704	-3.99141702928053
CACNA2D3	4670	55799	calcium voltage-gated channel auxiliary subunit alpha2delta 3	-0.655587729288827	2.08789874223046	-1.93117071959521	0.0609406690154849	0.652392142509704	-3.98381149120813
EVPL	7510	2125	envoplakin	1.19418813910921	0.522106046381248	1.93083221058463	0.0609839134564248	0.652392142509704	-4.11076056055965
ZNF584	3696	201514	zinc finger protein 584	-0.517237985944566	1.5191034137997	-1.93082600212916	0.0609847068317929	0.652392142509704	-4.02551967694002
CTSA	5856	5476	cathepsin A	0.27945579350708	5.94160211787243	1.92996969864282	0.0610942186172562	0.6525054306507	-4.02679304080594
TRIM69	9265	140691	tripartite motif containing 69	-0.232387850034041	6.11307169972441	-1.9296152758936	0.0611395949114074	0.6525054306507	-4.02772375350171
ITM2C	2611	81618	integral membrane protein 2C	0.544577246401453	2.60251161921154	1.92907157839227	0.0612092602172368	0.6525054306507	-3.93950776330673
CD82	4054	3732	CD82 molecule	0.388487571084602	5.18510060849977	1.92889863089622	0.0612314347317029	0.6525054306507	-4.01123748884613
POLE4	2151	56655	DNA polymerase epsilon 4, accessory subunit	-0.307545250560757	3.03783328202223	-1.92846217203083	0.0612874261901536	0.6525054306507	-3.93807358817394
TRPC1	4768	7220	transient receptor potential cation channel subfamily C member 1	-0.484603085610599	2.16101651346281	-1.92832996912158	0.0613043946371651	0.6525054306507	-3.97399853620546
NRF1	4125	4899	nuclear respiratory factor 1	0.163524154972329	4.81102404989035	1.92730921824453	0.0614355458137768	0.652564538343728	-3.98770232364014
FIZ1	6790	84922	FLT3 interacting zinc finger 1	-0.42731758177407	0.960831500000529	-1.9268989830314	0.0614883228867967	0.652564538343728	-4.08500648821854
TSTA3	3622	7264	tissue specific transplantation antigen P35B	0.465986920152138	4.78544118632411	1.92594167520538	0.0616116330851145	0.652564538343728	-3.99843932100038
SEMA4A	6822	64218	semaphorin 4A	0.385150210229262	6.75709128653756	1.92567811424167	0.0616456195436794	0.652564538343728	-4.04454700254395
DCLRE1A	4600	9937	DNA cross-link repair 1A	-0.326032600914554	3.68239478996992	-1.92526491180422	0.0616989349018522	0.652564538343728	-3.94678820431465
AP3M2	6276	10947	adaptor related protein complex 3 subunit mu 2	-0.400940657369341	4.72013934213448	-1.92520842307311	0.0617062267044496	0.652564538343728	-3.98033616779516
VPS9D1	3428	9605	VPS9 domain containing 1	0.563820058210085	3.64991140711291	1.92488964024905	0.061747390433225	0.652564538343728	-3.96041857773095
TRIM22	6020	10346	tripartite motif containing 22	-0.498502734663267	9.07196440810261	-1.92422416074144	0.0618333985070577	0.652564538343728	-4.01643790538492
ZNF688	3023	146542	zinc finger protein 688	-0.414156370406395	2.15049105350579	-1.92418907092554	0.0618379364537738	0.652564538343728	-3.96413830780416
NLRC4	3624	58484	NLR family CARD domain containing 4	0.504615961776912	6.35585416704848	1.92331030998162	0.0619516746040067	0.652564538343728	-4.04337394380435
SLC46A3	3776	283537	solute carrier family 46 member 3	0.181634379526106	5.13977080454649	1.92328225146268	0.0619553091852727	0.652564538343728	-4.00388937128725
ZNF354B	3750	117608	zinc finger protein 354B	-0.295239795177342	3.51911172852125	-1.92299236331374	0.0619928708039377	0.652564538343728	-3.94655398283873
VASH1	6502	22846	vasohibin 1	0.620060662695978	2.73102694714167	1.92278292136626	0.0620200209725549	0.652564538343728	-3.94824561151025
CNOT6	6586	57472	CCR4-NOT transcription complex subunit 6	0.175362007024935	6.44449945046289	1.92269638736982	0.0620312414468537	0.652564538343728	-4.04381107426338
DFFA	6622	1676	DNA fragmentation factor subunit alpha	-0.2509302438796	4.93818279159771	-1.92210228918198	0.0621083226502706	0.65283320721023	-3.99477233818905
CASC4	6948	113201	cancer susceptibility 4	0.216372417148968	7.39911133351795	1.92133597311581	0.0622078699148963	0.652939942054122	-4.0485449493144
EIF3EP1	1316	3647	eukaryotic translation initiation factor 3 subunit E pseudogene 1	-0.461130021808807	2.81661412561808	-1.92123052885908	0.0622215782456439	0.652939942054122	-3.95341691212867
TARS2	4077	80222	threonyl-tRNA synthetase 2, mitochondrial	-0.26544677806655	3.77359272539089	-1.92035923939066	0.0623349501158008	0.653069099507581	-3.95497984914786
ITPRIP	7026	85450	inositol 1,4,5-trisphosphate receptor interacting protein	0.294361328146952	6.56480475032429	1.92000094961259	0.0623816221750903	0.653069099507581	-4.05295834482152
MUL1	2438	79594	mitochondrial E3 ubiquitin protein ligase 1	0.281789842841732	3.78036855848772	1.91994764303546	0.0623885686407842	0.653069099507581	-3.96070185508758
LONRF1	5685	91694	LON peptidase N-terminal domain and ring finger 1	-0.215474689968475	4.73022126591742	-1.9178376844299	0.0626640554823556	0.655164372576211	-3.99595105808641
ANP32B	1850	10541	acidic nuclear phosphoprotein 32 family member B	0.456657476679693	5.52362661616706	1.91762268633469	0.0626921853436261	0.655164372576211	-4.02873371005495
ECE1	7265	1889	endothelin converting enzyme 1	0.383673157958262	7.47815740578963	1.91632673821368	0.0628619742764051	0.655335582486413	-4.05665393305743
GNB1L	6988	54584	G protein subunit beta 1 like	-0.537837321077172	0.73082715094246	-1.91627063113284	0.0628693340762334	0.655335582486413	-4.07498214148408
CD22	6248	933	CD22 molecule	-0.580794681288413	4.35993126910771	-1.91598544528596	0.0629067545441973	0.655335582486413	-3.9824254725659
MED12	7425	9968	mediator complex subunit 12	0.288228740495784	5.45679343812901	1.91591860845541	0.0629155272622358	0.655335582486413	-4.03460880459342
IGHV3-7	430	28452	immunoglobulin heavy variable 3-7	0.891483419935905	1.86154088158963	1.91465378731331	0.063081740641774	0.656154615487635	-3.98563605363596
CACYBP	4511	27101	calcyclin binding protein	-0.273100533526216	4.29253265010437	-1.91424934592239	0.0631349688807298	0.656154615487635	-3.98116228776578
NMD3	4869	51068	NMD3 ribosome export adaptor	-0.210215673774053	4.90974121391584	-1.91404301122924	0.0631621393049217	0.656154615487635	-4.00585869392
RALGAPA2	11366	57186	Ral GTPase activating protein catalytic alpha subunit 2	0.373313505263024	7.70903048915723	1.9131575468026	0.0632788525316648	0.656154615487635	-4.05858657267874
DHX58	3843	79132	DExH-box helicase 58	-0.52393324985799	4.35702389922233	-1.91298636351803	0.0633014375928713	0.656154615487635	-3.99243256752492
MKNK2	5221	2872	MAPK interacting serine/threonine kinase 2	0.299861556768282	6.20380250043575	1.91263530080267	0.0633477767068872	0.656154615487635	-4.06441794083372
PTPDC1	6342	138639	protein tyrosine phosphatase domain containing 1	-0.437405119936666	2.64200706639981	-1.91217678401223	0.0634083432881284	0.656154615487635	-3.96756080810275
PRPF3	5373	9129	pre-mRNA processing factor 3	-0.175111447529588	5.760448214173	-1.91181050905018	0.0634567611600969	0.656154615487635	-4.04322873326901
NABP1	13806	64859	nucleic acid binding protein 1	0.31459735079701	9.79978677048861	1.91178300478564	0.0634603982293031	0.656154615487635	-4.01963058942699
CERS4	4059	79603	ceramide synthase 4	0.495700078350144	3.58798746155302	1.9098883667382	0.0637113700281075	0.657973896885709	-3.9693971089835
EPDR1	2864	54749	ependymin related 1	0.64980212980658	0.801270681402288	1.90941251776526	0.0637745367659997	0.657973896885709	-4.10308037472931
RWDD2A	3744	112611	RWD domain containing 2A	-0.414032345501755	1.49563059130431	-1.90927956469712	0.0637921952767765	0.657973896885709	-4.03909739491128
B3GALNT2	5702	148789	beta-1,3-N-acetylgalactosaminyltransferase 2	0.375663044089785	3.39285675635959	1.90777000326776	0.0639929862840967	0.658084128593415	-3.96592279228398
SHARPIN	2783	81858	SHANK associated RH domain interactor	0.585074813200832	3.74552917749297	1.90763295509287	0.0640112422848716	0.658084128593415	-3.98287324489685
PPP1R8	2819	5511	protein phosphatase 1 regulatory subunit 8	-0.194232343909932	5.14527803016664	-1.90731529568272	0.0640535744558836	0.658084128593415	-4.02550836266834
UHRF2	9919	115426	ubiquitin like with PHD and ring finger domains 2	-0.170598784496147	6.56218941960956	-1.90694175083613	0.0641033848201602	0.658084128593415	-4.06958884490912
C2orf49	4768	79074	chromosome 2 open reading frame 49	-0.164985135947945	5.15374392943372	-1.90692414821603	0.0641057328629389	0.658084128593415	-4.02492693992356
ATF7	7980	11016	activating transcription factor 7	0.361545386589998	3.97371910047402	1.9068575064973	0.064114622981547	0.658084128593415	-3.98403228745785
ACTR6	3813	64431	actin related protein 6	-0.236242916569422	4.22703756803271	-1.90645400089203	0.0641684739223557	0.658103555223123	-3.98780360029691
EEF1B2P6	673	647030	eukaryotic translation elongation factor 1 beta 2 pseudogene 6	-0.444940312416852	3.15530736333644	-1.90527014801928	0.0643266923417059	0.658220562574299	-3.96713133249354
PRR3	4281	80742	proline rich 3	-0.327983331340699	3.15625772988931	-1.90523858757427	0.0643309148793068	0.658220562574299	-3.96718823284626
NDUFS3	3670	4722	NADH:ubiquinone oxidoreductase core subunit S3	-0.26695305143466	3.62069061279819	-1.90520218695924	0.0643357852887244	0.658220562574299	-3.9745142336087
STXBP5	10504	134957	syntaxin binding protein 5	0.273195316886644	8.06301505456957	1.90409659054435	0.064483865151602	0.658936780863725	-4.067927274955
IFIT5	4015	24138	interferon induced protein with tetratricopeptide repeats 5	-0.515403940241666	6.59328172697996	-1.90390289614639	0.0645098380128706	0.658936780863725	-4.07575613432341
GEMIN6	4361	79833	gem nuclear organelle associated protein 6	-0.312026818263821	3.12015202518807	-1.90324043190527	0.0645987370038529	0.659138825620725	-3.96969752321526
RPP30	4653	10556	ribonuclease P/MRP subunit p30	-0.252073993620816	3.9388149674248	-1.90298011968663	0.0646336982015586	0.659138825620725	-3.98373618368415
AREL1	7308	9870	apoptosis resistant E3 ubiquitin protein ligase 1	0.204450823447154	7.52566470030111	1.90186648321286	0.0647834483349096	0.659891459179162	-4.07827305695651
MTMR3	9903	8897	myotubularin related protein 3	0.294303297231671	7.97303098338209	1.90165664361724	0.0648116986593145	0.659891459179162	-4.07204767754112
ANKRA2	2659	57763	ankyrin repeat family A member 2	-0.195455222392565	4.81599693178349	-1.9003887609823	0.0649826163159642	0.660443141177518	-4.02355250707985
CEACAM3	3080	1084	CEA cell adhesion molecule 3	0.33004121653933	5.20386724439057	1.89936623054254	0.0651207405927691	0.660443141177518	-4.04994020368272
FLOT1	3186	10211	flotillin 1	0.418254864478493	6.94255157752559	1.89932567006858	0.0651262247234601	0.660443141177518	-4.08423851382819
MPO	3526	4353	myeloperoxidase	-1.06480304259849	2.22982053691423	-1.89874553562291	0.0652047073252349	0.660443141177518	-3.99093325582033
TFE3	4283	7030	transcription factor binding to IGHM enhancer 3	0.322436310734874	5.42118030097446	1.89844679672193	0.0652451533840993	0.660443141177518	-4.06512242370504
MSRA	4162	4482	methionine sulfoxide reductase A	0.368940746666629	3.61053237209555	1.89827958826191	0.0652678010133375	0.660443141177518	-3.9842028771095
SAP30L	6755	79685	SAP30 like	0.198272483616982	5.9884647025545	1.89827205804674	0.0652688211054976	0.660443141177518	-4.07369583236056
BICD1	12868	636	BICD cargo adaptor 1	-0.274818470337354	3.38764976859329	-1.89816720629558	0.0652830264293583	0.660443141177518	-3.97813454535806
ZCRB1	2446	85437	zinc finger CCHC-type and RNA binding motif containing 1	-0.21718215249139	3.50726447944941	-1.89709255572488	0.0654287730516478	0.661389337168533	-3.98126927165616
TOE1	2742	114034	target of EGR1, exonuclease	-0.300935230452194	2.82176956297949	-1.89565718358517	0.0656238766071572	0.661797192486653	-3.98013555148927
GALNT4	5399	8693	polypeptide N-acetylgalactosaminyltransferase 4	0.475789970273987	0.757371608089521	1.89542277719732	0.0656557857124069	0.661797192486653	-4.10277200348419
UFM1	4382	51569	ubiquitin fold modifier 1	-0.196248810825009	6.25192704655605	-1.894755529402	0.0657466891536038	0.661797192486653	-4.0796686021089
PALB2	4747	79728	partner and localizer of BRCA2	-0.224789538444459	3.93114479143763	-1.89415567600035	0.0658285030724833	0.661797192486653	-3.99495493046262
BLZF2P	1130	317729	basic leucine zipper nuclear factor 2, pseudogene	0.423378531420719	2.0511673935716	1.89414837370217	0.0658294995691118	0.661797192486653	-4.00379698708042
PUS3	2010	83480	pseudouridine synthase 3	-0.231994070435823	3.28115703179505	-1.89376843927362	0.0658813645582185	0.661797192486653	-3.98204333078853
PPM1D	5044	8493	protein phosphatase, Mg2+/Mn2+ dependent 1D	0.177055207529129	5.1237580214958	1.89373659678124	0.0658857129784191	0.661797192486653	-4.04745812500835
CKAP4	3638	10970	cytoskeleton associated protein 4	0.51912697312625	6.01656707052016	1.89372629513631	0.0658871198267543	0.661797192486653	-4.08334524053348
FBXO22	11837	26263	F-box protein 22	-0.214101476033632	5.20350108253221	-1.89303186242002	0.0659820146820503	0.662225196484032	-4.04931466992197
IGLV2-8	526	28817	immunoglobulin lambda variable 2-8	0.913361428624146	1.01154126152891	1.89205941141017	0.066115097775232	0.663035493603395	-4.02041976791889
PCYT1A	7978	5130	phosphate cytidylyltransferase 1, choline, alpha	0.201657824472246	7.0984860298729	1.89116350855765	0.0662379084459637	0.663741573082734	-4.09656447048508
CYCS	4457	54205	cytochrome c, somatic	-0.203157605387982	5.11147567058679	-1.88976594611545	0.0664298769226028	0.665138989013191	-4.05152445978087
ZC3H12D	6733	340152	zinc finger CCCH-type containing 12D	-0.463794674432571	3.5944855417526	-1.88906834595033	0.066525877069578	0.665565430447202	-3.99428945023333
ATXN1L	8542	342371	ataxin 1 like	0.155785902329794	5.59590980743473	1.88869312613506	0.0665775620066797	0.665565430447202	-4.07542929177328
HBQ1	536	3049	hemoglobin subunit theta 1	0.915805774710039	0.236805255176751	1.88787312314728	0.066690633622917	0.666170004312198	-4.11599503089776
RNF8	6575	9025	ring finger protein 8	-0.244119963813009	3.8236797151007	-1.88690456848987	0.0668244010312737	0.666980191853517	-4.00133535715118
ETFDH	4493	2110	electron transfer flavoprotein dehydrogenase	-0.188071060764549	4.67712101578428	-1.88434049559432	0.0671796353254286	0.668246063578227	-4.03723999323321
ITGA2B	5551	3674	integrin subunit alpha 2b	0.522711645601535	5.45162729947215	1.88412655262506	0.0672093485312154	0.668246063578227	-4.08850484582533
C1QB	1601	713	complement C1q B chain	1.19655696731458	0.624652010207806	1.88392986393138	0.0672366753192245	0.668246063578227	-4.12810011232872
PNPLA4	3441	8228	patatin like phospholipase domain containing 4	-0.477580959402532	1.23729201113446	-1.88330202135421	0.0673239677492469	0.668246063578227	-4.09277360414392
KLHL20	4254	27252	kelch like family member 20	-0.235502912305139	4.69536900523737	-1.88328817799813	0.0673258935597656	0.668246063578227	-4.04032809982862
LINC01347	5301	731275	long intergenic non-protein coding RNA 1347	0.484798288267797	0.907032204789318	1.88291787622264	0.0673774253739779	0.668246063578227	-4.10183455998377
RASGEF1B	10183	153020	RasGEF domain family member 1B	-0.386944674309624	3.9950665588351	-1.88278529272593	0.0673958841174042	0.668246063578227	-4.01308123539846
UMPS	7579	7372	uridine monophosphate synthetase	-0.282895519821037	4.05295424858596	-1.88259353225408	0.0674225893424681	0.668246063578227	-4.01528461634774
HSPBAP1	5434	79663	HSPB1 associated protein 1	0.267022123388226	5.85016987875178	1.88256861930235	0.06742605947047	0.668246063578227	-4.09317573698248
OVCH1-AS1	1841	101055625	OVCH1 antisense RNA 1	1.60423442062587	0.135523660012033	1.88114299621105	0.0676248893800302	0.669692610545318	-4.19971212833522
MIR4453	3000	100616193	microRNA 4453	-0.257962665139382	3.09624044732302	-1.88021491050555	0.0677545976938606	0.669892589317832	-3.99838225455641
RNU4ATAC11P	126	106481158	RNA, U4atac small nuclear 11, pseudogene	0.645941187316762	0.817382916495401	1.88002342689684	0.0677813857101899	0.669892589317832	-4.13350342111135
UPF3A	5772	65110	UPF3A regulator of nonsense mediated mRNA decay	-0.282981146846083	4.36625569492498	-1.87975264363269	0.067819282984892	0.669892589317832	-4.03144054453924
TTC28-AS1	10818	284900	TTC28 antisense RNA 1	-0.246790198493122	3.41351073337768	-1.87948585296004	0.0678566391990193	0.669892589317832	-4.00299873079833
APLP2	7451	334	amyloid beta precursor like protein 2	0.261751241213427	8.13065246281031	1.87850252569112	0.0679944773421404	0.670591490077304	-4.10535075274181
CASC3	6380	22794	CASC3 exon junction complex subunit	0.233879377803301	6.660934239771	1.87811492656902	0.0680488748877941	0.670591490077304	-4.11592043770015
CD177	2501	57126	CD177 molecule	2.47349683602986	2.92642311337709	1.87768069238674	0.0681098616126278	0.670591490077304	-4.00399935074111
TET3	12271	200424	tet methylcytosine dioxygenase 3	0.20500581659379	6.81818723598948	1.87747183835134	0.0681392110950174	0.670591490077304	-4.11864534029231
MRPL17	2276	63875	mitochondrial ribosomal protein L17	-0.329973982468093	3.26469571603375	-1.87702234201055	0.0682024138237745	0.670692370723546	-4.00380695960691
MAP3K7CL	4497	56911	MAP3K7 C-terminal like	0.362462739408082	7.10888806119885	1.87658063830669	0.0682645696575959	0.670782807822428	-4.11575131198773
EXTL3	13220	2137	exostosin like glycosyltransferase 3	0.36549631288126	6.2236684273379	1.87602242729252	0.0683431894676263	0.671034757982136	-4.11591514409021
NAP1L1P1	1063	729561	nucleosome assembly protein 1 like 1 pseudogene 1	0.548089341186965	2.59859441417346	1.87533139825806	0.0684406228842078	0.671409959697315	-4.01046572052506
SERPINB6	4729	5269	serpin family B member 6	-0.240530801781982	4.73875498926436	-1.87477252501279	0.068519509461018	0.671409959697315	-4.05590932224218
ZNF37BP	10256	100129482	zinc finger protein 37B, pseudogene	-0.240415696479713	6.13424174619964	-1.87462441010716	0.0685404293295933	0.671409959697315	-4.10754390473331
NMRK1	3865	54981	nicotinamide riboside kinase 1	0.224492849509457	4.80075229355492	1.8739590058945	0.0686344789070998	0.67149207710581	-4.06538751313867
ZBTB6	4106	10773	zinc finger and BTB domain containing 6	-0.179441460204422	5.37126968842194	-1.87381503269569	0.0686548428747848	0.67149207710581	-4.08378757376842
CHRNB1	4329	1140	cholinergic receptor nicotinic beta 1 subunit	-0.308973638822141	2.09822208450797	-1.87343291689214	0.0687089154267829	0.671502409564531	-4.02790305909012
MRPL35	3829	51318	mitochondrial ribosomal protein L35	-0.276747730887436	4.34409035154689	-1.87287588854192	0.0687878047331603	0.671684062909174	-4.03928920889845
MTERF3	1801	51001	mitochondrial transcription termination factor 3	-0.247503560684436	3.37530540446225	-1.87251425610518	0.0688390624515679	0.671684062909174	-4.01063496563195
STAG1	7846	10274	stromal antigen 1	0.144871364877386	7.18420063765632	1.87185800314487	0.0689321629654891	0.671684062909174	-4.12516259498358
PSMA2	5336	5683	proteasome 20S subunit alpha 2	-0.171235980901235	4.17680695019822	-1.87170195510249	0.0689543168250561	0.671684062909174	-4.03630717575371
CDC23	4618	8697	cell division cycle 23	-0.249154569259869	4.69936369827949	-1.87061587504562	0.0691086741801904	0.671684062909174	-4.05731456100741
TIGD2	3217	166815	tigger transposable element derived 2	-0.410715291055813	2.87905846003658	-1.86917109163919	0.0693144689824308	0.671684062909174	-4.01235432665802
TBC1D7	8300	51256	TBC1 domain family member 7	0.314989377251314	3.55784331705185	1.86915148035158	0.0693172660080653	0.671684062909174	-4.02162284283101
TTC37	8092	9652	tetratricopeptide repeat domain 37	-0.253286296496451	6.98380245247915	-1.86903702502792	0.069333591921249	0.671684062909174	-4.1283622047057
PRKAG2	6740	51422	protein kinase AMP-activated non-catalytic subunit gamma 2	-0.272904068557625	5.21766971641461	-1.86848059167026	0.0694130083908869	0.671684062909174	-4.08820655828388
NRXN3	15535	9369	neurexin 3	1.06428641231996	2.42097122202852	1.86707744954701	0.0696136155587734	0.671684062909174	-4.02289869859308
ZNF763	2845	284390	zinc finger protein 763	-0.362269278601454	2.56624867590731	-1.86686949017705	0.0696433895705389	0.671684062909174	-4.02117727667621
TBC1D8	6030	11138	TBC1 domain family member 8	0.481851022892974	5.09173095924947	1.86676288949234	0.0696586560445041	0.671684062909174	-4.09069145310975
SEC22C	8159	9117	SEC22 homolog C, vesicle trafficking protein	-0.195414564549633	5.22441447082759	-1.86654116248718	0.0696904191139373	0.671684062909174	-4.08897361090103
PNKD	5184	25953	PNKD metallo-beta-lactamase domain containing	0.305200052414973	2.63577010632761	1.86642778911236	0.0697066649715181	0.671684062909174	-4.01591165496019
GRAMD1B	13946	57476	GRAM domain containing 1B	-0.444752506570408	3.58094543254924	-1.86626209603099	0.0697304138047559	0.671684062909174	-4.02491732276679
JCHAIN	1680	3512	joining chain of multimeric IgA and IgM	0.843761140271988	6.90637109083459	1.86625268360399	0.0697317630976771	0.671684062909174	-4.12824442766599
NFE2L1	5825	4779	nuclear factor, erythroid 2 like 1	0.178495715795157	6.17565069096213	1.8662466946597	0.0697326216381293	0.671684062909174	-4.12680469480499
RPS27AP1	471	103911	ribosomal protein S27a pseudogene 1	-0.548728813105458	0.848362401882037	-1.86587663972135	0.0697856880802264	0.671684062909174	-4.08610604163535
NLRX1	5320	79671	NLR family member X1	0.473406290571902	3.68068682860572	1.86581156375129	0.0697950236360518	0.671684062909174	-4.03763649688935
LYSMD2	2074	256586	LysM domain containing 2	-0.383438497661003	3.54474454116251	-1.865406386087	0.0698531728922198	0.671684062909174	-4.02694973991427
ANO9	6207	338440	anoctamin 9	-0.50338989722362	3.54489085572319	-1.86479065053947	0.0699416196115412	0.671684062909174	-4.02849009452996
MRVI1	7700	10335	murine retrovirus integration site 1 homolog	0.420311486270384	6.18022912650612	1.86470387416843	0.069954092196708	0.671684062909174	-4.12900769204699
ENO2	4281	2026	enolase 2	-0.460783484576231	3.01460283549702	-1.86460337997812	0.0699685388500815	0.671684062909174	-4.01752580258671
PRO1804	2050	100133319	uncharacterized LOC100133319	-0.518858856583629	0.573200776822203	-1.86362946640704	0.0701086768053388	0.671684062909174	-4.18184196960857
METTL23	1914	124512	methyltransferase like 23	-0.25899216218403	3.6248936805579	-1.86345018625112	0.0701344997907063	0.671684062909174	-4.0285160500297
COLGALT2	7147	23127	collagen beta(1-O)galactosyltransferase 2	1.17220772755094	0.326116512992708	1.86193384182423	0.0703532343133303	0.671684062909174	-4.20748848146271
GFM1	9032	85476	G elongation factor mitochondrial 1	-0.217454008852767	5.56444739848161	-1.86192382146422	0.070354681695592	0.671684062909174	-4.10915624537043
COMMD2	4901	51122	COMM domain containing 2	-0.182091102894491	5.01261283735214	-1.86137288269559	0.0704343006691427	0.671684062909174	-4.08647239669348
ABHD18	6491	80167	abhydrolase domain containing 18	-0.141035570287936	5.72206479932184	-1.8605209779701	0.0705575650518866	0.671684062909174	-4.11962079998781
ROCK1	11113	6093	Rho associated coiled-coil containing protein kinase 1	0.200528756405667	8.51768597181067	1.85981198121119	0.0706602919160804	0.671684062909174	-4.12618831656535
PPP4R1L	9251	55370	protein phosphatase 4 regulatory subunit 1 like (pseudogene)	0.370824549620989	4.95973634122017	1.85946003936083	0.0707113322802757	0.671684062909174	-4.0939712556081
ZNF138	2850	7697	zinc finger protein 138	-0.251944484857827	4.3487269891505	-1.85940008918687	0.0707200296866023	0.671684062909174	-4.05677995911591
TMED8	7784	283578	transmembrane p24 trafficking protein family member 8	0.331812241857105	6.27406287289137	1.85918413839871	0.0707513667940051	0.671684062909174	-4.13880612805744
ADH5P4	1110	642443	ADH5 pseudogene 4	-0.490931419215225	1.67800299958821	-1.8589785554352	0.0707812104027776	0.671684062909174	-4.06602514810462
UBR4	24675	23352	ubiquitin protein ligase E3 component n-recognin 4	0.14667663664591	8.43421806854063	1.85833989776845	0.0708739901036239	0.671684062909174	-4.13066102993308
ERICH1	9726	157697	glutamate rich 1	0.312894633754002	6.35019686362428	1.85803456479149	0.0709183833548788	0.671684062909174	-4.14156732718867
MRPS28	1817	28957	mitochondrial ribosomal protein S28	-0.362491354372547	2.26265258863892	-1.85791748720984	0.0709354118918888	0.671684062909174	-4.03874564323183
UBE2G2	7388	7327	ubiquitin conjugating enzyme E2 G2	-0.179002643453358	6.40558459484529	-1.85772293486	0.0709637165796547	0.671684062909174	-4.14005134565326
PFDN6	2953	10471	prefoldin subunit 6	-0.243890235262072	2.82213743024815	-1.85758539638975	0.0709837323415766	0.671684062909174	-4.02621183332099
ACTB	3256	60	actin beta	0.252976767000913	10.6468557282468	1.85722371864511	0.0710363897152676	0.671684062909174	-4.08024534748374
NAP1L3	2639	4675	nucleosome assembly protein 1 like 3	-0.61781631826902	0.835596876791301	-1.8554209921758	0.0712993490436069	0.671684062909174	-4.15482914434474
NSDHL	1996	50814	NAD(P) dependent steroid dehydrogenase-like	0.243139037629852	2.25131695466985	1.85525058232612	0.0713242491727312	0.671684062909174	-4.04186393851447
NDUFB9	2629	4715	NADH:ubiquinone oxidoreductase subunit B9	-0.231678803753121	4.0747271423348	-1.85414500683796	0.0714859748891684	0.671684062909174	-4.05745154839357
GCNT2	9052	2651	glucosaminyl (N-acetyl) transferase 2 (I blood group)	-0.321013855230204	4.36932810596056	-1.85406681699073	0.0714974244713865	0.671684062909174	-4.06827145394782
MDS2	2142	259283	myelodysplastic syndrome 2 translocation associated	-0.914398582553091	0.0873218177914807	-1.85384065428126	0.0715305509753769	0.671684062909174	-4.23665105277626
MEF2A	6925	4205	myocyte enhancer factor 2A	0.336538027988874	6.75589958730549	1.85331622735984	0.0716074151526881	0.671684062909174	-4.15035589000416
GPATCH2	8833	55105	G-patch domain containing 2	-0.233917619996335	4.80309597016335	-1.85315514181051	0.0716310392524511	0.671684062909174	-4.08670561942354
NCR1	1893	9437	natural cytotoxicity triggering receptor 1	0.586876272080141	2.88700487616518	1.85220041199201	0.0717711920669762	0.671684062909174	-4.03306371427691
FH	2142	2271	fumarate hydratase	-0.247488654988404	3.87737790295153	-1.85194837837891	0.0718082291444308	0.671684062909174	-4.05283341808413
DYRK4	7054	8798	dual specificity tyrosine phosphorylation regulated kinase 4	-0.27404982144414	3.09317552154186	-1.85108232689827	0.0719356220473468	0.671684062909174	-4.03436803935163
RN7SL508P	303	106481061	RNA, 7SL, cytoplasmic 508, pseudogene	0.795248830063967	1.77922077916141	1.8504719227902	0.0720255257771481	0.671684062909174	-4.03476980283384
BOD1	2018	91272	biorientation of chromosomes in cell division 1	-0.339992822704734	3.27909470599582	-1.85019013261674	0.0720670616792408	0.671684062909174	-4.0372609856626
NOP10	554	55505	NOP10 ribonucleoprotein	0.275122377762356	5.71236991080061	1.84979228979656	0.0721257384787596	0.671684062909174	-4.13458374510946
HLA-DMA	2534	3108	major histocompatibility complex, class II, DM alpha	-0.368811255417105	5.46765893839324	-1.84975260910895	0.0721315931101664	0.671684062909174	-4.11928416736771
SLPI	596	6590	secretory leukocyte peptidase inhibitor	0.733370842668568	3.33372947595075	1.84946992236663	0.0721733134397098	0.671684062909174	-4.04230703694777
FASTKD3	2857	79072	FAST kinase domains 3	-0.184397027556926	3.25291677638703	-1.84855985496661	0.0723077653234219	0.671684062909174	-4.03903442325789
POC1A	2247	25886	POC1 centriolar protein A	0.404106205876321	0.725110432399147	1.84749123820598	0.0724659131604409	0.671684062909174	-4.14552978033554
KLHL9	5710	55958	kelch like family member 9	-0.143959663565734	6.05268144059479	-1.84744198221331	0.0724732097968308	0.671684062909174	-4.150371779819
EXOSC4	1407	54512	exosome component 4	0.647272378834911	1.71918141885167	1.84717119137876	0.0725133351165512	0.671684062909174	-4.06548562723289
ZNF439	5207	90594	zinc finger protein 439	-0.370156294672255	3.89582048813707	-1.84642421117043	0.0726241193902869	0.671684062909174	-4.05794127984229
AGAP2	6728	116986	ArfGAP with GTPase domain, ankyrin repeat and PH domain 2	0.32613830720157	4.76039035898935	1.84602604710861	0.0726832297395311	0.671684062909174	-4.11371046790811
NPIPB8	2338	728734	nuclear pore complex interacting protein family member B8	0.437450493735792	2.09241119198264	1.84600948840155	0.0726856888864513	0.671684062909174	-4.06018055834115
RPH3A	10369	22895	rabphilin 3A	1.51650743726841	-0.353894621234529	1.84543922150756	0.0727704228997422	0.671684062909174	-4.25656427909161
MRPL32	3534	64983	mitochondrial ribosomal protein L32	-0.250081564691846	4.30842455910949	-1.84535003829067	0.0727836819272374	0.671684062909174	-4.07529647585373
TRAV13-1	360	28671	T cell receptor alpha variable 13-1	-0.624399892131246	2.05996145540049	-1.84461227880929	0.072893444800387	0.671684062909174	-4.06659373067879
SLC25A16	7815	8034	solute carrier family 25 member 16	-0.18269347045625	4.60675428492698	-1.84448058220797	0.0729130532521088	0.671684062909174	-4.09324705496847
RN7SL8P	266	6034	RNA, 7SL, cytoplasmic 8, pseudogene	0.67152770765079	1.05344502595166	1.84404739252297	0.0729775830010411	0.671684062909174	-4.07197112484148
SIRT2	6224	22933	sirtuin 2	0.252743508129443	3.50878980839931	1.84392570127353	0.0729957193780959	0.671684062909174	-4.0576944491123
RMI2	2701	116028	RecQ mediated genome instability 2	-0.706193507150991	0.780127381833285	-1.84375093611153	0.0730217723862565	0.671684062909174	-4.16484865356737
PRSS23	11725	11098	serine protease 23	0.916821026263189	3.12123858391669	1.84360836092826	0.0730430325519025	0.671684062909174	-4.04385748701706
SRPK1	6692	6732	SRSF protein kinase 1	0.494872425185445	7.55673803397756	1.84344366890797	0.0730675972340764	0.671684062909174	-4.16418692360519
SERTAD3	2218	29946	SERTA domain containing 3	0.295696420102517	2.81305401028369	1.84187612342541	0.0733017568558112	0.671684062909174	-4.04503924152085
ZNF436-AS1	2655	148898	ZNF436 antisense RNA 1	-0.402650411076564	1.09310590554192	-1.84117414708384	0.0734068246520487	0.671684062909174	-4.1386187253941
TBC1D2B	9763	23102	TBC1 domain family member 2B	-0.168467829649152	6.58774280436348	-1.84116595060981	0.0734080522093234	0.671684062909174	-4.17145882137769
PHF13	3681	148479	PHD finger protein 13	0.284986464558013	2.48381901950682	1.84085463660351	0.0734546895446475	0.671684062909174	-4.04952537060893
DDX20	6019	11218	DEAD-box helicase 20	-0.197248778954025	4.92106317498278	-1.84085355288804	0.0734548519379136	0.671684062909174	-4.1125763759473
HLA-K	1046	3138	major histocompatibility complex, class I, K (pseudogene)	0.349496847946662	2.5210893442489	1.84052423650588	0.0735042136863463	0.671684062909174	-4.04654615219143
STIM1	7130	6786	stromal interaction molecule 1	0.20561212088221	5.88034486127139	1.8403992503054	0.0735229554461232	0.671684062909174	-4.1603989739222
CLCC1	4964	23155	chloride channel CLIC like 1	-0.207854470963794	4.956642662809	-1.83995041630928	0.0735902918855331	0.671684062909174	-4.11189691829227
ZNF787	3671	126208	zinc finger protein 787	0.421349046500422	3.56469022835443	1.83967098564932	0.073632240022025	0.671684062909174	-4.07272055947615
EEF1DP7	513	100422656	eukaryotic translation elongation factor 1 delta pseudogene 7	0.388509203667124	2.75447539408335	1.83922274925074	0.0736995717387661	0.671684062909174	-4.04805094274905
IRF2BP2	4724	359948	interferon regulatory factor 2 binding protein 2	-0.210341902202835	6.90237588654962	-1.83890980096974	0.0737466122085757	0.671684062909174	-4.17449383147997
GNAI3	27174	2773	G protein subunit alpha i3	0.206499864386998	8.33492861279658	1.83881619040944	0.0737606881332259	0.671684062909174	-4.161081268092
WSB1	8602	26118	WD repeat and SOCS box containing 1	0.347131468212984	8.4951764506439	1.83846464841166	0.0738135687888069	0.671684062909174	-4.15763927324313
SLC38A5	4014	92745	solute carrier family 38 member 5	0.544829802367359	3.6609825434495	1.83840594244755	0.0738224027645941	0.671684062909174	-4.07041532628396
LINC01473	1450	101927217	long intergenic non-protein coding RNA 1473	-0.388039150641222	1.78911383941058	-1.83799779825795	0.0738838444692165	0.671684062909174	-4.09022261023268
ZNF557	6018	79230	zinc finger protein 557	-0.20934330558054	5.21451928073531	-1.83787747136723	0.073901966678446	0.671684062909174	-4.12899977814471
MIR374B	72	100126317	microRNA 374b	0.496074083811139	0.500103305656662	1.837705828529	0.0739278240254656	0.671684062909174	-4.15732885719765
RPAP3	5381	79657	RNA polymerase II associated protein 3	-0.163681728511704	6.07679927171716	-1.83753300718593	0.0739538666782353	0.671684062909174	-4.16043450603592
PDK3	2695	5165	pyruvate dehydrogenase kinase 3	0.278026635342256	5.66423569895337	1.83682258990822	0.0740610022166582	0.671684062909174	-4.15788365609328
APOBR	3792	55911	apolipoprotein B receptor	0.41241681076241	6.42920321219956	1.83663795927036	0.0740888672998292	0.671684062909174	-4.18174174147024
HLA-DQA1	6927	3117	major histocompatibility complex, class II, DQ alpha 1	-0.500417871848413	5.84052000687592	-1.83633605779207	0.07413445049142	0.671684062909174	-4.15096427384994
TSEN15	2443	116461	tRNA splicing endonuclease subunit 15	-0.262589691450358	4.35203582552513	-1.8361316007618	0.0741653343733374	0.671684062909174	-4.09036307087013
RPUSD3	5348	285367	RNA pseudouridine synthase D3	-0.306850513134448	3.54921270785437	-1.83594607128921	0.0741933686484253	0.671684062909174	-4.06100566095588
TNNT3	2567	7140	troponin T3, fast skeletal type	0.673245386520946	0.989898839807856	1.83550501073299	0.074260050882187	0.671684062909174	-4.14689189793767
CLIP2	7315	7461	CAP-Gly domain containing linker protein 2	0.341268685729	2.71952577699428	1.83529699357707	0.0742915178557323	0.671684062909174	-4.05288735039781
TACC3	6528	10460	transforming acidic coiled-coil containing protein 3	0.308735088807172	6.0435083732617	1.83510539732744	0.0743205108434472	0.671684062909174	-4.1768514740548
PTMA	3378	5757	prothymosin alpha	-0.191916694567355	6.68836803078696	-1.83494030423522	0.0743455009942671	0.671684062909174	-4.17970598238157
TUBAP2	1613	399942	tubulin alpha pseudogene 2	0.28625314438625	3.97322897541683	1.83479067874584	0.0743681559797989	0.671684062909174	-4.0729057816202
TNFRSF1A	4005	7132	TNF receptor superfamily member 1A	0.287615742482496	6.17319347320242	1.83472029486105	0.0743788149214359	0.671684062909174	-4.17955943072802
POLR2A	8355	5430	RNA polymerase II subunit A	0.305952511443423	6.11103696393548	1.83422577366668	0.0744537418543744	0.671684062909174	-4.17659353819622
SNHG20	3118	654434	small nucleolar RNA host gene 20	-0.318757873226359	2.51982842282912	-1.83366794597403	0.0745383375610509	0.671684062909174	-4.05681529606802
LANCL3	10298	347404	LanC like 3	0.435005500578279	2.68597415983579	1.83293061265619	0.0746502809318579	0.671684062909174	-4.0559165957375
CEP290	10388	80184	centrosomal protein 290	-0.215450245575996	5.79897419032729	-1.83205794287423	0.074782955820747	0.671684062909174	-4.15969590379809
FOPNL	2391	123811	FGFR1OP N-terminal like	-0.187739847253235	5.22004418275444	-1.8318334446025	0.0748171194050727	0.671684062909174	-4.13788551975761
GLOD4	5603	51031	glyoxalase domain containing 4	-0.282700975502573	4.82875197400086	-1.83167667566451	0.0748409839672294	0.671684062909174	-4.11781751594597
TDP2	3082	51567	tyrosyl-DNA phosphodiesterase 2	0.288139502134079	7.25785046039957	1.83155191655332	0.0748599803683102	0.671684062909174	-4.1857082043014
MAP1A	10629	4130	microtubule associated protein 1A	0.46896381378796	3.09698446480703	1.83148413024768	0.0748703035422584	0.671684062909174	-4.05946363437232
COQ2	2774	27235	coenzyme Q2, polyprenyltransferase	0.32206260821025	3.92158837089945	1.83099366077695	0.074945033140566	0.671684062909174	-4.08194470193629
TNRC6C	11111	57690	trinucleotide repeat containing adaptor 6C	0.196992558347734	5.8805409854502	1.83045788232471	0.0750267385379017	0.671684062909174	-4.17227779880242
COPS8	4743	10920	COP9 signalosome subunit 8	-0.198580955071152	4.45763512807058	-1.83012151021574	0.0750780734061102	0.671684062909174	-4.10440456844114
KCTD17	2786	79734	potassium channel tetramerization domain containing 17	-0.450376421063961	1.11081596390959	-1.82991001281802	0.0751103659952145	0.671684062909174	-4.14273527266022
UST	4563	10090	uronyl 2-sulfotransferase	-0.436200169607786	2.19917614128173	-1.82962222278562	0.0751543263028079	0.671684062909174	-4.07623039838783
RPE	3522	6120	ribulose-5-phosphate-3-epimerase	-0.213381504711784	5.57662715420879	-1.82958342093018	0.0751602550080722	0.671684062909174	-4.15868311207093
STAG3L4	2501	64940	stromal antigen 3-like 4 (pseudogene)	-0.372850646220855	2.42132503202123	-1.82913374406793	0.0752289920702031	0.671684062909174	-4.0671798451091
STAU1	4094	6780	staufen double-stranded RNA binding protein 1	0.242511134877874	6.38317572476181	1.82884413635658	0.0752732893988011	0.671684062909174	-4.1863763967958
MAP2K3	3783	5606	mitogen-activated protein kinase kinase 3	0.47939674200313	6.48391945930177	1.82875041803577	0.0752876289486008	0.671684062909174	-4.19089356958757
DUSP19	5376	142679	dual specificity phosphatase 19	-0.367991266033965	2.05321818747724	-1.8285831961888	0.0753132208046327	0.671684062909174	-4.08173524345345
GIMAP4	2193	55303	GTPase, IMAP family member 4	-0.25956612040771	8.92831534190824	-1.82835570680438	0.0753480479399919	0.671684062909174	-4.16654975021198
RAC1	3114	5879	Rac family small GTPase 1	0.183458241611381	6.70583052087219	1.82773037564509	0.0754438524825736	0.671684062909174	-4.19049381324617
PCNA	1471	5111	proliferating cell nuclear antigen	-0.244171844363306	4.55086230345405	-1.82751814147869	0.0754763915382247	0.671684062909174	-4.11592223770325
TRIM38	9413	10475	tripartite motif containing 38	-0.231181674832109	7.56111830804657	-1.82721409050829	0.0755230284015757	0.671684062909174	-4.19085922715525
CACNA2D2	6322	9254	calcium voltage-gated channel auxiliary subunit alpha2delta 2	0.751281522264776	1.16388046687871	1.82703409149308	0.0755506490754363	0.671684062909174	-4.13157372547067
MRM3	2065	55178	mitochondrial rRNA methyltransferase 3	-0.358485033835057	2.6367027753968	-1.82687507679677	0.0755750568566669	0.671684062909174	-4.06321786141367
MTRF1	3841	9617	mitochondrial translation release factor 1	-0.196427836296091	4.9431941818604	-1.82682821800745	0.0755822506698773	0.671684062909174	-4.13266412374675
EIF1	3623	10209	eukaryotic translation initiation factor 1	0.294414057835833	6.73926696192964	1.82657164938793	0.0756216496696594	0.671684062909174	-4.19224816297277
RPSAP19	880	730029	ribosomal protein SA pseudogene 19	-0.337490896956773	3.35227072582125	-1.8259499922996	0.0757171843839419	0.671684062909174	-4.0687171855981
METTL21A	6798	151194	methyltransferase like 21A	-0.314138775475043	3.55775580590352	-1.82543648836941	0.0757961755973119	0.671684062909174	-4.07518001310122
ZSCAN32	4013	54925	zinc finger and SCAN domain containing 32	-0.175034058577865	4.49754231723177	-1.82358658252678	0.0760813224816863	0.671684062909174	-4.11637864586316
FAM76A	4034	199870	family with sequence similarity 76 member A	-0.252511727350013	3.61359054978293	-1.82224925696615	0.0762880257244567	0.671684062909174	-4.0799556718952
MIDN	4492	90007	midnolin	0.374924995388136	4.50787718788466	1.82203790112276	0.0763207374028112	0.671684062909174	-4.14350152091405
DNAJA3	7071	9093	DnaJ heat shock protein family (Hsp40) member A3	-0.317031808060695	4.4489530043637	-1.82057441723889	0.076547568179025	0.671684062909174	-4.12236464009904
KCTD6	3068	200845	potassium channel tetramerization domain containing 6	-0.355825535309436	3.01245685321538	-1.8205288311626	0.0765546429020747	0.671684062909174	-4.07085095856629
RN7SL546P	290	106479420	RNA, 7SL, cytoplasmic 546, pseudogene	0.539550971659749	2.0280170880444	1.81945882819824	0.0767208610878468	0.671684062909174	-4.07881156471903
EPM2A	5662	7957	EPM2A glucan phosphatase, laforin	-0.435080995829196	2.93996943588958	-1.81894445193262	0.0768008749935933	0.671684062909174	-4.0722596222607
TIMP2	5633	7077	TIMP metallopeptidase inhibitor 2	0.362963469748491	4.88691129469697	1.81826415176227	0.0769068078415114	0.671684062909174	-4.15648986854141
IL18BP	4323	10068	interleukin 18 binding protein	-0.408961979759612	2.49317551744621	-1.81769125865715	0.0769961118308245	0.671684062909174	-4.07634903093527
TAPBP	5056	6892	TAP binding protein	0.266920426779153	6.44108434883853	1.8175596364784	0.0770166418293189	0.671684062909174	-4.21065657292388
NFYA	3811	4800	nuclear transcription factor Y subunit alpha	0.149856839354099	6.13180980885564	1.81754962220686	0.0770182040126201	0.671684062909174	-4.19489216996884
PABPC3	3387	5042	poly(A) binding protein cytoplasmic 3	0.352611112410255	4.34400073364177	1.81749048747727	0.0770274293235669	0.671684062909174	-4.11753278358779
HHAT	6641	55733	hedgehog acyltransferase	-0.619389708816251	1.68620373933663	-1.81734172208717	0.0770506416025565	0.671684062909174	-4.11070122953449
PEX26	20045	55670	peroxisomal biogenesis factor 26	-0.211431854748272	5.18221275656129	-1.81724990543771	0.0770649709683295	0.671684062909174	-4.16403241975704
TPT1P10	496	101928715	tumor protein, translationally-controlled 1 pseudogene 10	0.462401557412732	2.08214301363729	1.81718131640184	0.0770756767898315	0.671684062909174	-4.08676253609061
SLC25A36	9277	55186	solute carrier family 25 member 36	-0.248185799788815	5.59971525740001	-1.81705436111426	0.0770954961192733	0.671684062909174	-4.17511930857588
LAS1L	5589	81887	LAS1 like ribosome biogenesis factor	-0.246689394301399	4.26184987845703	-1.81666271117907	0.0771566648475634	0.671684062909174	-4.11615903596938
COMMD10	2464	51397	COMM domain containing 10	-0.202770398109527	4.40864619585509	-1.8164403383453	0.0771914138118015	0.671684062909174	-4.12113596200932
TIMM50	6911	92609	translocase of inner mitochondrial membrane 50	-0.297171207564919	2.87941385218038	-1.81640852783257	0.0771963857472755	0.671684062909174	-4.07567151402519
FOXP1-IT1	3539	100506815	FOXP1 intronic transcript 1	0.314126612722175	4.3640738587645	1.81622766111931	0.0772246601005441	0.671684062909174	-4.12707429443774
NRBF2	1901	29982	nuclear receptor binding factor 2	0.319075854027751	6.12733349844817	1.81609629555092	0.0772452015873313	0.671684062909174	-4.19941782418007
CXCL8	2274	3576	C-X-C motif chemokine ligand 8	-0.979781380039831	3.98696607992579	-1.81607510798	0.0772485150975165	0.671684062909174	-4.09792177261383
ALAS2	2134	212	5'-aminolevulinate synthase 2	0.933482748265364	10.7193231991746	1.81570692447959	0.0773061143005985	0.671684062909174	-4.13312691371781
TPP1	4901	1200	tripeptidyl peptidase 1	0.262718837367964	5.91931431974778	1.81558365023157	0.0773254076449494	0.671684062909174	-4.19833244573616
BAG6	5310	7917	BCL2 associated athanogene 6	0.368854542209601	6.38060657802031	1.81539329775559	0.0773552072467131	0.671684062909174	-4.20787682788971
LATS2	5578	26524	large tumor suppressor kinase 2	0.331581496845001	4.31928635932805	1.81455177197509	0.0774870643499015	0.671684062909174	-4.12584794711308
CHN2	10660	1124	chimerin 2	-0.455943667028133	4.17313846085095	-1.81429717314523	0.0775269944546439	0.671684062909174	-4.11389705289383
DIMT1	3736	27292	DIMT1 rRNA methyltransferase and ribosome maturation factor	-0.243781665630443	4.0245763849771	-1.81402509813945	0.077569684702785	0.671684062909174	-4.1042451491269
RPSAP12	888	387867	ribosomal protein SA pseudogene 12	-0.476166657044637	2.25701420581852	-1.81347636240066	0.0776558452957929	0.671684062909174	-4.08580803039065
RTP4	1554	64108	receptor transporter protein 4	-0.661526543201551	3.46217881954039	-1.81346089309172	0.0776582754073981	0.671684062909174	-4.09078931797565
TMEM164	6583	84187	transmembrane protein 164	0.348837385234422	6.28111339853191	1.81292050813785	0.0777432062275693	0.671684062909174	-4.20749109330803
TFDP1	3741	7027	transcription factor Dp-1	0.587329547573841	7.28412842618354	1.81214326423382	0.0778655014233084	0.671684062909174	-4.2129230233467
RRP36	2212	88745	ribosomal RNA processing 36	-0.171300715103482	4.74609501210674	-1.8112164291283	0.0780115468746462	0.671684062909174	-4.14740757574137
ATG7	8833	10533	autophagy related 7	0.190829407143071	6.43378576251952	1.81102317666801	0.0780420277059576	0.671684062909174	-4.21291827446684
TANC2	22866	26115	tetratricopeptide repeat, ankyrin repeat and coiled-coil containing 2	0.327093416050216	5.45672682301797	1.81101272791095	0.0780436760281054	0.671684062909174	-4.18720951566926
MCTS2P	546	100101490	MCTS family member 2, pseudogene	-0.373645076647313	1.06239240005066	-1.81083479361861	0.0780717502101716	0.671684062909174	-4.1714136391446
UQCC1	6782	55245	ubiquinol-cytochrome c reductase complex assembly factor 1	-0.263351057665332	4.34128293629196	-1.81075318084256	0.0780846298000758	0.671684062909174	-4.12486647231872
KMT2C	20114	58508	lysine methyltransferase 2C	0.171288483790368	8.97644392902921	1.81011726665463	0.0781850471983353	0.671684062909174	-4.18872091407536
CSNK1D	11024	1453	casein kinase 1 delta	0.278832406891264	5.76725527991165	1.8098194759958	0.0782321089729354	0.671684062909174	-4.20638911741823
ZNF121	7251	7675	zinc finger protein 121	-0.256261215457417	6.07718155865133	-1.80936068521835	0.0783046615531968	0.671684062909174	-4.20560214552232
TGFA	4963	7039	transforming growth factor alpha	0.487597096925547	5.2521212146919	1.80919539824594	0.0783308137700721	0.671684062909174	-4.18326405946808
SRSF3	7118	6428	serine and arginine rich splicing factor 3	-0.113381835429561	7.55409918114151	-1.80900639365475	0.0783607277202149	0.671684062909174	-4.21752401824506
GTF2H3	3996	2967	general transcription factor IIH subunit 3	-0.343632097895802	4.00080112108944	-1.808937739352	0.0783715961002846	0.671684062909174	-4.11168264780093
COA3	1922	28958	cytochrome c oxidase assembly factor 3	-0.284127216707287	3.15547225178245	-1.80829409143083	0.0784735514054639	0.671684062909174	-4.08771416331424
MRC2	6860	9902	mannose receptor C type 2	0.735263013851601	3.94746349681415	1.80823087844465	0.0784835705368516	0.671684062909174	-4.13894225729891
COQ9	4324	57017	coenzyme Q9	-0.156925123978204	4.25939038767597	-1.80819734041425	0.0784888866867811	0.671684062909174	-4.12606425981418
EIF4BP2	1794	100129337	eukaryotic translation initiation factor 4B pseudogene 2	-0.444319513260287	1.4822102497909	-1.80739808533729	0.0786156676625116	0.671684062909174	-4.1462536614843
CEBPZOS	4698	100505876	CEBPZ opposite strand	0.202015478385471	4.54969774274774	1.80739606448414	0.0786159884376207	0.671684062909174	-4.13706963796168
MTMR10	8817	54893	myotubularin related protein 10	0.204921096324671	7.49953341090404	1.80719063623822	0.0786486023584624	0.671684062909174	-4.22029887067589
RPGR	7143	6103	retinitis pigmentosa GTPase regulator	0.239297540614998	5.48954971003525	1.80632980244394	0.0787853933915381	0.671684062909174	-4.19123879757529
GALNT12	3137	79695	polypeptide N-acetylgalactosaminyltransferase 12	-0.454099333164008	2.24699198297355	-1.80619526494448	0.0788067902840699	0.671684062909174	-4.09773137179246
YEATS4	1714	8089	YEATS domain containing 4	-0.388434020143378	3.41132185001286	-1.80596830963492	0.0788428964783182	0.671684062909174	-4.09511427277062
C2CD5	6759	9847	C2 calcium dependent domain containing 5	-0.106493691603893	6.72026923520493	-1.80537773653045	0.0789369160078355	0.671684062909174	-4.22235846048079
MXD1	6351	4084	MAX dimerization protein 1	0.315930426779852	10.0209671520246	1.80536424702763	0.0789390646505628	0.671684062909174	-4.1673149874102
SCAMP1	5106	9522	secretory carrier membrane protein 1	-0.146005643265056	5.66811561274036	-1.80520954587586	0.078963709384797	0.671684062909174	-4.19917587143821
MAPK14	6860	1432	mitogen-activated protein kinase 14	0.468313559704745	8.88849991680247	1.80485241889172	0.0790206265047576	0.671684062909174	-4.19469140263582
ETAA1	3486	54465	ETAA1 activator of ATR kinase	-0.291496398266625	4.23362030072831	-1.80468313512062	0.0790476182275783	0.671684062909174	-4.12610952506038
RBM4B	4325	83759	RNA binding motif protein 4B	-0.204707093379333	3.47202916923685	-1.80415986672512	0.0791311009007736	0.671684062909174	-4.09981364650912
RPS26	1943	6231	ribosomal protein S26	-0.370528880918736	2.3088476128517	-1.80348570593083	0.0792387669620406	0.671684062909174	-4.10120472912536
CD69	2832	969	CD69 molecule	-0.385569452490011	4.10047023719885	-1.80344437294987	0.0792453720252356	0.671684062909174	-4.12708884392118
EIF4E3	10779	317649	eukaryotic translation initiation factor 4E family member 3	0.256830313476526	8.35230757761334	1.8030041681209	0.0793157462037173	0.671684062909174	-4.21206192751065
CD19	2711	930	CD19 molecule	-0.569833038341141	1.91274759188729	-1.8029371520539	0.0793264644870032	0.671684062909174	-4.10569974169828
SSBP3	5227	23648	single stranded DNA binding protein 3	0.307540686305225	3.62524015254501	1.80278082608501	0.079351471400715	0.671684062909174	-4.11212453304675
RFNG	3865	5986	RFNG O-fucosylpeptide 3-beta-N-acetylglucosaminyltransferase	0.515351137118431	1.5120703196687	1.80250648341976	0.079395373139736	0.671684062909174	-4.11194741602872
RNU7-45P	63	100147832	RNA, U7 small nuclear 45 pseudogene	0.414047637354635	2.69387555218124	1.80227465081654	0.0794324882033715	0.671684062909174	-4.09125554137582
ANO10	5287	55129	anoctamin 10	0.331064475138773	4.44879975007641	1.8021380218051	0.079454368588945	0.671684062909174	-4.14851804167339
RBM45	4784	129831	RNA binding motif protein 45	-0.213875121210409	3.97011240769639	-1.80212039425898	0.0794571919146524	0.671684062909174	-4.12253518158097
FARSB	3369	10056	phenylalanyl-tRNA synthetase subunit beta	-0.211219094229006	4.38849666059143	-1.80209569942086	0.0794611473197278	0.671684062909174	-4.14033497310909
MEMO1	5220	7795	Methylation modifier for class I HLA	0.226108650918043	3.76054497169893	1.80200263483466	0.0794760550939235	0.671684062909174	-4.11405487222465
LTV1	1847	84946	LTV1 ribosome biogenesis factor	-0.267582165320093	3.79512098584785	-1.8018392644607	0.0795022306874801	0.671684062909174	-4.11061829788761
SHC1	4342	6464	SHC adaptor protein 1	0.222893980034831	4.22446521026797	1.80161276517563	0.0795385330015875	0.671684062909174	-4.13984739049117
TMED4	3769	222068	transmembrane p24 trafficking protein 4	-0.129678701874876	5.64940623658446	-1.80118460253149	0.0796071953141358	0.671684062909174	-4.20980460178168
CTBP2	10946	1488	C-terminal binding protein 2	0.245274181160381	6.03263519906702	1.80089770130101	0.0796532322631483	0.671684062909174	-4.22138817589376
SDCBPP3	891	100131656	syndecan binding protein pseudogene 3	0.353732305843432	3.6898305557953	1.8001935587117	0.0797663162802209	0.671684062909174	-4.11642107733124
FHOD1	5407	29109	formin homology 2 domain containing 1	0.367517716057447	2.90259877017516	1.80011627853316	0.0797787355943777	0.671684062909174	-4.09818184232847
ABHD13	5338	84945	abhydrolase domain containing 13	0.156750703390174	6.43066269426387	1.79954577320676	0.0798704692425019	0.671684062909174	-4.22929370041657
GPR108	3213	56927	G protein-coupled receptor 108	0.294209813444535	4.94834925952371	1.7992808047857	0.079913104790376	0.671684062909174	-4.18696253257229
GEMIN2	2532	8487	gem nuclear organelle associated protein 2	-0.358233460341588	1.85900922761293	-1.79877226791323	0.0799949863313165	0.671684062909174	-4.12161619559183
RWDD3	1982	25950	RWD domain containing 3	-0.296423067188091	3.08884277067943	-1.79852453540857	0.0800349003952149	0.671684062909174	-4.0983503791713
PRMT5	3467	10419	protein arginine methyltransferase 5	0.322435763571473	4.94573978832027	1.79849796082366	0.0800391830273578	0.671684062909174	-4.18078013256885
ZNF737	3539	100129842	zinc finger protein 737	-0.321585644157913	4.87723927244092	-1.79834829817161	0.0800633055553752	0.671684062909174	-4.1683397023789
DNAJB12	5649	54788	DnaJ heat shock protein family (Hsp40) member B12	0.220691741194749	5.39571295302455	1.79777057190308	0.0801564807196948	0.671684062909174	-4.20685399352292
ATP10D	7965	57205	ATPase phospholipid transporting 10D (putative)	-0.284976728369001	5.79857344847558	-1.79765104845766	0.0801757687831983	0.671684062909174	-4.20885160227926
TRIM2	9425	23321	tripartite motif containing 2	-0.593996851932024	2.12922422731673	-1.79739874205742	0.0802164975336541	0.671684062909174	-4.11069605388175
SUPT6H	10620	6830	SPT6 homolog, histone chaperone and transcription elongation factor	0.140078516290658	6.79307195007559	1.79721476435027	0.0802462072904795	0.671684062909174	-4.23582434861687
YARS2	2152	51067	tyrosyl-tRNA synthetase 2	-0.243979183848885	3.56426504578308	-1.79686890622572	0.0803020835691973	0.671684062909174	-4.11149512652762
FCGR2A	5314	2212	Fc fragment of IgG receptor IIa	0.325637457357338	9.88043162368869	1.79672323483543	0.0803256278368379	0.671684062909174	-4.18389401533973
CEP76	6158	79959	centrosomal protein 76	-0.270410313000073	3.23550227055915	-1.79669186829176	0.080330698245085	0.671684062909174	-4.1041575288005
SNRPB2	2607	6629	small nuclear ribonucleoprotein polypeptide B2	-0.213341178221873	4.3381902214798	-1.79660641820112	0.0803445126411919	0.671684062909174	-4.14604450937301
ZNF461	4204	92283	zinc finger protein 461	-0.364587049811873	2.57440946512477	-1.79642900965962	0.0803732000229928	0.671684062909174	-4.09931216090615
HMGCR	6215	3156	3-hydroxy-3-methylglutaryl-CoA reductase	0.20356394264016	6.87670720258875	1.79631531477327	0.0803915893038729	0.671684062909174	-4.23816811133477
LRRN1	4264	57633	leucine rich repeat neuronal 1	0.784981517666645	2.35029909564364	1.7959928677456	0.0804437619823567	0.671684062909174	-4.09918821490162
HSPB11	3236	51668	heat shock protein family B (small) member 11	-0.189821857178358	4.36870768689035	-1.79549793307043	0.0805238991916136	0.671684062909174	-4.14436476741025
HIPK1	9280	204851	homeodomain interacting protein kinase 1	0.266650111979835	8.76727494268463	1.79537744057601	0.0805434189007473	0.671684062909174	-4.21382612371152
NFE2L2	5979	4780	nuclear factor, erythroid 2 like 2	0.178816800127697	7.46723896774083	1.79502750386723	0.0806001310839806	0.671684062909174	-4.23722749184993
PHB	3838	5245	prohibitin	-0.278004483510778	3.84659178172299	-1.79484980249738	0.0806289430057439	0.671684062909174	-4.128584115192
ZNF202	4808	7753	zinc finger protein 202	-0.301828110155922	3.64048690535941	-1.79399594023578	0.0807675067670712	0.671684062909174	-4.11746810862841
CTSK	1887	1513	cathepsin K	0.375286880885931	2.30294446698082	1.79329237998118	0.0808818307178975	0.671684062909174	-4.10659088398029
TMEM251	1365	26175	transmembrane protein 251	-0.262334117039697	2.21602832161556	-1.79310191737025	0.0809128031350365	0.671684062909174	-4.10773853111431
SPATA5	8247	166378	spermatogenesis associated 5	-0.220188983898533	4.97205049712939	-1.7930291026338	0.0809246466783919	0.671684062909174	-4.18181834237945
TADA3	4234	10474	transcriptional adaptor 3	0.272886501738673	4.91163833402279	1.79140873780462	0.0811885829052996	0.671684062909174	-4.19297333997582
CLU	6616	1191	clusterin	0.466258486638025	5.04004569548751	1.79133737963573	0.08120022289872	0.671684062909174	-4.19249582896689
LIMK1	6902	3984	LIM domain kinase 1	0.369453445116032	3.01827170713497	1.79116928146424	0.0812276487541521	0.671684062909174	-4.11040230907769
IFIH1	4528	64135	interferon induced with helicase C domain 1	-0.494070508971023	6.3539370359738	-1.79096637499776	0.0812607641274378	0.671684062909174	-4.23958437647466
CBR1	2450	873	carbonyl reductase 1	-0.375542696487376	3.31248662784112	-1.79083626185995	0.0812820052515678	0.671684062909174	-4.11495261070349
NACC2	7212	138151	NACC family member 2	0.251574428139713	5.4279011085752	1.79073304354459	0.0812988590964896	0.671684062909174	-4.22770601310418
AK3	4483	50808	adenylate kinase 3	-0.198366730382419	4.74345054548255	-1.79057709572986	0.0813243283903773	0.671684062909174	-4.17090421417785
RAPGEFL1	5711	51195	Rap guanine nucleotide exchange factor like 1	0.521886941398923	1.75705814403516	1.79019581739182	0.0813866268703989	0.671684062909174	-4.11799479968854
PON2	3843	5445	paraoxonase 2	-0.355570223758092	2.57275872426748	-1.78981291132493	0.0814492318312595	0.671684062909174	-4.10763324032651
FOXJ2	6296	55810	forkhead box J2	0.30180552251556	4.16335317645604	1.78919304289062	0.0815506661520464	0.671684062909174	-4.15671489218606
ZNF876P	2804	642280	zinc finger protein 876, pseudogene	-0.544096440266958	1.74870361336471	-1.78847593558813	0.0816681454267822	0.671684062909174	-4.13894557088813
TMEM50B	4495	757	transmembrane protein 50B	-0.258057453747378	4.80780635848036	-1.7877342539615	0.0817898007056412	0.671684062909174	-4.18327438796134
ITFG2	6250	55846	integrin alpha FG-GAP repeat containing 2	-0.279424436119986	4.73355787778698	-1.78746756834918	0.0818335814988081	0.671684062909174	-4.1783304133254
MOCS2	6010	4338	molybdenum cofactor synthesis 2	-0.3131972982844	3.23688455579818	-1.78744162837854	0.0818378410226451	0.671684062909174	-4.11305687298253
WDR74	4247	54663	WD repeat domain 74	-0.296781613873212	3.67190639213123	-1.7870944598988	0.0818948665048921	0.671684062909174	-4.13052403713004
PRKAB2	5460	5565	protein kinase AMP-activated non-catalytic subunit beta 2	-0.155114846500443	4.91481346175553	-1.78674914889374	0.0819516201191177	0.671684062909174	-4.18833114434137
HDHD2	4704	84064	haloacid dehalogenase like hydrolase domain containing 2	-0.212292836213536	5.17170200126636	-1.78616530185949	0.0820476537854373	0.671684062909174	-4.19533532536004
LSM5	4701	23658	LSM5 homolog, U6 small nuclear RNA and mRNA degradation associated	-0.338521176009906	3.40577438218227	-1.78604748585255	0.0820670441698266	0.671684062909174	-4.12128326245572
CCZ1	6431	51622	CCZ1 homolog, vacuolar protein trafficking and biogenesis associated	-0.223597183445421	3.88176326420405	-1.78540824928285	0.0821723183193093	0.671684062909174	-4.13982741347477
LYRM7	6351	90624	LYR motif containing 7	-0.339125266108767	4.84996499043342	-1.78495951610778	0.082246286974513	0.671684062909174	-4.1843627230814
TMA16	3513	55319	translation machinery associated 16 homolog	-0.280359416699772	3.76561769508709	-1.78463782022826	0.0822993494885585	0.671684062909174	-4.1342304519157
KCNH3	4265	23416	potassium voltage-gated channel subfamily H member 3	0.796094484248074	0.750973599849941	1.78431689688723	0.0823523133280569	0.671684062909174	-4.17253783836807
ZDHHC3	7609	51304	zinc finger DHHC-type containing 3	0.265612084195717	6.17805018842725	1.78403228054737	0.0823993092502014	0.671684062909174	-4.248285919254
ZNF839	5590	55778	zinc finger protein 839	0.213045010935004	4.05241354038202	1.78347885814798	0.0824907552130947	0.671684062909174	-4.15363262533744
CYP2R1	4516	120227	cytochrome P450 family 2 subfamily R member 1	-0.225106785272011	3.635221936474	-1.78326551156973	0.0825260308388126	0.671684062909174	-4.1339071346509
INTS3	10450	65123	integrator complex subunit 3	0.207221547932036	5.83548480033354	1.78310730900485	0.0825521969286943	0.671684062909174	-4.24292217270634
CRYGS	2151	1427	crystallin gamma S	-0.469819536961201	2.11013477684848	-1.7830003817689	0.0825698862380608	0.671684062909174	-4.12814114509234
ZNF696	4012	79943	zinc finger protein 696	-0.554912883600803	1.55276514951566	-1.78279193226755	0.0826043798796049	0.671684062909174	-4.13765183314078
TMX2	2246	51075	thioredoxin related transmembrane protein 2	-0.261223119045262	4.13395144004296	-1.78237022019564	0.0826742007527127	0.671684062909174	-4.1551776423315
ZBED6	4250	100381270	zinc finger BED-type containing 6	0.204460854395632	5.3203733748712	1.78171068895379	0.0827834959269891	0.671684062909174	-4.22061713247202
MEAF6	3487	64769	MYST/Esa1 associated factor 6	-0.228818707608482	4.80104603460037	-1.78135676276547	0.082842197497793	0.671684062909174	-4.19104850718598
RAD51D	11304	5892	RAD51 paralog D	-0.295627249007961	3.88099459159447	-1.78119544062685	0.0828689657360772	0.671684062909174	-4.14452885054476
ZNF197	6767	10168	zinc finger protein 197	-0.184185492457138	4.89647331814636	-1.78100204746483	0.0829010651346875	0.671684062909174	-4.19519399602024
MTMR9	8804	66036	myotubularin related protein 9	-0.139550757757358	5.61979973672114	-1.78089986550009	0.0829180295273217	0.671684062909174	-4.22980810857199
PCF11-AS1	1516	106736475	PCF11 antisense RNA 1	-0.466125367614584	1.06735891025227	-1.78087806467882	0.0829216493086901	0.671684062909174	-4.19066464974728
CCDC17	3323	149483	coiled-coil domain containing 17	0.319866313673338	3.15507612287302	1.78066977975417	0.0829562393922025	0.671684062909174	-4.12522703570508
CAP1	3814	10487	cyclase associated actin cytoskeleton regulatory protein 1	0.219662673867376	8.58244843272558	1.77954004332725	0.0831440676834135	0.671684062909174	-4.24158714016193
FAR1	7501	84188	fatty acyl-CoA reductase 1	0.23553739440318	7.9520730230091	1.77925074820897	0.0831922230277947	0.671684062909174	-4.25464538481972
TMEM237	7647	65062	transmembrane protein 237	-0.475045401698419	1.380834519136	-1.77912882603306	0.0832125249247109	0.671684062909174	-4.16815075682217
COX18	6976	285521	cytochrome c oxidase assembly factor COX18	-0.208631835731384	4.1869656912313	-1.77892061849769	0.0832472042941916	0.671684062909174	-4.1625822793594
PI3	577	5266	peptidase inhibitor 3	0.858034490953399	3.91759113155393	1.77891588631144	0.0832479926359164	0.671684062909174	-4.15201640833487
CMBL	3324	134147	carboxymethylenebutenolidase homolog	0.88699719373404	0.852895664999928	1.77875609712842	0.0832746158370306	0.671684062909174	-4.17976664524494
GCSAM	3783	257144	germinal center associated signaling and motility	-0.517900066374138	3.85387708778517	-1.77851181932773	0.0833153299306226	0.671684062909174	-4.14365805830181
CA15P1	905	100996435	CA15 pseudogene 1	0.720604503524561	0.0648117367594736	1.77810150211182	0.0833837557547432	0.671684062909174	-4.21264905039985
SLC30A5	5784	64924	solute carrier family 30 member 5	-0.146808327189928	5.65542730848841	-1.77802048683427	0.0833972717171628	0.671684062909174	-4.23753566501388
LRRFIP1	11901	9208	LRR binding FLII interacting protein 1	0.19294430907593	9.01965586769415	1.77782951528142	0.0834291392346354	0.671684062909174	-4.23492038349325
MPHOSPH10	4673	10199	M-phase phosphoprotein 10	-0.28712021001865	5.13807229883171	-1.77735357845454	0.0835086036729304	0.671684062909174	-4.2030110288032
ANKRD55	2979	79722	ankyrin repeat domain 55	0.562433638471219	2.42902154804275	1.77718584139642	0.0835366249505531	0.671684062909174	-4.12226399054417
TRADD	2567	8717	TNFRSF1A associated via death domain	-0.216272503010638	4.25355582615142	-1.77674884086911	0.0836096651610942	0.671684062909174	-4.17996907668853
ENC1	5858	8507	ectodermal-neural cortex 1	0.684411945386718	4.24810244095492	1.77608090922845	0.0837214070599287	0.671684062909174	-4.17094942883296
RNLS	3933	55328	renalase, FAD dependent amine oxidase	-0.404907761212385	0.777567973433843	-1.77575097558967	0.0837766498169075	0.671684062909174	-4.21794751547172
IRF8	5162	3394	interferon regulatory factor 8	-0.302563795128454	5.76612418475581	-1.77552566246765	0.0838143929668045	0.671684062909174	-4.24307615259628
TMEM243	3271	79161	transmembrane protein 243	-0.245026589748417	4.71620982783655	-1.77549461630749	0.0838195947616967	0.671684062909174	-4.19637742907919
SNTB2	9875	6645	syntrophin beta 2	0.275359886177634	5.77075573397432	1.7745947291162	0.0839704893108737	0.671684062909174	-4.25090328246598
ANGEL2	7276	90806	angel homolog 2	-0.162761009055106	6.02559624294343	-1.77404254857653	0.0840631929814402	0.671684062909174	-4.25632053605324
ZNF92	3512	168374	zinc finger protein 92	-0.381178929088699	5.089623618657	-1.77350712661801	0.0841531653470353	0.671684062909174	-4.21561735835641
INPP4B	14153	8821	inositol polyphosphate-4-phosphatase type II B	-0.384048849647307	7.37413595454532	-1.77343520655982	0.0841652569729137	0.671684062909174	-4.2709568255745
B9D2	1316	80776	B9 domain containing 2	0.416109144696182	2.74567280866434	1.77329398034378	0.0841890050144502	0.671684062909174	-4.12764924841047
LINC00662	7958	148189	long intergenic non-protein coding RNA 662	-0.28460502039026	3.6298080172887	-1.77284177068967	0.084265084736144	0.671684062909174	-4.14210907664939
SLC25A12	5169	8604	solute carrier family 25 member 12	-0.223378624407041	4.38951241809148	-1.77273658914576	0.0842827887620926	0.671684062909174	-4.17940252048857
RPS3AP47	792	146053	ribosomal protein S3a pseudogene 47	-0.505848749640036	1.17961167161175	-1.77266793204341	0.0842943467278196	0.671684062909174	-4.16835845814485
MME	9620	4311	membrane metalloendopeptidase	0.504831818463176	9.73982836549603	1.77244269292913	0.0843322735962892	0.671684062909174	-4.21992656640122
MRPS18C	4866	51023	mitochondrial ribosomal protein S18C	-0.185767334884779	4.16700032638468	-1.77163377964146	0.0844686007796839	0.671684062909174	-4.17096576960095
MCPH1	9775	79648	microcephalin 1	-0.249204618942112	5.36889240452915	-1.77162743198743	0.0844696712905686	0.671684062909174	-4.22779312072399
CTDNEP1	2584	23399	CTD nuclear envelope phosphatase 1	0.291105029433725	3.29639434438253	1.77138414521262	0.0845107094038944	0.671684062909174	-4.14092405602683
RAB3IL1	3006	5866	RAB3A interacting protein like 1	0.893030271603933	0.332418388715703	1.77128927113582	0.0845267175031328	0.671684062909174	-4.22995071143918
EIF5A	2815	1984	eukaryotic translation initiation factor 5A	0.24785150768221	4.73012317218174	1.77126996016228	0.0845299761553504	0.671684062909174	-4.21755253989299
SNORA54	123	677833	small nucleolar RNA, H/ACA box 54	-0.331627121885107	3.65260950823544	-1.77117436995231	0.0845461081904709	0.671684062909174	-4.16965682510818
MAP3K2	11508	10746	mitogen-activated protein kinase kinase kinase 2	0.232615095969345	9.26331584738201	1.77047404924118	0.0846643750136133	0.671684062909174	-4.23756535636274
KIAA1143	5259	57456	KIAA1143	-0.236225256457992	5.22672422260952	-1.7700294967593	0.0847395210933023	0.671684062909174	-4.22720060029594
ZNF268	14095	10795	zinc finger protein 268	-0.226233433356938	5.0087092497763	-1.76994327882793	0.0847541016573042	0.671684062909174	-4.21573372826853
HM13	10000	81502	histocompatibility minor 13	-0.189214928892599	5.20556855670925	-1.76945143432094	0.0848373192616484	0.671684062909174	-4.23705812846678
GNAI1	4547	2770	G protein subunit alpha i1	-0.656027693553879	0.797700745856713	-1.76916422952274	0.0848859446311338	0.671684062909174	-4.21698509696435
TBKBP1	4280	9755	TBK1 binding protein 1	0.561320171224529	2.95860762409637	1.76895229918222	0.084921840642077	0.671684062909174	-4.13938857001326
RPS27P29	252	100132291	ribosomal protein S27 pseudogene 29	-0.366127574555036	1.56273499415015	-1.76894984590994	0.0849222562433744	0.671684062909174	-4.15756162984054
IL1RN	3256	3557	interleukin 1 receptor antagonist	0.403179885440809	5.22786129052628	1.76883196152798	0.084942228688978	0.671684062909174	-4.23800687237104
CEP95	8048	90799	centrosomal protein 95	-0.221141087687321	5.50626046112096	-1.76866398789177	0.0849706942808345	0.671684062909174	-4.2396367944488
CUL5	6742	8065	cullin 5	-0.151107331119584	6.22615575755576	-1.76829737883325	0.0850328494111438	0.671684062909174	-4.26837592246842
AGO3	21157	192669	argonaute RISC catalytic component 3	-0.169320930439122	6.80896211717218	-1.76789220673488	0.085101587009586	0.671684062909174	-4.27812530775091
VASP	3601	7408	vasodilator stimulated phosphoprotein	0.294034018771725	7.89263896745497	1.7678187491967	0.0851140541097291	0.671684062909174	-4.27012055360253
GPD2	7155	2820	glycerol-3-phosphate dehydrogenase 2	-0.231777225887096	6.02286103374941	-1.7672358285266	0.0852130409562079	0.671684062909174	-4.26617958389791
LINC01001	3823	100133161	long intergenic non-protein coding RNA 1001	0.471429640014859	1.07150050330518	1.76718189284687	0.0852222047641267	0.671684062909174	-4.17745189211639
LIG1	6576	3978	DNA ligase 1	-0.360894379342103	3.39345056027882	-1.76707658059279	0.0852400999694885	0.671684062909174	-4.14715494904627
CHD8	9781	57680	chromodomain helicase DNA binding protein 8	0.112207677336369	7.7422543494261	1.76688294223011	0.0852730122499567	0.671684062909174	-4.27589101233944
CCDC102B	5805	79839	coiled-coil domain containing 102B	-0.352409670859039	1.7519428151577	-1.76646654610317	0.0853438223551713	0.671824023586451	-4.15996808084703
UTP15	6321	84135	UTP15 small subunit processome component	-0.23643702226074	4.33868403206649	-1.76600030903165	0.0854231667913018	0.671964376372558	-4.18333744653537
RASSF3	4226	283349	Ras association domain family member 3	0.217224366864269	7.4129475819709	1.76573845146527	0.0854677570137526	0.671964376372558	-4.28180236466999
C14orf93	4243	60686	chromosome 14 open reading frame 93	-0.242200161672997	2.98940671354208	-1.76501005619426	0.0855918941640468	0.672522910348521	-4.13701760087681
BPHL	5780	670	biphenyl hydrolase like	-0.42907976212965	1.57614012598816	-1.76358791892214	0.0858346993824283	0.674012586719056	-4.16568832757533
EIF2B5	5702	8893	eukaryotic translation initiation factor 2B subunit epsilon	-0.215580910045542	5.6046382867171	-1.76216625020221	0.0860780027400593	0.674646737349672	-4.25586807421255
ZNF347	9131	84671	zinc finger protein 347	-0.342200668565048	4.07148781581415	-1.76194865930177	0.0861152921574993	0.674646737349672	-4.17434816032507
CPT1B	4102	1375	carnitine palmitoyltransferase 1B	-0.561806520912255	1.25197977258948	-1.76185470156817	0.0861313982616364	0.674646737349672	-4.18552250587777
RPAIN	7430	84268	RPA interacting protein	-0.269596933855118	4.92033849225544	-1.76159435123979	0.0861760403720934	0.674646737349672	-4.22190532858983
DNAJB9	2837	4189	DnaJ heat shock protein family (Hsp40) member B9	-0.204245495788045	4.44308117435841	-1.7599517752143	0.0864581401504224	0.674646737349672	-4.20509682570247
MAP4K3	6067	8491	mitogen-activated protein kinase kinase kinase kinase 3	-0.20109498327939	4.57382036373108	-1.75974328663281	0.0864940018528143	0.674646737349672	-4.20368924374594
ARFGEF1	10964	10565	ADP ribosylation factor guanine nucleotide exchange factor 1	0.117101108680918	8.10960536623809	1.75954027643887	0.0865289332293817	0.674646737349672	-4.28088795578817
DRAM1	4180	55332	DNA damage regulated autophagy modulator 1	0.331336932628535	4.470120134039	1.75868620187992	0.0866760211269491	0.674646737349672	-4.20905335722683
ATRAID	2019	51374	all-trans retinoic acid induced differentiation factor	-0.212032705384708	4.55877946621971	-1.75851586963462	0.0867053806729305	0.674646737349672	-4.21276131363645
MOCS3	5106	27304	molybdenum cofactor synthesis 3	-0.210983528431862	2.92799907990822	-1.75797946023444	0.0867978941458322	0.674646737349672	-4.14432291024877
HPS1	5301	3257	HPS1 biogenesis of lysosomal organelles complex 3 subunit 1	0.455463230041201	6.13206003763028	1.75784952078876	0.0868203170084871	0.674646737349672	-4.29188654386149
HNRNPH1	9480	3187	heterogeneous nuclear ribonucleoprotein H1	-0.19425536634424	9.37378989658188	-1.75770605088208	0.0868450803884829	0.674646737349672	-4.25701203118709
ELP2	11068	55250	elongator acetyltransferase complex subunit 2	-0.254950114472663	6.05463052226967	-1.75760691301172	0.0868621953759257	0.674646737349672	-4.27809599457171
RNU4ATAC16P	126	106481160	RNA, U4atac small nuclear 16, pseudogene	0.546563394526104	0.927973546962192	1.75753432923144	0.0868747279070563	0.674646737349672	-4.22147529370763
MAP9	8857	79884	microtubule associated protein 9	-0.387322860076138	2.90472500336878	-1.75676997077919	0.0870067964733849	0.674646737349672	-4.14354173333632
AVIL	5889	10677	advillin	0.333263158256638	4.82139552169529	1.75669479543674	0.0870197946317542	0.674646737349672	-4.2312127554351
MMP25	4126	64386	matrix metallopeptidase 25	0.465992911265638	7.33027703096886	1.7566066005245	0.087035046010248	0.674646737349672	-4.29478263546643
ELOVL1	2507	64834	ELOVL fatty acid elongase 1	0.179286903712086	5.06942451209264	1.75657675580636	0.0870402075085606	0.674646737349672	-4.24610623169454
SKAP2	5520	8935	src kinase associated phosphoprotein 2	0.333594111601364	7.18005474403234	1.75645183034363	0.0870618155455705	0.674646737349672	-4.29576445566822
MILR1	1816	284021	mast cell immunoglobulin like receptor 1	-0.5428926783385	4.42666855354621	-1.7563969775006	0.0870713047233236	0.674646737349672	-4.19670619487909
AQR	13528	9716	aquarius intron-binding spliceosomal factor	-0.121083687926724	7.19024879518473	-1.75560481977572	0.0872084395500077	0.674646737349672	-4.29645577774259
PNRC2P1	420	100131261	proline rich nuclear receptor coactivator 2 pseudogene 1	-0.219539389913893	4.21041974663144	-1.75483006519355	0.0873427368702191	0.674646737349672	-4.19150247211331
LRRC40	2884	55631	leucine rich repeat containing 40	-0.18206720550462	4.66349349558513	-1.7548205804442	0.08734438204779	0.674646737349672	-4.21830186187177
SRSF10	10277	10772	serine and arginine rich splicing factor 10	-0.148107385322737	7.05039974389831	-1.75411211160548	0.0874673430549149	0.674646737349672	-4.29850723023944
GIMAP6	3913	474344	GTPase, IMAP family member 6	-0.284605170745573	7.34580644973457	-1.75391698545269	0.0875012344100741	0.674646737349672	-4.2987762404837
TSPYL2	4948	64061	TSPY like 2	-0.358022942218334	3.65819433800387	-1.75340733339381	0.0875898075614567	0.674646737349672	-4.17044001561665
ACVR1B	5690	91	activin A receptor type 1B	0.362110051792055	4.51986660414353	1.75307242057108	0.0876480534705555	0.674646737349672	-4.21726339863565
SNAPC1	2656	6617	small nuclear RNA activating complex polypeptide 1	-0.37516501984468	2.6502653075873	-1.75297492988005	0.0876650145350083	0.674646737349672	-4.14657503205374
PGPEP1	7520	54858	pyroglutamyl-peptidase I	0.185014665865014	4.39232579703846	1.75287076823332	0.0876831392289401	0.674646737349672	-4.21594986618405
CHST15	6554	51363	carbohydrate sulfotransferase 15	0.333641563438549	8.53128147201399	1.75276298113058	0.0877018980805991	0.674646737349672	-4.27960719174207
PCIF1	3219	63935	PDX1 C-terminal inhibiting factor 1	0.278063833226996	4.53090871589189	1.75248022662392	0.0877511235804596	0.674646737349672	-4.2279222495846
RRP7A	4082	27341	ribosomal RNA processing 7 homolog A	-0.320067455812374	4.19415075078421	-1.7523528666754	0.0877733035873903	0.674646737349672	-4.20297944008318
IFIT2	4101	3433	interferon induced protein with tetratricopeptide repeats 2	-0.52166073389937	9.16683087165642	-1.75192510309488	0.0878478339441227	0.674646737349672	-4.26532167173835
MIOS	6714	54468	meiosis regulator for oocyte development	-0.151825888494843	5.40938101100957	-1.75182687450798	0.0878649560555031	0.674646737349672	-4.26226346949548
USP22	6808	23326	ubiquitin specific peptidase 22	0.20939004079561	5.99902918438495	1.75180570189337	0.0878686469960375	0.674646737349672	-4.29122769556583
GNA13	5104	10672	G protein subunit alpha 13	0.168425747171707	8.55367343178608	1.75128544518434	0.0879593822031727	0.674646737349672	-4.28222232165925
CCR4	3095	1233	C-C motif chemokine receptor 4	-0.492834497222471	4.79262747730759	-1.75097700731619	0.0880132122962958	0.674646737349672	-4.2302224112473
EXOSC3	3023	51010	exosome component 3	-0.129552811319355	4.53911873307453	-1.75087528790617	0.0880309709231498	0.674646737349672	-4.219381026386
PKM	8571	5315	pyruvate kinase M1/2	0.26010159137255	6.77651018433288	1.75079945010622	0.0880442129781932	0.674646737349672	-4.30186331744942
TCERG1	8714	10915	transcription elongation regulator 1	-0.197651991181168	6.15556149925369	-1.75078902621962	0.088046033225881	0.674646737349672	-4.28887130500683
PSME3	5152	10197	proteasome activator subunit 3	0.24565660778547	5.06594298626542	1.75006358052859	0.0881727900687431	0.675209527817836	-4.25492415818481
MRPS22	5382	56945	mitochondrial ribosomal protein S22	-0.163821215154122	4.39063920935279	-1.74915856475311	0.0883311375512502	0.675644329379179	-4.20973727660582
NCF4	1759	4689	neutrophil cytosolic factor 4	0.424192088855302	6.54045854321629	1.74912933765576	0.0883362552859561	0.675644329379179	-4.30713441064055
PDK4	4519	5166	pyruvate dehydrogenase kinase 4	-0.628168323048252	5.4652892467441	-1.74823390400073	0.0884931683453649	0.676436011021359	-4.26608336526063
KRT8P12	2047	90133	keratin 8 pseudogene 12	-0.27303328862258	2.92095521829266	-1.74749104563379	0.0886235217882518	0.676643576839923	-4.15553721107202
ATXN1	16487	6310	ataxin 1	0.244083854056455	7.50529417508718	1.74738806921976	0.0886416043174147	0.676643576839923	-4.3064291936294
C4BPA	2441	722	complement component 4 binding protein alpha	-1.923304582314	1.15069145752759	-1.74709928263066	0.0886923313726432	0.676643576839923	-4.21819513780852
NCOA6	11131	23054	nuclear receptor coactivator 6	0.203847195164198	5.83880676644146	1.74605334357326	0.0888762603139344	0.676643576839923	-4.28957400669909
BICD2	6427	23299	BICD cargo adaptor 2	0.212052763714871	6.94633970588693	1.74567730946391	0.0889424641558523	0.676643576839923	-4.31348005184346
BTN3A3	5658	10384	butyrophilin subfamily 3 member A3	-0.240858599157012	6.70645324414143	-1.74528506979693	0.0890115651311244	0.676643576839923	-4.30940293931946
ZNF738	3905	148203	zinc finger protein 738	-0.301296841355824	2.71157912469816	-1.7452313120454	0.0890210391526883	0.676643576839923	-4.15515714255767
SLC35A2	3745	7355	solute carrier family 35 member A2	0.293992894284348	2.5933148597279	1.74511399762898	0.0890417170445734	0.676643576839923	-4.1568114669467
NDUFA5P11	343	102724866	NADH:ubiquinone oxidoreductase subunit A5 pseudogene 11	-0.34601808577138	2.41594897595981	-1.74487104154051	0.0890845533875511	0.676643576839923	-4.15867934362451
BCLAF1P1	2752	728366	BCL2 associated transcription factor 1 pseudogene 1	-0.229220264952072	3.14837702320835	-1.74470783817583	0.0891133379703849	0.676643576839923	-4.16022000285293
PTPRC	8371	5788	protein tyrosine phosphatase receptor type C	0.178361820123989	12.0325284076825	1.74461258904765	0.0891301408952395	0.676643576839923	-4.20613185280477
TAF1	10860	6872	TATA-box binding protein associated factor 1	0.111266158963605	6.9128470014733	1.74371922716695	0.0892878683062257	0.676643576839923	-4.31319419945332
FRMPD3	9158	84443	FERM and PDZ domain containing 3	0.754762768637392	0.770571962405844	1.74352302654535	0.0893225397719379	0.676643576839923	-4.23350174583049
PPP3R1	3363	5534	protein phosphatase 3 regulatory subunit B, alpha	0.304231809372479	7.33314248530883	1.74328380218556	0.0893648294021756	0.676643576839923	-4.31419342195841
LINC01503	1594	100506119	long intergenic non-protein coding RNA 1503	0.627283418443102	0.565586187717995	1.74292386968157	0.0894284891777783	0.676643576839923	-4.23313842074426
GATB	11757	5188	glutamyl-tRNA amidotransferase subunit B	-0.262064958335175	3.13078704200472	-1.74273003640361	0.0894627873961846	0.676643576839923	-4.16422243358994
TMEM69	2439	51249	transmembrane protein 69	-0.178279735842567	4.099460444906	-1.74218346587163	0.0895595607347173	0.676643576839923	-4.20552752119813
ERI1	6385	90459	exoribonuclease 1	0.273911959519507	4.99822079835381	1.74144723138287	0.0896900536438662	0.676643576839923	-4.25819527900424
FLYWCH1	8419	84256	FLYWCH-type zinc finger 1	-0.400602313496473	3.12777254792701	-1.74060010818482	0.0898403977603585	0.676643576839923	-4.17223456679854
NBR2	2096	10230	neighbor of BRCA1 lncRNA 2	-0.534272684015512	1.2734338709081	-1.73977114852483	0.0899877224201557	0.676643576839923	-4.20340529869845
ZBTB14	4120	7541	zinc finger and BTB domain containing 14	-0.217552484571957	5.00081243387247	-1.73966416736865	0.0900067500841698	0.676643576839923	-4.25452754939207
SLC35E1	7257	79939	solute carrier family 35 member E1	0.178399537942614	4.69231251274536	1.73959377173421	0.0900192724853618	0.676643576839923	-4.24840066590375
XPA	1833	7507	XPA, DNA damage recognition and repair factor	-0.266473431749727	4.09093983474892	-1.73951223339689	0.0900337788402472	0.676643576839923	-4.20407262123186
TRIAP1	1442	51499	TP53 regulated inhibitor of apoptosis 1	-0.409398428714541	2.61855493028815	-1.73930571359437	0.0900705291992932	0.676643576839923	-4.16147167412742
ABHD16A	4153	7920	abhydrolase domain containing 16A	0.274745747832348	3.10303926978068	1.73927775484278	0.0900755054454111	0.676643576839923	-4.17840092448502
CASP2	8020	835	caspase 2	0.158246187153255	5.39111631066848	1.73915713877181	0.0900969759672179	0.676643576839923	-4.28509685792545
ZNF217	6181	7764	zinc finger protein 217	0.160566422653053	8.75946391527136	1.73831892810182	0.0902463017660942	0.676643576839923	-4.29720775482986
ZNF286B	5884	729288	zinc finger protein 286B (pseudogene)	-0.411429342612437	1.60012154634909	-1.73795661174513	0.0903109118722091	0.676643576839923	-4.19489211697152
MCTP2	12978	55784	multiple C2 and transmembrane domain containing 2	0.416781893211427	9.01236152632595	1.73775636944239	0.0903466367047114	0.676643576839923	-4.28814989224429
RECK	6045	8434	reversion inducing cysteine rich protein with kazal motifs	-0.26389808001875	3.3920091558764	-1.73760614770587	0.09037344522779	0.676643576839923	-4.17810619356958
SLC26A6	6373	65010	solute carrier family 26 member 6	0.541209897742955	3.44118461206282	1.73756777967145	0.0903802934417346	0.676643576839923	-4.19064226276379
ETV7	2374	51513	ETS variant transcription factor 7	-1.02433463044281	2.38567106932275	-1.73690730901305	0.090498247259148	0.676643576839923	-4.16434333363816
SMDT1	1731	91689	single-pass membrane protein with aspartate rich tail 1	-0.295192624891922	2.48541120722105	-1.73688001349958	0.090503124749287	0.676643576839923	-4.16407688433851
PPP1R14BP3	445	100507617	protein phosphatase 1 regulatory inhibitor subunit 14B pseudogene 3	0.364529715507996	2.65367268557024	1.7365480263825	0.0905624657970424	0.676643576839923	-4.16588929772482
CYB5B	6903	80777	cytochrome b5 type B	-0.190912247053631	5.0922475096032	-1.73620002590695	0.0906247040852111	0.676643576839923	-4.26640553524764
CES1	2937	1066	carboxylesterase 1	-0.970968030701298	2.34263491285063	-1.73611157878068	0.0906405281480736	0.676643576839923	-4.16836532281421
ABCB10	4256	23456	ATP binding cassette subfamily B member 10	0.385377694259554	6.36440831381896	1.73547394047493	0.0907546763209173	0.676643576839923	-4.3214113749843
NCBP1	5548	4686	nuclear cap binding protein subunit 1	-0.174462625463555	5.96283167372319	-1.73510787456931	0.090820262685204	0.676643576839923	-4.30659459087145
SLC2A5	6693	6518	solute carrier family 2 member 5	-0.589243190904852	1.4295895249582	-1.73497880717938	0.0908433965513176	0.676643576839923	-4.18724280598472
ACER2	2238	340485	alkaline ceramidase 2	0.408042156689719	2.00952252266176	1.73428400105279	0.0909680173450337	0.676643576839923	-4.17531109897514
TXNRD1	6708	7296	thioredoxin reductase 1	0.243128619051921	7.43462026446215	1.73368343310392	0.0910758506684764	0.676643576839923	-4.32636765515372
PPP4R1	8131	9989	protein phosphatase 4 regulatory subunit 1	0.313701653561218	8.33133246560439	1.73342183388264	0.0911228547965034	0.676643576839923	-4.31197412835244
BCL3	3242	602	BCL3 transcription coactivator	0.477694592673928	3.24464275732756	1.73337838180776	0.091130664225624	0.676643576839923	-4.1922429616729
ANAPC7	6009	51434	anaphase promoting complex subunit 7	-0.143354250376489	4.97529448788266	-1.73328056274299	0.0911482468157023	0.676643576839923	-4.26795660375737
TMEM63B	4425	55362	transmembrane protein 63B	0.599548679546597	5.72154773903214	1.73308937626157	0.0911826200174529	0.676643576839923	-4.31237444111615
ACCS	5826	84680	1-aminocyclopropane-1-carboxylate synthase homolog (inactive)	-0.489378976995054	3.28593774395932	-1.73295462421943	0.0912068534444762	0.676643576839923	-4.17849062168857
BZW1	8085	9689	basic leucine zipper and W2 domains 1	-0.11461150133834	6.1720163058251	-1.73294430126935	0.0912087101166755	0.676643576839923	-4.31852098136256
HERC5	4766	51191	HECT and RLD domain containing E3 ubiquitin protein ligase 5	-0.906684763233048	5.97682028377202	-1.73276638721864	0.0912407144681506	0.676643576839923	-4.31712745863623
SERINC3	4683	10955	serine incorporator 3	0.18873765007416	7.7196120032719	1.73259517288622	0.0912715224928928	0.676643576839923	-4.32490935115012
MCU	4533	90550	mitochondrial calcium uniporter	0.16949628495401	4.95389283095538	1.73259429418751	0.0912716806269142	0.676643576839923	-4.26771447980064
SMC5	6637	23137	structural maintenance of chromosomes 5	-0.129487241720017	6.81010881702394	-1.73250409477455	0.0912879144807169	0.676643576839923	-4.3261378499841
TRIM56	11173	81844	tripartite motif containing 56	-0.191191591175482	7.0422240580171	-1.73238483413982	0.0913093824019182	0.676643576839923	-4.33211788326238
AGL	8434	178	amylo-alpha-1, 6-glucosidase, 4-alpha-glucanotransferase	-0.293392477133504	3.61314010626929	-1.73214986677987	0.0913516908571189	0.676643576839923	-4.19527591783063
MPST	6760	4357	mercaptopyruvate sulfurtransferase	0.398745892414031	3.14059650315445	1.73179233113715	0.0914161005113171	0.676724914714402	-4.19361739549135
MED13L	17290	23389	mediator complex subunit 13L	0.160142204273171	9.16669401289328	1.73086138352856	0.0915839877895163	0.677177393640649	-4.2960594422155
RARA	4731	5914	retinoic acid receptor alpha	0.355018619104325	5.35146422865909	1.73086047101011	0.0915841524795856	0.677177393640649	-4.30955186661851
EXO5	3092	64789	exonuclease 5	-0.230166577979329	2.8909676434753	-1.72984510954331	0.0917675569054821	0.678048109416448	-4.17679587696569
IGHA1	1112	3493	immunoglobulin heavy constant alpha 1	0.924482265279782	5.33080861732311	1.72961603263812	0.0918089773921687	0.678048109416448	-4.30851950775122
DOLPP1	2249	57171	dolichyldiphosphatase 1	-0.316250178340765	2.28838973470652	-1.72854557010459	0.092002739895904	0.679001067609658	-4.17361909280832
WDR36	7656	134430	WD repeat domain 36	-0.236857926810833	5.93404931000232	-1.7283111024035	0.0920452260449852	0.679001067609658	-4.31407957395526
GRB14	2958	2888	growth factor receptor bound protein 14	-0.730038575268421	1.14784547824979	-1.72744225101217	0.0922028070446054	0.679492959286895	-4.23314430362927
WDR41	7230	55255	WD repeat domain 41	-0.152170553531839	5.24325430964311	-1.72713697283486	0.0922582279017129	0.679492959286895	-4.28860736248768
TRBV20-1	413	28567	T cell receptor beta variable 20-1	-0.640697303213696	1.72344134710518	-1.72626279181917	0.0924170825042503	0.679492959286895	-4.19123694258876
DUS3L	3642	56931	dihydrouridine synthase 3 like	-0.418507092478826	2.88971860448663	-1.72588150366688	0.0924864409964524	0.679492959286895	-4.18156140978503
REM2	2305	161253	RRAD and GEM like GTPase 2	0.432395218906044	2.38888456054896	1.72578953475337	0.0925031771709341	0.679492959286895	-4.1762173417516
RPS18P9	460	645958	ribosomal protein S18 pseudogene 9	-0.330574135053176	1.55321274953852	-1.72575215561221	0.0925099800161945	0.679492959286895	-4.19726129136958
STAMBPL1	6323	57559	STAM binding protein like 1	-0.297507325973855	4.51677657200914	-1.72574223470989	0.0925117856485049	0.679492959286895	-4.25026914000061
LYRM9	5380	201229	LYR motif containing 9	-0.401982086039613	2.17340797493337	-1.72558128643001	0.0925410828019812	0.679492959286895	-4.1804436237399
TBP	2318	6908	TATA-box binding protein	-0.246861019130054	3.37631836037248	-1.72498024337396	0.0926505581715074	0.679902647624747	-4.19346504249998
LILRA5	1760	353514	leukocyte immunoglobulin like receptor A5	0.535637600652767	6.78032476157155	1.72444637423308	0.0927478889693077	0.680222791942821	-4.34015651958378
BPI	5626	671	bactericidal permeability increasing protein	-0.792711386317334	1.92065387460242	-1.72327056532059	0.0929625541415837	0.680241174322219	-4.18267512082643
STAG3L2	2694	442582	stromal antigen 3-like 2 (pseudogene)	-0.443091210407637	1.62027795028107	-1.72320122021936	0.0929752272805975	0.680241174322219	-4.19692823881285
GOLGA6L9	6576	440295	golgin A6 family like 9	-0.690241084677652	0.948111492793093	-1.72228452463884	0.0931428931954079	0.680241174322219	-4.24689586784737
TAGLN2	2487	8407	transgelin 2	0.255359101547787	8.12896972694987	1.72185730958742	0.093221118038241	0.680241174322219	-4.33198301761542
MRPL11	2539	65003	mitochondrial ribosomal protein L11	-0.296578190992922	3.11987743653658	-1.72181251421748	0.0932293234297598	0.680241174322219	-4.19146960777695
ARHGAP11A	6428	9824	Rho GTPase activating protein 11A	0.458565862554175	3.30917745023144	1.7215003101724	0.0932865281394448	0.680241174322219	-4.19807795066825
NFE2	2469	4778	nuclear factor, erythroid 2	0.371563972226905	8.14142133360043	1.72127509781503	0.093327811662386	0.680241174322219	-4.33218372851651
UTP23	5252	84294	UTP23 small subunit processome component	-0.230953979305337	5.01812292617634	-1.72099948928628	0.0933783540106233	0.680241174322219	-4.28417906848884
ESPN	6943	83715	espin	1.28008288977937	0.900919695401143	1.72089410358293	0.0933976861549684	0.680241174322219	-4.2061107839195
SWI5	1649	375757	SWI5 homologous recombination repair protein	-0.313288023863284	1.81410958175829	-1.72085711246429	0.0934044726643604	0.680241174322219	-4.19461121468754
IGLV1-47	407	28822	immunoglobulin lambda variable 1-47	0.730733870188602	0.312624375086982	1.72068114774095	0.0934367613502255	0.680241174322219	-4.24265575642666
C21orf91	6235	54149	chromosome 21 open reading frame 91	-0.171575446217473	6.56560274526436	-1.72015060469748	0.0935341698228771	0.680241174322219	-4.34346832819418
PRDM2	10923	7799	PR/SET domain 2	0.150395480614356	6.67465292693399	1.7201384260401	0.0935364068361316	0.680241174322219	-4.34656247445583
SERPINI1	2418	5274	serpin family I member 1	-0.329076255413225	2.17786330781467	-1.71950868609782	0.093652140231141	0.680241174322219	-4.18606686452906
CSTF1	4800	1477	cleavage stimulation factor subunit 1	-0.154915983496797	4.85544329465641	-1.71939533856534	0.0936729838796205	0.680241174322219	-4.27593803499123
UFL1	4539	23376	UFM1 specific ligase 1	-0.215205239666773	5.95378213005673	-1.7185878022918	0.0938215949337772	0.680241174322219	-4.32661111895684
IGKC	523	3514	immunoglobulin kappa constant	0.657919333431134	7.6722599042519	1.71858165191184	0.0938227275433058	0.680241174322219	-4.33760405263159
CDKN2D	1503	1032	cyclin dependent kinase inhibitor 2D	0.319426396618192	6.29134859376651	1.7185772837738	0.0938235319549662	0.680241174322219	-4.34849225891546
LRRC37A17P	5074	644397	leucine rich repeat containing 37 member A17, pseudogene	-0.520124244533815	2.85489208088298	-1.71851476635645	0.0938350454400495	0.680241174322219	-4.18576904874704
CYP4F10P	752	646575	cytochrome P450 family 4 subfamily F member 10, pseudogene	0.666547558425278	0.745503914118701	1.71849339410149	0.0938389817195965	0.680241174322219	-4.2537795394564
ZNHIT6	6197	54680	zinc finger HIT-type containing 6	-0.28008479219351	4.46895456534194	-1.71788992422778	0.0939501838825889	0.680241174322219	-4.25191099283034
ZDHHC21	9426	340481	zinc finger DHHC-type containing 21	-0.23971722638704	5.44050062716395	-1.71775411761868	0.0939752242787765	0.680241174322219	-4.31108557052399
SETD5	10808	55209	SET domain containing 5	0.155070590668609	6.81938121321621	1.71746517914286	0.0940285180628556	0.680241174322219	-4.350654799694
OAS1	4947	4938	2'-5'-oligoadenylate synthetase 1	-0.739732735021271	5.94943460494944	-1.71740651666406	0.0940393412472924	0.680241174322219	-4.33620352897964
PAM16	2383	51025	presequence translocase associated motor 16	0.481172491463234	1.49873251536943	1.71690446852266	0.0941320112484068	0.680446269531051	-4.1949303757367
PPP3CA	5213	5530	protein phosphatase 3 catalytic subunit alpha	0.165157282446488	6.92841730517585	1.71594189599524	0.0943098995328102	0.680446269531051	-4.35400435067315
GATA1	1500	2623	GATA binding protein 1	0.599696057970731	4.26874853040105	1.71577716411807	0.0943403708799582	0.680446269531051	-4.26981502015927
GHRLOS	1714	100126793	ghrelin opposite strand/antisense RNA	0.563187467876128	2.44814744734526	1.7155374225486	0.094384731836197	0.680446269531051	-4.18746370775397
MTCO2P33	465	107075197	MT-CO2 pseudogene 33	0.62574345080936	0.664537319055862	1.71536808729822	0.0944160755240627	0.680446269531051	-4.26166872871785
RN7SL166P	280	106479282	RNA, 7SL, cytoplasmic 166, pseudogene	0.539879239138479	1.24330573895907	1.71519697033172	0.0944477578161934	0.680446269531051	-4.20622784323967
EXOSC6	5153	118460	exosome component 6	-0.274641432509347	4.59331775462	-1.71519653485482	0.0944478384560055	0.680446269531051	-4.27150958796976
IGKV1-12	398	28940	immunoglobulin kappa variable 1-12	0.881351326614186	0.989509338128989	1.71438261899103	0.0945986563333904	0.680446269531051	-4.21316109441174
MIR4697HG	5164	283174	MIR4697 host gene	-0.696848242158616	1.79629161437278	-1.71424510486724	0.0946241573827385	0.680446269531051	-4.20493025963486
SETD9	2711	133383	SET domain containing 9	-0.575671779503953	1.52948075880995	-1.71409377709957	0.0946522266970078	0.680446269531051	-4.20947054422876
METTL17	4449	64745	methyltransferase like 17	-0.217111771540552	4.45597921243379	-1.71400584325488	0.0946685404575104	0.680446269531051	-4.26330314608692
UTRN	14604	7402	utrophin	-0.167757262375199	9.60398625328577	-1.71376970210725	0.0947123616913976	0.680446269531051	-4.30936257498995
PGM5	7426	5239	phosphoglucomutase 5	-1.05020723024628	1.70304019990882	-1.71284824295483	0.0948835205702074	0.680789057962884	-4.20572328546401
PADI2	5984	11240	peptidyl arginine deiminase 2	0.48797067646983	6.84665190132436	1.71261461920126	0.094926956556844	0.680789057962884	-4.35764874768431
HDAC4	13368	9759	histone deacetylase 4	0.278157539007301	6.38612373846821	1.71201789608454	0.0950379761874093	0.680789057962884	-4.35985666306098
IL15	7860	3600	interleukin 15	-0.462074270314415	3.87552677609948	-1.71196538311527	0.0950477513384436	0.680789057962884	-4.23537239112294
RAD1	6766	5810	RAD1 checkpoint DNA exonuclease	-0.232567452893028	4.05646388233986	-1.71189095556849	0.0950616072649358	0.680789057962884	-4.24136964780645
IFIT3	2640	3437	interferon induced protein with tetratricopeptide repeats 3	-0.771460395740236	8.12816156886389	-1.71177836569623	0.0950825709408134	0.680789057962884	-4.34623324874196
NPM1P24	894	100422312	nucleophosmin 1 pseudogene 24	-0.438401309326761	1.83397418333126	-1.71064354403493	0.0952940841700593	0.680973832473688	-4.20414025367435
RAB35	4022	11021	RAB35, member RAS oncogene family	0.206627861290489	4.75562797015394	1.7106360819832	0.0952954762768306	0.680973832473688	-4.29727649997886
CDA	963	978	cytidine deaminase	0.587579868690681	3.73647749162049	1.7101115588773	0.095393372791171	0.680973832473688	-4.23529731322193
KIAA0319	7172	9856	KIAA0319	0.492777965179251	3.67072849321512	1.70988301559119	0.0954360540855834	0.680973832473688	-4.23473037275621
RYK	8047	6259	receptor like tyrosine kinase	-0.142611934324336	5.32185497033623	-1.70979637394359	0.0954522388859606	0.680973832473688	-4.31491532624431
RAD23BP1	1227	131185	RAD23B pseudogene 1	0.305972493874321	2.07718772329572	1.70969856796452	0.0954705119474092	0.680973832473688	-4.19621063438083
HNRNPH2	2223	3188	heterogeneous nuclear ribonucleoprotein H2	0.215649300419776	7.43253341436473	1.70962250398815	0.0954847249702566	0.680973832473688	-4.35818521214208
MFSD4B	5958	91749	major facilitator superfamily domain containing 4B	-0.26571520649853	4.75506846255735	-1.70927346970797	0.0955499667672407	0.681055643823225	-4.28708921948485
FCAR	2366	2204	Fc fragment of IgA receptor	0.541900366126497	5.31952271661232	1.70878217662236	0.0956418625847927	0.681327239313265	-4.32761166262143
CD302	4075	9936	CD302 molecule	0.249630706267801	7.42064799065881	1.70805139078053	0.0957786913526521	0.681660279455648	-4.3617168741139
IL11RA	4271	3590	interleukin 11 receptor subunit alpha	-0.434802936712293	3.51345204875236	-1.70795767723379	0.095796249599799	0.681660279455648	-4.22566067682306
ZNF829	7742	374899	zinc finger protein 829	-0.407126203436441	2.87739697130333	-1.70725311733661	0.0959283423244345	0.681890074767	-4.19725165145534
AKAP9	18210	10142	A-kinase anchoring protein 9	-0.132736461015659	8.70490937777267	-1.7071169123282	0.0959538958706405	0.681890074767	-4.34377935892975
GTPBP3	4532	84705	GTP binding protein 3, mitochondrial	-0.543896000409353	0.469265015837125	-1.70664523839624	0.0960424308267123	0.681890074767	-4.28191448434937
L3MBTL3	5113	84456	L3MBTL histone methyl-lysine binding protein 3	-0.16533499944745	5.30195168420365	-1.70663747491391	0.0960438886297433	0.681890074767	-4.31559129467131
PPT1	3306	5538	palmitoyl-protein thioesterase 1	0.294315341948002	7.95635957337285	1.7063264229737	0.0961023121638757	0.681922625135938	-4.35753396876996
INTS6P1	2530	285634	integrator complex subunit 6 pseudogene 1	0.217499682144681	3.44794338800114	1.70557991854926	0.0962426454986288	0.682491130414237	-4.22277874392878
WDR46	3131	9277	WD repeat domain 46	-0.188794708157382	4.30913786858083	-1.70527536687924	0.096299946283317	0.682491130414237	-4.27056814197425
DEFA4	617	1669	defensin alpha 4	-1.36527013247195	1.10239390018861	-1.70504089045125	0.0963440818869932	0.682491130414237	-4.22724495594564
RN7SL564P	250	106479428	RNA, 7SL, cytoplasmic 564, pseudogene	0.575862306720509	0.87467506703441	1.70466841113075	0.0964142284344112	0.682523101357167	-4.20838000015784
CMTR1	5274	23070	cap methyltransferase 1	-0.271506884283774	6.04229264392665	-1.70444476009033	0.0964563675532394	0.682523101357167	-4.35736635825396
MAP1LC3B2	1767	643246	microtubule associated protein 1 light chain 3 beta 2	0.371730864806041	3.21082694893013	1.70390163076208	0.0965587648208973	0.682866172652979	-4.22239236802471
EIF4EBP2	7257	1979	eukaryotic translation initiation factor 4E binding protein 2	0.194808515665499	7.40482091125386	1.70342670202691	0.0966483781735639	0.682886852313743	-4.36926049608259
TTC21B	7538	79809	tetratricopeptide repeat domain 21B	-0.173592444087033	5.67829611589481	-1.70305474908082	0.0967186095185661	0.682886852313743	-4.34271336746866
HEATR3	4183	55027	HEAT repeat containing 3	-0.199100557204167	4.77426780952928	-1.70275013199143	0.0967761582606596	0.682886852313743	-4.2949849646134
PGLYRP1	720	8993	peptidoglycan recognition protein 1	0.895855835447625	0.725523686584409	1.70256651424871	0.0968108613678895	0.682886852313743	-4.23576074053689
GALNT11	8295	63917	polypeptide N-acetylgalactosaminyltransferase 11	-0.212902989167466	4.84711158539753	-1.70218889273479	0.0968822630288129	0.682886852313743	-4.30151102800772
PET100	2220	100131801	PET100 cytochrome c oxidase chaperone	-0.486862603330575	1.71350646165065	-1.70217347748048	0.0968851787152847	0.682886852313743	-4.2150139822661
OR7E100P	1015	81430	olfactory receptor family 7 subfamily E member 100 pseudogene	0.467468027143365	0.917672013870556	1.70119839772213	0.097069756485142	0.683807305695667	-4.25106278025367
FANCD2	8378	2177	FA complementation group D2	-0.208633112990262	4.52484575699717	-1.70058969012775	0.0971851299590312	0.684239497532567	-4.28607198671453
TUBGCP5	6478	114791	tubulin gamma complex associated protein 5	-0.175080709642704	4.36415839471598	-1.69993624891509	0.09730910900946	0.684406168760376	-4.2728914277205
ZNF530	5019	348327	zinc finger protein 530	-0.36912033258616	2.45461444104423	-1.69971253194317	0.0973515855909969	0.684406168760376	-4.20323587873976
AOAH-IT1	573	100874264	AOAH intronic transcript 1	0.457553839242284	3.3959622190658	1.699610792849	0.0973709076351017	0.684406168760376	-4.22698397477313
NACC1	4474	112939	nucleus accumbens associated 1	0.372196506327381	2.33348652800232	1.69899342701907	0.0974882246310343	0.684639428142414	-4.20634791154166
SLC8A1	21922	6546	solute carrier family 8 member A1	0.395946258129193	7.46825948180639	1.69886733434845	0.0975122002501906	0.684639428142414	-4.37499979591261
STX17	4740	55014	syntaxin 17	-0.142700381286373	5.27326722340633	-1.69840203671232	0.0976007156716453	0.684881254679811	-4.33430526270189
MORN3	3856	283385	MORN repeat containing 3	-0.511040748574827	1.61580478030771	-1.69712751060527	0.0978435158000323	0.685879018918455	-4.22165606840534
TAF7	2723	6879	TATA-box binding protein associated factor 7	0.134066097733233	6.43894360526498	1.69708718056986	0.097851206946601	0.685879018918455	-4.37431288854077
GMPR2	3640	51292	guanosine monophosphate reductase 2	0.200088214986378	6.40794217300228	1.69648513004457	0.0979660808210274	0.686304413539343	-4.37633643016244
ZER1	4370	10444	zyg-11 related cell cycle regulator	0.45621830747739	6.51854321063652	1.69568447238345	0.0981190233284535	0.686693047981565	-4.38406281768255
RRP8	6922	23378	ribosomal RNA processing 8	-0.218669271109881	4.38904920410401	-1.69557947517216	0.0981390947115368	0.686693047981565	-4.28463492672573
RILP	2103	83547	Rab interacting lysosomal protein	0.507925580570312	4.64964100134286	1.69534357241328	0.0981842025812896	0.686693047981565	-4.31912866277909
EXOSC2	4240	23404	exosome component 2	-0.255210382187033	4.37464592620444	-1.6947154249419	0.0983043970343746	0.686728341199644	-4.27942390402325
GPR171	1795	29909	G protein-coupled receptor 171	-0.379671433992543	4.63566422350619	-1.69452320733173	0.0983412018008512	0.686728341199644	-4.2982430452756
NSUN2	5506	54888	NOP2/Sun RNA methyltransferase 2	-0.156730327150937	6.20519741786085	-1.69446732704935	0.0983519035951488	0.686728341199644	-4.37152569948341
C1orf115	3413	79762	chromosome 1 open reading frame 115	-0.413352865155757	1.23505108860125	-1.69381146978943	0.0984775810086155	0.686743615156547	-4.2478250725875
RNF123	7458	63891	ring finger protein 123	0.416296313407503	5.83190320865625	1.69375046346602	0.0984892780056472	0.686743615156547	-4.37625724864887
PI4K2B	3540	55300	phosphatidylinositol 4-kinase type 2 beta	-0.252952966099606	3.96134349880034	-1.6930776194169	0.0986183617366375	0.686743615156547	-4.26197895946032
RPSAP6	882	414254	ribosomal protein SA pseudogene 6	-0.605193020389344	0.78387687609357	-1.69239780868508	0.0987489246141328	0.686743615156547	-4.27625098030937
GAS5	3631	60674	growth arrest specific 5	-0.245967229149801	5.40308492669788	-1.69237663050897	0.0987529943490949	0.686743615156547	-4.34154844201196
RXRA	10814	6256	retinoid X receptor alpha	0.309288999580674	7.2640316925684	1.69209307065552	0.0988074984523578	0.686743615156547	-4.38727586893622
NIT2	9264	56954	nitrilase family member 2	-0.271044785503547	3.97029956498858	-1.69189664587415	0.0988452686329523	0.686743615156547	-4.26375275271119
NUDCD2	8847	134492	NudC domain containing 2	-0.289974681571883	3.55104777676088	-1.69123067184362	0.098973416823612	0.686743615156547	-4.24083499754916
ZNF419	8008	79744	zinc finger protein 419	-0.290928095605714	3.32925917063914	-1.6912242641863	0.0989746504684998	0.686743615156547	-4.2325688260422
YIPF1	2075	54432	Yip1 domain family member 1	0.248722925390974	5.28391432488987	1.69109966684385	0.0989986413158174	0.686743615156547	-4.34448272620573
LRRIQ3	8759	127255	leucine rich repeats and IQ motif containing 3	-0.665994097655449	0.718541958698716	-1.69103244868696	0.099011585975639	0.686743615156547	-4.28701180080376
SLC12A9	8894	56996	solute carrier family 12 member 9	0.302461937511456	6.56766532075721	1.69095212642268	0.0990270560249483	0.686743615156547	-4.39044226170709
GCFC2	5465	6936	GC-rich sequence DNA-binding factor 2	-0.196572726551102	4.65800689902011	-1.69078659318176	0.0990589440147649	0.686743615156547	-4.30379526553435
PGK1P2	1214	5233	phosphoglycerate kinase 1, pseudogene 2	0.288769453185239	3.2537123006712	1.68965144630648	0.0992778460516266	0.687118270190131	-4.23601287833397
ALDH9A1	3308	223	aldehyde dehydrogenase 9 family member A1	0.173617880669333	5.6284660239629	1.6896319293815	0.0992816132074319	0.687118270190131	-4.36321187169549
S100A12	518	6283	S100 calcium binding protein A12	0.766996560474614	7.48693562192244	1.68946777145386	0.0993133036557337	0.687118270190131	-4.38330845619384
PLEKHM3	11671	389072	pleckstrin homology domain containing M3	0.151882175640646	5.73050314744423	1.68902851032195	0.099398143649569	0.687118270190131	-4.36819513320765
FBXW4P1	2239	26226	F-box and WD repeat domain containing 4 pseudogene 1	0.49874175403751	0.962622132386534	1.68894855177735	0.0994135935091786	0.687118270190131	-4.24643147210665
E2F3-IT1	400	100874268	E2F3 intronic transcript 1	0.411199120162611	2.56837590523993	1.68843020938719	0.0995137976952361	0.687118270190131	-4.21569508472577
TP53INP2	4228	58476	tumor protein p53 inducible nuclear protein 2	0.691267541046366	1.29035384320023	1.68838806015087	0.0995219495239413	0.687118270190131	-4.2330833427471
COX20	4864	116228	cytochrome c oxidase assembly factor COX20	-0.197751834025163	4.6921836661034	-1.68785817464285	0.0996244787322253	0.687118270190131	-4.31210732936824
ANKUB1	6539	389161	ankyrin repeat and ubiquitin domain containing 1	-1.11244668197402	0.954718564859285	-1.68749454203522	0.099694889820863	0.687118270190131	-4.27506671903662
DENND1A	10256	57706	DENN domain containing 1A	0.236861590311285	5.77469154484349	1.68740721556008	0.0997118052082775	0.687118270190131	-4.37570092095888
FRMD3	6486	257019	FERM domain containing 3	0.438545735145082	4.05360772908611	1.68715404829024	0.0997608578837296	0.687118270190131	-4.27524633286764
LAIR1	8071	3903	leukocyte associated immunoglobulin like receptor 1	-0.249595676564071	5.58268299990559	-1.68643729328425	0.0998998419970487	0.687118270190131	-4.36288538358119
CACNB4	36268	785	calcium voltage-gated channel auxiliary subunit beta 4	-0.794782302319226	3.41406524362722	-1.68640402785727	0.0999062963068047	0.687118270190131	-4.2355556631762
PRDX1	1522	5052	peroxiredoxin 1	-0.293358697159001	5.35209674155332	-1.68523230695641	0.100133859604335	0.687118270190131	-4.35022589200224
DOCK4	11348	9732	dedicator of cytokinesis 4	0.387802981565355	6.30752512300243	1.68519720814857	0.100140682868252	0.687118270190131	-4.38892927390263
PPM1N	2571	147699	protein phosphatase, Mg2+/Mn2+ dependent 1N (putative)	0.514263388722821	1.13971833642937	1.68500539071108	0.100177979291721	0.687118270190131	-4.25008991422965
SNX1	9780	6642	sorting nexin 1	0.107059664732704	7.14574778602006	1.6842246448612	0.100329904073136	0.687118270190131	-4.39759067571047
TVP23CP1	639	100421599	TVP23C pseudogene 1	0.543400803338127	0.691066422865919	1.68356342029517	0.100458720598883	0.687118270190131	-4.28681884183304
SPCS2P4	681	653566	signal peptidase complex subunit 2 pseudogene 4	0.200671939042121	3.877477984625	1.682813437986	0.100604994340559	0.687118270190131	-4.2711795442546
IL27RA	2962	9466	interleukin 27 receptor subunit alpha	-0.27303330270155	5.24264119002903	-1.68268403301393	0.10063025084599	0.687118270190131	-4.3537715104876
SEMA3C	6268	10512	semaphorin 3C	-0.413601029201466	4.19564630319467	-1.68230474419162	0.100704308488007	0.687118270190131	-4.28596775523769
CNTNAP2	16666	26047	contactin associated protein like 2	-1.27017558018186	0.488731239853617	-1.68206860896045	0.100750437629784	0.687118270190131	-4.30500398274836
IMPDH1	3662	3614	inosine monophosphate dehydrogenase 1	0.373231148186049	5.17543154349837	1.68206434966278	0.100751269846537	0.687118270190131	-4.36666920777875
NFAM1	5817	150372	NFAT activating protein with ITAM motif 1	0.321309454948386	6.63705180528011	1.68199127748109	0.10076554817988	0.687118270190131	-4.40324089820118
ANAPC15	2883	25906	anaphase promoting complex subunit 15	0.351993316043667	2.4808324506711	1.68197946127395	0.100767857228912	0.687118270190131	-4.22180104871311
PDE6D	2850	5147	phosphodiesterase 6D	-0.174999056643586	3.70582399733998	-1.68197440573919	0.100768845163173	0.687118270190131	-4.25765545424836
CHRNA10	2703	57053	cholinergic receptor nicotinic alpha 10 subunit	0.358836733193286	1.79391110284838	1.68197237644938	0.100769241721881	0.687118270190131	-4.22669346060727
ABRACL	1200	58527	ABRA C-terminal like	-0.254342194303406	4.60166575758272	-1.68187200744953	0.100788857192817	0.687118270190131	-4.30863525067604
PIAS2	17527	9063	protein inhibitor of activated STAT 2	-0.277455155797506	6.18946568892796	-1.68179919652331	0.100803088871029	0.687118270190131	-4.38832361371302
SNRPF	3043	6636	small nuclear ribonucleoprotein polypeptide F	-0.29918291923403	3.24384151594768	-1.68159767966172	0.100842486188387	0.687118270190131	-4.23493189251166
NOP14-AS1	7195	317648	NOP14 antisense RNA 1	-0.280616027288897	3.03454769013325	-1.68102898513973	0.100953736943054	0.687118270190131	-4.23451972952652
CALCRL	6144	10203	calcitonin receptor like receptor	-0.472341505011526	2.15918512875387	-1.68094940367964	0.100969313156613	0.687118270190131	-4.22470832578491
MTCO2P11	680	107075214	MT-CO2 pseudogene 11	0.457268413975724	1.21545619811677	1.68061621013016	0.101034549635135	0.687118270190131	-4.25251396598296
NOL3	2992	8996	nucleolar protein 3	0.727143833639776	0.536811655848671	1.68053680030657	0.101050102557666	0.687118270190131	-4.28858358445292
RAB1B	2007	81876	RAB1B, member RAS oncogene family	0.248108312933224	4.72165077090678	1.6803524769376	0.101086211113743	0.687118270190131	-4.32593811250845
GATAD2A	7296	54815	GATA zinc finger domain containing 2A	0.230566977151259	5.64823047492686	1.68031273577954	0.101093997722419	0.687118270190131	-4.38701131267941
ZNF514	6813	84874	zinc finger protein 514	-0.286561744046904	4.62633834237247	-1.68010146198928	0.101135401594218	0.687118270190131	-4.31334257063091
EEF1E1	2107	9521	eukaryotic translation elongation factor 1 epsilon 1	-0.332498716227882	1.71128805595605	-1.67984410225878	0.101185856019942	0.687118270190131	-4.23317567021393
GORAB	3773	92344	golgin, RAB6 interacting	-0.258888978569215	3.43649012731063	-1.6796256544538	0.101228698261076	0.687118270190131	-4.24693338548214
UBA6	11432	55236	ubiquitin like modifier activating enzyme 6	-0.109801615508822	6.80883912341122	-1.67874117844155	0.10140231631247	0.687687843241475	-4.40351390443024
ARHGEF6	6434	9459	Rac/Cdc42 guanine nucleotide exchange factor 6	-0.146887709210877	7.9121630340422	-1.67864506468767	0.10142119778739	0.687687843241475	-4.39859177155829
SAMD8	7316	142891	sterile alpha motif domain containing 8	0.16967784684532	6.7490993453076	1.67724318425923	0.101696927178383	0.68918848562943	-4.40601549705516
TGFBR1	6844	7046	transforming growth factor beta receptor 1	0.213457216836274	7.79236140794432	1.67644426591752	0.101854340131025	0.689886134812602	-4.40192983428055
MAOA	5528	4128	monoamine oxidase A	-0.89049628207311	1.8918076317202	-1.67594303248344	0.101953202367345	0.690042176481385	-4.22817290982728
PTGS1	5790	5742	prostaglandin-endoperoxide synthase 1	0.349134618129129	6.42704878037706	1.6757751252895	0.10198633778408	0.690042176481385	-4.40376969577906
MAPK1IP1L	6988	93487	mitogen-activated protein kinase 1 interacting protein 1 like	0.229247239026798	5.55073315417548	1.67488358375473	0.102162427160857	0.690191688880375	-4.37735367632072
SUGP2	8468	10147	SURP and G-patch domain containing 2	-0.187136794734833	6.26966634861367	-1.67484694741274	0.102169668624291	0.690191688880375	-4.40420241864783
CNPY4	2475	245812	canopy FGF signaling regulator 4	-0.235890257385906	3.18900853525985	-1.67421666068378	0.102294316311707	0.690191688880375	-4.24567970062281
TMEM19	6488	55266	transmembrane protein 19	-0.248925630031117	4.5740200367604	-1.67392549523909	0.102351940669999	0.690191688880375	-4.32365343645934
THADA	14220	63892	THADA armadillo repeat containing	-0.151044995778411	6.3853428216767	-1.67369005459245	0.102398556205752	0.690191688880375	-4.40574084513696
KRT73	2652	319101	keratin 73	-1.26589343938768	0.755136546581317	-1.67303900596958	0.10252755053779	0.690191688880375	-4.29645322462594
MRPS25	5383	64432	mitochondrial ribosomal protein S25	-0.264280053811597	5.08734655103301	-1.67300250127051	0.102534787307632	0.690191688880375	-4.35316562338824
CARD8	12927	22900	caspase recruitment domain family member 8	0.160911131878451	7.96000037931661	1.6722112887119	0.102691742830585	0.690191688880375	-4.40551307534234
STAG3L5P	2804	101735302	stromal antigen 3-like 5 pseudogene	-0.373807556527782	3.04819829400903	-1.6720640415839	0.102720974663499	0.690191688880375	-4.24599164892012
MRPL20	2788	55052	mitochondrial ribosomal protein L20	-0.198707590281669	4.24400241061129	-1.67196761884487	0.102740120452133	0.690191688880375	-4.30688583010784
G6PD	3709	2539	glucose-6-phosphate dehydrogenase	0.357362561090576	5.23300986924562	1.6719324128698	0.102747111718693	0.690191688880375	-4.37974608176047
MRPS18B	1888	28973	mitochondrial ribosomal protein S18B	-0.322504630211244	4.30679255359642	-1.67189955850686	0.102753636352731	0.690191688880375	-4.30635043277884
METTL5	2865	29081	methyltransferase like 5	-0.215169976939688	3.26455100844927	-1.67187342198527	0.102758827117762	0.690191688880375	-4.25105153508494
CNEP1R1	4178	255919	CTD nuclear envelope phosphatase 1 regulatory subunit 1	0.276812106360973	5.72062194709832	1.6713558520086	0.102861662214969	0.690191688880375	-4.39437114039462
ZNF442	6569	79973	zinc finger protein 442	-0.619649495472309	0.466561885357968	-1.67112800751227	0.102906959219284	0.690191688880375	-4.30743903743339
WDTC1	6024	23038	WD and tetratricopeptide repeats 1	0.299560224537843	6.32343259010707	1.67112214745095	0.102908124456061	0.690191688880375	-4.41307902393956
URB2	6001	9816	URB2 ribosome biogenesis homolog	-0.288043764979006	3.81912882539709	-1.67098803955408	0.102934793959816	0.690191688880375	-4.28129267856557
ACOT9	5046	23597	acyl-CoA thioesterase 9	-0.21758942312777	5.56296551156137	-1.66898409572761	0.10333399145325	0.692388061542308	-4.38807029973334
RIOK1	3237	83732	RIO kinase 1	-0.177734332178892	4.44466100559918	-1.66854597188188	0.103421438577323	0.692388061542308	-4.31726452985203
TP53RK	3520	112858	TP53 regulating kinase	-0.246999830253824	4.65417163985349	-1.66852134891999	0.103426355000635	0.692388061542308	-4.33312598666718
BRWD3	12694	254065	bromodomain and WD repeat domain containing 3	0.150521441159364	7.90915926171679	1.66781904712694	0.103566663703719	0.692683486043419	-4.41234303018531
ARHGAP30	5064	257106	Rho GTPase activating protein 30	0.180554410819623	8.84598665375795	1.66775302854735	0.103579861247926	0.692683486043419	-4.388560967836
ZNF691	2036	51058	zinc finger protein 691	-0.291136113793934	2.61925308688647	-1.66723454171682	0.103683558467848	0.693011056228902	-4.23787175573062
MYCBP2	15945	23077	MYC binding protein 2	-0.145284410413719	9.28308123975699	-1.66659102523593	0.103812380870817	0.693142079432667	-4.38327412037261
P2RY13	2764	53829	purinergic receptor P2Y13	0.292355798688342	6.44954632116832	1.66656309892558	0.103817974294226	0.693142079432667	-4.41625031497162
KIAA0895L	4780	653319	KIAA0895 like	-0.485954471162427	0.943565498641093	-1.66631670872778	0.103867335130523	0.693142079432667	-4.28108094292544
CEP83	6925	51134	centrosomal protein 83	-0.200188111354552	4.46544186931615	-1.66571604198571	0.103987751579789	0.693338882337873	-4.32325469710834
YEATS2	10212	55689	YEATS domain containing 2	-0.115043954771068	6.08112696741517	-1.6656235372603	0.104006306366806	0.693338882337873	-4.40628784579396
GCA	3664	25801	grancalcin	0.439992682232015	9.59912070645374	1.6651955063175	0.104092197296234	0.693371001833806	-4.36827249925859
TXNDC5	4387	81567	thioredoxin domain containing 5	0.670739602191961	2.19236202730994	1.66503663137286	0.10412409287968	0.693371001833806	-4.23992207151776
SLIRP	2631	81892	SRA stem-loop interacting RNA binding protein	-0.245624263710913	3.22076248121965	-1.66478138582483	0.10417535263617	0.693371001833806	-4.25533606548946
COX19	5542	90639	cytochrome c oxidase assembly factor COX19	-0.158762316122791	4.62946051791786	-1.66433864689506	0.104264315230627	0.693431376647817	-4.34563384819065
ZNF485	2397	220992	zinc finger protein 485	-0.407064815495094	2.10653237974618	-1.66412694022188	0.104306877084728	0.693431376647817	-4.24135256920101
TOR1AIP2	18876	163590	torsin 1A interacting protein 2	0.14753798236908	7.18086001527235	1.66346889365802	0.104439263455329	0.693431376647817	-4.42588580458246
SBNO2	6626	22904	strawberry notch homolog 2	0.44158235345802	6.51619183136642	1.66340971879531	0.104451175101011	0.693431376647817	-4.43117179300511
SPPL2B	7130	56928	signal peptide peptidase like 2B	-0.358521903194266	2.52591380005937	-1.66333377954696	0.104466462988997	0.693431376647817	-4.24547871435751
RAI1	9693	10743	retinoic acid induced 1	-0.390958622500549	2.54563668405956	-1.66285261859282	0.104563371981041	0.693431376647817	-4.24383686721013
ACTR3B	6024	57180	actin related protein 3B	0.319339809646168	1.44320604288836	1.66257113976566	0.104620098077114	0.693431376647817	-4.25520423711315
SAMD4A	12170	23034	sterile alpha motif domain containing 4A	-0.58306373315835	2.44027975286186	-1.66254353732155	0.104625662132745	0.693431376647817	-4.24104811857943
WDR75	5066	84128	WD repeat domain 75	-0.245180956558103	5.7512751673546	-1.66228816721046	0.104677150809303	0.693431376647817	-4.39334890664053
FASTK	3805	10922	Fas activated serine/threonine kinase	-0.32506301095434	3.42773790589919	-1.66044202783151	0.105049998861501	0.695067465318094	-4.28165981336453
LSM10	1496	84967	LSM10, U7 small nuclear RNA associated	0.306344391958379	3.76359472219956	1.66037813718358	0.105062921873472	0.695067465318094	-4.29915815651149
GGT1	4434	2678	gamma-glutamyltransferase 1	0.586144191444329	1.64212707903189	1.65999090100049	0.105141275306369	0.695067465318094	-4.24640457403473
REPS2	11311	9185	RALBP1 associated Eps domain containing 2	0.383560942816461	6.98955135809646	1.65997924945355	0.10514363362936	0.695067465318094	-4.43145906929118
CCT4	2830	10575	chaperonin containing TCP1 subunit 4	-0.238513992346811	6.10640705831243	-1.65943981273015	0.105252865732328	0.69542660269466	-4.41841084410892
YES1P1	1628	7526	YES1 pseudogene 1	-0.481705875536743	2.76896608826649	-1.65889594687648	0.105363089474921	0.695642657349167	-4.24672249254462
CARD16	1688	114769	caspase recruitment domain family member 16	0.310924639667984	6.25082616376894	1.65807230107633	0.105530196725092	0.695642657349167	-4.42365617481638
ZFP90	7015	146198	ZFP90 zinc finger protein	-0.21770987476902	5.47796897211874	-1.65754320948392	0.105637657959834	0.695642657349167	-4.39502167661528
CYP20A1	3079	57404	cytochrome P450 family 20 subfamily A member 1	-0.180227544541915	4.75330579801892	-1.65741491163731	0.105663729507455	0.695642657349167	-4.35507774013788
ZNF32	1436	7580	zinc finger protein 32	-0.363794568193071	3.42310383519027	-1.65667926789599	0.105813322963376	0.695642657349167	-4.2731336953067
GNB1	6417	2782	G protein subunit beta 1	0.128807293224639	7.69764345253377	1.65627961863006	0.105894664995074	0.695642657349167	-4.43158700055948
HPS4	10782	89781	HPS4 biogenesis of lysosomal organelles complex 3 subunit 2	-0.180864937814242	4.66579997585087	-1.6561708645804	0.105916809015261	0.695642657349167	-4.35180769078477
DNMT3A	12020	1788	DNA methyltransferase 3 alpha	0.194759902907331	5.59846460032042	1.65610067298115	0.105931103146739	0.695642657349167	-4.41067477363154
TBC1D17	4745	79735	TBC1 domain family member 17	0.255306215197311	3.50877236820937	1.6559441316302	0.105962987657994	0.695642657349167	-4.29478461695643
RAB11FIP1	9602	80223	RAB11 family interacting protein 1	0.184188575306878	8.65199108978977	1.65554982828366	0.106043334860296	0.695642657349167	-4.41236791510059
CSMD1	18705	64478	CUB and Sushi multiple domains 1	-1.45177204226852	-0.562305485566537	-1.65542136376753	0.106069522924269	0.695642657349167	-4.3871715092831
EXOSC8	3630	11340	exosome component 8	-0.241063503790976	4.1580989578231	-1.65537909409494	0.106078140951177	0.695642657349167	-4.3192978057006
RPS6KA3	8837	6197	ribosomal protein S6 kinase A3	0.173610563299077	8.44552322036606	1.65522797806178	0.106108955517053	0.695642657349167	-4.41913863316021
MTX1	3278	4580	metaxin 1	0.370198628704641	5.08862736850741	1.65512151975338	0.106130668210408	0.695642657349167	-4.38686171498764
PTPMT1	2740	114971	protein tyrosine phosphatase mitochondrial 1	-0.264449265417218	2.9093946544124	-1.65467210525625	0.106222368872754	0.695642657349167	-4.25843826527592
NXPE3	8635	91775	neurexophilin and PC-esterase domain family member 3	0.177313410056669	6.20805463883481	1.65434140134018	0.106289888974331	0.695642657349167	-4.42616553916456
TSEN54	3440	283989	tRNA splicing endonuclease subunit 54	-0.449760597766358	2.83738944417153	-1.6542112736171	0.106316466960768	0.695642657349167	-4.25930103251317
SLC38A6	5147	145389	solute carrier family 38 member 6	-0.22770341743209	3.64004663720563	-1.65368571876291	0.106423864860066	0.695642657349167	-4.29288517595701
NEFL	4329	4747	neurofilament light	-1.38580272234633	0.642457625176809	-1.65367306088794	0.106426452617619	0.695642657349167	-4.33174560050462
THOC1	8102	9984	THO complex 1	-0.230679225896012	5.47710091617791	-1.65339239057353	0.106483845774368	0.695642657349167	-4.39554692948664
RABL2A	6008	11159	RAB, member of RAS oncogene family like 2A	-0.419834254748904	1.94781210720204	-1.65328180187341	0.10650646662254	0.695642657349167	-4.25416184370153
CPQ	3457	10404	carboxypeptidase Q	0.241694611312373	7.03188325374214	1.65294488231606	0.106575407717673	0.695642657349167	-4.44034625126302
TVP23B	5862	51030	trans-golgi network vesicle protein 23 homolog B	-0.168730373405183	4.33511710094619	-1.65258985089028	0.106648094687108	0.695642657349167	-4.33218353991696
CCDC43	2855	124808	coiled-coil domain containing 43	-0.225940558878513	4.44990488495766	-1.65179062974716	0.106811871849139	0.695642657349167	-4.33500651712917
ZNF655	8401	79027	zinc finger protein 655	-0.0929338175915664	7.43381943069144	-1.65091395556167	0.106991759029918	0.695642657349167	-4.44221810390745
LY6E	2640	4061	lymphocyte antigen 6 family member E	-0.826445565652556	2.76636472601842	-1.65087468173268	0.106999823571961	0.695642657349167	-4.26228323228655
VPS39	8354	23339	VPS39 subunit of HOPS complex	0.124226005961629	6.36546272106227	1.65072690353457	0.107030173037561	0.695642657349167	-4.43900591842312
NDUFS1	12268	4719	NADH:ubiquinone oxidoreductase core subunit S1	-0.0954410341336969	6.54929322969374	-1.6504224400532	0.107092723587868	0.695642657349167	-4.44094425797263
DEPDC5	8196	9681	DEP domain containing 5, GATOR1 subcomplex subunit	-0.237878637002559	5.09538226929169	-1.65036215569618	0.107105112288282	0.695642657349167	-4.38059373522464
CCDC47	4537	57003	coiled-coil domain containing 47	0.131193927542468	6.29777512492756	1.64988339908193	0.10720354079761	0.695642657349167	-4.43427595950429
TNFRSF1B	3826	7133	TNF receptor superfamily member 1B	0.206260067640709	7.80760080986116	1.64976550240634	0.107227790834946	0.695642657349167	-4.43864242683813
PPCS	2590	79717	phosphopantothenoylcysteine synthetase	-0.127365590587075	4.8791611275744	-1.64975932072669	0.10722906246247	0.695642657349167	-4.37793525010381
IGKV3-15	442	28913	immunoglobulin kappa variable 3-15	0.77456470587123	1.43104426624264	1.64970845863632	0.107239525726921	0.695642657349167	-4.25343250699061
NGDN	4654	25983	neuroguidin	-0.218075969383175	4.55868698520889	-1.64961686093184	0.107258371174833	0.695642657349167	-4.34760943257436
IGLV1-40	407	28825	immunoglobulin lambda variable 1-40	1.0034433895043	0.834981750403703	1.64934100983867	0.107315141665348	0.695642657349167	-4.26552779575253
SH3TC2	15047	79628	SH3 domain and tetratricopeptide repeats 2	0.42392802256785	2.95699005461417	1.64831468098993	0.107526578742275	0.695642657349167	-4.27377260317045
DNAJC24	7592	120526	DnaJ heat shock protein family (Hsp40) member C24	-0.238113118397346	3.91074957564379	-1.64811073415521	0.107568635267538	0.695642657349167	-4.3142763838931
RRN3P1	5253	730092	RRN3 homolog, RNA polymerase I transcription factor pseudogene 1	-0.314982884504392	3.58778581238635	-1.64781563172784	0.107629513253776	0.695642657349167	-4.29360410281339
MS4A1	4872	931	membrane spanning 4-domains A1	-0.458937371590845	6.6949638907607	-1.64765479052537	0.107662705839501	0.695642657349167	-4.44082719105573
INTS8	7866	55656	integrator complex subunit 8	-0.111496203615176	6.88212155923649	-1.64751936870383	0.107690659195957	0.695642657349167	-4.44597362332558
TUBB2A	1727	7280	tubulin beta 2A class IIa	1.87700026551466	2.31348803510853	1.64739687325703	0.107715949476461	0.695642657349167	-4.26097760034396
HMGN1P4	290	100036575	high mobility group nucleosome binding domain 1 pseudogene 4	-0.273863688904635	2.20274327630689	-1.64735218423594	0.107725177141741	0.695642657349167	-4.25609308941824
MRPL53	1344	116540	mitochondrial ribosomal protein L53	-0.336369106228618	1.4703008211981	-1.64726455628274	0.107743272992253	0.695642657349167	-4.26894661219781
SPIN3	5560	169981	spindlin family member 3	-0.393793262299865	3.50372812162633	-1.64712865354342	0.107771342909796	0.695642657349167	-4.29005590699626
KLF6	6139	1316	Kruppel like factor 6	0.211548131747225	8.44821270083754	1.64662667715839	0.107875075391168	0.695642657349167	-4.4293284736715
BCL2A1	1089	597	BCL2 related protein A1	0.416110850566338	6.70622610824856	1.6464545314701	0.107910667895547	0.695642657349167	-4.4468222025607
MICAL2	15809	9645	microtubule associated monooxygenase, calponin and LIM domain containing 2	0.414362192609241	8.46546521313465	1.64592329945947	0.108020565327515	0.695642657349167	-4.42725860516668
CD72	3386	971	CD72 molecule	-0.515789081147871	2.88788429572641	-1.64587316902077	0.108030940704453	0.695642657349167	-4.26748641711989
ZNF330	2536	27309	zinc finger protein 330	-0.183131730457397	4.97349247257509	-1.64532307865238	0.108144845480174	0.695642657349167	-4.38151290862981
SMARCAD1	6313	56916	SWI/SNF-related, matrix-associated actin-dependent regulator of chromatin, subfamily a, containing DEAD/H box 1	-0.204751393174882	5.58269127303648	-1.64385241280486	0.108449855135469	0.695642657349167	-4.41592861081702
ALDH6A1	6680	4329	aldehyde dehydrogenase 6 family member A1	-0.301421915090699	3.96952845648695	-1.6434954694416	0.108523990262947	0.695642657349167	-4.31705328156849
CORO1C	6532	23603	coronin 1C	0.208301285414055	7.20851171437611	1.64337465695043	0.108549091778844	0.695642657349167	-4.45262356754323
ETV6	7075	2120	ETS variant transcription factor 6	0.252418909191753	5.7412639940197	1.64282445867361	0.108663468274518	0.695642657349167	-4.4309559390957
CNPY2	2956	10330	canopy FGF signaling regulator 2	-0.242721900627259	3.09026883816191	-1.64268425859858	0.10869262923516	0.695642657349167	-4.28173544041461
NAV3	12135	89795	neuron navigator 3	-0.824835953781693	1.07334942478757	-1.64262151831726	0.10870568100521	0.695642657349167	-4.29662770076546
SNORD3A	699	780851	small nucleolar RNA, C/D box 3A	-0.337374770924207	5.26223447379882	-1.64241286584821	0.108749095949342	0.695642657349167	-4.41972582567931
MTERF1	4890	7978	mitochondrial transcription termination factor 1	-0.196337678169736	4.69161822223931	-1.6422254219106	0.108788110130412	0.695642657349167	-4.36483255979955
ROPN1L	1817	83853	rhophilin associated tail protein 1 like	0.474355732800518	3.83453591491814	1.64222485224182	0.108788228717601	0.695642657349167	-4.32964762888489
LTBP2	9091	4053	latent transforming growth factor beta binding protein 2	0.543049561742009	3.13183142920439	1.64212441817857	0.108809137603889	0.695642657349167	-4.29315763713971
TOMM20P2	421	101927540	TOMM20 pseudogene 2	-0.370810390381725	2.87181828952383	-1.64177739509307	0.108881408117559	0.695642657349167	-4.27106816114921
MAPK3	3669	5595	mitogen-activated protein kinase 3	0.323278006544295	5.33244572749969	1.64134451071531	0.108971615307482	0.695642657349167	-4.41587360362881
LAMB2	6865	3913	laminin subunit beta 2	0.451575278245441	1.40557137518333	1.64113716768476	0.109014844525453	0.695642657349167	-4.27622107902024
HNRNPA1P21	961	344697	heterogeneous nuclear ribonucleoprotein A1 pseudogene 21	-1.02968614787705	0.0463329792315734	-1.64110267568703	0.109022037174753	0.695642657349167	-4.35357360564334
HTATSF1P2	631	401233	HIV-1 Tat specific factor 1 pseudogene 2	0.588924845104834	3.32930521958678	1.64094719946328	0.10905446362454	0.695642657349167	-4.29114789144436
SERGEF	3502	26297	secretion regulating guanine nucleotide exchange factor	-0.235791878080253	3.91218204185991	-1.64088227269019	0.109068007236704	0.695642657349167	-4.32345269200041
ZNF471	6783	57573	zinc finger protein 471	-0.613258445301131	0.681628549028629	-1.6403062889335	0.109188217014582	0.695642657349167	-4.31996814941762
CENPCP1	2578	1061	centromere protein C pseudogene 1	-0.264396707677957	2.79998566576213	-1.6399469932387	0.109263258406247	0.695642657349167	-4.26898156724096
NDUFAB1	1600	4706	NADH:ubiquinone oxidoreductase subunit AB1	-0.269050423364253	3.11036490810212	-1.63945880919224	0.109365286957971	0.695642657349167	-4.28598789232386
SEMA6A-AS1	2829	101927233	SEMA6A antisense RNA 1	-0.431036516379124	1.68645253042249	-1.63829057098735	0.109609762138491	0.695642657349167	-4.27220962051263
BRPF3	6613	27154	bromodomain and PHD finger containing 3	0.208723294376625	4.40157320789459	1.63811967324507	0.109645563241742	0.695642657349167	-4.36314343791634
SEC24A	7201	10802	SEC24 homolog A, COPII coat complex component	0.178225413419803	5.69484628378898	1.63788094732954	0.109695589651455	0.695642657349167	-4.4306476176407
TMEM88	875	92162	transmembrane protein 88	0.609216262885465	0.288974137716395	1.6376788066747	0.109737964070326	0.695642657349167	-4.32001826499449
ZHX1	6741	11244	zinc fingers and homeoboxes 1	-0.162986577300933	5.47885452888253	-1.63723016771122	0.109832059588948	0.695642657349167	-4.41780245566379
DNAJC10	21826	54431	DnaJ heat shock protein family (Hsp40) member C10	-0.207417979200915	6.88252525140667	-1.63716038669548	0.109846701101429	0.695642657349167	-4.45973820071286
ADCY3	6058	109	adenylate cyclase 3	0.383019128069674	2.99249681800741	1.63711078633868	0.109857109265863	0.695642657349167	-4.29105699192029
STON2	6675	85439	stonin 2	0.303258469027194	5.73387789029228	1.63659951732512	0.10996444145058	0.695642657349167	-4.43765753219139
CTIF	8100	9811	cap binding complex dependent translation initiation factor	0.447989491686881	1.56492121288592	1.63655961993128	0.109972820848757	0.695642657349167	-4.27163312055672
BRIX1	5011	55299	biogenesis of ribosomes BRX1	-0.210010320896859	4.4776248800147	-1.63650647356433	0.109983983660079	0.695642657349167	-4.35854795830772
UTP3	2073	57050	UTP3 small subunit processome component	-0.201986109889678	4.51889612682527	-1.63640415566723	0.110005477033133	0.695642657349167	-4.36154781956168
RMI1	3507	80010	RecQ mediated genome instability 1	0.362896803139783	3.84008237654074	1.63624565606601	0.110038779009158	0.695642657349167	-4.32931574171293
TMCC1-AS1	4623	100507032	TMCC1 antisense RNA 1 (head to head)	-0.458244854843487	1.2299076327532	-1.63601329076287	0.110087615703924	0.695642657349167	-4.29143818301785
LASP1	7061	3927	LIM and SH3 protein 1	0.177392718380108	7.48892109305943	1.63591633151141	0.110107999093952	0.695642657349167	-4.46184995956005
[truncated: 10,667 more rows]

## Sheet: 2 T1RNR
GeneID		Length	entrezid	name	logFC	AveExpr	t	P.Value	adj.P.Val	B		Whole blood transcriptional profiling
RNF182		4090	221687	ring finger protein 182	-3.0246296076013	5.67050143256576	-4.24613558657298	0.000134994583678521	0.99842033550169	-2.36904465732744		Comparison between responders (n = 9) vs. non-responders (n = 11)
PAG1		11023	55824	phosphoprotein membrane anchor with glycosphingolipid microdomains 1	0.454585707997019	8.31250882185794	4.13629898522769	0.000187870636392429	0.99842033550169	-2.16464033874268		at follow-up with VDZ therapy.
ARRDC3		4934	57561	arrestin domain containing 3	-0.441545049216653	9.00922906130732	-3.72348033551056	0.000634940710132073	0.99842033550169	-2.63531543159378
LINC01506		526	101927015	long intergenic non-protein coding RNA 1506	-0.823934404744683	4.11150830929333	-3.65036053253698	0.000784152880121916	0.99842033550169	-3.1972088190167
DLEU7		3656	220107	deleted in lymphocytic leukemia 7	-1.38943517426675	1.04944369075769	-3.61544178439455	0.000866840106822464	0.99842033550169	-4.17237464199217
RNASE6		1061	6039	ribonuclease A family member k6	-0.686948684191195	5.48888581134971	-3.53553813277133	0.00108884231754729	0.99842033550169	-2.89259615481054
ATP6V1E1P1		681	343515	ATPase H+ transporting V1 subunit E1 pseudogene 1	-0.525737335790286	2.10300545782524	-3.48979818566501	0.00123954537265484	0.99842033550169	-3.95962164529429
CCDC144B		9762	284047	coiled-coil domain containing 144B (pseudogene)	-1.06773778673282	3.89710463379527	-3.48131586154644	0.00126961096629935	0.99842033550169	-3.38797787773343
ATP13A3		11864	79572	ATPase 13A3	0.38257469367634	7.07728804746359	3.40254825407574	0.00158428386702518	0.99842033550169	-2.81202644419732
SMG1P4		6290	100507526	SMG1 pseudogene 4	0.72825152050147	1.97646860920023	3.37916019941557	0.00169126735274449	0.99842033550169	-3.97135320396406
DBF4P1		1892	645084	DBF4 zinc finger pseudogene 1	-0.570857819698259	2.8165023175661	-3.32388414094128	0.00197223794423953	0.99842033550169	-3.82038161596171
POLB		4106	5423	DNA polymerase beta	-0.467388876904459	5.23992142118391	-3.21822386757858	0.00263773508129377	0.99842033550169	-3.16310134087539
IL18		2628	3606	interleukin 18	-0.628999412244857	3.01536992393382	-3.1279970583743	0.00337000850901561	0.99842033550169	-3.84840623637101
ZNF93		4888	81931	zinc finger protein 93	-0.423769185574201	3.62763646089649	-3.08631806283267	0.0037698033173488	0.99842033550169	-3.64931764766172
KCNQ1OT1		91667	10984	KCNQ1 opposite strand/antisense transcript 1	0.529679346363477	4.4360935889156	3.06751153202778	0.00396451166962851	0.99842033550169	-3.40568713031702
DESI1		4972	27351	desumoylating isopeptidase 1	0.298483791612675	4.53077631099872	3.04395633938896	0.00422178402296227	0.99842033550169	-3.43785526780154
FAM111A		7221	63901	family with sequence similarity 111 member A	-0.331099885592302	7.32689486040209	-3.01537815208801	0.0045550551279439	0.99842033550169	-3.18631104070776
KANSL1		13928	284058	KAT8 regulatory NSL complex subunit 1	0.372793956184595	7.35936415261103	3.01404989081149	0.00457113205869595	0.99842033550169	-3.18652349572502
SDCBP2-AS1		4058	100507495	SDCBP2 antisense RNA 1	0.45814622053017	2.45067909129135	2.98807452713956	0.00489647063906172	0.99842033550169	-3.98590592358133
RHEBP2		600	101060032	RHEB pseudogene 2	-0.634370145842354	1.24037774566768	-2.97177133976496	0.00511165773045943	0.99842033550169	-4.24721720989589
SPRY3		9019	10251	sprouty RTK signaling antagonist 3	0.593483799945104	2.61617421214199	2.96863645746716	0.00515404089658476	0.99842033550169	-3.96290175943356
ACSM3		7822	6296	acyl-CoA synthetase medium chain family member 3	0.864280055783248	3.68228961166929	2.96392539118014	0.00521835503345173	0.99842033550169	-3.70937215783936
MAST4		14675	375449	microtubule associated serine/threonine kinase family member 4	0.440715163374617	4.46760691271014	2.9638927581172	0.00521880314778565	0.99842033550169	-3.51635578061431
ABHD3		4366	171586	abhydrolase domain containing 3	-0.395997474125975	6.61645315085701	-2.9603725355035	0.00526735529186167	0.99842033550169	-3.23804603953779
TMSB4XP6		135	7120	TMSB4X pseudogene 6	-0.282885425004596	7.64931899695295	-2.94797484793749	0.00544174628123879	0.99842033550169	-3.25496344385603
NAV3		12135	89795	neuron navigator 3	-1.43880981029716	1.07334942478757	-2.94412587219379	0.00549698031535736	0.99842033550169	-4.2961609832456
RAB37		5074	326624	RAB37, member RAS oncogene family	-0.295519469130864	6.11892982460584	-2.91092500783906	0.00599573236676856	0.99842033550169	-3.31363448772651
DHRS4		2305	10901	dehydrogenase/reductase 4	-0.581669891280949	1.38285374212006	-2.90238295122302	0.00613074380634493	0.99842033550169	-4.23751981646457
RPL26P30		645	653147	ribosomal protein L26 pseudogene 30	-0.631405393764701	0.876566334170756	-2.90088085031126	0.00615477752502643	0.99842033550169	-4.31917652453211
RPGRIP1		5470	57096	RPGR interacting protein 1	-0.88081972211204	3.65653632189423	-2.88290386751433	0.00644933619728943	0.99842033550169	-3.76982206367565
PM20D2		4708	135293	peptidase M20 domain containing 2	0.300733265753472	4.3031517891247	2.88024239642612	0.00649404951077707	0.99842033550169	-3.61622183775255
TMSB4X		1705	7114	thymosin beta 4 X-linked	-0.270664229932599	9.06691407957726	-2.86421476322207	0.00676950358888776	0.99842033550169	-3.4148581937508
NINJ1		2648	4814	ninjurin 1	-0.546006128593774	4.70676144811023	-2.86105260313327	0.00682512253233213	0.99842033550169	-3.49415756896651
GTF2H2		8676	2966	general transcription factor IIH subunit 2	-0.67714466942058	2.98962316421692	-2.854047065341	0.00694986595830937	0.99842033550169	-3.94767580445704
CNPY3		1712	10695	canopy FGF signaling regulator 3	-0.307102157376209	5.89859492628346	-2.84478968418213	0.00711797300971824	0.99842033550169	-3.38288665566677
LINC00654		6294	149837	long intergenic non-protein coding RNA 654	0.907733246872167	1.88299391471957	2.84313833528191	0.00714835621923441	0.99842033550169	-4.16041110297071
LINC01003		1764	100128822	long intergenic non-protein coding RNA 1003	-0.536143931772181	2.00342118297029	-2.82400668981047	0.0075092925399455	0.99842033550169	-4.15118144897681
CYFIP2		10498	26999	cytoplasmic FMR1 interacting protein 2	0.266309198004908	8.15004707353831	2.81025843068194	0.00777907905345853	0.99842033550169	-3.40652564802928
KLHL6		10546	89857	kelch like family member 6	0.305637460356166	6.49949910267041	2.80281442103196	0.00792889605856294	0.99842033550169	-3.38883936358405
KCNH3		4265	23416	potassium voltage-gated channel subfamily H member 3	1.19731668739564	0.750973599849941	2.78238236072613	0.00835402415611126	0.99842033550169	-4.28739614547133
FLNB		13952	2317	filamin B	0.631348270991905	5.90348986439602	2.76428365924191	0.00874820914792361	0.99842033550169	-3.4586897498161
TMSB4XP8		135	7117	TMSB4X pseudogene 8	-0.268483633233728	8.4153631336659	-2.75613665954516	0.0089312288431391	0.99842033550169	-3.4634204548774
VOPP1		5364	81552	VOPP1 WW domain binding protein	0.29796287499968	4.70685870407159	2.74606750088352	0.00916234022698732	0.99842033550169	-3.61919744298797
B2M		6089	567	beta-2-microglobulin	-0.294436095332758	13.116763609758	-2.73947576698979	0.00931662864060643	0.99842033550169	-3.82002118679033
C3AR1		2145	719	complement C3a receptor 1	0.865151616132291	4.03196479977399	2.71992022203556	0.00978864313498619	0.99842033550169	-3.77468249588529
CA13		5528	377677	carbonic anhydrase 13	-0.472902885794587	2.47700398388378	-2.70951725262183	0.0100486764971576	0.99842033550169	-4.09888912167351
POPDC2		2445	64091	popeye domain containing 2	0.723319123813494	0.793289258101245	2.70443402136399	0.0101780498927152	0.99842033550169	-4.35511013623503
MITD1		4305	129531	microtubule interacting and trafficking domain containing 1	-0.256128394509032	5.61071531526534	-2.6976777127844	0.0103523912444489	0.99842033550169	-3.56096146875362
VWDE		6490	221806	von Willebrand factor D and EGF domains	-1.6683401046925	1.01767028805123	-2.68252449715856	0.0107534998891212	0.99842033550169	-4.35596062961354
STYXL1		2028	51657	serine/threonine/tyrosine interacting like 1	-0.46310254155682	3.68771362122996	-2.67905720136385	0.0108472769692081	0.99842033550169	-3.8807571347026
GALNT14		4567	79623	polypeptide N-acetylgalactosaminyltransferase 14	1.35080611543535	3.35198107432364	2.6487439039142	0.0116998936492139	0.99842033550169	-3.96061746599421
IGLV7-43		385	28776	immunoglobulin lambda variable 7-43	-1.77033900395167	0.0905261560906963	-2.63890719950512	0.0119895849748154	0.99842033550169	-4.45392295573399
SMS		2160	6611	spermine synthase	-0.299929368619151	3.97910212956101	-2.63814958909805	0.0120121685666961	0.99842033550169	-3.84901959668315
CIR1		3181	9541	corepressor interacting with RBPJ, 1	-0.275205548268538	6.57584241804651	-2.6338795128184	0.0121401898798539	0.99842033550169	-3.55321862180459
PSMA3-AS1		7409	379025	PSMA3 antisense RNA 1	-0.22075572035284	7.63799211658535	-2.63107367908433	0.0122249947291779	0.99842033550169	-3.54523219229915
TMCC1		7819	23023	transmembrane and coiled-coil domain family 1	-0.375285972930778	6.71576857820764	-2.61805489323739	0.0126256651824748	0.99842033550169	-3.5538993243585
HERPUD1		5155	9709	homocysteine inducible ER protein with ubiquitin like domain 1	-0.216646750538715	6.28722174078258	-2.61643391723337	0.0126763902021699	0.99842033550169	-3.5662647713718
TOMM40L		3361	84134	translocase of outer mitochondrial membrane 40 like	0.364563216742384	3.4101564769042	2.6163493874724	0.0126790405196995	0.99842033550169	-3.93382387566391
ESYT1		5493	23344	extended synaptotagmin 1	0.468115020987248	7.02355908422367	2.60791908423311	0.0129459367455112	0.99842033550169	-3.56053891709292
TBCA		3058	6902	tubulin folding cofactor A	-0.234390462806865	3.60119031471394	-2.58903145908709	0.0135627572726207	0.99842033550169	-3.95083868001409
GBAP1		3656	2630	glucosylceramidase beta pseudogene 1	0.737951678685042	0.660621848525161	2.58594321328014	0.0136661419409598	0.99842033550169	-4.38897139371973
CDK5RAP2		10080	55755	CDK5 regulatory subunit associated protein 2	0.301091237272699	6.69659235920944	2.58231962586512	0.0137883705197841	0.99842033550169	-3.585684288394
MAOA		5528	4128	monoamine oxidase A	-1.56946955795989	1.8918076317202	-2.57608786911796	0.0140009254753471	0.99842033550169	-4.29322117059063
ZBTB8OS		3531	339487	zinc finger and BTB domain containing 8 opposite strand	-0.286686664582605	4.35190034428194	-2.56573779964751	0.0143606022917837	0.99842033550169	-3.82377758207377
ZNF350		4539	59348	zinc finger protein 350	-0.216831235179945	5.67307369969445	-2.5653237712617	0.0143751649590695	0.99842033550169	-3.66847713175535
MYO10		13963	4651	myosin X	1.16391510664885	1.77620936609556	2.56063676915798	0.0145409682062149	0.99842033550169	-4.27844125875663
FMN1		20084	342184	formin 1	-1.03400353099797	3.73135732988261	-2.55432736716585	0.014766932202266	0.99842033550169	-3.97714988545472
SEMA3C		6268	10512	semaphorin 3C	-0.617367113332528	4.19564630319467	-2.54930333051434	0.0149491580420897	0.99842033550169	-3.85748951956684
XKR3		1690	150165	XK related 3	-1.71556582063721	0.724172762413305	-2.549252819066	0.014951000544507	0.99842033550169	-4.39637409586575
TOMM7		1751	54543	translocase of outer mitochondrial membrane 7	0.361126488301677	5.31852740638199	2.54835789326543	0.014983679189582	0.99842033550169	-3.68634821523311
CCDC144A		15568	9720	coiled-coil domain containing 144A	-1.67417750255289	2.05298626776114	-2.53304746546729	0.0155529721350035	0.99842033550169	-4.28207669459224
PLCXD1		6191	55344	phosphatidylinositol specific phospholipase C X domain containing 1	0.49699591038249	2.12120432467619	2.52960386876968	0.0156837123681797	0.99842033550169	-4.18597746383126
DYNC1LI1		6132	51143	dynein cytoplasmic 1 light intermediate chain 1	-0.286472705201253	6.53378302012253	-2.51691499357912	0.0161741810616485	0.99842033550169	-3.63697391906557
PFDN2		677	5202	prefoldin subunit 2	-0.284312851790775	2.66807099716622	-2.5164150909498	0.0161937879195512	0.99842033550169	-4.1568441648618
PRKG1		7507	5592	protein kinase cGMP-dependent 1	-0.947740650110106	2.37405850750607	-2.51340280666981	0.0163123941231454	0.99842033550169	-4.22376689266719
ANKRD55		2979	79722	ankyrin repeat domain 55	0.787120657284863	2.42902154804275	2.51163889575972	0.0163822144755358	0.99842033550169	-4.19231316879589
CDK1		3931	983	cyclin dependent kinase 1	-0.752094919717829	1.28008006313813	-2.50440393717667	0.0166714581603498	0.99842033550169	-4.365614375059
TNRC6C		11111	57690	trinucleotide repeat containing adaptor 6C	0.266687002183961	5.8805409854502	2.49693313928004	0.0169750153992496	0.99842033550169	-3.67903941856371
FANCA		9736	2175	FA complementation group A	-0.499045354636391	3.21678720346707	-2.49445389535652	0.0170768622741867	0.99842033550169	-4.03691779853027
IL13RA1		4372	3597	interleukin 13 receptor subunit alpha 1	-0.480142119547039	7.52114433041164	-2.48169351619608	0.0176099259535432	0.99842033550169	-3.6702625730463
APOL2		3484	23780	apolipoprotein L2	-0.395285367684365	6.97824356367711	-2.48084636308194	0.0176458468906167	0.99842033550169	-3.66853247804238
HAUS1		2165	115106	HAUS augmin like complex subunit 1	-0.41524668111475	3.78321225727146	-2.48010395047023	0.0176773815028626	0.99842033550169	-3.97389377484476
HMGB1P5		1111	10354	high mobility group box 1 pseudogene 5	-0.203200219681844	5.8873476194159	-2.47812429231825	0.0177617203279213	0.99842033550169	-3.71591694785483
IGKV3D-15		396	28875	immunoglobulin kappa variable 3D-15 (gene/pseudogene)	-1.45007177441577	0.181027107611468	-2.47688939740313	0.0178145156840259	0.99842033550169	-4.43881226385101
GBP3		4297	2635	guanylate binding protein 3	-0.62067837490943	5.66550905880979	-2.46525157287052	0.0183191322434428	0.99842033550169	-3.74311747376497
PI3		577	5266	peptidase inhibitor 3	1.22413421361219	3.91759113155393	2.4626928867293	0.0184318069431076	0.99842033550169	-3.98090974211284
CFAP54		12914	144535	cilia and flagella associated protein 54	-0.598588348445481	1.90921488122431	-2.45501457325802	0.0187737256733003	0.99842033550169	-4.28930815032707
FBXO31		6897	79791	F-box protein 31	0.579010485053501	2.78052613748929	2.453888857234	0.0188243362775701	0.99842033550169	-4.10551781854259
HLA-C		2507	3107	major histocompatibility complex, class I, C	-0.390955227527451	10.3031518661174	-2.4358484288099	0.019652508315656	0.99842033550169	-3.84139082378702
USP32P1		7676	162632	ubiquitin specific peptidase 32 pseudogene 1	-1.9312449151192	-0.175406471102782	-2.43512291570318	0.0196864957761936	0.99842033550169	-4.48899783748536
CSTA		1373	1475	cystatin A	-0.516240891173665	5.57380107804184	-2.42937653005294	0.0199575822649484	0.99842033550169	-3.78614128773413
NDFIP1		6024	80762	Nedd4 family interacting protein 1	0.192221637705061	6.03174445273917	2.42473023422614	0.0201792437677933	0.99842033550169	-3.75286675509698
LRRC37A2		6756	474170	leucine rich repeat containing 37 member A2	0.412186277434716	3.557691046337	2.42191911210346	0.0203144363306785	0.99842033550169	-4.03395060741444
LINC00205		1391	642852	long intergenic non-protein coding RNA 205	0.605424809826764	1.13286486063679	2.42046503103249	0.0203846878916052	0.99842033550169	-4.36574069916754
TRAJ11		60	28744	T cell receptor alpha joining 11	0.900110010914896	0.969834743381887	2.42007928879277	0.0204033613362094	0.99842033550169	-4.37853459168859
FGFR2		7486	2263	fibroblast growth factor receptor 2	1.96129573345079	0.585696850247761	2.41340896892589	0.0207287281205856	0.99842033550169	-4.38780152310811
MPPE1		7630	65258	metallophosphoesterase 1	-0.291359830570991	6.63507607936849	-2.41317428364812	0.0207402608302208	0.99842033550169	-3.72319941255365
DAZAP2		5731	9802	DAZ associated protein 2	-0.236189173840895	8.83718029439047	-2.41050071423261	0.0208720542046954	0.99842033550169	-3.77274672271464
SYNM		7819	23336	synemin	-0.690996004783001	3.60869715314352	-2.40816028481813	0.0209880478282446	0.99842033550169	-4.03931655218423
SNN		3312	8303	stannin	-0.445594219411729	6.91533015594558	-2.40084684158448	0.0213542809747205	0.99842033550169	-3.73419270192343
PRKCA		11152	5578	protein kinase C alpha	0.463952009367318	5.51653972704929	2.39172532063514	0.021819160173375	0.99842033550169	-3.79119327773521
MOSPD1		2675	56180	motile sperm domain containing 1	-0.484336116659783	4.61180277600372	-2.38854221274774	0.02198353021108	0.99842033550169	-3.90099956319801
IKZF2		12240	22807	IKAROS family zinc finger 2	0.749330185075002	5.79923572856711	2.381563611101	0.0223478179323126	0.99842033550169	-3.79872860307894
CPPED1		6484	55313	calcineurin like phosphoesterase domain containing 1	-0.320734415615769	8.79382925016163	-2.37950012360305	0.0224565737933655	0.99842033550169	-3.80044534257768
TTBK2		12917	146057	tau tubulin kinase 2	0.150166590992437	6.055929882682	2.37755774698314	0.0225593832907507	0.99842033550169	-3.77962046680531
ICA1		4891	3382	islet cell autoantigen 1	-0.418198618133266	2.16977007855786	-2.37735167124791	0.0225703157428876	0.99842033550169	-4.28654518643203
ARFIP1		4269	27236	ADP ribosylation factor interacting protein 1	-0.237497213272034	6.19554454719883	-2.37114358450368	0.0229019110609706	0.99842033550169	-3.77637523371721
TATDN3		3788	128387	TatD DNase domain containing 3	-0.261542507178218	4.29980053652665	-2.36566939761585	0.0231979494679713	0.99842033550169	-3.95775143728456
VDAC3		3141	7419	voltage dependent anion channel 3	-0.195320689080138	5.91147159993371	-2.3613493177729	0.0234340087299355	0.99842033550169	-3.80245625021455
TMEM50A		3410	23585	transmembrane protein 50A	-0.284438449086702	7.07707159243266	-2.35937764493928	0.0235424641475417	0.99842033550169	-3.77295145328269
KIAA1211L		4705	343990	KIAA1211 like	-0.983869413021243	0.507452072716521	-2.35733200552433	0.0236554666593536	0.99842033550169	-4.43773637736196
RNF114		4344	55905	ring finger protein 114	-0.192069761816738	6.18873039228437	-2.35353124189395	0.0238667231315124	0.99842033550169	-3.78918730867879
VSIG10		8350	54621	V-set and immunoglobulin domain containing 10	-1.14439864258285	1.87505740218801	-2.35068322208485	0.024026136927344	0.99842033550169	-4.3274583796334
TMSB4XP2		210	7116	TMSB4X pseudogene 2	-0.373198208589275	4.11266401100026	-2.34915952407856	0.0241118172830729	0.99842033550169	-3.9994090671199
LIPH		4122	200879	lipase H	-0.765878822184684	1.65106226071246	-2.34833883363032	0.0241580802526571	0.99842033550169	-4.34684506557998
NDUFA5P11		343	102724866	NADH:ubiquinone oxidoreductase subunit A5 pseudogene 11	-0.461200658289161	2.41594897595981	-2.34766267714467	0.0241962558196164	0.99842033550169	-4.27007556363409
CDK5RAP3		6070	80279	CDK5 regulatory subunit associated protein 3	-0.231232930077166	7.04322056768557	-2.34627782137502	0.0242746140615037	0.99842033550169	-3.78336864118182
SNX11		3606	29916	sorting nexin 11	-0.282093567059198	4.74246038897327	-2.34588301223209	0.0242969950969025	0.99842033550169	-3.91054567585439
HS2ST1		7429	9653	heparan sulfate 2-O-sulfotransferase 1	0.266824042811039	5.09283618995276	2.34050984096246	0.0246034445444118	0.99842033550169	-3.87486352063158
LINC00852		1328	84657	long intergenic non-protein coding RNA 852	0.527446354274597	2.18090784928766	2.34017771881681	0.0246225003048058	0.99842033550169	-4.25993858120244
KIAA1671		16439	85379	KIAA1671	0.975380863070307	1.11895367799447	2.33890412626824	0.0246956969226252	0.99842033550169	-4.36510400546041
RPS26P3		348	441386	ribosomal protein S26 pseudogene 3	-1.35979948546001	0.737751803471162	-2.33851165324265	0.0247182928143418	0.99842033550169	-4.44344704865917
CHRM3-AS2		3888	100506915	CHRM3 antisense RNA 2	0.835355144882213	4.61751674258364	2.337065558049	0.0248017097687626	0.99842033550169	-3.92231095277161
RBP7		861	116362	retinol binding protein 7	-0.677860867399624	4.26682462093497	-2.33619133665854	0.0248522614450562	0.99842033550169	-3.99984259130924
SNX6P1		1224	126506	sorting nexin 6 pseudogene 1	-0.503814010260767	1.37962188288714	-2.33554476299447	0.0248897090929987	0.99842033550169	-4.38761213770402
RCN3		2093	57333	reticulocalbin 3	-0.669249817960658	2.7154803313111	-2.33044804974682	0.0251866786097473	0.99842033550169	-4.15107202723313
PAGR1		1702	79447	PAXIP1 associated glutamate rich protein 1	0.758645715253495	-0.61416190147863	2.32824719102513	0.0253158985750445	0.99842033550169	-4.46186236555086
KIF27		5140	55582	kinesin family member 27	-0.64474486698111	4.98738775998976	-2.32713938614231	0.0253811670100209	0.99842033550169	-3.91604562725623
GABRR2		2230	2570	gamma-aminobutyric acid type A receptor rho2 subunit	0.958928062714452	1.41042181537333	2.32232223121788	0.0256667425255284	0.99842033550169	-4.36689086130331
SPTBN1		18504	6711	spectrin beta, non-erythrocytic 1	0.430703846004213	7.97129925854645	2.31975370305162	0.0258201907508305	0.99842033550169	-3.82113701397698
DLEU2		5173	8847	deleted in lymphocytic leukemia 2	-0.327017598447944	6.70463739563626	-2.31778917755515	0.0259381109211116	0.99842033550169	-3.80861650202036
GTF2H2B		3979	653238	general transcription factor IIH subunit 2B (pseudogene)	-0.652958013053671	1.35319875849365	-2.31712414930461	0.0259781386140783	0.99842033550169	-4.38766362296043
NRXN1		24320	9378	neurexin 1	-0.9799039793985	1.54804649567115	-2.31528307688034	0.0260892415266746	0.99842033550169	-4.36899664853989
HEIH		1652	100859930	hepatocellular carcinoma up-regulated EZH2-associated long non-coding RNA	-0.244338345031103	4.0473156508467	-2.31444307291598	0.0261400748259235	0.99842033550169	-4.02246960195854
EEF2K		8020	29904	eukaryotic elongation factor 2 kinase	0.619293749517487	3.93571610357056	2.30251565405509	0.0268715335308604	0.99842033550169	-4.03034040715287
PDP2		8364	57546	pyruvate dehyrogenase phosphatase catalytic subunit 2	0.533377365757508	2.57493836238026	2.30218290881801	0.0268922002933806	0.99842033550169	-4.21628473103607
MED18		2019	54797	mediator complex subunit 18	-0.248952349952016	3.95566339328534	-2.29883533161464	0.0271009129442066	0.99842033550169	-4.04392552830176
ZNF487		4976	642819	zinc finger protein 487	-0.359008100747597	4.233847083946	-2.29233851934048	0.0275101240691041	0.99842033550169	-4.01244600957183
APTR		3100	100505854	Alu-mediated CDKN1A/p21 transcriptional regulator	-0.448979722061357	2.60522995811657	-2.29090521991284	0.0276011452154721	0.99842033550169	-4.24899866197893
TMEM252		1245	169693	transmembrane protein 252	-0.715613823258393	2.0867253273782	-2.28924007581237	0.0277072285780398	0.99842033550169	-4.32599626200423
GAS6-AS1		7169	650669	GAS6 antisense RNA 1	0.764004807585937	1.57730564839686	2.28834007722729	0.0277647179279746	0.99842033550169	-4.32743680895896
UBASH3B		9011	84959	ubiquitin associated and SH3 domain containing B	0.245559557471926	5.49202631104844	2.28525545299963	0.0279625670779247	0.99842033550169	-3.88179332687643
RFC2		2211	5982	replication factor C subunit 2	-0.25812061589562	4.09088493000889	-2.28228229465341	0.0281544615995936	0.99842033550169	-4.03599413564809
LINC00243		2171	401247	long intergenic non-protein coding RNA 243	-0.49465374262931	3.3419544802994	-2.27953025352589	0.0283331352845862	0.99842033550169	-4.13289718788898
ANGPT1		7128	284	angiopoietin 1	-0.64684924073178	4.17690582489238	-2.2783821998804	0.0284079713249398	0.99842033550169	-4.03341963654881
TTC33		6821	23548	tetratricopeptide repeat domain 33	-0.244862260902402	4.96028984308408	-2.27240693537724	0.0288003353312579	0.99842033550169	-3.95452370917877
RSBN1		6819	54665	round spermatid basic protein 1	0.28760593502281	6.65680226283199	2.27021725114888	0.0289453304125553	0.99842033550169	-3.85270883042344
ETS1		7149	2113	ETS proto-oncogene 1, transcription factor	0.48834914659392	8.8055300993484	2.26520686713526	0.0292795649539042	0.99842033550169	-3.89217245169478
FSTL1		8727	11167	follistatin like 1	-0.869652285795289	3.9334538139075	-2.26231745848396	0.0294738783289929	0.99842033550169	-4.09483368139964
CD44		10057	960	CD44 molecule (Indian blood group)	0.282323523735824	8.43999217717327	2.2587976402308	0.0297121443636613	0.99842033550169	-3.88305415960331
PRAM1		3763	84106	PML-RARA regulated adaptor molecule 1	-0.515033777212901	4.4817326293905	-2.25838886393375	0.0297399268408389	0.99842033550169	-3.97514907734872
C9orf106		3145	414318	chromosome 9 open reading frame 106 (putative)	0.778438422558229	0.986724155266553	2.25812636249847	0.0297577799903204	0.99842033550169	-4.41825560575195
CARD8-AS1		1969	100505812	CARD8 antisense RNA 1	-0.264926768172554	5.51024709378655	-2.25786622023136	0.0297754821395889	0.99842033550169	-3.91464603229097
TG		11132	7038	thyroglobulin	0.555606013435642	3.26181278412012	2.25783701604194	0.0297774700125038	0.99842033550169	-4.13433631837992
TIGD3		2012	220359	tigger transposable element derived 3	-0.96078360442375	1.21819863157304	-2.25750226110717	0.0298002646105628	0.99842033550169	-4.39367449331193
GTF2H2C		6989	728340	GTF2H2 family member C	-0.432795044379851	2.45800069556465	-2.25275869494426	0.0301249505402287	0.99842033550169	-4.28251250685264
NEXN		4436	91624	nexilin F-actin binding protein	-0.711220128769104	4.22302320477539	-2.25014957085648	0.0303048830386326	0.99842033550169	-4.06240456044415
RFXAP		2306	5994	regulatory factor X associated protein	0.388704195168542	2.70201095669239	2.24551108469633	0.0306271374613855	0.99842033550169	-4.23082447933566
RNA5-8S5		1224	110255170	RNA, 5.8S ribosomal 5	-0.802740002990612	-0.740447084087306	-2.244401201508	0.0307046977252379	0.99842033550169	-4.44545005327423
PDE3A		8398	5139	phosphodiesterase 3A	-0.544615174077629	3.62090163162459	-2.24425025420097	0.030715259678099	0.99842033550169	-4.1345032764619
IKZF1		9784	10320	IKAROS family zinc finger 1	0.197349629679008	8.30043539362599	2.24381179765018	0.0307459573709015	0.99842033550169	-3.88968551691404
TMEM120B		8449	144404	transmembrane protein 120B	0.631914179361704	1.49032789940975	2.24363112922941	0.0307586144885139	0.99842033550169	-4.34572300932868
ITGB4		6761	3691	integrin subunit beta 4	1.56947723842754	0.476107846322995	2.24323720819292	0.0307862276072772	0.99842033550169	-4.45172656549802
ENTPD7		3657	57089	ectonucleoside triphosphate diphosphohydrolase 7	0.371937940556496	3.41600341099246	2.24217964542262	0.0308604702285834	0.99842033550169	-4.14068645363353
GZF1		5463	64412	GDNF inducible zinc finger protein 1	0.20667860115512	4.19959324083927	2.24131186804312	0.0309215089171284	0.99842033550169	-4.04229069121975
NELL2		6424	4753	neural EGFL like 2	1.03689640674315	5.96574417550747	2.23693199951502	0.0312312320990465	0.99842033550169	-3.89357828602151
SULF2		6657	55959	sulfatase 2	-0.363155161558013	7.74328989015837	-2.23553701618499	0.0313304580681158	0.99842033550169	-3.88061351574755
IGLV2-23		502	28813	immunoglobulin lambda variable 2-23	-1.24487247838885	2.08511279217783	-2.23550365050023	0.0313328348278691	0.99842033550169	-4.35675486917877
ITGA6		6533	3655	integrin subunit alpha 6	0.500760591881373	7.0197192044498	2.23516603158266	0.0313568937061778	0.99842033550169	-3.8803751366411
ITPKB-IT1		870	100506443	ITPKB intronic transcript 1	-0.394339088543468	2.62441529690825	-2.23475239503208	0.0313863920936889	0.99842033550169	-4.24637608365093
NCF1		3462	653361	neutrophil cytosolic factor 1	-0.505786717625642	5.51951291527599	-2.23354054869609	0.0314729571318327	0.99842033550169	-3.91432679193344
ZSWIM5		6046	57643	zinc finger SWIM-type containing 5	0.637197847394284	1.21639226276998	2.23270346290954	0.0315328764035734	0.99842033550169	-4.39577186071843
PSME1		1781	5720	proteasome activator subunit 1	-0.270810135599389	7.61212831206697	-2.22558836211122	0.0320463014412705	0.99842033550169	-3.88716718940178
PFDN4		1975	5203	prefoldin subunit 4	-0.323561712696009	3.30273556481592	-2.22466529567826	0.0321134528580092	0.99842033550169	-4.18092036542758
SLC17A5		3604	26503	solute carrier family 17 member 5	-0.20496534352227	4.27889316514931	-2.2243584230341	0.0321358050409776	0.99842033550169	-4.04552102765596
RBM5		10368	10181	RNA binding motif protein 5	-0.176334798889419	8.44108229457241	-2.22095044108872	0.032384971066409	0.99842033550169	-3.91027838363718
ZFYVE21		8390	79038	zinc finger FYVE-type containing 21	-0.278778458807008	3.78431388630272	-2.2208133361027	0.0323950310604091	0.99842033550169	-4.09038557096923
ST20-AS1		4223	283687	ST20 antisense RNA 1	-0.639095618961139	1.68759986664139	-2.21792685388733	0.0326074719954619	0.99842033550169	-4.37182057981827
TACSTD2		2351	4070	tumor associated calcium signal transducer 2	-1.91083655805454	-0.568202420996487	-2.21697991318367	0.0326774352010828	0.99842033550169	-4.5260154495663
CAMK1D		8762	57118	calcium/calmodulin dependent protein kinase ID	0.319470463345511	6.43599608591457	2.21536007784156	0.0327974240400444	0.99842033550169	-3.89356656994867
GNAZ		3840	2781	G protein subunit alpha z	-0.605148791896131	5.10771610221107	-2.21401963483342	0.0328970133627315	0.99842033550169	-3.96252697193477
ING4		2736	51147	inhibitor of growth family member 4	-0.206120183739357	4.88472403871991	-2.21360406054014	0.0329279434091471	0.99842033550169	-3.99332650769938
FUNDC1		1399	139341	FUN14 domain containing 1	-0.371260183777287	3.39454627568114	-2.2118285103666	0.0330603844106554	0.99842033550169	-4.16544353987595
IKBIP		4163	121457	IKBKB interacting protein	-0.384406190628745	5.92673437560255	-2.21182733793928	0.0330604720201818	0.99842033550169	-3.91246467425055
SPNS3		2684	201305	sphingolipid transporter 3 (putative)	0.870096310238798	0.992628461081091	2.21125792986888	0.0331030454090503	0.99842033550169	-4.32756053882352
CYP2R1		4516	120227	cytochrome P450 family 2 subfamily R member 1	0.275496123644394	3.635221936474	2.21054380671741	0.0331565077753956	0.99842033550169	-4.12574114076135
PTOV1-AS2		1023	101928378	PTOV1 antisense RNA 2	-0.936189192348494	0.35916542294415	-2.20953829403491	0.0332319150638633	0.99842033550169	-4.44844038610458
TATDN2		5572	9797	TatD DNase domain containing 2	0.310575658992843	4.33543469003509	2.20899112694705	0.0332730133107608	0.99842033550169	-4.02992138021121
GLA		2065	2717	galactosidase alpha	-0.437097917466967	4.30943472432947	-2.20618319512596	0.0334846319456949	0.99842033550169	-4.0638879298503
CLINT1		6368	9685	clathrin interactor 1	0.186955026974355	7.08334550598038	2.20539875615158	0.0335439643828968	0.99842033550169	-3.90382739086621
TRRAP		13218	8295	transformation/transcription domain associated protein	0.259244631883688	6.87730132221287	2.20539183791206	0.0335444880718897	0.99842033550169	-3.89599759941073
ZNF70		6924	7621	zinc finger protein 70	0.432769868045973	1.95095778019549	2.20490438767459	0.0335814048310309	0.99842033550169	-4.32269777898711
WDR73		9626	84942	WD repeat domain 73	-0.193932338700688	4.85626307439093	-2.20216305074146	0.0337896920323262	0.99842033550169	-3.99315541884166
DCAF4L1		4772	285429	DDB1 and CUL4 associated factor 4 like 1	0.588257589617962	1.57338114864262	2.19674698495792	0.0342045841530078	0.99842033550169	-4.38518065246952
MILR1		1816	284021	mast cell immunoglobulin like receptor 1	-0.672303952878223	4.42666855354621	-2.19532711844997	0.0343140977259144	0.99842033550169	-4.06511119141091
HIP1		8953	3092	huntingtin interacting protein 1	0.674181896985999	5.81100787431339	2.19317754377748	0.0344804860839403	0.99842033550169	-3.94287279685297
ARHGEF7		11768	8874	Rho guanine nucleotide exchange factor 7	0.243764027863531	5.27283133765197	2.19273668981891	0.0345146989143512	0.99842033550169	-3.95749558996319
SMARCA2		17300	6595	SWI/SNF related, matrix associated, actin dependent regulator of chromatin, subfamily a, member 2	0.144515556087679	7.99611097685766	2.1923446132644	0.0345451516612923	0.99842033550169	-3.92191848176522
CLUHP3		6235	100132341	clustered mitochondria homolog pseudogene 3	0.42952958696226	3.69238849290491	2.19193687762291	0.0345768459641171	0.99842033550169	-4.10475586156254
AACS		16094	65985	acetoacetyl-CoA synthetase	0.461320552962359	2.75930755106629	2.1914872939353	0.0346118231519736	0.99842033550169	-4.22657261180527
LSM8		6210	51691	LSM8 homolog, U6 small nuclear RNA associated	-0.177540562250983	5.71125742298754	-2.1893646561691	0.0347773870749375	0.99842033550169	-3.94774687893416
TK2		7169	7084	thymidine kinase 2	-0.32707320064574	4.91844633915937	-2.1857309013945	0.0350624494323329	0.99842033550169	-4.00607475584065
GDF11		8657	10220	growth differentiation factor 11	0.551278590105837	3.07524752563301	2.18363196124114	0.0352280511799813	0.99842033550169	-4.19661346503948
GTPBP10		10436	85865	GTP binding protein 10	0.238068371560211	5.24421392133286	2.18064212505651	0.0354651409614892	0.99842033550169	-3.98487217315338
UNC5CL		3136	222643	unc-5 family C-terminal like	0.74933222751259	0.41631949619416	2.18008036596813	0.0355098452844753	0.99842033550169	-4.46552182903725
PGM3		7335	5238	phosphoglucomutase 3	0.268108443326004	4.35959316210981	2.17979246251853	0.0355327757686786	0.99842033550169	-4.065644217555
MMP17		4003	4326	matrix metallopeptidase 17	-0.896087697057904	-0.72882472558957	-2.17874662599656	0.0356161834655192	0.99842033550169	-4.51016838590244
PANX1		2769	24145	pannexin 1	-0.357363453169553	4.50847687684147	-2.17873417229464	0.035617177720098	0.99842033550169	-4.0544848990638
FAS		3750	355	Fas cell surface death receptor	-0.40099211169135	6.90556850627393	-2.178592455768	0.0356284935440761	0.99842033550169	-3.92372963035984
KANSL1-AS1		976	644246	KANSL1 antisense RNA 1	1.12233675641258	1.47449149369468	2.17626617019491	0.035814699735765	0.99842033550169	-4.38870147671713
GLIPR1		6273	11010	GLI pathogenesis related 1	-0.298781583044249	8.69735136731556	-2.17585821616736	0.0358474429604689	0.99842033550169	-3.95156256551329
TMEM71		3332	137835	transmembrane protein 71	-0.293858882480386	7.92874159239143	-2.17543749683259	0.0358812385508314	0.99842033550169	-3.93119942318545
CCNB1		2558	891	cyclin B1	-0.56551807493662	3.09781449941147	-2.17494980385848	0.0359204493537445	0.99842033550169	-4.2214418657633
SATB1		13409	6304	SATB homeobox 1	0.324374181343357	6.82792574301243	2.17163850453596	0.0361876857257357	0.99842033550169	-3.9277715547392
RNU11		134	26824	RNA, U11 small nuclear	-0.584909941224898	1.14031457372696	-2.1687900285199	0.0364189783888192	0.99842033550169	-4.43197475872829
INTS8		7866	55656	integrator complex subunit 8	-0.146755964962792	6.88212155923649	-2.16657499383095	0.0365997406348672	0.99842033550169	-3.93232862668831
RNF144A		6473	9781	ring finger protein 144A	0.454388941686441	5.20342753393984	2.16478061054286	0.0367467569655097	0.99842033550169	-3.99370771312112
HSD17B11		2435	51170	hydroxysteroid 17-beta dehydrogenase 11	-0.261903160876446	8.08452996180362	-2.16369814490379	0.0368356975703772	0.99842033550169	-3.9432267558892
PTPN7		5906	5778	protein tyrosine phosphatase non-receptor type 7	0.342138109118749	4.09563296253105	2.16366001851169	0.0368388336910453	0.99842033550169	-4.08928817073628
CD9		3299	928	CD9 molecule	-0.460639667616838	5.11412267837318	-2.16268322277984	0.0369192615613868	0.99842033550169	-4.03468125116694
CRTC3		10814	64784	CREB regulated transcription coactivator 3	0.379883241556634	5.19527523406884	2.1586914094924	0.0372495594301812	0.99842033550169	-3.9918750201983
FAM227B		6020	196951	family with sequence similarity 227 member B	0.419257612163091	1.83115533219423	2.15680778673289	0.0374063237632977	0.99842033550169	-4.3713919006058
IGLV1-47		407	28822	immunoglobulin lambda variable 1-47	-1.100288217591	0.312624375086982	-2.15602985768647	0.037471236980644	0.99842033550169	-4.4921003503716
B3GAT1		11425	27087	beta-1,3-glucuronyltransferase 1	1.34458481019708	0.823645618904724	2.15400666216456	0.0376405266186786	0.99842033550169	-4.44122670257547
PSMB8		2006	5696	proteasome 20S subunit beta 8	-0.261543250102667	6.81060225611018	-2.15389104510847	0.0376502212080605	0.99842033550169	-3.94227299121973
IGLV3-19		377	28797	immunoglobulin lambda variable 3-19	-1.29332036439813	1.76714933342165	-2.15294519715495	0.0377296143470961	0.99842033550169	-4.3981050697172
CD1D		2253	912	CD1d molecule	-0.412814711595281	5.30245124959987	-2.15271046602405	0.0377493402650692	0.99842033550169	-3.99464571724489
MROH6		4408	642475	maestro heat like repeat family member 6	0.864403668668091	-0.0749658604303916	2.15175213449764	0.0378299694966133	0.99842033550169	-4.47522014132348
TBK1		4762	29110	TANK binding kinase 1	-0.223019770972347	6.55514888516762	-2.1507495202721	0.0379144874339699	0.99842033550169	-3.94986776794064
CACNG8		8747	59283	calcium voltage-gated channel auxiliary subunit gamma 8	1.04757886053297	0.864852490573926	2.14853045572881	0.0381021431332269	0.99842033550169	-4.41830970502671
EHHADH		4700	1962	enoyl-CoA hydratase and 3-hydroxyacyl CoA dehydrogenase	-0.576550171878208	1.35389090668142	-2.14827569537866	0.0381237394586768	0.99842033550169	-4.42096065549934
HSH2D		3398	84941	hematopoietic SH2 domain containing	-0.395993933579948	5.70844588752713	-2.14812506759647	0.0381365134373435	0.99842033550169	-3.96406153286664
ELAVL1		6956	1994	ELAV like RNA binding protein 1	0.274336193733832	4.37690664103539	2.14604327353867	0.0383134477323722	0.99842033550169	-4.07435622577688
CLTA		2515	1211	clathrin light chain A	-0.195539636565661	4.95709847758789	-2.14509871483653	0.0383939659562533	0.99842033550169	-4.03146705705972
ADARB2		10513	105	adenosine deaminase RNA specific B2 (inactive)	2.42119540414929	-0.265447891273147	2.1450429809009	0.0383987216240018	0.99842033550169	-4.50677903291354
PSMD4P1		1109	54035	proteasome 26S subunit, non-ATPase 4 pseudogene 1	-0.501288798255762	1.10145884858209	-2.1441684843082	0.038473408899877	0.99842033550169	-4.44715871065076
MNDA		2059	4332	myeloid cell nuclear differentiation antigen	-0.362822258814012	11.3751121381813	-2.14368703152635	0.038514582632422	0.99842033550169	-4.07905945987242
FTH1P12		551	2504	ferritin heavy chain 1 pseudogene 12	0.624437490038982	0.781427309045322	2.14198957341093	0.0386600596447933	0.99842033550169	-4.45304055951857
PLEKHO1		6565	51177	pleckstrin homology domain containing O1	-0.218652168916215	6.47836168271116	-2.14084956347439	0.0387580340380956	0.99842033550169	-3.95144162043955
DGKG		10978	1608	diacylglycerol kinase gamma	-0.370833789459069	4.30696040598772	-2.13948094896628	0.0388759447442233	0.99842033550169	-4.09097904349435
SDC4		2613	6385	syndecan 4	-0.607724664815563	1.30711299646629	-2.13936704768506	0.0388857719850635	0.99842033550169	-4.42590043433362
LONRF1		5685	91694	LON peptidase N-terminal domain and ring finger 1	-0.242556775875039	4.73022126591742	-2.13887084465526	0.0389286092802152	0.99842033550169	-4.06092460070209
ZNF701		6294	55762	zinc finger protein 701	-0.22550787586282	5.03739001190026	-2.13754879123838	0.0390429458844694	0.99842033550169	-4.0305707282469
NDFIP2		4831	54602	Nedd4 family interacting protein 2	0.474099902547636	1.96766271113704	2.13546986637413	0.0392233396276678	0.99842033550169	-4.35473185482608
LRRC63		2677	220416	leucine rich repeat containing 63	-0.799658297239744	0.977320551943747	-2.13256683208487	0.0394764745054377	0.99842033550169	-4.45434689293449
RNASEL		6125	6041	ribonuclease L	-0.255075603361878	6.91337470666308	-2.13235281622016	0.0394951929094803	0.99842033550169	-3.95769055481658
MTCO1P12		1543	107075141	MT-CO1 pseudogene 12	-0.41134998739394	3.48514164330114	-2.13218179057542	0.0395101569033043	0.99842033550169	-4.20899093166194
PRMT2		8031	3275	protein arginine methyltransferase 2	0.206991329283832	7.25705359798664	2.13023285176252	0.0396810341891559	0.99842033550169	-3.95932039293478
CRNKL1		4567	51340	crooked neck pre-mRNA splicing factor 1	-0.133335795942502	6.61118859135765	-2.12975463333847	0.0397230624872155	0.99842033550169	-3.96276285775057
IQGAP2		7904	10788	IQ motif containing GTPase activating protein 2	-0.272669929296066	8.67584183051623	-2.12946063744612	0.0397489198494992	0.99842033550169	-3.98697557790108
NFKB1		6257	4790	nuclear factor kappa B subunit 1	0.191162190027549	7.23306781012731	2.12848652024711	0.0398347010013071	0.99842033550169	-3.96148224889261
PPM1H		7063	57460	protein phosphatase, Mg2+/Mn2+ dependent 1H	-0.472100217103132	1.92215773477757	-2.12668729102382	0.0399935712932309	0.99842033550169	-4.36564271039417
GAPDHP40		1006	100131743	glyceraldehyde 3 phosphate dehydrogenase pseudogene 40	-1.41855421360463	-0.00848395446990851	-2.12640236318975	0.0400187813494548	0.99842033550169	-4.50466429880974
RAD54L2		11924	23132	RAD54 like 2	0.231407561362961	5.27422233378249	2.12115953714834	0.0404851678759051	0.99842033550169	-4.0128915767028
CPSF1		6072	29894	cleavage and polyadenylation specific factor 1	0.486689222197882	3.91799677649471	2.12067539159344	0.0405284767478737	0.99842033550169	-4.10231959103598
SMPD3		7166	55512	sphingomyelin phosphodiesterase 3	1.28416694581591	2.43021552407807	2.11758775513183	0.0408056407178092	0.99842033550169	-4.2764226861501
ZNF154		5713	7710	zinc finger protein 154	0.662529411729373	3.98792961061456	2.11455928176074	0.0410791148434191	0.99842033550169	-4.14302071139008
ZNF107		7162	51427	zinc finger protein 107	-0.36731512897324	6.53533988208491	-2.11330422061949	0.041192920401293	0.99842033550169	-3.97779087781718
CSRNP2		5230	81566	cysteine and serine rich nuclear protein 2	0.232599176780302	3.96597696141784	2.1118382285156	0.0413262041103325	0.99842033550169	-4.1319359891965
MIR3142HG		2301	107075116	MIR3142 host gene	0.500425046358146	1.43065039218542	2.1091870024282	0.0415682103757214	0.99842033550169	-4.397450412264
CRISPLD2		7965	83716	cysteine rich secretory protein LCCL domain containing 2	-0.571214922064659	7.71219909173675	-2.10574262086205	0.0418844791617238	0.99842033550169	-3.9810573970225
ACOT9		5046	23597	acyl-CoA thioesterase 9	-0.275912501636347	5.56296551156137	-2.1029552277427	0.0421419703116873	0.99842033550169	-4.01930031645331
PON2		3843	5445	paraoxonase 2	-0.40054328961515	2.57275872426748	-2.10243377457267	0.0421902949327739	0.99842033550169	-4.30636131484635
BTN3A1		5547	11119	butyrophilin subfamily 3 member A1	-0.277729162633943	8.11417005620169	-2.09981761138826	0.0424334789904739	0.99842033550169	-3.99462480382283
TPTEP1		9653	387590	TPTE pseudogene 1	-0.720879030300063	3.32429476912393	-2.09981681883767	0.0424335528479672	0.99842033550169	-4.21805211044437
SP4		6234	6671	Sp4 transcription factor	0.260644045684321	6.35999490052468	2.09947885584312	0.0424650577961907	0.99842033550169	-3.99087728777283
PPARA		13219	5465	peroxisome proliferator activated receptor alpha	0.33666056022765	3.87618010476934	2.099211035911	0.0424900386059794	0.99842033550169	-4.14963368934215
BEND2		4637	139105	BEN domain containing 2	-0.612377793910959	5.38758587609312	-2.09746160465515	0.0426535342791743	0.99842033550169	-4.04013769428208
SWI5		1649	375757	SWI5 homologous recombination repair protein	-0.368330039143526	1.81410958175829	-2.0974211267872	0.0426573237352804	0.99842033550169	-4.38038297347881
IGLV2-11		400	28816	immunoglobulin lambda variable 2-11	-1.00865097742014	1.46207008390238	-2.09513754127676	0.0428715882731667	0.99842033550169	-4.42401695008789
GALNT5		6818	11227	polypeptide N-acetylgalactosaminyltransferase 5	-0.731121279354995	3.24936224775597	-2.09437540573689	0.0429433082439974	0.99842033550169	-4.23530280472699
IFT140		8168	9742	intraflagellar transport 140	0.523177209016598	1.30741896507969	2.09288581549678	0.0430837890632363	0.99842033550169	-4.40365243952896
GXYLT1		7497	283464	glucoside xylosyltransferase 1	0.179452869119411	5.37416481265031	2.09084982334824	0.0432764532031936	0.99842033550169	-4.03736155526394
GORASP1		6256	64689	golgi reassembly stacking protein 1	-0.254896787444699	4.36640582715465	-2.09056801478161	0.0433031800409417	0.99842033550169	-4.11133158776707
DTX4		6072	23220	deltex E3 ubiquitin ligase 4	-0.510702114909053	2.36787954043873	-2.08756393270444	0.0435889906843112	0.99842033550169	-4.32726902653741
YWHAH		2453	7533	tyrosine 3-monooxygenase/tryptophan 5-monooxygenase activation protein eta	-0.356025216389023	4.44877253374151	-2.08388662945287	0.0439411059929706	0.99842033550169	-4.1286801572967
LRCH1		7307	23143	leucine rich repeats and calponin homology domain containing 1	0.292356807646598	4.69918632988184	2.08376169873801	0.0439531122966348	0.99842033550169	-4.0911427393914
CTSS		4228	1520	cathepsin S	-0.28565474992212	11.1715517055705	-2.08089346498016	0.0442295531883356	0.99842033550169	-4.11238745525449
SDR42E1		11911	93517	short chain dehydrogenase/reductase family 42E, member 1	0.51642994146736	2.80950454774933	2.08078550924407	0.0442399877077914	0.99842033550169	-4.2725335439479
ST13P6		1102	157530	ST13, Hsp70 interacting protein pseudogene 6	-0.44978903791254	3.70497640264362	-2.07731114735003	0.0445769593356412	0.99842033550169	-4.2062142166924
MCM3AP-AS1		7605	114044	MCM3AP antisense RNA 1	0.513214833309425	2.09752888662454	2.07705619198915	0.0446017753937789	0.99842033550169	-4.35759117362087
PNN		4201	5411	pinin, desmosome associated protein	-0.186052339258936	7.21552187061392	-2.07700799000503	0.0446064684914706	0.99842033550169	-4.00316122547121
CLEC7A		4190	64581	C-type lectin domain containing 7A	-0.290254930819268	8.86325676128571	-2.0757906526838	0.0447251359780605	0.99842033550169	-4.03098406603491
SENP2		7169	59343	SUMO specific peptidase 2	-0.172797412743247	5.89126240075278	-2.07380858502957	0.0449189426592702	0.99842033550169	-4.02496572512842
RNF41		6537	10193	ring finger protein 41	-0.146907781573239	5.79138609128588	-2.07141887367338	0.0451535874624649	0.99842033550169	-4.02994956839827
MBNL1-AS1		6585	401093	MBNL1 antisense RNA 1	-0.461811487385638	2.05985943723077	-2.07136882843195	0.0451585128486177	0.99842033550169	-4.38331493823089
ATP6V1G1		1305	9550	ATPase H+ transporting V1 subunit G1	-0.16516582243008	6.57511817053351	-2.071193027215	0.0451758187035607	0.99842033550169	-4.00922426862803
LONRF3		4041	79836	LON peptidase N-terminal domain and ring finger 3	0.539256023082185	3.19400199301026	2.07036799689945	0.0452571122805402	0.99842033550169	-4.25176467433276
USP30-AS1		656	100131733	USP30 antisense RNA 1	0.805274393755574	0.52749870740532	2.07025653780587	0.0452681046204357	0.99842033550169	-4.47849008415838
ARPC3P5		534	441131	actin related protein 2/3 complex subunit 3 pseudogene 5	-0.387706028636946	2.94226546685492	-2.06954741177106	0.0453380949965141	0.99842033550169	-4.30504834573033
CD3E		2844	916	CD3e molecule	0.469893670301814	4.09075227918264	2.0693227050095	0.0453602932155246	0.99842033550169	-4.14580951389177
RBM12		6702	10137	RNA binding motif protein 12	0.164404346109916	6.31539865873723	2.06815995536405	0.0454753105539029	0.99842033550169	-4.01424139116381
CBX5		15040	23468	chromobox 5	0.390738671528546	5.9326350756522	2.06753244821393	0.045537488658529	0.99842033550169	-4.0233580245192
DCTN5		12740	84516	dynactin subunit 5	0.206890826470187	5.87366514213374	2.06709949491301	0.0455804323231511	0.99842033550169	-4.02691149709681
SPTAN1		16226	6709	spectrin alpha, non-erythrocytic 1	0.395804802724427	7.56942969819495	2.06653797861313	0.0456361807046325	0.99842033550169	-4.01288069084946
RNF170		6112	81790	ring finger protein 170	-0.234560156808199	4.12497210196241	-2.06622969387662	0.0456668131772854	0.99842033550169	-4.15955072512145
ZNF273		8652	10793	zinc finger protein 273	-0.219918219550896	3.98295249536453	-2.06622410304929	0.0456673688717287	0.99842033550169	-4.17127543890771
GINM1		2248	116254	glycoprotein integral membrane 1	-0.214425505747295	4.77155634210919	-2.06442776244131	0.0458462212404206	0.99842033550169	-4.09321448084037
QRICH2		5775	84074	glutamine rich 2	0.515543848137636	1.70924923190996	2.06339262877902	0.0459495625170126	0.99842033550169	-4.38500330816105
VPS29		3211	51699	VPS29 retromer complex component	-0.170457356477616	6.42830501823	-2.0626803808252	0.0460207873128041	0.99842033550169	-4.02114901796404
RPS3P6		605	645000	ribosomal protein S3 pseudogene 6	-0.515328641455862	0.783366926540831	-2.06220099497401	0.0460687803094967	0.99842033550169	-4.468189160262
ZCCHC14		7390	23174	zinc finger CCHC-type containing 14	0.401367715949406	3.58962910033622	2.06100801633667	0.0461884038397737	0.99842033550169	-4.19358034969696
NUB1		5411	51667	negative regulator of ubiquitin like proteins 1	-0.259070251488436	6.59312455716797	-2.05925826801901	0.0463643482103801	0.99842033550169	-4.01879399819047
NMI		3480	9111	N-myc and STAT interactor	-0.320901389502879	7.16677791292731	-2.05873415723429	0.0464171637461037	0.99842033550169	-4.01543364842772
SYNJ2		9921	8871	synaptojanin 2	0.417428190144149	4.31082859792413	2.05790278431902	0.046501050620021	0.99842033550169	-4.13516365068437
PASK		10686	23178	PAS domain containing serine/threonine kinase	0.577742071436357	4.77592582422202	2.05578149629692	0.0467156933987552	0.99842033550169	-4.08672528144974
YWHAZP2		728	150554	tyrosine 3-monooxygenase/tryptophan 5-monooxygenase activation protein zeta pseudogene 2	-0.286215503902131	4.93186691470953	-2.05539686303442	0.0467547052609809	0.99842033550169	-4.09884188730531
FOXO1		6232	2308	forkhead box O1	0.301440718854132	6.64509824724863	2.0529985597972	0.0469985993656474	0.99842033550169	-4.02439916451504
MED4		2358	29079	mediator complex subunit 4	-0.137550461036063	5.44945644120233	-2.05212494806048	0.0470877169158667	0.99842033550169	-4.06221393516786
ZNF844		6620	284391	zinc finger protein 844	-0.319496360547141	4.65081930630017	-2.05166089722133	0.0471351150342238	0.99842033550169	-4.11083835662835
CASP8		7243	841	caspase 8	-0.197144554100246	8.39086985386973	-2.05002541404338	0.0473024959533304	0.99842033550169	-4.03852778478511
NT5C3AP1		1663	90859	5'-nucleotidase, cytosolic IIIA pseudogene 1	-0.398465833614976	4.33878415085855	-2.04889162287942	0.0474188367941388	0.99842033550169	-4.15161881645362
ACVR2A		6770	92	activin A receptor type 2A	-0.273897415577828	4.44995295270313	-2.04791019375467	0.0475197453252179	0.99842033550169	-4.13897062132097
PCGF7P		1051	253272	polycomb group ring finger 7 pseudogene	-0.546196589169177	0.945379314696929	-2.04724679097707	0.0475880613120647	0.99842033550169	-4.47086676360509
OLFM1		6123	10439	olfactomedin 1	1.23460294494874	-0.486818352058833	2.0466988313983	0.0476445538902567	0.99842033550169	-4.50512279994005
CPA3		1848	1359	carboxypeptidase A3	0.677556646456906	2.7776918266847	2.04653237065034	0.0476617269721589	0.99842033550169	-4.31096140035786
SNORA11B		129	100124539	small nucleolar RNA, H/ACA box 11B	-0.563615965379084	0.843301017964067	-2.04628935228379	0.0476868079074016	0.99842033550169	-4.46432056601889
RUFY4		4357	285180	RUN and FYVE domain containing 4	-0.683436653698319	0.865207001832114	-2.04611794435435	0.0477045051573144	0.99842033550169	-4.46876441042494
ZMAT3		9646	64393	zinc finger matrin-type 3	0.224293361225561	5.89857281923837	2.04596513821899	0.0477202866778547	0.99842033550169	-4.04339544536842
ZNF587		7350	84914	zinc finger protein 587	-0.205545950655297	5.84172947485471	-2.04538444367855	0.0477803013008625	0.99842033550169	-4.04054102276435
SKP2		3837	6502	S-phase kinase associated protein 2	0.309073257836976	4.12767997294369	2.04514833795769	0.0478047216162372	0.99842033550169	-4.15905192471204
SERPINB10		2700	5273	serpin family B member 10	-1.29594156449759	0.818659828471427	-2.04494820245926	0.0478254300862017	0.99842033550169	-4.48582923015012
UBE2L3		3838	7332	ubiquitin conjugating enzyme E2 L3	-0.184553072573989	5.06450427170725	-2.04451535286025	0.0478702448177749	0.99842033550169	-4.09718077774934
CDCA2		3908	157313	cell division cycle associated 2	-0.696448642260722	1.59745347534277	-2.04044285766315	0.0482936869265664	0.99842033550169	-4.42648092674665
RGPD5		14175	84220	RANBP2 like and GRIP domain containing 5	0.354982722617273	2.40624074514413	2.0377256153667	0.0485780312427032	0.99842033550169	-4.34217373358405
CNTNAP3		9521	79937	contactin associated protein like 3	-0.641357538144617	5.31246135920071	-2.03734130965617	0.0486183644519018	0.99842033550169	-4.06226807066308
GRB14		2958	2888	growth factor receptor bound protein 14	-0.823177189763689	1.14784547824979	-2.0372487173156	0.048628086465488	0.99842033550169	-4.45458437422386
C2orf68		4413	388969	chromosome 2 open reading frame 68	-0.176013117945699	5.73963233739344	-2.03455429567275	0.0489117396326979	0.99842033550169	-4.05579814337607
IGLV3-1		398	28809	immunoglobulin lambda variable 3-1	-1.23448702990375	1.66557589474435	-2.03409619998127	0.0489601086539073	0.99842033550169	-4.4351252503403
LRRC70		2249	100130733	leucine rich repeat containing 70	0.631876454189521	0.5836266211963	2.03401023720917	0.0489691898683465	0.99842033550169	-4.48626965178964
RAB11FIP5		7058	26056	RAB11 family interacting protein 5	0.630285423474698	1.14909263605774	2.03093806476675	0.0492947043470386	0.99842033550169	-4.41585109567127
TSC22D2		11676	9819	TSC22 domain family member 2	0.200369003675729	4.93736805948167	2.02951949575757	0.0494456458897706	0.99842033550169	-4.10185999137245
ZNF550		5087	162972	zinc finger protein 550	0.423384372316847	3.91490663199018	2.02524139829374	0.0499032963695618	0.99842033550169	-4.19359556488266
CXorf21		1855	80231	chromosome X open reading frame 21	-0.278381746906152	5.49182979058334	-2.02292014743955	0.0501531546659836	0.99842033550169	-4.08606588016121
AXIN2		5226	8313	axin 2	0.733290840123664	1.92021483109199	2.02273677801982	0.0501729388434395	0.99842033550169	-4.37553868946402
ALDH6A1		6680	4329	aldehyde dehydrogenase 6 family member A1	0.354848821526629	3.96952845648695	2.02033338921311	0.0504328757663492	0.99842033550169	-4.18716422643137
TEX261		4260	113419	testis expressed 261	0.271800527223457	3.4905848724796	2.02033244012311	0.0504329786458615	0.99842033550169	-4.22605241186575
RNASEH1		2865	246243	ribonuclease H1	-0.299804436946126	2.68551239456971	-2.01965289999138	0.0505066864214468	0.99842033550169	-4.3178661811099
PRDX4		1904	10549	peroxiredoxin 4	-0.338394711712643	2.68713680119491	-2.01780082824975	0.0507080519442836	0.99842033550169	-4.32850172722204
LCA5		5964	167691	lebercilin LCA5	-0.718899382073587	1.33927048110274	-2.01726625816434	0.0507663026740646	0.99842033550169	-4.44880824433953
UBR2		8840	23304	ubiquitin protein ligase E3 component n-recognin 2	-0.207948553037413	9.5169684317571	-2.01614919666479	0.0508882141391566	0.99842033550169	-4.0953099890373
HERC2		20027	8924	HECT and RLD domain containing E3 ubiquitin protein ligase 2	0.264797731851512	5.48912795385403	2.01149039179662	0.0513994093097433	0.99842033550169	-4.0768597131045
SNORD3B-2		791	780852	small nucleolar RNA, C/D box 3B-2	0.722465783236778	0.344996391396568	2.01132741412019	0.0514173729265979	0.99842033550169	-4.46908385586804
GCC1		4987	79571	GRIP and coiled-coil domain containing 1	-0.17898952297013	5.6412206328245	-2.00987593902578	0.0515775975834677	0.99842033550169	-4.07526862252893
CATSPER1		2687	117144	cation channel sperm associated 1	-0.653106865427629	1.219425823513	-2.00767516203966	0.051821364429437	0.99842033550169	-4.45223871556208
RCHY1		6565	25898	ring finger and CHY zinc finger domain containing 1	0.178044276340513	5.16659255776593	2.00686395706335	0.0519114691742878	0.99842033550169	-4.11014104238728
SMG1P6		2930	100422558	SMG1 pseudogene 6	0.476605526177551	1.12683590690567	2.00629202248148	0.0519750787899455	0.99842033550169	-4.44973732969753
SNORA22		540	677807	small nucleolar RNA, H/ACA box 22	-0.650170531298095	1.3798467637688	-2.00324025308837	0.052315638560979	0.99842033550169	-4.44956611112624
TOPORS		4098	10210	TOP1 binding arginine/serine rich protein	-0.235894589385833	7.19368454062521	-2.00305195256148	0.0523367152073707	0.99842033550169	-4.05830288616682
ZNF460		3505	10794	zinc finger protein 460	0.203896567111135	6.21340985423773	2.00284709508593	0.0523596534713	0.99842033550169	-4.06380165824894
CMTM2		1151	146225	CKLF like MARVEL transmembrane domain containing 2	-0.455616144659644	5.80681745267517	-2.00263784001111	0.0523830931648943	0.99842033550169	-4.08359741419146
ADNP2		5893	22850	ADNP homeobox 2	0.224914188550896	4.18847704333626	2.00238315545729	0.0524116339451789	0.99842033550169	-4.17658537679311
RCAN3		7077	11123	RCAN family member 3	0.641573431165752	6.30545355683009	2.00010542173806	0.0526674857743388	0.99842033550169	-4.06680393903947
KNSTRN		3654	90417	kinetochore localized astrin (SPAG5) binding protein	-0.407600232105553	3.98703286421908	-1.99960077497092	0.0527243180701569	0.99842033550169	-4.2084794632278
OIP5-AS1		12673	729082	OIP5 antisense RNA 1	0.162177102077271	8.0387657047883	1.99900616552466	0.052791350160618	0.99842033550169	-4.07051259186984
DIXDC1		8509	85458	DIX domain containing 1	0.835388283412556	1.41967824308955	1.99832679359894	0.0528680284014175	0.99842033550169	-4.43374301980523
DNAH6		13514	1768	dynein axonemal heavy chain 6	0.91045677228517	1.31458313475622	1.99740979581065	0.0529716800485902	0.99842033550169	-4.4410544704152
DAPP1		4548	27071	dual adaptor of phosphotyrosine and 3-phosphoinositides 1	-0.241967990908226	8.09493646441055	-1.99633108909013	0.0530938361942744	0.99842033550169	-4.07114645320852
HEATR5A		10243	25938	HEAT repeat containing 5A	-0.260369555689066	5.16810746244857	-1.99577859054987	0.0531564975728322	0.99842033550169	-4.11135599426697
ASB2		5040	51676	ankyrin repeat and SOCS box containing 2	0.857430232268163	0.365261005139464	1.99524455525959	0.0532171259874833	0.99842033550169	-4.48471109850837
CHEK1		6558	1111	checkpoint kinase 1	-0.378111164618262	1.97141450846958	-1.99259798355149	0.0535184753138993	0.99842033550169	-4.4080330704598
HIVEP2		9774	3097	HIVEP zinc finger 2	0.325694511047893	7.18261208062382	1.99069024701722	0.0537366157376422	0.99842033550169	-4.06772583935009
TMED3		19470	23423	transmembrane p24 trafficking protein 3	0.255744907486578	4.249093730461	1.99044074955041	0.0537652015533088	0.99842033550169	-4.18029733402478
TBC1D30		8648	23329	TBC1 domain family member 30	-0.415044678298806	2.65844333113612	-1.98828252093079	0.0540130288793871	0.99842033550169	-4.34590875485807
SLC35D2		2203	11046	solute carrier family 35 member D2	-0.224941967784089	4.56377187233386	-1.98786277889655	0.0540613424257895	0.99842033550169	-4.17030362992377
WDYHV1		2132	55093	WDYHV motif containing 1	0.529741325883723	1.32207434315069	1.98775808881738	0.0540733984036464	0.99842033550169	-4.44247772726271
LINC01232		6199	102725509	long intergenic non-protein coding RNA 1232	-0.399783728836575	2.68595440540969	-1.98575904794585	0.0543040533795736	0.99842033550169	-4.33415336198643
STXBP1		9408	6812	syntaxin binding protein 1	0.672334781421378	0.851795267082084	1.98426479190518	0.0544770218134344	0.99842033550169	-4.47403476630985
USP15		19418	9958	ubiquitin specific peptidase 15	-0.291233047575405	10.4005941795179	-1.98365277686344	0.0545480037659925	0.99842033550169	-4.14354928367007
MACF1		43102	23499	microtubule actin crosslinking factor 1	0.209237414636522	10.3597430946845	1.98322716843913	0.0545974134131391	0.99842033550169	-4.14797682360985
LINC00944		1853	387895	long intergenic non-protein coding RNA 944	0.815661801894617	1.82855871893308	1.98318867209863	0.05460188443589	0.99842033550169	-4.39763471219887
BLOC1S2		2943	282991	biogenesis of lysosomal organelles complex 1 subunit 2	-0.23655162853558	5.55495683855183	-1.9828726729045	0.0546385970576151	0.99842033550169	-4.10511950727685
ADAMTS17		8242	170691	ADAM metallopeptidase with thrombospondin type 1 motif 17	0.724418877678701	1.09121749177326	1.98283161091775	0.0546433691888935	0.99842033550169	-4.44266894334837
ITGAE		6657	3682	integrin subunit alpha E	-0.253429414696623	2.93695892654228	-1.98232993650877	0.054701701842203	0.99842033550169	-4.30589132026604
ZNF763		2845	284390	zinc finger protein 763	-0.376462013396381	2.56624867590731	-1.98188722975636	0.0547532228158814	0.99842033550169	-4.34929467678848
ACSBG1		8230	23205	acyl-CoA synthetase bubblegum family member 1	-0.808740035325531	1.05376617623599	-1.9818443777174	0.054758212048919	0.99842033550169	-4.47182271341766
GLG1		14111	2734	golgi glycoprotein 1	0.18557567245931	8.0527691186854	1.97926330532034	0.0550594522625169	0.99842033550169	-4.08521292431391
STS		6521	412	steroid sulfatase	-0.493361879518625	3.9893119094372	-1.97744113624778	0.0552729839152552	0.99842033550169	-4.22961434183765
BRCA1		8922	672	BRCA1 DNA repair associated	-0.290457839757922	5.65932256194527	-1.9773487645061	0.0552838276216731	0.99842033550169	-4.10773725701696
NIPAL3		9404	57185	NIPA like domain containing 3	0.358442865742617	5.89170780269723	1.97530271590248	0.0555244904803993	0.99842033550169	-4.09172569527584
HNRNPCP3		875	646956	heterogeneous nuclear ribonucleoprotein C pseudogene 3	-0.390688629468189	1.29179698406917	-1.97476146091242	0.0555883062468033	0.99842033550169	-4.4459567990818
HNRNPA1P70		1087	341333	heterogeneous nuclear ribonucleoprotein A1 pseudogene 70	1.01146608271242	0.648493453196322	1.97246912331669	0.0558592853105788	0.99842033550169	-4.48345921888177
KCNC4		25042	3749	potassium voltage-gated channel subfamily C member 4	0.483544212117037	1.73631415150797	1.97114235473297	0.0560166457470652	0.99842033550169	-4.39963366877211
DCTN6		1984	10671	dynactin subunit 6	-0.220142199792673	3.76073244590757	-1.97037288254128	0.0561080841808735	0.99842033550169	-4.2523840333398
TCAF2		6466	285966	TRPM8 channel associated factor 2	0.477674213989439	1.79992240583307	1.96919511509425	0.0562482916828726	0.99842033550169	-4.41807074613352
LINC00467		4448	84791	long intergenic non-protein coding RNA 467	-0.366283553231864	1.60559714991541	-1.9690471319585	0.0562659297866277	0.99842033550169	-4.43968308253342
NMRK1		3865	54981	nicotinamide riboside kinase 1	0.235069390361183	4.80075229355492	1.96884561427168	0.0562899563698086	0.99842033550169	-4.15151473306799
B4GALT6		5306	9331	beta-1,4-galactosyltransferase 6	-0.391248155989562	1.98483831501581	-1.96696144776511	0.0565150320816924	0.99842033550169	-4.4119635528926
FLT3		4159	2322	fms related tyrosine kinase 3	-0.925307800050941	3.59055524699742	-1.96668509488466	0.0565481096018759	0.99842033550169	-4.27523547134156
PLXDC2		12567	84898	plexin domain containing 2	-0.325520027024325	8.31512649101296	-1.96478811936069	0.0567756168864773	0.99842033550169	-4.09887151140221
TAS2R63P		925	338413	taste 2 receptor member 63 pseudogene	0.591966764469645	1.02818651042418	1.96443005471072	0.0568186488755208	0.99842033550169	-4.45400804441425
ADAMTS1		7063	9510	ADAM metallopeptidase with thrombospondin type 1 motif 1	-0.66067730989321	1.79767284191062	-1.96290356074962	0.057002418660082	0.99842033550169	-4.41998660740923
CAMK4		13910	814	calcium/calmodulin dependent protein kinase IV	0.548359359652924	6.94136333478203	1.96181389989418	0.0571339137412001	0.99842033550169	-4.0890332347594
CCND2		7157	894	cyclin D2	0.389849910113046	6.60142351371845	1.95994023370619	0.0573606322116854	0.99842033550169	-4.0904049608417
HCG27		2354	253018	HLA complex group 27	-0.357436274142493	7.01899308026184	-1.95899904659214	0.0574748115011601	0.99842033550169	-4.08967743974079
RPS6KA5		27726	9252	ribosomal protein S6 kinase A5	-0.289175451516375	7.14624993070095	-1.95727732060776	0.057684189676755	0.99842033550169	-4.09042451919456
TNFRSF17		1118	608	TNF receptor superfamily member 17	-1.11904476700679	0.903705124889245	-1.95707368691654	0.0577089970035124	0.99842033550169	-4.48127382437651
SYTL3		2896	94120	synaptotagmin like 3	-0.315611095931635	5.48704523820438	-1.95682103912945	0.0577397882045753	0.99842033550169	-4.12079993841248
C4BPA		2441	722	complement component 4 binding protein alpha	-2.13976186183102	1.15069145752759	-1.95652562034321	0.0577758100853174	0.99842033550169	-4.47643245339917
GNAI1		4547	2770	G protein subunit alpha i1	-0.736762726893918	0.797700745856713	-1.9563542451761	0.057796715610688	0.99842033550169	-4.49100548895226
ATL1		4360	51062	atlastin GTPase 1	-0.459736136266749	2.04313053871263	-1.95570219397565	0.0578763170779358	0.99842033550169	-4.40052134472032
SNRPB		1278	6628	small nuclear ribonucleoprotein polypeptides B and B1	0.290916289590172	4.01399949690063	1.95427703731311	0.0580506279971172	0.99842033550169	-4.20965427306067
HSPH1		8390	10808	heat shock protein family H (Hsp110) member 1	0.312925892818388	5.96304681578472	1.95328346623841	0.058172419839308	0.99842033550169	-4.10879254644655
IFIT2		4101	3433	interferon induced protein with tetratricopeptide repeats 2	-0.572999239471589	9.16683087165642	-1.95279758701658	0.0582320591855601	0.99842033550169	-4.12393148055995
BTNL8		3924	79908	butyrophilin like 8	-0.664069065101698	4.69783162025002	-1.95161447189504	0.0583775018092348	0.99842033550169	-4.18159141981165
HRAT92		3506	441307	heart tissue-associated transcript 92	-0.546591849989956	1.91665835290286	-1.95120355865264	0.0584280895174915	0.99842033550169	-4.40574916423013
PLK4		4482	10733	polo like kinase 4	-0.361870053279174	2.69988427593794	-1.95120229661488	0.0584282449458066	0.99842033550169	-4.35805482712305
HOOK1		6758	51361	hook microtubule tethering protein 1	0.522506109324916	3.76420257638334	1.94978492827331	0.0586030287812304	0.99842033550169	-4.25162306563057
MAGEF1		1636	64110	MAGE family member F1	0.393745516093871	2.72591816675466	1.94832656901235	0.0587833384731724	0.99842033550169	-4.33417748116259
RASA3		4763	22821	RAS p21 protein activator 3	0.280418383063612	6.74226295031465	1.94803344168955	0.0588196381127441	0.99842033550169	-4.09608235641705
PGM5		7426	5239	phosphoglucomutase 5	-1.19568055671697	1.70304019990882	-1.94784814697411	0.0588425942016805	0.99842033550169	-4.43523104241696
USF1		2336	7391	upstream transcription factor 1	-0.211695103084701	6.86302277165206	-1.94656590122456	0.0590016631454693	0.99842033550169	-4.09926827304588
IGKV3D-20		445	28874	immunoglobulin kappa variable 3D-20	-1.07033773259669	0.833381160522007	-1.94599050371736	0.0590731646104105	0.99842033550169	-4.47755007873237
ITGA10		6320	8515	integrin subunit alpha 10	0.46331813110843	1.21746984688275	1.94516178793729	0.0591762759342047	0.99842033550169	-4.4554091454298
SPATA5L1		3406	79029	spermatogenesis associated 5 like 1	-0.261803460355741	3.81791285548259	-1.94477880783635	0.0592239799228144	0.99842033550169	-4.24350742591236
LRRC29		2807	26231	leucine rich repeat containing 29	-0.649936644014837	0.0345142417829172	-1.94390476654069	0.0593329747683575	0.99842033550169	-4.51273866684914
EIF5A		2815	1984	eukaryotic translation initiation factor 5A	0.272634809461776	4.73012317218174	1.94308661173407	0.0594351572198571	0.99842033550169	-4.16206298323512
HEG1		9925	57493	heart development protein with EGF like domains 1	0.488653815687575	4.38292464216311	1.94148804871749	0.0596352459370208	0.99842033550169	-4.1942353949334
LINC01146		2807	283587	long intergenic non-protein coding RNA 1146	0.396980412012306	1.68495570869892	1.94134988638256	0.0596525666659942	0.99842033550169	-4.42771484041179
TMEM150B		1713	284417	transmembrane protein 150B	-0.535115748328975	0.831113181583824	-1.94082147516651	0.0597188510029341	0.99842033550169	-4.4777266853818
USP33		6918	23032	ubiquitin specific peptidase 33	-0.175994335671525	7.74761885476196	-1.94072101261107	0.0597314602919612	0.99842033550169	-4.10739478602836
SYF2		3370	25949	SYF2 pre-mRNA splicing factor	-0.165067145093765	6.77051603826488	-1.93956244120096	0.0598770412784566	0.99842033550169	-4.11045812415676
MCM6		4118	4175	minichromosome maintenance complex component 6	0.261014921313753	4.50555831623867	1.93657466908872	0.0602538841097404	0.99842033550169	-4.19744321483395
MMRN1		5510	22915	multimerin 1	-0.650481929949245	5.52912324437864	-1.93549639254071	0.060390386489741	0.99842033550169	-4.1468530497774
TBC1D8B		9503	54885	TBC1 domain family member 8B	-0.521679933967794	0.99173944406842	-1.93142330230676	0.0609084188459213	0.99842033550169	-4.48336207276223
MTA3		10580	57504	metastasis associated 1 family member 3	0.390859816945794	3.46705285567417	1.93082747879761	0.0609845181282763	0.99842033550169	-4.27677045979916
CFL2		7179	1073	cofilin 2	0.411453726359507	2.54762704100501	1.93050911081375	0.0610252140198945	0.99842033550169	-4.36081430597379
LMO7		14367	4008	LIM domain 7	0.485599349986794	3.63643034603029	1.9304215897775	0.061036405632552	0.99842033550169	-4.2696727920919
ZNF100		6612	163227	zinc finger protein 100	-0.327315472212082	5.25382916874792	-1.93033251622421	0.0610477975856798	0.99842033550169	-4.15661283449775
SPATA7		6872	55812	spermatogenesis associated 7	-0.520427419855947	2.61670133426076	-1.9302839026108	0.0610540157366324	0.99842033550169	-4.36402664797716
GNG11		3055	2791	G protein subunit gamma 11	-0.431633367756417	5.96919035322387	-1.93013589304761	0.0610729509485559	0.99842033550169	-4.12569432639817
CALD1		9843	800	caldesmon 1	-0.620398831978653	3.38659531813122	-1.92945079294727	0.0611606633114436	0.99842033550169	-4.30547669906709
ACTR10		4039	55860	actin related protein 10	-0.191324668572068	5.68442894987506	-1.92738436258645	0.0614258826637317	0.99842033550169	-4.13956475105704
MASTL		3631	84930	microtubule associated serine/threonine kinase like	-0.374910659556816	4.7609868249246	-1.92735450464093	0.061429722075026	0.99842033550169	-4.18839885380469
SLC16A6		4061	9120	solute carrier family 16 member 6	-0.273204403151206	5.34450101856245	-1.9273443921618	0.0614310224781235	0.99842033550169	-4.15441128815991
ARNTL		6726	406	aryl hydrocarbon receptor nuclear translocator like	-0.188645443233227	6.48881593381557	-1.92632728843988	0.0615619369189356	0.99842033550169	-4.11690895152592
NUP188		8041	23511	nucleoporin 188	0.304293912389663	4.93547044437222	1.92528255520109	0.0616966575700826	0.99842033550169	-4.16549800433963
SLC6A4		6983	6532	solute carrier family 6 member 4	-0.760386109668054	1.45091318428249	-1.92516275230862	0.0617121226206713	0.99842033550169	-4.46242154014979
TTC3P1		6081	286495	tetratricopeptide repeat domain 3 pseudogene 1	0.314091283504365	4.8337822644424	1.9246757884209	0.0617750178935403	0.99842033550169	-4.17992004435211
CEP72		3658	55722	centrosomal protein 72	0.809846591372211	1.63758114842505	1.92402881281277	0.0618586652777476	0.99842033550169	-4.42927043134259
FAM120AOS		3717	158293	family with sequence similarity 120A opposite strand	-0.22717419605735	5.35807489190756	-1.92367886986746	0.0619039499514097	0.99842033550169	-4.15293242452641
ARHGAP42		6944	143872	Rho GTPase activating protein 42	-0.68653790431964	3.11847413462868	-1.923178893541	0.0619686993137164	0.99842033550169	-4.32475778528308
HACD1		3857	9200	3-hydroxyacyl-CoA dehydratase 1	-0.729493623503034	1.28629667669686	-1.92304579236635	0.061985946379725	0.99842033550169	-4.46431603778587
BIN2		4010	51411	bridging integrator 2	-0.237398259370067	8.44083633395778	-1.92283287816362	0.0620135440942432	0.99842033550169	-4.13142875745297
ATP6V1E1		3212	529	ATPase H+ transporting V1 subunit E1	-0.164043166489009	6.02829562088424	-1.92255033944042	0.062050182786299	0.99842033550169	-4.13086886300541
HLA-B		3012	3106	major histocompatibility complex, class I, B	-0.297454038008444	11.1129938117974	-1.92166589997214	0.0621649943959723	0.99842033550169	-4.20868396166286
NMT2		4700	9397	N-myristoyltransferase 2	0.433772633701909	4.3335641684086	1.92026968992472	0.0623466123215857	0.99842033550169	-4.20877484684953
BCL2		11765	596	BCL2 apoptosis regulator	0.494236792612303	7.33753539328667	1.91825232170692	0.0626098359277839	0.99842033550169	-4.12300764589043
MSH2		4552	4436	mutS homolog 2	0.285071836028285	4.72538874344166	1.91824593657987	0.0626106705655179	0.99842033550169	-4.18920110545392
MGST2		3182	4258	microsomal glutathione S-transferase 2	-0.367246063755534	2.82827290944256	-1.91764364580292	0.0626894425770398	0.99842033550169	-4.35291065641562
GANAB		5027	23193	glucosidase II alpha subunit	0.243968010445474	6.15153849695787	1.91740354994965	0.0627208678199078	0.99842033550169	-4.12924005396224
ATP6AP1L		7185	92270	ATPase H+ transporting accessory protein 1 like	0.586324211855681	1.13935748250095	1.91491292932202	0.0630476554242247	0.99842033550169	-4.4598131532627
CBX6		8030	23466	chromobox 6	0.285356505813864	4.39720955773685	1.91467207835052	0.0630793342833431	0.99842033550169	-4.1939241124058
TMEM245		9484	23731	transmembrane protein 245	0.203900078944002	6.43644710463568	1.91273789907434	0.0633342310623047	0.99842033550169	-4.13056581016525
DUSP19		5376	142679	dual specificity phosphatase 19	-0.380831080468452	2.05321818747724	-1.91247969008463	0.0633683261255485	0.99842033550169	-4.4165167784183
ATP10A		8409	57194	ATPase phospholipid transporting 10A (putative)	0.381928755641743	4.55852547288371	1.91171021437279	0.0634700246468533	0.99842033550169	-4.19377391128882
FAM228B		4916	375190	family with sequence similarity 228 member B	-0.27453736891044	4.71558546188032	-1.91034043790165	0.063651409460935	0.99842033550169	-4.2016731120394
PANK2		6698	80025	pantothenate kinase 2	-0.160923705605903	6.48576495100109	-1.90980095170397	0.0637229699371657	0.99842033550169	-4.12895051197514
KIAA1841		7992	84542	KIAA1841	-0.26481766901982	3.85848971826888	-1.90943887009532	0.0637710372105944	0.99842033550169	-4.26414835881243
OPLAH		4452	26873	5-oxoprolinase, ATP-hydrolysing	1.22536451994219	1.52557420380482	1.90892636571467	0.0638391267207879	0.99842033550169	-4.40186336698877
SMPD1		2750	6609	sphingomyelin phosphodiesterase 1	0.326373420695605	2.42568091654385	1.90872794644574	0.0638655047574167	0.99842033550169	-4.36888814507292
FKBP4		5180	2288	FKBP prolyl isomerase 4	0.275448739348012	3.77978081913645	1.90841899748795	0.0639065953410222	0.99842033550169	-4.26318973352969
UBE3C		9220	9690	ubiquitin protein ligase E3C	0.105697068588872	6.71710683840313	1.90662981423544	0.0641450055021529	0.99842033550169	-4.1292160213041
CEP170P1		4587	645455	centrosomal protein 170 pseudogene 1	-0.387153323985752	1.97746518853953	-1.90612987923979	0.0642117585757079	0.99842033550169	-4.42881090203716
CAMSAP1		8642	157922	calmodulin regulated spectrin associated protein 1	0.210084085193861	4.84613445497354	1.90514278541796	0.0643437339061576	0.99842033550169	-4.18498964453808
KPNA3		4474	3839	karyopherin subunit alpha 3	0.225484936449809	5.20342027152854	1.90367764400935	0.0645400538022932	0.99842033550169	-4.1756838687187
SAMD9		6855	54809	sterile alpha motif domain containing 9	-0.264178571084233	9.17735790357532	-1.90355483484581	0.0645565327932623	0.99842033550169	-4.16016566506229
TTC3		15883	7267	tetratricopeptide repeat domain 3	0.302565163468119	7.17226060967941	1.9029456995275	0.0646383222113896	0.99842033550169	-4.13282181937992
SLC12A2		10664	6558	solute carrier family 12 member 2	0.220293161883835	4.48523498513866	1.90193496320661	0.0647742312838857	0.99842033550169	-4.21590052350019
GATA3		3253	2625	GATA binding protein 3	0.667038953278912	1.74061354462464	1.89892559089884	0.0651803401478852	0.99842033550169	-4.43130728266756
ARPC3		3025	10094	actin related protein 2/3 complex subunit 3	-0.232719346796682	7.35419336193714	-1.89887536346016	0.0651871367245694	0.99842033550169	-4.13542434551561
LYSMD3		4459	116068	LysM domain containing 3	-0.143525088539531	6.44713238017689	-1.89868542535728	0.0652128438855056	0.99842033550169	-4.14180055265664
CCR7		2508	1236	C-C motif chemokine receptor 7	0.734162126849689	6.20004059302413	1.89821177809143	0.0652769875149145	0.99842033550169	-4.14441661988743
YPEL5		3421	51646	yippee like 5	-0.215448133742925	7.80947623805358	-1.89669761457936	0.0654824059423902	0.99842033550169	-4.14024915576668
EFCAB2		8607	84288	EF-hand calcium binding domain 2	-0.60767559239989	3.2628877563271	-1.89613180403194	0.0655593085153156	0.99842033550169	-4.33377959431564
GNB4		7035	59345	G protein subunit beta 4	-0.274375125131717	7.32894944848451	-1.89466464160829	0.0657590797226828	0.99842033550169	-4.13899119215929
BCL11B		7855	64919	BAF chromatin remodeling complex subunit BCL11B	0.466871380653673	6.93085517765152	1.89385438172402	0.0658696294592372	0.99842033550169	-4.1380070428852
C11orf54		6269	28970	chromosome 11 open reading frame 54	-0.206635626638735	5.72481100197462	-1.89381771663321	0.0658746357121308	0.99842033550169	-4.15933238532862
SFXN1		7572	94081	sideroflexin 1	0.286660646318773	4.99622406047969	1.89305117229433	0.0659793743883974	0.99842033550169	-4.18570003498458
FAM117B		5986	150864	family with sequence similarity 117 member B	0.440840619406846	5.008556855451	1.8917887264996	0.0661521827751481	0.99842033550169	-4.18767749420472
KANK1		11908	23189	KN motif and ankyrin repeat domains 1	0.567205277760259	3.22732409599103	1.891056421009	0.0662526011098309	0.99842033550169	-4.31483227376251
ACVR1C		9195	130399	activin A receptor type 1C	0.819073761696489	2.16665408020868	1.89077764745405	0.0662908625909477	0.99842033550169	-4.41143867329288
ZNF385D		13621	79750	zinc finger protein 385D	-0.676472777461572	1.32936714383847	-1.89050716106851	0.0663280047521817	0.99842033550169	-4.4792498039641
C2CD5		6759	9847	C2 calcium dependent domain containing 5	-0.11151085407114	6.72026923520493	-1.8897840313044	0.0664273897104088	0.99842033550169	-4.14295123472016
KCTD20		6239	222658	potassium channel tetramerization domain containing 20	-0.167693015360562	7.49609406100469	-1.88840430779861	0.0666173689215401	0.99842033550169	-4.14341589394705
PFKM		7284	5213	phosphofructokinase, muscle	0.234680077763318	3.19172747969374	1.88755845526162	0.0667340673468601	0.99842033550169	-4.31756653886944
ATP8B2		7572	57198	ATPase phospholipid transporting 8B2	0.310814031743727	6.95821238323897	1.88726009733668	0.0667752721654109	0.99842033550169	-4.14266742939836
RARS2		2545	57038	arginyl-tRNA synthetase 2, mitochondrial	-0.153061257168896	5.29691547009404	-1.88695473441886	0.0668174669621121	0.99842033550169	-4.18064674821136
IPO11		7540	51194	importin 11	0.204845091768119	4.55603366368347	1.88548057557974	0.0670214862116501	0.99842033550169	-4.22142866290882
PLEK		3314	5341	pleckstrin	-0.292287649324598	7.2214209877557	-1.88494087360785	0.0670963125920798	0.99842033550169	-4.14476488764606
[truncated: 12,176 more rows]

## Sheet: 3A RT1T0
GeneID		GeneID	Length	entrezid	name	logFC	AveExpr	t	P.Value	adj.P.Val	B		Whole blood transcriptional profiling
[truncated: 12,666 more rows]

## Sheet: 3B RT1T0 FC>2
GeneID	name	logFC	P,Value	adj,P,Val			Whole blood transcriptional profiling
[truncated: 33 more rows]

[truncated: 2 more sheets: 4 Reactome_ORA_Responders, 5 NRT1T0]
