# Supplementary material for: Differences in Whole-Blood Transcriptional Profiles in Inflammatory Bowel Disease Patients Responding to Vedolizumab Compared with Non-Responders
Source: Int J Mol Sci. 2023 Mar 18;24(6):5820. doi: 10.3390/ijms24065820 (PMC10052064; doi:10.3390/ijms24065820)
Supplement: Supplementary file 1 [file ijms-24-05820-s001.zip › Supplementary Table S4.xlsx]

## Sheet: 1 Reac T0RNR
Reactome pathways upregulated in responders at baseline	SIZE	ES	NES	NOM p-val	FDR q-val	FWER p-val						__mclCluster	EnrichmentMap::GS_DESCR	EnrichmentMap::gs_size	EnrichmentMap::fdr_qvalue (210628_GSEA_Reactom_T0RNR)	EnrichmentMap::NES (210628_GSEA_Reactom_T0RNR)	EnrichmentMap::pvalue (210628_GSEA_Reactom_T0RNR)	EnrichmentMap::Genes
AMINO ACID TRANSPORT ACROSS THE PLASMA MEMBRANE%REACTOME DATABASE ID RELEASE 73%352230	19	0.8166065	2.297864	0.0	2.4367834E-4	2.0E-4							Amino acid transport across the plasma membrane	32	0.0002	2.2979	0	SLC7A7|SLC6A12|SLC7A9|SLC38A1|SLC3A1|SLC3A2|SLC16A10|SLC6A6|SLC6A20|SLC1A4|SLC1A5|SLC7A11|SLC7A10|SLC38A3|SLC38A2|SLC38A5|SLC38A4|SLC7A5|SLC7A6|SLC36A1|SLC7A8|SLC43A2|SLC43A1|SLC7A1|SLC7A3|SLC6A19|SLC6A18|SLC36A2|SLC6A14|SLC25A29|SLC36A4|SLC6A15
LEISHMANIA PHAGOCYTOSIS%REACTOME%R-HSA-9664417.1	58	0.63250095	2.276804	0.0	1.2183917E-4	2.0E-4				Cluster information		4	Leishmania phagocytosis	67	0.0001	2.2768	0	IGHG2|WASL|YES1|VAV1|VAV2|ACTB|MYO10|LYN|IGKV5-2|IGKV2-28|IGKV1-12|IGKV3D-20|IGKV2D-28|IGKV4-1|CYFIP2|CYFIP1|IGKV2D-30|NCKAP1|WIPF1|WIPF2|WIPF3|IGKV3-11|WAS|BRK1|NCKIPSD|NCKAP1L|WASF1|WASF2|WASF3|BAIAP2|ABI2|MYO5A|ABI1|MYH9|FGR|CDC42|CD3G|ARPC1B|ARPC1A|MYH2|MYO9B|ACTG1|ABL1|MYO1C|FYN|PTK2|HCK|BTK|SYK|FCGR3A|ARPC4|ARPC5|ARPC2|ELMO1|ARPC3|ELMO2|DOCK1|CRK|NCK1|ACTR3|ACTR2|RAC1|VAV3|IGHG4|MAPK1|IGHG1…
REGULATION OF ACTIN DYNAMICS FOR PHAGOCYTIC CUP FORMATION%REACTOME DATABASE ID RELEASE 73%2029482	61	0.62472117	2.2728913	0.0	8.122611E-5	2.0E-4				associated with Figure 3		4	Regulation of actin dynamics for phagocytic cup formation	70	0.0001	2.2729	0	IGHG2|WASL|VAV1|NF2|VAV2|ACTB|CFL1|MYO10|IGKV5-2|IGKV2-28|IGKV1-12|IGKV3D-20|IGKV2D-28|IGKV4-1|CYFIP2|CYFIP1|IGKV2D-30|NCKAP1|WIPF1|WIPF2|WIPF3|IGKV3-11|WAS|BRK1|NCKIPSD|NCKAP1L|WASF1|WASF2|WASF3|BAIAP2|ABI2|MYO5A|HSP90AB1|ABI1|MYH9|CDC42|CD3G|PAK1|ARPC1B|ARPC1A|MYH2|LIMK1|MYO9B|ACTG1|ABL1|MYO1C|PTK2|BTK|HSP90AA1|FCGR1A|SYK|FCGR3A|ARPC4|FCGR2A|ARPC5|ARPC2|ELMO1|ARPC3|ELMO2|DOCK1|CRK|NCK1|ACTR3|AC…
PARASITE INFECTION%REACTOME%R-HSA-9664407.1	58	0.63250095	2.272331	0.0	6.0919585E-5	2.0E-4						4	Parasite infection	67	0.0001	2.2723	0	IGHG2|WASL|YES1|VAV1|VAV2|ACTB|MYO10|LYN|IGKV5-2|IGKV2-28|IGKV1-12|IGKV3D-20|IGKV2D-28|IGKV4-1|CYFIP2|CYFIP1|IGKV2D-30|NCKAP1|WIPF1|WIPF2|WIPF3|IGKV3-11|WAS|BRK1|NCKIPSD|NCKAP1L|WASF1|WASF2|WASF3|BAIAP2|ABI2|MYO5A|ABI1|MYH9|FGR|CDC42|CD3G|ARPC1B|ARPC1A|MYH2|MYO9B|ACTG1|ABL1|MYO1C|FYN|PTK2|HCK|BTK|SYK|FCGR3A|ARPC4|ARPC5|ARPC2|ELMO1|ARPC3|ELMO2|DOCK1|CRK|NCK1|ACTR3|ACTR2|RAC1|VAV3|IGHG4|MAPK1|IGHG1…
FCGR3A-MEDIATED PHAGOCYTOSIS%REACTOME DATABASE ID RELEASE 73%9664422	58	0.63250095	2.2717292	0.0	4.8735666E-5	2.0E-4						4	FCGR3A-mediated phagocytosis	67	0	2.2717	0	IGHG2|WASL|YES1|VAV1|VAV2|ACTB|MYO10|LYN|IGKV5-2|IGKV2-28|IGKV1-12|IGKV3D-20|IGKV2D-28|IGKV4-1|CYFIP2|CYFIP1|IGKV2D-30|NCKAP1|WIPF1|WIPF2|WIPF3|IGKV3-11|WAS|BRK1|NCKIPSD|NCKAP1L|WASF1|WASF2|WASF3|BAIAP2|ABI2|MYO5A|ABI1|MYH9|FGR|CDC42|CD3G|ARPC1B|ARPC1A|MYH2|MYO9B|ACTG1|ABL1|MYO1C|FYN|PTK2|HCK|BTK|SYK|FCGR3A|ARPC4|ARPC5|ARPC2|ELMO1|ARPC3|ELMO2|DOCK1|CRK|NCK1|ACTR3|ACTR2|RAC1|VAV3|IGHG4|MAPK1|IGHG1…
FCGAMMA RECEPTOR (FCGR) DEPENDENT PHAGOCYTOSIS%REACTOME DATABASE ID RELEASE 73%2029480	82	0.586996	2.250027	0.0	8.257176E-5	4.0E-4						4	Fcgamma receptor (FCGR) dependent phagocytosis	94	0.0001	2.25	0	IGHG2|WASL|YES1|VAV1|NF2|VAV2|ACTB|CFL1|MYO10|LYN|IGKV5-2|IGKV2-28|IGKV1-12|IGKV3D-20|IGKV2D-28|IGKV4-1|CYFIP2|CYFIP1|IGKV2D-30|NCKAP1|WIPF1|WIPF2|WIPF3|IGKV3-11|WAS|BRK1|NCKIPSD|NCKAP1L|PLCG2|WASF1|WASF2|WASF3|BAIAP2|ABI2|MYO5A|HSP90AB1|ABI1|PPAPDC1A|PPAPDC1B|MYH9|FGR|PLD4|CDC42|CD3G|PAK1|ARPC1B|ARPC1A|PLD1|ITPR1|ITPR2|PLD3|MYH2|ITPR3|PLD2|AHCYL1|LIMK1|MYO9B|ACTG1|ABL1|MYO1C|FYN|PRKCE|PTK2|HCK|P…
GLYCOSAMINOGLYCAN METABOLISM%REACTOME%R-HSA-1630316.2	70	0.5879833	2.1817448	0.0	3.6543972E-4	0.0021							Glycosaminoglycan metabolism	120	0.0004	2.1817	0	GLB1|HS3ST4|HS3ST1|HS3ST2|SLC26A2|OGN|HPSE|XYLT2|XYLT1|LYVE1|GLCE|GNS|CHST11|CHST12|CHST15|ST3GAL4|CHST13|CHST14|ST3GAL6|ST3GAL1|ST3GAL2|ST3GAL3|B4GALT2|B4GALT3|B4GALT1|SGSH|HS2ST1|GUSB|ABCC5|B4GALT6|B4GALT7|B4GALT4|B4GALT5|OMD|CHSY1|CHSY3|PRELP|LUM|B3GAT3|B3GAT2|B3GAT1|FMOD|NDST2|EXT1|NDST1|CHPF|EXT2|NDST4|NDST3|CHP1|IDUA|HEXB|NCAN|CSGALNACT1|HEXA|CSGALNACT2|BGN|VCAN|HYAL1|CEMIP|HYAL3|CSPG5|KERA…
PLATELET ACTIVATION, SIGNALING AND AGGREGATION%REACTOME DATABASE ID RELEASE 73%76002	183	0.504587	2.1741939	0.0	3.976081E-4	0.0026						18	Platelet activation, signaling and aggregation	254	0.0004	2.1742	0	CD9|VAV1|VAV2|CD109|APP|GNA13|PRKCB|APBB1IP|RAF1|TLN1|VCL|ITGB3|ITGA2B|ARRB1|ARRB2|RAP1B|SPARC|RAP1A|CSK|CAP1|FLNA|FN1|PPBP|MGLL|CLU|PIK3R3|PIK3R2|PIK3R6|PIK3R5|PDGFB|MAPK14|AKT1|PRKCD|HGF|PRKCA|F2RL2|YWHAZ|F2RL3|VEGFC|VEGFA|FIGF|VEGFB|PSAP|BRPF3|PPIA|RAPGEF3|RAPGEF4|LCP2|LAT|THBS1|PTPN1|STXBP2|STX4|PRKCH|RAC2|RHOG|DGKG|DGKE|DGKD|DGKB|DGKA|ABHD12|LYN|PDPK1|DGKZ|DGKQ|DGKK|DGKI|DGKH|PRKCQ|ABHD6|ISL…
TRANSPORT OF INORGANIC CATIONS ANIONS AND AMINO ACIDS OLIGOPEPTIDES%REACTOME DATABASE ID RELEASE 73%425393	56	0.6042619	2.163036	0.0	3.805048E-4	0.0028							Transport of inorganic cations anions and amino acids oligopeptides	104	0.0004	2.163	0	SLC9A9|SLC26A2|SLC1A1|SLC1A3|SLC6A20|SLC5A5|SLC8A1|SLC26A4|SLC8A2|SLC26A3|SLC36A2|AHCYL2|SLC4A2|SLC4A3|SLC4A5|SLC12A7|SRI|SLC6A15|SLC7A7|SLC6A12|SLC7A9|SLC5A8|SLC24A1|SLC24A4|SLC20A2|SLC3A1|SLC3A2|SLC8A3|SLC16A10|SLC6A6|SLC17A5|SLC17A8|SLC12A3|SLC7A11|SLC7A10|SLC12A1|SLC24A5|SLC32A1|SLC4A1|SLC4A4|SLC7A5|SLC12A6|SLC7A6|SLC7A8|SLC43A2|SLC34A3|SLC20A1|SLC43A1|SLC34A2|SLC7A1|SLC7A3|SLC6A19|SLC17A6|SL…
EPH-EPHRIN SIGNALING%REACTOME DATABASE ID RELEASE 73%2682334	66	0.5786798	2.1290543	0.0	8.329799E-4	0.0066						19	EPH-Ephrin signaling	90	0.0008	2.1291	0	ROCK1|WASL|YES1|ROCK2|VAV2|GRIN2B|TIAM1|ACTB|CFL1|LYN|ARHGEF7|EPHA5|EPHA4|EPHA7|NGEF|EPHA6|EPHA8|KALRN|ADAM10|CLTC|EFNA5|EFNA4|CLTA|MYH14|AP2A1|MYH11|EPHA1|MYH10|EPHA3|AP2A2|EPHA2|EFNA1|EFNA3|EPHA10|EFNA2|PSEN1|AP2M1|APH1A|APH1B|NCSTN|MYL6|DNM1|MYH9|CDC42|PAK1|ARPC1B|AP2S1|ARPC1A|CLTB|AP2B1|MYL12B|LIMK2|LIMK1|HRAS|GRIN1|RASA1|ACTG1|MMP2|FYN|MMP9|PTK2|EFNB3|RHOA|NCK2|PAK3|EPHB2|PSENEN|EPHB1|CLTCL1…
EPH-EPHRIN MEDIATED REPULSION OF CELLS%REACTOME DATABASE ID RELEASE 73%3928665	30	0.6766438	2.125503	0.0	8.3437935E-4	0.0073						19	EPH-ephrin mediated repulsion of cells	47	0.0008	2.1255	0	YES1|VAV2|TIAM1|MMP2|LYN|MMP9|EPHA5|FYN|EPHA4|EPHA7|EPHA6|EPHA8|EFNB3|ADAM10|EFNA5|CLTC|EFNA4|EPHB2|CLTA|EPHB1|PSENEN|CLTCL1|AP2A1|EPHB4|EPHA1|EPHA3|EPHB3|PSEN2|EFNA1|EPHA2|AP2A2|EFNA3|EFNB2|EPHA10|EFNA2|EFNB1|PSEN1|APH1A|AP2M1|APH1B|NCSTN|DNM1|RAC1|VAV3|AP2S1|CLTB|AP2B1
INTEGRIN SIGNALING%REACTOME%R-HSA-354192.2	19	0.75134933	2.120257	0.0	8.2668697E-4	0.0079						8	Integrin signaling	26	0.0008	2.1203	0	PTPN1|PDPK1|PTK2|FGB|RASGRP2|FGA|RASGRP1|APBB1IP|SOS1|VWF|SHC1|TLN1|FGG|SYK|ITGB3|ITGA2B|CRK|RAP1B|RAP1A|CSK|BCAR1|AKT1|FN1|RAPGEF3|RAPGEF4|SRC
SEMAPHORIN INTERACTIONS%REACTOME DATABASE ID RELEASE 73%373755	48	0.6061575	2.113896	0.0	8.861704E-4	0.0092							Semaphorin interactions	64	0.0009	2.1139	0	ROCK1|CRMP1|ROCK2|PIP5K1C|CFL1|SEMA3A|SEMA3E|SEMA4A|SEMA4D|DPYSL4|MYH14|MYH11|DPYSL5|MYH10|DPYSL2|DPYSL3|PLXNA4|CDK5R1|TLN1|FES|RRAS|HSP90AB1|MYL6|CDK5|NRP1|MYH9|PAK1|MET|MYL12B|CD72|LIMK2|GSK3B|LIMK1|FARP2|FYN|SEMA5A|PLXND1|TYROBP|RHOA|PLXNC1|PAK3|PAK2|SEMA6A|SEMA6D|HSP90AA1|ARHGAP35|SEMA7A|PLXNA2|PLXNA1|RHOC|PTPRC|PLXNA3|MYL9|RHOB|ITGB1|PLXNB3|PLXNB1|RND1|TREM2|RAC1|ERBB2|ITGA1|ARHGEF11|ARHGEF12
REGULATED PROTEOLYSIS OF P75NTR%REACTOME%R-HSA-193692.1	10	0.8917629	2.1055121	0.0	0.0010148698	0.0114							Regulated proteolysis of p75NTR	11	0.001	2.1055	0	PSEN1|RELA|NFKB1|NGFR|APH1A|TRAF6|APH1B|NCSTN|ADAM17|PSENEN|PSEN2
SEMA4D IN SEMAPHORIN SIGNALING%REACTOME DATABASE ID RELEASE 73%400685	19	0.7449	2.0993848	0.0	0.0011114487	0.0134						10	Sema4D in semaphorin signaling	24	0.0011	2.0994	0	ROCK1|LIMK2|MYL12B|ROCK2|LIMK1|RHOC|RRAS|MYL9|RHOB|MYL6|PLXNB1|MYH9|RND1|RAC1|RHOA|ERBB2|ARHGEF11|SEMA4D|MYH14|MYH11|ARHGEF12|MYH10|MET|ARHGAP35
LEISHMANIA INFECTION%REACTOME DATABASE ID RELEASE 73%9658195	150	0.49393284	2.0814624	0.0	0.001504683	0.0193						7	Leishmania infection	255	0.0015	2.0815	0	ADORA2B|VAV1|VAV2|MYO10|RXFP1|RXFP2|MAPK8|C3AR1|FSHB|MYO5A|MC2R|GPR15|RELA|GPR27|GPR25|GPR20|PTH1R|GPR32|PTH2R|GPR45|GPR83|TSHB|MC1R|PTH2|AHCYL1|FSHR|CD163|NFKB1|MYO9B|PTHLH|GPR176|MC4R|ENTPD1|ACTG1|GPR150|GPHA2|CRH|ENTPD5|GPHB5|PTGER2|LHCGR|CRHR1|PTGDR|PTGER4|GPBAR1|PTH|RHBDF2|TSHR|MC3R|NPSR1|FCGR1A|NPS|CYSLTR2|MAPK14|MC5R|IGHG4|IGHG1|IGHG2|TXN|WASL|ACTB|VIPR1|VIPR2|GIPR|SCT|GHRHR|GLP2R|SCTR|GHR…
VEGFA-VEGFR2 PATHWAY%REACTOME%R-HSA-4420097.3	76	0.54948217	2.073757	0.0	0.0015916976	0.0217						22	VEGFA-VEGFR2 Pathway	91	0.0016	2.0738	0	ROCK1|SHB|ROCK2|VAV1|VAV2|KDR|SHC2|MAPKAP1|SH2D2A|CYBA|MAPK12|MAPK13|PDPK1|AXL|CYFIP2|CYFIP1|NCKAP1|PRKCB|BRK1|NCKAP1L|WASF1|WASF2|WASF3|ITGB3|BAIAP2|ABI2|ABI1|JUP|MAPKAPK3|CDC42|PAK1|ITPR1|NCF1|ITPR2|ITPR3|NCF2|NCF4|AHCYL1|HRAS|CAV1|RICTOR|RASA1|NOS3|NRAS|PRR5|FYN|ITGAV|TRIB3|PTK2B|PTK2|SPHK1|PRKCZ|RHOA|CTNND1|AKT3|NCK2|CDH5|PAK3|PAK2|PIK3R2|HSP90AA1|AKT2|MLST8|PIK3R1|CTNNB1|THEM4|PIK3CA|PLCG1|M…
O-LINKED GLYCOSYLATION OF MUCINS%REACTOME%R-HSA-913709.3	30	0.6514876	2.0542011	0.0	0.0021705555	0.0312						23	O-linked glycosylation of mucins	61	0.0022	2.0542	0	ST6GALNAC4|MUC20|GALNT3|GALNT11|GALNT14|GALNT13|GALNT16|GALNT15|GALNT18|GALNT10|WBSCR17|ST3GAL4|GALNTL5|ST3GAL1|GALNTL6|B3GNTL1|ST3GAL2|GALNT9|ST3GAL3|GALNT8|B3GNT9|B3GNT8|B3GNT6|B3GNT5|CHST4|GCNT1|GCNT3|GCNT4|GCNT7|GALNT7|GALNT6|GALNT5|GALNT4|GALNT2|A4GNT|B4GALT6|B4GALT5|MUC5AC|MUC1|C1GALT1C1|MUC12|MUC7|MUC13|MUC15|MUC4|MUC21|MUC6|MUCL1|MUC17|GALNT1|C1GALT1|MUC5B|MUC3A|ST6GALNAC2|GALNT12|B3GNT7|…
SIGNALING BY VEGF%REACTOME DATABASE ID RELEASE 73%194138	81	0.5354976	2.0514019	0.0	0.0021669967	0.0328						22	Signaling by VEGF	101	0.0022	2.0514	0	ROCK1|SHB|ROCK2|VAV1|VAV2|SH2D2A|PDPK1|AXL|PRKCB|ITGB3|NRP1|NRP2|CDC42|PAK1|ITPR1|ITPR2|ITPR3|AHCYL1|HRAS|CAV1|RICTOR|RASA1|NOS3|NRAS|PRR5|FYN|ITGAV|TRIB3|PTK2|PRKCZ|RHOA|CTNND1|NCK2|CDH5|PAK3|PAK2|PIK3R2|HSP90AA1|AAMP|AKT2|PIK3R1|MLST8|PIK3CA|PLCG1|MTOR|ELMO1|ELMO2|DOCK1|MAPK14|CRK|MAPK11|HSPB1|PXN|CTNNA1|AKT1|BCAR1|PRKACG|PRKCD|PRKCA|PRKACA|MAPKAPK2|PRKACB|VEGFC|PGF|VEGFA|FIGF|FLT1|FLT4|VEGFB|S…
PRE-NOTCH EXPRESSION AND PROCESSING%REACTOME%R-HSA-1912422.1	44	0.60032904	2.0490615	0.0	0.0021319992	0.034						16	Pre-NOTCH Expression and Processing	109	0.0021	2.0491	0	RUNX1|TNRC6C|JUN|SNW1|NOTCH2|SEL1L|NOTCH3|NOTCH4|ATP2A3|ATP2A2|SIRT6|ATP2A1|ELF3|ST3GAL4|MAMLD1|ST3GAL6|ST3GAL3|B4GALT1|E2F1|E2F3|TFDP1|TFDP2|RFNG|POGLUT1|POFUT1|MFNG|RAB6A|MAML2|MAML1|MAML3|HIST1H2AE|HIST1H2AD|EP300|HIST3H2BB|HIST1H2AC|HIST1H2AB|HIST1H2AJ|HIST2H3A|HIST1H2BF|HIST1H2BE|HIST1H2BH|HIST1H2BG|HIST1H2BB|HIST2H3D|HIST1H2BA|HIST2H3C|HIST1H2BD|HIST1H2BC|H2AFB1|HIST1H3J|LFNG|HIST1H3A|HIST1…
SIGNALING BY NOTCH3%REACTOME%R-HSA-9012852.2	35	0.626768	2.0438201	0.0	0.0021825056	0.0366						12	Signaling by NOTCH3	48	0.0022	2.0438	0	RPS27A|MAML3|SNW1|HES1|NEURL1|EP300|TACC3|WWC1|NOTCH3|CREBBP|STAT1|YBX1|FABP7|NEURL1B|JAG2|HES5|DLL4|DLGAP5|PLXND1|JAG1|PTCRA|NOTCH1|WWP2|DLL1|MIB1|RBPJ|HEYL|ADAM10|PSENEN|HEY1|KAT2B|KAT2A|PSEN2|HEY2|EGF|PSEN1|MAMLD1|EGFR|APH1A|APH1B|UBA52|NCSTN|MAML2|MAML1|PBX1|MIB2|UBB|UBC
FCERI MEDIATED MAPK ACTIVATION%REACTOME%R-HSA-2871796.2	28	0.657395	2.0357118	0.0	0.0024926697	0.0436							FCERI mediated MAPK activation	34	0.0025	2.0357	0	HRAS|VAV1|JUN|VAV2|NRAS|LYN|IGKV5-2|IGKV2-28|IGKV1-12|IGKV3D-20|IGKV2D-28|IGKV4-1|IGHE|IGKV2D-30|MAPK8|PAK2|SOS1|IGKV3-11|PLCG2|MAPK9|SYK|MAP2K7|PLCG1|MAP3K1|MAPK10|FOS|MAP2K4|RAC1|PAK1|VAV3|GRAP2|LCP2|MAPK1|MAPK3
MAP2K AND MAPK ACTIVATION%REACTOME DATABASE ID RELEASE 73%5674135	30	0.6478254	2.0332055	2.0136932E-4	0.0024742691	0.0453						1	MAP2K and MAPK activation	37	0.0025	2.0332	0.0002	HRAS|WDR83|NRAS|FGB|FGA|APBB1IP|VWF|CNKSR1|RAF1|TLN1|VCL|FGG|IL17RD|ITGB3|ITGA2B|ARAF|PEBP1|ARRB1|IQGAP1|ARRB2|RAP1B|RAP1A|YWHAB|CSK|LAMTOR2|MARK3|MAP2K1|LAMTOR3|MAP2K2|KSR1|FN1|BRAF|KSR2|CNKSR2|MAPK1|SRC|MAPK3
SIGNALING BY EGFR%REACTOME DATABASE ID RELEASE 73%177929	38	0.6166473	2.032412	1.9611689E-4	0.0024019112	0.0459							Signaling by EGFR	48	0.0024	2.0324	0.0002	RPS27A|SH3GL3|HRAS|EPS15|SH3GL1|STAM2|NRAS|ARHGEF7|STAM|SH3KBP1|SH3GL2|AREG|SPRY2|PTPRK|EPS15L1|EPGN|EPN1|ADAM10|PTPN12|ADAM17|SOS1|AAMP|EGF|SHC1|LRIG1|GAB1|SPRY1|PIK3R1|CBL|EGFR|EREG|PIK3CA|BTC|PLCG1|UBA52|PTPN3|HGS|HBEGF|ADAM12|PAG1|CSK|PXN|TGFA|CDC42|UBB|UBC|SRC|PTPN11
NUCLEAR SIGNALING BY ERBB4%REACTOME DATABASE ID RELEASE 73%1251985	20	0.7097363	2.0164254	2.0124773E-4	0.0031026301	0.0613						20	Nuclear signaling by ERBB4	31	0.0031	2.0164	0.0002	STAT5A|PGR|CSN2|STMN1|ADAP1|MXD4|TAB2|YAP1|WWOX|CXCL12|ADAM17|PSENEN|PSEN2|NRG1|PSEN1|NRG2|GFAP|EREG|APH1A|BTC|APH1B|NRG3|NCSTN|NRG4|S100B|HBEGF|SPARC|ESR1|APOE|NCOR1|SRC
AQUAPORIN-MEDIATED TRANSPORT%REACTOME DATABASE ID RELEASE 73%445717	27	0.6541582	2.0009851	2.002002E-4	0.0038769294	0.0789						9	Aquaporin-mediated transport	52	0.0039	2.001	0.0002	ADCY4|AQP1|ADCY3|MIP|ADCY2|AQP11|ADCY1|AQP12A|ADCY8|AQP10|ADCY7|AQP8|ADCY6|AQP9|ADCY5|AQP6|AQP7|AQP4|AQP5|AQP2|AQP3|RAB11A|ADCY9|PRKAR1B|PRKAR1A|PRKAR2B|PRKAR2A|GNAS|GNG10|AVPR2|GNG12|GNG11|GNG13|GNB2|GNB1|AVP|GNB4|RAB11FIP2|MYO5B|GNB3|GNB5|GNGT1|GNGT2|GNG3|GNG2|GNG5|GNG4|GNG7|GNG8|PRKACG|PRKACA|PRKACB
SEMA4D INDUCED CELL MIGRATION AND GROWTH-CONE COLLAPSE%REACTOME%R-HSA-416572.2	16	0.7443607	1.9964138	6.0802593E-4	0.004000913	0.0842						10	Sema4D induced cell migration and growth-cone collapse	20	0.004	1.9964	0.0006	ROCK1|LIMK2|MYL12B|ROCK2|LIMK1|RHOC|MYL9|RHOB|MYL6|PLXNB1|MYH9|RND1|RHOA|ERBB2|ARHGEF11|SEMA4D|MYH14|MYH11|ARHGEF12|MYH10
REGULATION OF INSULIN SECRETION%REACTOME%R-HSA-422356.3	43	0.5857696	1.9901139	2.0064205E-4	0.004227378	0.0919						7	Anti-inflammatory response favouring Leishmania parasite infection	174	0.0045	1.9843	0	YES1|ADORA2B|P2RY11|LYN|IGKV5-2|CYSLTR1|IGKV2-28|IGKV1-12|IGKV3D-20|ADCY4|IGKV2D-28|ADCY3|ADCY2|IGKV4-1|ADCY1|RXFP1|ADCY8|RXFP2|ADCY7|ADCY6|IGKV2D-30|ADCY5|IGKV3-11|PLCG2|FSHB|ADCY9|PRKAR1B|PRKAR1A|PRKAR2B|PTGIR|GLP1R|PRKAR2A|MC2R|GPR15|FGR|GNAS|GPR27|GPR25|GPR20|PTH1R|GPR32|PTH2R|GPR45|AVPR2|ITPR1|ITPR2|TSHB|GPR83|ITPR3|MC1R|AHCYL1|PTH2|FSHR|CD163|AVP|PTHLH|GPR176|GIP|MC4R|IL6|GPR150|GPHA2|CRH|G…
ANTI-INFLAMMATORY RESPONSE FAVOURING LEISHMANIA PARASITE INFECTION%REACTOME%R-HSA-9662851.1	79	0.52036643	1.9842808	0.0	0.0045080427	0.101						1	Signaling by high-kinase activity BRAF mutants	33	0.0048	1.9755	0	HRAS|NRAS|FGB|FGA|APBB1IP|VWF|CNKSR1|RAF1|TLN1|VCL|FGG|ITGB3|ITGA2B|ARAF|PEBP1|ARRB1|IQGAP1|ARRB2|RAP1B|RAP1A|YWHAB|CSK|MARK3|MAP2K1|MAP2K2|KSR1|FN1|BRAF|KSR2|CNKSR2|MAPK1|SRC|MAPK3
PRE-NOTCH PROCESSING IN GOLGI%REACTOME DATABASE ID RELEASE 73%1912420	15	0.7480655	1.9812431	6.081492E-4	0.004616156	0.1064						7	Leishmania parasite growth and survival	174	0.0047	1.9754	0	YES1|ADORA2B|P2RY11|LYN|IGKV5-2|CYSLTR1|IGKV2-28|IGKV1-12|IGKV3D-20|ADCY4|IGKV2D-28|ADCY3|ADCY2|IGKV4-1|ADCY1|RXFP1|ADCY8|RXFP2|ADCY7|ADCY6|IGKV2D-30|ADCY5|IGKV3-11|PLCG2|FSHB|ADCY9|PRKAR1B|PRKAR1A|PRKAR2B|PTGIR|GLP1R|PRKAR2A|MC2R|GPR15|FGR|GNAS|GPR27|GPR25|GPR20|PTH1R|GPR32|PTH2R|GPR45|AVPR2|ITPR1|ITPR2|TSHB|GPR83|ITPR3|MC1R|AHCYL1|PTH2|FSHR|CD163|AVP|PTHLH|GPR176|GIP|MC4R|IL6|GPR150|GPHA2|CRH|G…
SIGNALING BY HIGH-KINASE ACTIVITY BRAF MUTANTS%REACTOME%R-HSA-6802948.1	27	0.64342606	1.9755414	0.0	0.0048158388	0.1141						1	Signaling by RAF1 mutants	37	0.0058	1.9525	0.0002	HRAS|NRAS|JAK2|FGB|FGA|APBB1IP|VWF|CNKSR1|RAF1|TLN1|VCL|FGG|CAMK2B|CAMK2D|ITGB3|ITGA2B|CAMK2A|ARAF|ARRB1|IQGAP1|ARRB2|RAP1B|RAP1A|YWHAB|CSK|CAMK2G|MARK3|MAP2K1|MAP2K2|KSR1|FN1|BRAF|KSR2|CNKSR2|MAPK1|SRC|MAPK3
LEISHMANIA PARASITE GROWTH AND SURVIVAL%REACTOME%R-HSA-9664433.1	79	0.52036643	1.9753984	0.0	0.0046692872	0.1142						11	Signaling by NTRK1 (TRKA)	112	0.0059	1.9498	0	NGF|TPH1|EGR1|RPS6KA3|RPS6KA5|RPS6KA2|RPS6KA1|NTRK1|EGR2|CDK5|FOS|RAP1A|IRS1|IRS2|MAP2K1|MAP2K2|BRAF|DNM2|HRAS|PPP2CA|PPP2CB|PPP2R1B|PPP2R1A|NRAS|SH3GL2|SRF|ELK1|RHOA|CREB1|PIK3R2|SOS1|SHC1|PIK3R1|PIK3CA|PLCG1|MAPK14|CRK|MAPK11|REST|YWHAB|VGF|JUNB|DUSP3|PPP2R5D|VRK3|DUSP6|DUSP7|NTRK2|MAPKAPK2|MAPK7|MAPK1|MAPK3|DUSP4|RALA|SH3GL3|ADCYAP1|ARC|F3|MAP2K5|TRIB1|SHC2|ADCYAP1R1|RRAD|RALGDS|JUND|EP300|EGR…
FCGR3A-MEDIATED IL10 SYNTHESIS%REACTOME%R-HSA-9664323.1	34	0.606817	1.9710186	0.0	0.0049119676	0.1239						3	Signaling by NOTCH1 PEST Domain Mutants in Cancer	57	0.0063	1.9442	0.0002	MAML3|SNW1|EP300|NEURL1|NEURL1B|HES5|MIB1|HEYL|TBL1X|ADAM10|SKP1|ADAM17|HEY1|HEY2|RBX1|PSEN1|MAMLD1|HDAC6|APH1A|APH1B|UBA52|TBL1XR1|CDK8|NCSTN|CUL1|NCOR2|UBB|NCOR1|UBC|RPS27A|HES1|HDAC4|CREBBP|HDAC5|JAG2|DLL4|JAG1|NOTCH1|DLL1|RBPJ|HDAC8|HDAC9|HDAC7|PSENEN|KAT2B|CCNC|KAT2A|HDAC3|PSEN2|HDAC2|MAML2|MAML1|HDAC1|MYC|HDAC10|HDAC11|MIB2
KERATAN SULFATE BIOSYNTHESIS%REACTOME DATABASE ID RELEASE 73%2022854	14	0.7615804	1.9674851	0.0	0.005021453	0.1299						3	Constitutive Signaling by NOTCH1 HD+PEST Domain Mutants	57	0.0064	1.9422	0.0002	MAML3|SNW1|EP300|NEURL1|NEURL1B|HES5|MIB1|HEYL|TBL1X|ADAM10|SKP1|ADAM17|HEY1|HEY2|RBX1|PSEN1|MAMLD1|HDAC6|APH1A|APH1B|UBA52|TBL1XR1|CDK8|NCSTN|CUL1|NCOR2|UBB|NCOR1|UBC|RPS27A|HES1|HDAC4|CREBBP|HDAC5|JAG2|DLL4|JAG1|NOTCH1|DLL1|RBPJ|HDAC8|HDAC9|HDAC7|PSENEN|KAT2B|CCNC|KAT2A|HDAC3|PSEN2|HDAC2|MAML2|MAML1|HDAC1|MYC|HDAC10|HDAC11|MIB2
INTERLEUKIN-3, INTERLEUKIN-5 AND GM-CSF SIGNALING%REACTOME DATABASE ID RELEASE 73%512988	38	0.59474564	1.9583188	2.0116677E-4	0.0056261364	0.1472						3	Signaling by NOTCH1 in Cancer	57	0.0065	1.9403	0	MAML3|SNW1|EP300|NEURL1|NEURL1B|HES5|MIB1|HEYL|TBL1X|ADAM10|SKP1|ADAM17|HEY1|HEY2|RBX1|PSEN1|MAMLD1|HDAC6|APH1A|APH1B|UBA52|TBL1XR1|CDK8|NCSTN|CUL1|NCOR2|UBB|NCOR1|UBC|RPS27A|HES1|HDAC4|CREBBP|HDAC5|JAG2|DLL4|JAG1|NOTCH1|DLL1|RBPJ|HDAC8|HDAC9|HDAC7|PSENEN|KAT2B|CCNC|KAT2A|HDAC3|PSEN2|HDAC2|MAML2|MAML1|HDAC1|MYC|HDAC10|HDAC11|MIB2
CLATHRIN-MEDIATED ENDOCYTOSIS%REACTOME%R-HSA-8856828.3	110	0.48500535	1.9535719	0.0	0.0059028715	0.1583						3	Constitutive Signaling by NOTCH1 PEST Domain Mutants	57	0.0065	1.9385	0.0002	MAML3|SNW1|EP300|NEURL1|NEURL1B|HES5|MIB1|HEYL|TBL1X|ADAM10|SKP1|ADAM17|HEY1|HEY2|RBX1|PSEN1|MAMLD1|HDAC6|APH1A|APH1B|UBA52|TBL1XR1|CDK8|NCSTN|CUL1|NCOR2|UBB|NCOR1|UBC|RPS27A|HES1|HDAC4|CREBBP|HDAC5|JAG2|DLL4|JAG1|NOTCH1|DLL1|RBPJ|HDAC8|HDAC9|HDAC7|PSENEN|KAT2B|CCNC|KAT2A|HDAC3|PSEN2|HDAC2|MAML2|MAML1|HDAC1|MYC|HDAC10|HDAC11|MIB2
SIGNALING BY RAF1 MUTANTS%REACTOME%R-HSA-9656223.1	29	0.6278748	1.9524853	2.0024029E-4	0.005836216	0.1608						3	Signaling by NOTCH1 HD+PEST Domain Mutants in Cancer	57	0.0064	1.9384	0	MAML3|SNW1|EP300|NEURL1|NEURL1B|HES5|MIB1|HEYL|TBL1X|ADAM10|SKP1|ADAM17|HEY1|HEY2|RBX1|PSEN1|MAMLD1|HDAC6|APH1A|APH1B|UBA52|TBL1XR1|CDK8|NCSTN|CUL1|NCOR2|UBB|NCOR1|UBC|RPS27A|HES1|HDAC4|CREBBP|HDAC5|JAG2|DLL4|JAG1|NOTCH1|DLL1|RBPJ|HDAC8|HDAC9|HDAC7|PSENEN|KAT2B|CCNC|KAT2A|HDAC3|PSEN2|HDAC2|MAML2|MAML1|HDAC1|MYC|HDAC10|HDAC11|MIB2
SIGNALING BY NTRK1 (TRKA)%REACTOME%R-HSA-187037.2	83	0.5088257	1.9497691	0.0	0.005899422	0.1659						2	Ca-dependent events	36	0.0063	1.9378	0.0002	PDE1C|CAMKK1|CAMKK2|ADRBK1|KPNA2|PRKCG|NBEA|ADCY4|ADCY3|ADCY2|ADCY1|ADCY8|ADCY7|ADCY6|ADCY5|CREB1|CAMK4|ADCY9|PRKAR1B|CAMK2B|CAMK2D|PRKX|PRKAR1A|CAMK2A|PRKAR2B|PRKAR2A|PLA2G4A|CAMK2G|PRKACG|PDE1B|PRKCD|PDE1A|PRKCA|PRKACA|MAPK1|PRKACB
SIGNALING BY NOTCH1 PEST DOMAIN MUTANTS IN CANCER%REACTOME%R-HSA-2644602.1	48	0.5586095	1.9442313	1.993223E-4	0.006337918	0.1807						10	RHO GTPases Activate ROCKs	19	0.0063	1.9349	0.0012	ROCK1|LIMK2|MYL12B|ROCK2|LIMK1|PPP1CB|PPP1R12B|RHOC|CFL1|PPP1R12A|MYL9|RHOB|MYL6|MYH9|PAK1|RHOA|MYH14|MYH11|MYH10
CONSTITUTIVE SIGNALING BY NOTCH1 HD+PEST DOMAIN MUTANTS%REACTOME%R-HSA-2894862.1	48	0.5586095	1.9421933	1.9646366E-4	0.0063729123	0.1858						12	Signaling by NOTCH2	33	0.0066	1.9304	0.0006	RPS27A|MAML3|GZMB|HES1|NOTCH2|NEURL1|EP300|NEURL1B|JAG2|HES5|DLL4|JAG1|DLL1|MIB1|RBPJ|ADAM10|FCER2|PSENEN|CREB1|PSEN2|PSEN1|MAMLD1|MDK|APH1A|APH1B|UBA52|NCSTN|MAML2|MAML1|CNTN1|MIB2|UBB|UBC
SIGNALING BY NOTCH1 IN CANCER%REACTOME%R-HSA-2644603.2	48	0.5586095	1.9402534	0.0	0.0064596203	0.1922						1	Signaling downstream of RAS mutants	42	0.0065	1.9302	0.001	HRAS|NRAS|JAK2|FGB|FGA|APBB1IP|VWF|CNKSR1|KRAS|RAF1|TLN1|MAP3K11|VCL|FGG|CAMK2B|CAMK2D|ITGB3|ITGA2B|CAMK2A|ARAF|PEBP1|ARRB1|PHB|IQGAP1|ARRB2|RAP1B|RAP1A|YWHAB|CSK|CAMK2G|MARK3|BRAP|MAP2K1|MAP2K2|KSR1|FN1|BRAF|KSR2|CNKSR2|MAPK1|SRC|MAPK3
CONSTITUTIVE SIGNALING BY NOTCH1 PEST DOMAIN MUTANTS%REACTOME%R-HSA-2644606.1	48	0.5586095	1.9385457	2.0092425E-4	0.0064841514	0.1976						1	Signaling by moderate kinase activity BRAF mutants	42	0.0064	1.9292	0.0008	HRAS|NRAS|JAK2|FGB|FGA|APBB1IP|VWF|CNKSR1|KRAS|RAF1|TLN1|MAP3K11|VCL|FGG|CAMK2B|CAMK2D|ITGB3|ITGA2B|CAMK2A|ARAF|PEBP1|ARRB1|PHB|IQGAP1|ARRB2|RAP1B|RAP1A|YWHAB|CSK|CAMK2G|MARK3|BRAP|MAP2K1|MAP2K2|KSR1|FN1|BRAF|KSR2|CNKSR2|MAPK1|SRC|MAPK3
SIGNALING BY NOTCH1 HD+PEST DOMAIN MUTANTS IN CANCER%REACTOME%R-HSA-2894858.1	48	0.5586095	1.9383737	0.0	0.006350386	0.1982						1	Paradoxical activation of RAF signaling by kinase inactive BRAF	42	0.007	1.9218	0.0004	HRAS|NRAS|JAK2|FGB|FGA|APBB1IP|VWF|CNKSR1|KRAS|RAF1|TLN1|MAP3K11|VCL|FGG|CAMK2B|CAMK2D|ITGB3|ITGA2B|CAMK2A|ARAF|PEBP1|ARRB1|PHB|IQGAP1|ARRB2|RAP1B|RAP1A|YWHAB|CSK|CAMK2G|MARK3|BRAP|MAP2K1|MAP2K2|KSR1|FN1|BRAF|KSR2|CNKSR2|MAPK1|SRC|MAPK3
CA-DEPENDENT EVENTS%REACTOME DATABASE ID RELEASE 73%111996	24	0.6570419	1.9377525	2.0206103E-4	0.0062697106	0.2003						16	Pre-NOTCH Transcription and Translation	93	0.007	1.9199	0.0004	MAML3|RUNX1|JUN|TNRC6C|SNW1|HIST1H2AE|HIST1H2AD|NOTCH2|EP300|HIST3H2BB|HIST1H2AC|HIST1H2AB|NOTCH3|HIST1H2AJ|NOTCH4|HIST2H3A|HIST1H2BF|HIST1H2BE|HIST1H2BH|HIST1H2BG|HIST1H2BB|HIST2H3D|HIST1H2BA|HIST2H3C|HIST1H2BD|HIST1H2BC|H2AFB1|HIST1H3J|SIRT6|HIST1H3A|ELF3|HIST1H3F|MAMLD1|HIST1H3G|HIST1H3H|HIST1H3I|HIST1H3B|HIST1H3C|HIST1H3D|HIST1H3E|HIST1H4K|H3F3B|HIST1H4L|H3F3A|H2BFS|HIST1H4A|TP53|HIST1H4B|HIS…
GPVI-MEDIATED ACTIVATION CASCADE%REACTOME DATABASE ID RELEASE 73%114604	30	0.6185094	1.9373554	5.997601E-4	0.0061716014	0.2015						1	Signaling by RAS mutants	42	0.0069	1.9185	0	HRAS|NRAS|JAK2|FGB|FGA|APBB1IP|VWF|CNKSR1|KRAS|RAF1|TLN1|MAP3K11|VCL|FGG|CAMK2B|CAMK2D|ITGB3|ITGA2B|CAMK2A|ARAF|PEBP1|ARRB1|PHB|IQGAP1|ARRB2|RAP1B|RAP1A|YWHAB|CSK|CAMK2G|MARK3|BRAP|MAP2K1|MAP2K2|KSR1|FN1|BRAF|KSR2|CNKSR2|MAPK1|SRC|MAPK3
RHO GTPASES ACTIVATE ROCKS%REACTOME%R-HSA-5627117.2	17	0.7059685	1.9348513	0.0012172854	0.006284317	0.2082						11	Signaling by NTRKs	131	0.0069	1.9176	0	NGF|GRIN2B|TIAM1|PTPRO|TPH1|EGR1|RPS6KA3|RPS6KA5|RPS6KA2|RPS6KA1|NTRK1|EGR2|CDK5|FOS|RAP1A|IRS1|IRS2|MAP2K1|MAP2K2|PTPRS|BRAF|DNM2|HRAS|PPP2CA|PPP2CB|PPP2R1B|PPP2R1A|NRAS|SH3GL2|SRF|ELK1|RHOA|CREB1|PIK3R2|SOS1|SHC1|GAB1|PIK3R1|PIK3CA|PLCG1|MAPK14|CRK|MAPK11|REST|YWHAB|VGF|JUNB|DUSP3|PPP2R5D|VRK3|DUSP6|NTF4|DUSP7|NTRK2|MAPKAPK2|MAPK7|MAPK1|MAPK3|DUSP4|RALA|SH3GL3|ADCYAP1|ARC|F3|MAP2K5|TRIB1|SHC2|A…
SIGNALING BY NOTCH2%REACTOME DATABASE ID RELEASE 73%1980145	25	0.6402791	1.9303874	5.889282E-4	0.0065798922	0.2219						8	Platelet Aggregation (Plug Formation)	35	0.0072	1.9047	0.0008	THPO|GP1BA|ADRA2C|F2|GP5|ADRA2A|GP9|PTPN1|PDPK1|PTK2|FGB|RASGRP2|FGA|RASGRP1|APBB1IP|SOS1|VWF|SHC1|GP1BB|TLN1|FGG|SYK|ITGB3|ITGA2B|CRK|RAP1B|RAP1A|CSK|MPL|BCAR1|AKT1|FN1|RAPGEF3|RAPGEF4|SRC
SIGNALING DOWNSTREAM OF RAS MUTANTS%REACTOME%R-HSA-9649948.1	34	0.59716254	1.930187	9.958176E-4	0.0064734975	0.2229						9	Vasopressin regulates renal water homeostasis via Aquaporins	43	0.0073	1.9005	0.0004	GNB2|GNB1|AVP|GNB4|RAB11FIP2|GNB3|MYO5B|GNB5|GNGT1|GNGT2|ADCY4|AQP1|ADCY3|ADCY2|ADCY1|ADCY8|ADCY7|ADCY6|ADCY5|AQP4|AQP2|AQP3|RAB11A|ADCY9|PRKAR1B|PRKAR1A|GNG3|GNG2|GNG5|PRKAR2B|GNG4|GNG7|PRKAR2A|GNG8|GNAS|GNG10|PRKACG|AVPR2|PRKACA|GNG12|GNG11|GNG13|PRKACB
SIGNALING BY MODERATE KINASE ACTIVITY BRAF MUTANTS%REACTOME%R-HSA-6802946.1	34	0.59716254	1.9291626	7.9872203E-4	0.006429245	0.2257						13	Neuronal System	379	0.0075	1.8973	0	KCND1|KCNH6|KCND2|KCNH7|AKAP5|KCND3|KCNB2|KCNH8|ARHGEF9|KCNAB1|KCNAB2|KCNAB3|KCNS1|KCNS2|KCNQ1|KCNQ4|KCNA10|KCNQ5|KCNQ2|KCNQ3|PRKCB|CAMK2B|CAMK2D|CAMK2A|KCNJ4|KCNJ12|KCNJ14|KCNJ2|CAMK2G|ALDH2|SLC6A13|SLC6A12|SLC6A11|GRIN1|SLC22A2|SLC22A1|CHRNA2|CHRNB3|CHRNA5|CHRNA4|CHRNA7|BCHE|CHRNA6|STX1A|GLS2|CHRNA9|CHRND|CHRNG|CHRNE|CHRNB2|CHRNA1|CHRNB4|CHRNA3|SLC6A1|SLC18A2|SLC32A1|BZRAP1|HSPA8|CACNA2D2|GABRB…
PARADOXICAL ACTIVATION OF RAF SIGNALING BY KINASE INACTIVE BRAF%REACTOME%R-HSA-6802955.2	34	0.59716254	1.9217523	3.9619653E-4	0.006965397	0.2472						2	Calmodulin induced events	34	0.0073	1.8954	0.0012	PDE1C|CAMKK1|CAMKK2|ADRBK1|KPNA2|PRKCG|NBEA|ADCY4|ADCY3|ADCY2|ADCY1|ADCY8|ADCY7|ADCY6|ADCY5|CREB1|CAMK4|ADCY9|PRKAR1B|CAMK2B|CAMK2D|PRKX|PRKAR1A|CAMK2A|PRKAR2B|PRKAR2A|CAMK2G|PRKACG|PDE1B|PRKCD|PDE1A|PRKCA|PRKACA|PRKACB
PRE-NOTCH TRANSCRIPTION AND TRANSLATION%REACTOME%R-HSA-1912408.4	29	0.6139198	1.9199191	4.0209087E-4	0.007011653	0.2529						2	G-protein mediated events	53	0.0073	1.8935	0.0002	ADCY4|ADCY3|ADCY2|ADCY1|ADCY8|ADCY7|ADCY6|ADCY5|CAMK4|GNAL|ADCY9|CAMK2B|GNAT2|PRKAR1B|CAMK2D|GNAT3|PRKAR1A|CAMK2A|GNAT1|PRKAR2B|PRKAR2A|PLA2G4A|CAMK2G|GNAZ|PDE1B|PDE1A|ITPR1|ITPR2|ITPR3|GNAO1|AHCYL1|PLCB3|PLCB4|PLCB1|PLCB2|PDE1C|CAMKK1|CAMKK2|ADRBK1|KPNA2|PRKCG|NBEA|CREB1|GNAI3|GNAI1|GNAI2|PRKX|PRKACG|PRKCD|PRKCA|PRKACA|PRKACB|MAPK1
DISEASES OF IMMUNE SYSTEM%REACTOME DATABASE ID RELEASE 73%5260271	24	0.6449482	1.9189018	7.927071E-4	0.0069899815	0.2566						2	PLC beta mediated events	52	0.0073	1.8924	0.0002	ADCY4|ADCY3|ADCY2|ADCY1|ADCY8|ADCY7|ADCY6|ADCY5|CAMK4|ADCY9|CAMK2B|GNAT2|PRKAR1B|CAMK2D|GNAT3|PRKAR1A|CAMK2A|GNAT1|PRKAR2B|PRKAR2A|PLA2G4A|CAMK2G|GNAZ|PDE1B|PDE1A|ITPR1|ITPR2|ITPR3|GNAO1|AHCYL1|PLCB3|PLCB4|PLCB1|PLCB2|PDE1C|CAMKK1|CAMKK2|ADRBK1|KPNA2|PRKCG|NBEA|CREB1|GNAI3|GNAI1|GNAI2|PRKX|PRKACG|PRKCD|PRKCA|PRKACA|PRKACB|MAPK1
SIGNALING BY RAS MUTANTS%REACTOME%R-HSA-6802949.2	34	0.59716254	1.918546	0.0	0.0068956264	0.2579						2	CaM pathway	34	0.0073	1.891	0.001	PDE1C|CAMKK1|CAMKK2|ADRBK1|KPNA2|PRKCG|NBEA|ADCY4|ADCY3|ADCY2|ADCY1|ADCY8|ADCY7|ADCY6|ADCY5|CREB1|CAMK4|ADCY9|PRKAR1B|CAMK2B|CAMK2D|PRKX|PRKAR1A|CAMK2A|PRKAR2B|PRKAR2A|CAMK2G|PRKACG|PDE1B|PRKCD|PDE1A|PRKCA|PRKACA|PRKACB
SIGNALING BY NTRKS%REACTOME DATABASE ID RELEASE 73%166520	96	0.4882835	1.9175743	0.0	0.006863341	0.2611						3	Signaling by NOTCH1	72	0.0085	1.8783	0.0004	MAML3|SNW1|EP300|NEURL1|NEURL1B|HES5|MIB1|HEYL|TBL1X|ADAM10|SKP1|ADAM17|HEY1|ITCH|HEY2|RBX1|PSEN1|MAMLD1|HDAC6|APH1A|APH1B|UBA52|TBL1XR1|CDK8|NCSTN|ARRB1|ARRB2|CUL1|NCOR2|UBB|NCOR1|UBC|NUMB|RPS27A|HES1|HDAC4|CREBBP|HDAC5|NBEA|JAG2|DLL4|JAG1|NOTCH1|DLL1|RBPJ|HDAC8|DNER|HDAC9|HDAC7|PSENEN|DTX4|KAT2B|CCNC|TLE4|KAT2A|HDAC3|TLE2|PSEN2|HIF1A|TLE1|DTX1|DTX2|DLK1|HDAC2|MAML2|MAML1|HDAC1|MYC|HDAC10|HDAC11…
PLASMA LIPOPROTEIN CLEARANCE%REACTOME%R-HSA-8964043.1	23	0.6558326	1.9162261	5.9988E-4	0.006881872	0.266						12	NOTCH3 Activation and Transmission of Signal to the Nucleus	25	0.0088	1.8725	0.002	RPS27A|NEURL1|TACC3|NOTCH3|YBX1|NEURL1B|JAG2|DLL4|JAG1|WWP2|DLL1|MIB1|ADAM10|PSENEN|PSEN2|EGF|PSEN1|EGFR|APH1A|APH1B|UBA52|NCSTN|MIB2|UBB|UBC
DISEASES ASSOCIATED WITH THE TLR SIGNALING CASCADE%REACTOME%R-HSA-5602358.1	24	0.6449482	1.9139324	0.0011829654	0.006952675	0.2729						8	p130Cas linkage to MAPK signaling for integrins	15	0.0094	1.8656	0.0014	TLN1|FGG|ITGB3|ITGA2B|CRK|RAP1B|RAP1A|PTK2|BCAR1|FN1|FGB|FGA|APBB1IP|VWF|SRC
TOLL LIKE RECEPTOR TLR1:TLR2 CASCADE%REACTOME%R-HSA-168179.1	90	0.48860314	1.9094929	0.0	0.0072852727	0.2881						20	Signaling by ERBB4	54	0.0097	1.8623	0.0006	TAB2|YAP1|CXCL12|ADAM17|ITCH|PSEN1|APH1A|APH1B|DLG4|UBA52|NCSTN|S100B|SPARC|ESR1|UBB|NCOR1|UBC|STAT5A|RPS27A|PGR|HRAS|CSN2|STMN1|ADAP1|MXD4|NRAS|WWOX|WWP1|PSENEN|SOS1|PSEN2|EGF|SHC1|NRG1|NRG2|PIK3R1|GFAP|EREG|EGFR|BTC|PIK3CA|NRG3|NRG4|HBEGF|GABRB3|GABRB2|GABRB1|GABRG3|GABRG2|APOE|NEDD4|GABRQ|GABRA1|SRC
TOLL LIKE RECEPTOR 2 (TLR2) CASCADE%REACTOME%R-HSA-181438.1	90	0.48860314	1.9087924	0.0	0.007231805	0.2907						4	RHO GTPases Activate WASPs and WAVEs	35	0.0117	1.8339	0.0012	WASL|ACTB|ACTG1|ABL1|PTK2|CYFIP2|CYFIP1|NCKAP1|WIPF1|WIPF2|WIPF3|BTK|WAS|BRK1|NCKIPSD|NCKAP1L|WASF1|WASF2|WASF3|BAIAP2|ARPC4|ABI2|ARPC5|ABI1|ARPC2|ARPC3|NCK1|ACTR3|ACTR2|CDC42|RAC1|ARPC1B|ARPC1A|MAPK1|MAPK3
MYD88:MAL(TIRAP) CASCADE INITIATED ON PLASMA MEMBRANE%REACTOME%R-HSA-166058.3	90	0.48860314	1.9082046	0.0	0.007157421	0.2922						13	Transmission across Chemical Synapses	238	0.0127	1.823	0.0002	AKAP5|ARHGEF9|PRKCB|CAMK2B|CAMK2D|CAMK2A|KCNJ4|KCNJ12|KCNJ2|CAMK2G|ALDH2|SLC6A13|SLC6A12|SLC6A11|GRIN1|SLC22A2|SLC22A1|CHRNA2|CHRNB3|CHRNA5|CHRNA4|CHRNA7|BCHE|CHRNA6|STX1A|GLS2|CHRNA9|CHRND|CHRNG|CHRNE|CHRNB2|CHRNA1|CHRNB4|CHRNA3|SLC6A1|SLC18A2|SLC32A1|BZRAP1|HSPA8|CACNA2D2|GABRB3|GABRB2|GABRB1|GRIA2|SLC17A7|GABRR3|GABRR2|GABRR1|NPTN|GABRG3|GABRG2|KCNJ3|PRKCA|GABRA2|GABRQ|KCNJ5|GABBR2|GABRA1|KCNJ…
TRANSCRIPTIONAL REGULATION OF GRANULOPOIESIS%REACTOME%R-HSA-9616222.2	29	0.61067843	1.907188	4.0217172E-4	0.0071463254	0.2959						8	GRB2:SOS provides linkage to MAPK signaling for Integrins	14	0.0132	1.812	0.002	TLN1|FGG|ITGB3|ITGA2B|RAP1B|RAP1A|PTK2|FN1|FGB|FGA|APBB1IP|SOS1|VWF|SRC
PLATELET AGGREGATION (PLUG FORMATION)%REACTOME%R-HSA-76009.2	22	0.6525547	1.9047163	8.108656E-4	0.0072402456	0.3035						9	Glucagon signaling in metabolic regulation	33	0.0133	1.812	0.0024	GNB2|GNB1|GNB4|GNB3|GCG|ADCY4|ADCY3|ADCY2|ADCY1|ADCY8|ADCY7|ADCY6|ADCY5|ADCY9|PRKAR1B|PRKAR1A|GNG3|CYSLTR2|GNG2|GNG5|PRKAR2B|GNG4|GNG7|PRKAR2A|GNG8|GNAS|GNG10|PRKACG|PRKACA|GNG12|GNG11|GNG13|PRKACB
ADVANCED GLYCOSYLATION ENDPRODUCT RECEPTOR SIGNALING%REACTOME%R-HSA-879415.1	12	0.7631008	1.9031299	2.0433184E-4	0.0072736973	0.3092						13	Neurotransmitter receptors and postsynaptic signal transmission	176	0.0139	1.8049	0.0006	AKAP5|NSF|GRIN2B|ARHGEF9|GRIA1|CACNG8|PDPK1|ADCY4|CACNG2|ADCY3|CACNG3|ADCY2|CACNG4|ADCY1|ADCY8|ADCY7|ADCY6|ADCY5|PRKCB|RPS6KA3|RPS6KA6|ADCY9|RPS6KA2|CAMK2B|PRKAR1B|RPS6KA1|CAMK2D|PRKAR1A|CAMK2A|PRKAR2B|PRKAR2A|KCNJ4|KCNJ12|KCNJ2|CAMK2G|GRIA3|GRIA4|MDM2|PICK1|HRAS|PLCB3|GRIN1|PLCB1|PLCB2|NRAS|CHRNA2|CHRNB3|CHRNA5|CHRNA4|CHRNA7|CHRNA6|CHRNA9|CHRND|CHRNG|CHRNE|CHRNB2|PRKAA1|CHRNA1|CREB1|CHRNB4|CHRNA…
SLC-MEDIATED TRANSMEMBRANE TRANSPORT%REACTOME DATABASE ID RELEASE 73%425407	124	0.46682268	1.9021446	0.0	0.007269137	0.3128						2	DAG and IP3 signaling	40	0.0175	1.7778	0.0036	PDE1C|CAMKK1|CAMKK2|ADRBK1|KPNA2|PRKCG|PRKCE|NBEA|ADCY4|ADCY3|ADCY2|ADCY1|ADCY8|ADCY7|ADCY6|ADCY5|CREB1|CAMK4|ADCY9|PRKAR1B|CAMK2B|CAMK2D|PRKX|PRKAR1A|PLCG1|CAMK2A|PRKAR2B|PRKAR2A|CAMK2G|PRKACG|PDE1B|PRKCD|PDE1A|PRKCA|PRKACA|ITPR1|ITPR2|ITPR3|PRKACB|AHCYL1
VASOPRESSIN REGULATES RENAL WATER HOMEOSTASIS VIA AQUAPORINS%REACTOME%R-HSA-432040.2	25	0.62930065	1.9004582	4.031445E-4	0.0072936774	0.3173						18	Response to elevated platelet cytosolic Ca2+	129	0.0176	1.7747	0.0004	CD9|CD109|APP|ISLR|CHID1|PRKCB|SERPINF2|GTPBP2|SYTL4|TLN1|NHLRC2|VCL|ENDOD1|ITGB3|A1BG|ITGA2B|CYB5R1|VTI1B|F8|APOOL|SPARC|HRG|PFN1|FERMT3|SERPINA3|SERPINA4|TMSB4X|CAP1|TIMP3|FLNA|ANXA5|FN1|PPBP|APOA1|PCYOX1L|FAM49B|LAMP2|SCCPDH|WDR1|CFD|SCG3|CLU|PHACTR2|ITIH4|ITIH3|TTN|TGFB1|CLEC3B|ACTN2|CDC37L1|EGF|IGF2|IGF1|CALU|PCDH7|SERPINA1|SERPINE1|HABP4|PDGFB|QSOX1|AHSG|ACTN1|ACTN4|SEPP1|HGF|GAS6|PRKCA|TAG…
NEURONAL SYSTEM%REACTOME DATABASE ID RELEASE 73%112316	151	0.4524797	1.8973149	0.0	0.0074876286	0.3283						2	Opioid Signalling	89	0.0178	1.7727	0.0008	ADCY4|ADCY3|ADCY2|ADCY1|ADCY8|ADCY7|ADCY6|ADCY5|CAMK4|GNAL|PPP1CA|PDYN|ADCY9|CAMK2B|GNAT2|PRKAR1B|CAMK2D|GNAT3|PRKAR1A|CAMK2A|GNAT1|PRKAR2B|PPP3R1|PRKAR2A|OPRM1|CDK5|PLA2G4A|PPP3CC|CAMK2G|PPP3CB|GNAZ|GNG10|PDE1B|PDE1A|ITPR1|GNG12|ITPR2|GNG11|ITPR3|GNG13|GNAO1|AHCYL1|GNB2|GNB1|POMC|PLCB3|GNB4|PPP2CA|PLCB4|PPP2CB|GNB3|PPP2R1B|PLCB1|PPP2R1A|PLCB2|PDE1C|GNB5|CAMKK1|CAMKK2|ADRBK1|GNGT1|KPNA2|PRKCG|GNG…
NOTCH-HLH TRANSCRIPTION PATHWAY%REACTOME%R-HSA-350054.3	26	0.626163	1.8968184	2.0145044E-4	0.007432415	0.33						11	Nuclear Events (kinase and transcription factor activation)	61	0.0204	1.7527	0.0016	DUSP4|SH3GL3|ARC|F3|TRIB1|RRAD|JUND|EP300|EGR3|EGR4|FOSL1|ID2|ID4|ID3|LYL1|SGK1|ASCL1|TPH1|FOSB|CDK5R2|EGR1|CDK5R1|RPS6KA3|RPS6KA5|RPS6KA2|MEF2A|RPS6KA1|EGR2|CDK5|ATF1|FOS|TCF12|DNM2|PPP2CA|PPP2CB|CHD4|PPP2R1B|PPP2R1A|MEF2D|NAB1|NAB2|SRF|ATF2|ELK1|CREB1|MEF2C|MAPK14|MAPK11|ID1|REST|VGF|JUNB|DUSP3|PPP2R5D|VRK3|DUSP6|DUSP7|MAPK7|MAPKAPK2|MAPK1|MAPK3
TOLL LIKE RECEPTOR TLR6:TLR2 CASCADE%REACTOME%R-HSA-168188.1	90	0.48860314	1.8961638	0.0	0.0073780743	0.3322						18	Platelet degranulation	124	0.022	1.7407	0.0014	CD9|CD109|APP|ISLR|CHID1|SERPINF2|GTPBP2|SYTL4|TLN1|NHLRC2|VCL|ENDOD1|ITGB3|A1BG|ITGA2B|CYB5R1|VTI1B|F8|APOOL|SPARC|HRG|PFN1|FERMT3|SERPINA3|SERPINA4|TMSB4X|CAP1|TIMP3|FLNA|ANXA5|FN1|PPBP|APOA1|PCYOX1L|FAM49B|LAMP2|SCCPDH|WDR1|CFD|SCG3|CLU|PHACTR2|ITIH4|ITIH3|TTN|TGFB1|CLEC3B|ACTN2|CDC37L1|EGF|IGF2|IGF1|CALU|PCDH7|SERPINA1|SERPINE1|HABP4|PDGFB|QSOX1|AHSG|ACTN1|ACTN4|SEPP1|HGF|GAS6|TAGLN2|A2M|VEGF…
CALMODULIN INDUCED EVENTS%REACTOME%R-HSA-111933.1	22	0.65008765	1.8953569	0.0012162984	0.007340674	0.334						1	Signaling by BRAF and RAF fusions	61	0.0272	1.7051	0.0022	KIAA1549|MPRIP|TRIM24|AGTRAP|AP3B1|SND1|PAPD7|ESRP1|KDM7A|FAM114A2|ZC3HAV1|TRAK1|FXR1|LMNA|QKI|CLCN6|FAM131B|AGGF1|FGB|BCL2L11|FGA|APBB1IP|VWF|CNKSR1|RAF1|TLN1|PAPSS1|VCL|FGG|CAMK2B|CAMK2D|ITGB3|ITGA2B|CAMK2A|ARAF|PEBP1|ARRB1|IQGAP1|ARRB2|RAP1B|RAP1A|CSK|CAMK2G|MARK3|MAP2K1|MAP2K2|KSR1|FN1|BRAF|KSR2|CNKSR2|HRAS|NRAS|AKAP9|JAK2|AGK|ATG7|YWHAB|MAPK1|SRC|MAPK3
TBC RABGAPS%REACTOME DATABASE ID RELEASE 73%8854214	41	0.56329143	1.8935418	4.0209087E-4	0.007421788	0.3404						7	ADORA2B mediated anti-inflammatory cytokines production	133	0.0275	1.7029	0.0031	ADORA2B|P2RY11|ADCY4|ADCY3|ADCY2|ADCY1|RXFP1|ADCY8|RXFP2|ADCY7|ADCY6|ADCY5|FSHB|ADCY9|PRKAR1B|PRKAR1A|PRKAR2B|PTGIR|GLP1R|PRKAR2A|MC2R|GPR15|GNAS|GPR27|GPR25|GPR20|PTH1R|GPR32|PTH2R|GPR45|AVPR2|TSHB|GPR83|MC1R|PTH2|FSHR|AVP|PTHLH|GPR176|GIP|MC4R|IL6|GPR150|GPHA2|CRH|GPHB5|PTGER2|LHCGR|CRHR1|PTGDR|PTGER4|GPBAR1|PTH|TSHR|MC3R|NPSR1|CREB1|GPR84|NPS|CYSLTR2|MC5R|PRKACG|CRHR2|PRKACA|PRKACB|ADCYAP1|ADC…
G-PROTEIN MEDIATED EVENTS%REACTOME%R-HSA-112040.1	36	0.5820283	1.8934652	1.9428793E-4	0.0073210215	0.3406						1	Oncogenic MAPK signaling	79	0.0294	1.6925	0.0023	KIAA1549|MPRIP|TRIM24|AGTRAP|AP3B1|SND1|PAPD7|ESRP1|KDM7A|FAM114A2|ZC3HAV1|TRAK1|FXR1|LMNA|QKI|CLCN6|FAM131B|AGGF1|FGB|BCL2L11|FGA|APBB1IP|VWF|CNKSR1|KRAS|RAF1|TLN1|PAPSS1|MAP3K11|VCL|FGG|CAMK2B|CAMK2D|ITGB3|ITGA2B|CAMK2A|ARAF|PEBP1|ARRB1|PHB|IQGAP1|ARRB2|RAP1B|RAP1A|CSK|CAMK2G|MARK3|BRAP|MAP2K1|MAP2K2|KSR1|FN1|BRAF|KSR2|CNKSR2|SPRED3|SPRED2|SPRED1|HRAS|NRAS|AKAP9|NF1|JAK2|AGK|PPP1CB|PPP1CC|ATG7|…
PLC BETA MEDIATED EVENTS%REACTOME%R-HSA-112043.1	36	0.5820283	1.8924297	1.9829467E-4	0.0073182504	0.3442						23	O-linked glycosylation	108	0.0356	1.6673	0.004	ST6GALNAC4|MUC20|GALNT11|ADAMTS14|GALNT14|GALNT13|GALNT16|GALNT15|GALNT18|GALNT10|POFUT2|ST3GAL4|WBSCR17|GYLTL1B|B3GALNT2|DAG1|ST3GAL1|GALNTL5|GALNTL6|ST3GAL2|B3GNTL1|ST3GAL3|GALNT9|GALNT8|POMGNT2|B3GNT9|B3GNT8|B3GNT6|B3GNT5|CHST4|GCNT1|GCNT3|GCNT4|GCNT7|GALNT7|GALNT6|GALNT5|GALNT4|GALNT2|A4GNT|POMK|ADAMTS2|ADAMTS3|B4GALT6|B4GALT5|GALNT12|SEMA5B|SPON2|SPON1|THSD7B|ADAMTSL1|ADAMTSL4|ADAMTSL3|ADAMT…
CAM PATHWAY%REACTOME%R-HSA-111997.1	22	0.65008765	1.8910356	9.978048E-4	0.007339809	0.349						16	Oxidative Stress Induced Senescence	123	0.0382	1.6567	0.0042	TNRC6C|JUN|SUZ12|BMI1|MAPK8|MAP2K6|UBA52|RING1|FOS|CDKN2A|UBB|MDM2|MDM4|UBC|RPS27A|E2F1|E2F2|E2F3|CDKN2D|CDKN2B|CDKN2C|TFDP1|TFDP2|CDK4|RNF2|MAPKAPK5|IFNB1|MAPK14|MAPK11|MAPKAPK2|MAPK1|MAPK3|TXN|HIST1H2AE|HIST1H2AD|HIST3H2BB|HIST1H2AC|HIST1H2AB|HIST1H2AJ|PHC2|HIST2H3A|HIST1H2BF|HIST1H2BE|PHC1|HIST1H2BH|HIST1H2BG|HIST1H2BB|HIST2H3D|HIST1H2BA|HIST2H3C|HIST1H2BD|HIST1H2BC|PHC3|H2AFB1|KDM6B|HIST1H3J|…
FCGR ACTIVATION%REACTOME DATABASE ID RELEASE 73%2029481	16	0.70599335	1.8893058	0.0012391574	0.0074400282	0.3563						17	Peptide ligand-binding receptors	195	0.0405	1.6466	0.0048	NPFFR2|APP|OXTR|NPFFR1|RXFP4|GRPR|RXFP1|RXFP2|RXFP3|EDNRA|EDNRB|C3AR1|PROK2|PROK1|UTS2R|NPFF|GPR37L1|PDYN|TRHR|UTS2B|KEL|AGTR1|AGTR2|FPR1|FPR3|FPR2|NLN|MC2R|C5|GALR3|GALR2|GALR1|NPBWR1|PENK|NPBWR2|PPY|HCRT|NTSR1|CCR10|NTSR2|CCR1|NMB|XCR1|PPBP|NMBR|MC1R|NMS|PNOC|NMU|QRFP|CX3CL1|MLN|BRS3|MC4R|CCKAR|CCR9|CCR8|CCR7|CCR5|CCR4|CCR3|EDN1|EDN2|GPR37|ANXA1|EDN3|TACR2|TACR3|TACR1|MC3R|GAL|CCKBR|OPRD1|CCR6|…
SIGNALING BY NOTCH1%REACTOME DATABASE ID RELEASE 73%1980143	59	0.5204834	1.8783393	3.867724E-4	0.008484428	0.3991						17	GPCR ligand binding	454	0.043	1.6392	0.0008	P2RY14|P2RY4|ADORA2B|ADORA3|ADORA1|S1PR1|FSHB|PTH1R|PTH2R|FZD5|PTH2|FZD4|FSHR|WNT3A|FZD6|FZD8|PTHLH|GPHA2|GPHB5|LHCGR|CRHR1|GPBAR1|PTH|TSHR|WNT1|CYSLTR2|OPN4|OPN1SW|OPN3|OPN1MW|OPN1LW|OPN1MW2|RRH|RGR|OPN5|GABBR2|GABBR1|VIPR1|VIPR2|GIPR|SCT|GHRHR|GLP2R|SCTR|GHRH|VIP|CD55|HCAR2|HCAR3|HCAR1|WNT10B|LHB|FZD7|WNT5A|IAPP|WNT10A|WNT7B|WNT11|WNT9B|WNT7A|WNT16|WNT2B|CHRM2|WNT6|CHRM3|CHRM1|WNT2|CHRM4|CRHBP|…
NOTCH4 INTRACELLULAR DOMAIN REGULATES TRANSCRIPTION%REACTOME DATABASE ID RELEASE 73%9013695	14	0.7250858	1.8771238	0.00159968	0.00849277	0.4036						17	Class A 1 (Rhodopsin-like receptors)	323	0.0603	1.5642	0.0032	P2RY14|P2RY4|ADORA2B|ADORA3|ADORA1|S1PR1|NPFFR2|APP|OXTR|NPFFR1|RXFP4|GRPR|RXFP1|RXFP2|RXFP3|EDNRA|EDNRB|C3AR1|PROK2|PROK1|UTS2R|NPFF|GPR37L1|PDYN|FSHB|TRHR|UTS2B|KEL|AGTR1|AGTR2|FPR1|FPR3|FPR2|NLN|MC2R|C5|GALR3|GALR2|GALR1|NPBWR1|PENK|NPBWR2|PPY|HCRT|NTSR1|CCR10|NTSR2|CCR1|NMB|XCR1|PPBP|TSHB|NMBR|MC1R|NMS|PNOC|FSHR|NMU|QRFP|CX3CL1|MLN|BRS3|MC4R|CCKAR|CCR9|PTGFR|CCR8|GPHA2|PTGER1|CCR7|PTGDR2|CCR5…
VEGFR2 MEDIATED VASCULAR PERMEABILITY%REACTOME DATABASE ID RELEASE 73%5218920	22	0.6448676	1.8770603	0.0018296401	0.008393808	0.4041						6	RNA Polymerase III Transcription	40	0.05	-1.7336	0.0039	POLR2K|POLR2L|SNAPC5|SNAPC1|SNAPC2|SNAPC3|SNAPC4|BDP1|GTF3C1|GTF3C2|GTF3C3|GTF3C4|GTF3C5|TBP|ZNF143|GTF3C6|POU2F1|BRF2|BRF1|GTF3A|CRCP|POLR1C|NFIX|SSB|POLR3GL|NFIA|NFIB|POLR3A|NFIC|POLR3B|POLR3C|POLR3D|POLR3E|POLR3F|POLR3G|POLR3H|POLR3K|POLR2E|POLR2F|POLR2H
NOTCH3 ACTIVATION AND TRANSMISSION OF SIGNAL TO THE NUCLEUS%REACTOME DATABASE ID RELEASE 73%9013507	19	0.6669417	1.8725148	0.0019952115	0.008797259	0.4217						6	RNA Polymerase III Abortive And Retractive Initiation	40	0.0511	-1.7343	0.0024	POLR2K|POLR2L|SNAPC5|SNAPC1|SNAPC2|SNAPC3|SNAPC4|BDP1|GTF3C1|GTF3C2|GTF3C3|GTF3C4|GTF3C5|TBP|ZNF143|GTF3C6|POU2F1|BRF2|BRF1|GTF3A|CRCP|POLR1C|NFIX|SSB|POLR3GL|NFIA|NFIB|POLR3A|NFIC|POLR3B|POLR3C|POLR3D|POLR3E|POLR3F|POLR3G|POLR3H|POLR3K|POLR2E|POLR2F|POLR2H
REGULATION OF SIGNALING BY CBL%REACTOME DATABASE ID RELEASE 73%912631	16	0.6955842	1.8701992	0.0010046213	0.008946769	0.4319						15	Complex I biogenesis	55	0.0405	-1.7877	0.001	NDUFC2|NDUFC1|NDUFA13|NDUFA11|NDUFA12|NDUFA10|NDUFB9|NDUFB8|NDUFB7|NDUFB6|NDUFB5|ACAD9|NDUFB4|NDUFB3|NDUFAB1|NDUFB2|NDUFB1|NUBPL|ECSIT|NDUFA9|NDUFA8|NDUFA7|NDUFA6|NDUFA5|NDUFA3|NDUFB10|NDUFA2|NDUFB11|NDUFA1|NDUFV3|NDUFV2|NDUFV1|TIMMDC1|MT-ND6|MT-ND4|MT-ND5|MT-ND2|MT-ND3|MT-ND1|NDUFAF6|NDUFS8|NDUFAF7|NDUFS7|NDUFAF4|NDUFS6|NDUFAF5|NDUFAF2|NDUFAF3|NDUFS5|NDUFAF1|NDUFS4|NDUFS3|NDUFS2|NDUFS1|TMEM126B
P130CAS LINKAGE TO MAPK SIGNALING FOR INTEGRINS%REACTOME%R-HSA-372708.1	10	0.78914773	1.8655667	0.0014141414	0.009359048	0.451						15	Respiratory electron transport, ATP synthesis by chemiosmotic coupling, and heat production by uncoupling proteins.	124	0.0273	-1.8343	0	NDUFC2|SURF1|NDUFC1|UQCR11|UQCRQ|UQCR10|NDUFA13|NDUFA11|COX7B|NDUFA12|SLC25A14|NDUFA10|MT-CYB|NDUFB9|COX7C|COX8A|NDUFB8|ETFA|NDUFB7|ETFB|NDUFB6|NDUFB5|ATP5J2|NDUFB4|COX5B|NDUFB3|COX5A|NDUFB2|NDUFB1|SLC25A27|COX6C|NDUFA9|TACO1|NDUFA8|NDUFA7|COX6A1|NDUFA6|NDUFA5|ATP5G3|NDUFA3|ATP5G2|NDUFA2|COX6B1|ATP5G1|NDUFA1|COX16|COX18|ATP5F1|COX11|COX14|COQ10B|COQ10A|ETFDH|CYCS|COX20|TIMMDC1|ATP5S|MT-ND6|MT-ND4…
SIGNALING BY ERBB4%REACTOME%R-HSA-1236394.4	35	0.5720084	1.8623391	6.037432E-4	0.009656099	0.4659						6	RNA Polymerase III Transcription Initiation From Type 3 Promoter	27	0.028	-1.8361	0.0014	POLR2K|POLR2L|SNAPC5|SNAPC1|SNAPC2|SNAPC3|SNAPC4|BDP1|TBP|ZNF143|POU2F1|BRF2|CRCP|POLR1C|POLR3GL|POLR3A|POLR3B|POLR3C|POLR3D|POLR3E|POLR3F|POLR3G|POLR3H|POLR3K|POLR2E|POLR2F|POLR2H
BMAL1:CLOCK,NPAS2 ACTIVATES CIRCADIAN GENE EXPRESSION%REACTOME DATABASE ID RELEASE 73%1368108	20	0.653014	1.8618703	0.0019845208	0.009604145	0.4683						6	RNA Polymerase III Transcription Initiation	35	0.0266	-1.8437	0.0016	POLR2K|POLR2L|SNAPC5|SNAPC1|SNAPC2|SNAPC3|SNAPC4|BDP1|GTF3C1|GTF3C2|GTF3C3|GTF3C4|GTF3C5|TBP|ZNF143|GTF3C6|POU2F1|BRF2|BRF1|GTF3A|CRCP|POLR1C|POLR3GL|POLR3A|POLR3B|POLR3C|POLR3D|POLR3E|POLR3F|POLR3G|POLR3H|POLR3K|POLR2E|POLR2F|POLR2H
INTEGRATION OF ENERGY METABOLISM%REACTOME%R-HSA-163685.1	66	0.50588226	1.860531	1.9936204E-4	0.009674751	0.4754						15	Respiratory electron transport	100	0.0214	-1.8645	0	NDUFC2|SURF1|NDUFC1|UQCR11|UQCRQ|UQCR10|NDUFA13|NDUFA11|COX7B|NDUFA12|NDUFA10|MT-CYB|NDUFB9|COX7C|COX8A|NDUFB8|ETFA|NDUFB7|ETFB|NDUFB6|NDUFB5|NDUFB4|COX5B|NDUFB3|COX5A|NDUFB2|NDUFB1|COX6C|NDUFA9|TACO1|NDUFA8|NDUFA7|COX6A1|NDUFA6|NDUFA5|NDUFA3|NDUFA2|COX6B1|NDUFA1|COX16|COX18|COX11|COX14|COQ10B|COQ10A|ETFDH|CYCS|COX20|TIMMDC1|MT-ND6|MT-ND4|MT-ND5|MT-ND2|MT-ND3|MT-ND1|NDUFAF6|NDUFAF7|NDUFAF4|NDUFAF…
ABERRANT REGULATION OF MITOTIC G1 S TRANSITION IN CANCER DUE TO RB1 DEFECTS%REACTOME%R-HSA-9659787.1	15	0.700956	1.8511753	0.0018389865	0.01073057	0.5155						21	tRNA processing in the nucleus	54	0.0093	-1.9517	0	RAN|POM121|NUP205|AAAS|NUP160|NUP85|TPR|NUP88|CPSF4|CPSF1|NUP155|CSTF2|NUP153|POP5|POP7|POP1|CLP1|TSEN15|POP4|RTCB|ZBTB8OS|TSEN2|TSEN54|C14ORF166|TSEN34|DDX1|C2ORF49|XPOT|FAM98B|NUP62|NDC1|SEC13|NUP133|NUP50|NUP54|NUP43|RAE1|RANBP2|RPP30|RPP38|RPP21|RPP25|NUP35|RPP40|ELAC2|NUPL2|TRNT1|NUP37|NUP107|NUP188|RPP14|NUP214|NUP210|NUP93
TRANSPORT OF BILE SALTS AND ORGANIC ACIDS, METAL IONS AND AMINE COMPOUNDS%REACTOME%R-HSA-425366.3	40	0.55313295	1.8499403	5.807201E-4	0.01077378	0.5214						14	rRNA processing in the nucleus and cytosol	193	0.0039	-2.0149	0	UBA52|RCL1|TBL3|MPHOSPH10|RPS27A|NOL11|NOP10|DDX49|DDX47|WDR3|FCF1|NAT10|THUMPD1|PWP2|WDR46|CSNK1E|WDR43|RRP9|RPS14|TRMT112|FBL|UTP14A|UTP14C|UTP15|WDR36|RPS9|RPS7|IMP3|DIMT1|RPS6|WDR75|IMP4|DDX52|UTP11L|UTP18|DIEXF|CIRH1A|NHP2L1|DKC1|NHP2|EXOSC7|HEATR1|EXOSC6|NOP2|EXOSC5|TSR3|EXOSC4|NOC4L|EXOSC9|NOL6|EXOSC8|RRP7A|EXOSC3|EMG1|EXOSC2|PDCD11|EXOSC1|BMS1|GAR1|DHX37|WBSCR22|RRP36|UTP20|RPS2|NOP14|NOP…
DEFECTIVE BINDING OF RB1 MUTANTS TO E2F1,(E2F2, E2F3)%REACTOME DATABASE ID RELEASE 73%9661069	15	0.700956	1.8477389	0.0020329335	0.010924391	0.5321							rRNA modification in the nucleus and cytosol	60	0.0039	-2.0215	0	RCL1|TBL3|MPHOSPH10|NOL11|NOP10|DDX49|DDX47|WDR3|FCF1|NAT10|THUMPD1|PWP2|WDR46|WDR43|RRP9|RPS14|TRMT112|FBL|UTP14A|UTP14C|UTP15|WDR36|RPS9|RPS7|IMP3|DIMT1|RPS6|WDR75|IMP4|DDX52|UTP11L|UTP18|DIEXF|CIRH1A|NHP2L1|DKC1|NHP2|DCAF13|HEATR1|NOP2|TSR3|NOC4L|NOL6|RRP7A|EMG1|PDCD11|BMS1|GAR1|DHX37|WBSCR22|RRP36|UTP20|NOP56|RPS2|NOP14|NOP58|UTP6|KRR1|UTP3|PNO1
GLUCAGON-LIKE PEPTIDE-1 (GLP1) REGULATES INSULIN SECRETION%REACTOME%R-HSA-381676.2	23	0.62881845	1.8471878	0.0013831259	0.010864575	0.5342						14	rRNA processing	203	0.0044	-2.0229	0	UBA52|RCL1|TBL3|MPHOSPH10|RPS27A|NOL11|NOP10|DDX49|DDX47|WDR3|FCF1|NAT10|THUMPD1|PWP2|WDR46|CSNK1E|WDR43|RRP9|RPS14|TRMT112|FBL|UTP14A|UTP14C|UTP15|WDR36|RPS9|RPS7|IMP3|DIMT1|RPS6|WDR75|IMP4|DDX52|UTP11L|UTP18|DIEXF|CIRH1A|NHP2L1|DKC1|NHP2|EXOSC7|HEATR1|EXOSC6|NOP2|EXOSC5|TSR3|EXOSC4|NOC4L|EXOSC9|NOL6|EXOSC8|RRP7A|EXOSC3|EMG1|EXOSC2|PDCD11|EXOSC1|BMS1|GAR1|DHX37|WBSCR22|RRP36|UTP20|RPS2|NOP14|NOP…
PLATELET HOMEOSTASIS%REACTOME%R-HSA-418346.2	54	0.5180079	1.8471249	3.9478877E-4	0.010751087	0.5345						14	Major pathway of rRNA processing in the nucleolus and cytosol	183	0.0028	-2.0501	0	RPL37A|RPL24|RPL27|RPL26|RPL29|RPL28|RPS4Y2|RPL10|RPL12|RPL11|RPL36A|RPS27L|RPS4Y1|RPS15A|RPS3|RPL14|RPL13|RPL15|RPL18|RPL17|RPL19|RPL39L|RPL41|RPL35A|RPL23A|RPL3L|RPS26|RPS25|RPS28|RPS27|UBA52|RCL1|TBL3|MPHOSPH10|LTV1|RPS27A|NOL11|RRP1|ERI1|DDX49|DDX47|LAS1L|WDR3|NOL12|FCF1|RIOK2|RIOK1|PWP2|CSNK1E|WDR46|TEX10|WDR43|GNL3|RRP9|NIP7|RPS14|NOL9|EXOSC10|FBL|PES1|UTP14A|RIOK3|UTP14C|WDR18|UTP15|WDR12|…
COLLAGEN DEGRADATION%REACTOME%R-HSA-1442490.3	16	0.6859492	1.8445351	0.0022564102	0.010924669	0.5446						21	tRNA processing	102	0	-2.2564	0	RAN|POM121|NUP205|AAAS|NUP160|NUP85|TPR|NUP88|NUP155|NUP153|POP5|POP7|POP1|TSEN15|POP4|RTCB|ZBTB8OS|TSEN2|TSEN54|C14ORF166|TSEN34|DDX1|C2ORF49|XPOT|FAM98B|NUP62|NDC1|SEC13|NUP133|NUP50|NUP54|TRMT112|NUP43|RAE1|RANBP2|RPP30|RPP38|TYW5|TYW3|TRMT5|TYW1|RPP21|TRMT12|RPP25|NUP35|LCMT2|RPP40|NUPL2|NUP37|NUP107|NUP188|RPP14|NUP214|TP53RK|NUP210|EPRS|ALKBH8|THG1L|TRMT44|PUS3|METTL1|CDKAL1|PUS7|QTRTD1|FTS…
TOLL LIKE RECEPTOR 5 (TLR5) CASCADE%REACTOME%R-HSA-168176.1	81	0.4813694	1.8398298	0.0	0.011443058	0.5666						5	Mitochondrial translation	93	0	-2.4025	0	DAP3|MRPS35|MRPS36|MRPS33|MRPL18|MRPS34|MRPL19|MRPL16|MRPS31|MRPL17|MRPL14|MRPS30|MRPL15|MRPL12|MRPL13|MRPL57|MRPL54|MRPL10|MRPL11|MRPL55|MRPL20|ICT1|GADD45GIP1|PTCD3|MRPL27|MRPL28|ERAL1|MRPL23|MRPL24|MRPL21|MRPL22|MRPL30|MRPS17|GFM1|MRPS15|MRPS16|MRPS14|MRPS11|MRPS12|GFM2|MRRF|MTRF1L|MRPL38|MRPL39|MRPS10|MTFMT|MRPL36|MTIF2|MRPL37|MTIF3|MRPL34|MRPL35|MRPL32|MRPL33|MRPL41|MRPL4|MRPL3|MRPL42|MRPL2|…
KERATAN SULFATE KERATIN METABOLISM%REACTOME%R-HSA-1638074.1	19	0.65260214	1.8377565	0.0034095468	0.011626159	0.5766						5	Mitochondrial translation termination	87	0	-2.4034	0	DAP3|MRPS35|MRPS36|MRPS33|MRPL18|MRPS34|MRPL19|MRPL16|MRPS31|MRPL17|MRPL14|MRPS30|MRPL15|MRPL12|MRPL13|MRPL57|MRPL54|MRPL10|MRPL11|MRPL55|MRPL20|ICT1|GADD45GIP1|PTCD3|MRPL27|MRPL28|ERAL1|MRPL23|MRPL24|MRPL21|MRPL22|MRPL30|MRPS17|MRPS15|MRPS16|MRPS14|MRPS11|MRPS12|GFM2|MRRF|MTRF1L|MRPL38|MRPL39|MRPS10|MRPL36|MRPL37|MRPL34|MRPL35|MRPL32|MRPL33|MRPL41|MRPL4|MRPL3|MRPL42|MRPL2|MRPL40|MRPL1|MRPL9|CHCH…
MYD88 CASCADE INITIATED ON PLASMA MEMBRANE%REACTOME%R-HSA-975871.1	81	0.4813694	1.8356166	0.0	0.011813673	0.5864						5	Mitochondrial translation initiation	87	0	-2.4057	0	DAP3|MRPS35|MRPS36|MRPS33|MRPL18|MRPS34|MRPL19|MRPL16|MRPS31|MRPL17|MRPL14|MRPS30|MRPL15|MRPL12|MRPL13|MRPL57|MRPL54|MRPL10|MRPL11|MRPL55|MRPL20|ICT1|GADD45GIP1|PTCD3|MRPL27|MRPL28|ERAL1|MRPL23|MRPL24|MRPL21|MRPL22|MRPL30|MRPS17|MRPS15|MRPS16|MRPS14|MRPS11|MRPS12|MRPL38|MRPL39|MRPS10|MTFMT|MRPL36|MTIF2|MRPL37|MTIF3|MRPL34|MRPL35|MRPL32|MRPL33|MRPL41|MRPL4|MRPL3|MRPL42|MRPL2|MRPL40|MRPL1|MRPL9|CHC…
TOLL LIKE RECEPTOR 10 (TLR10) CASCADE%REACTOME DATABASE ID RELEASE 73%168142	81	0.4813694	1.8351933	0.0	0.011758941	0.5887						5	Mitochondrial translation elongation	87	0	-2.4214	0	DAP3|MRPS35|MRPS36|MRPS33|MRPL18|MRPS34|MRPL19|MRPL16|MRPS31|MRPL17|MRPL14|MRPS30|MRPL15|MRPL12|MRPL13|MRPL57|MRPL54|MRPL10|MRPL11|MRPL55|MRPL20|ICT1|GADD45GIP1|PTCD3|MRPL27|MRPL28|ERAL1|MRPL23|MRPL24|MRPL21|MRPL22|MRPL30|MRPS17|GFM1|MRPS15|MRPS16|MRPS14|MRPS11|MRPS12|MRPL38|MRPL39|MRPS10|MRPL36|MRPL37|MRPL34|MRPL35|MRPL32|MRPL33|MRPL41|MRPL4|MRPL3|MRPL42|MRPL2|MRPL40|MRPL1|MRPL9|CHCHD1|MRPS28|TS…
RORA ACTIVATES GENE EXPRESSION%REACTOME%R-HSA-1368082.3	18	0.6639241	1.834165	0.0028694405	0.011781176	0.5934
RHO GTPASES ACTIVATE WASPS AND WAVES%REACTOME%R-HSA-5663213.1	32	0.5730822	1.8338996	0.0011769321	0.011687459	0.5944
REGULATION OF MECP2 EXPRESSION AND ACTIVITY%REACTOME DATABASE ID RELEASE 73%9022692	25	0.61260915	1.8338096	0.0020251113	0.011580159	0.5949
TRAF6 MEDIATED INDUCTION OF NFKB AND MAP KINASES UPON TLR7 8 OR 9 ACTIVATION%REACTOME%R-HSA-975138.2	85	0.47576183	1.8332202	0.0	0.011551738	0.5975
RECYCLING PATHWAY OF L1%REACTOME%R-HSA-437239.1	22	0.6239762	1.8306957	0.0020408162	0.011750222	0.609
COMPLEMENT CASCADE%REACTOME DATABASE ID RELEASE 73%166658	27	0.5963722	1.8236558	0.0021713383	0.012709253	0.6402
TRANSMISSION ACROSS CHEMICAL SYNAPSES%REACTOME DATABASE ID RELEASE 73%112315	106	0.4563347	1.8230048	1.942502E-4	0.01267635	0.6425
SIGNALING BY ERYTHROPOIETIN%REACTOME DATABASE ID RELEASE 73%9006335	22	0.62230194	1.819528	0.0027805362	0.01305273	0.656
TRANSCRIPTIONAL REGULATION BY MECP2%REACTOME%R-HSA-8986944.2	34	0.56617975	1.8185858	0.0017885533	0.013081155	0.6606
REGULATION OF COMPLEMENT CASCADE%REACTOME DATABASE ID RELEASE 73%977606	24	0.61090845	1.8179785	0.0031508468	0.013044636	0.6627
MYD88 DEPENDENT CASCADE INITIATED ON ENDOSOME%REACTOME DATABASE ID RELEASE 73%975155	86	0.47094062	1.817179	5.701254E-4	0.01305275	0.6658
INTERLEUKIN-15 SIGNALING%REACTOME%R-HSA-8983432.3	14	0.7014469	1.8137788	0.0039070533	0.013406432	0.6797
TOLL-LIKE RECEPTOR CASCADES%REACTOME DATABASE ID RELEASE 73%168898	134	0.43804902	1.8133959	0.0	0.013344537	0.6818
TOLL LIKE RECEPTOR 7 8 (TLR7 8) CASCADE%REACTOME%R-HSA-168181.2	86	0.47094062	1.8127171	1.914242E-4	0.013321384	0.6846
GLUCAGON SIGNALING IN METABOLIC REGULATION%REACTOME DATABASE ID RELEASE 73%163359	20	0.6424558	1.8120304	0.0024149728	0.013301882	0.6871
GRB2:SOS PROVIDES LINKAGE TO MAPK SIGNALING FOR INTEGRINS%REACTOME%R-HSA-354194.1	10	0.7648355	1.8119953	0.0020292208	0.013185536	0.6872
P75 NTR RECEPTOR-MEDIATED SIGNALLING%REACTOME DATABASE ID RELEASE 73%193704	76	0.47660002	1.8084538	1.9704434E-4	0.013598889	0.701
CELL-CELL COMMUNICATION%REACTOME DATABASE ID RELEASE 73%1500931	57	0.5018897	1.8049042	3.9077766E-4	0.014026269	0.7144
NEUROTRANSMITTER RECEPTORS AND POSTSYNAPTIC SIGNAL TRANSMISSION%REACTOME DATABASE ID RELEASE 73%112314	80	0.4728317	1.8048543	5.9020263E-4	0.013906651	0.7144
RHO GTPASES ACTIVATE PKNS%REACTOME%R-HSA-5625740.1	27	0.5871698	1.8044485	0.0029568302	0.013860095	0.7162
BINDING AND UPTAKE OF LIGANDS BY SCAVENGER RECEPTORS%REACTOME DATABASE ID RELEASE 73%2173782	26	0.58921874	1.8002511	0.003158934	0.014439306	0.7351
RET SIGNALING%REACTOME%R-HSA-8853659.4	25	0.5924257	1.7946184	0.002421796	0.015287252	0.7582
LIPOPROTEIN METABOLISM%REACTOME%R-HSA-174824.4	39	0.538269	1.7874192	0.0015958508	0.016446603	0.786
LDL CLEARANCE%REACTOME DATABASE ID RELEASE 73%8964038	15	0.6766679	1.7871164	0.004814443	0.01635778	0.7869
RUNX3 REGULATES NOTCH SIGNALING%REACTOME%R-HSA-8941856.1	13	0.704837	1.7854708	0.0036622584	0.016479984	0.7928
INTERLEUKIN-4 AND INTERLEUKIN-13 SIGNALING%REACTOME%R-HSA-6785807.5	71	0.4781727	1.783886	0.0	0.016621849	0.7989
SIGNALLING TO ERKS%REACTOME%R-HSA-187687.1	25	0.588104	1.7833973	0.0038453755	0.016548693	0.8006
DAG AND IP3 SIGNALING%REACTOME%R-HSA-1489509.2	28	0.5737411	1.7777691	0.0036180904	0.017468525	0.8218
N-GLYCAN ANTENNAE ELONGATION%REACTOME DATABASE ID RELEASE 73%975577	11	0.73273426	1.7762752	0.0052419356	0.017597038	0.8259
REGULATION OF GENE EXPRESSION IN LATE STAGE (BRANCHING MORPHOGENESIS) PANCREATIC BUD PRECURSOR CELLS%REACTOME%R-HSA-210744.2	11	0.7318122	1.7759163	0.005685279	0.01751144	0.8266
RESPONSE TO ELEVATED PLATELET CYTOSOLIC CA2+%REACTOME DATABASE ID RELEASE 73%76005	87	0.45841318	1.7747223	3.939334E-4	0.017578619	0.8301
OPIOID SIGNALLING%REACTOME DATABASE ID RELEASE 73%111885	60	0.48972347	1.7726699	7.786646E-4	0.017840257	0.8385
DEGRADATION OF THE EXTRACELLULAR MATRIX%REACTOME%R-HSA-1474228.4	48	0.5112803	1.771848	0.0011883541	0.01784316	0.8398
RHO GTPASES ACTIVATE PAKS%REACTOME%R-HSA-5627123.2	17	0.6474042	1.7716986	0.004855351	0.017732786	0.8405
CELL SURFACE INTERACTIONS AT THE VASCULAR WALL%REACTOME DATABASE ID RELEASE 73%202733	94	0.45347413	1.7685974	1.9234468E-4	0.01819671	0.8502
THROMBIN SIGNALLING THROUGH PROTEINASE ACTIVATED RECEPTORS (PARS)%REACTOME DATABASE ID RELEASE 73%456926	21	0.6211939	1.7673166	0.0056497175	0.018278642	0.8529
TOLL LIKE RECEPTOR 4 (TLR4) CASCADE%REACTOME DATABASE ID RELEASE 73%166016	116	0.4372273	1.7665701	1.9271536E-4	0.01829091	0.8552
ATF6 (ATF6-ALPHA) ACTIVATES CHAPERONES%REACTOME%R-HSA-381033.2	11	0.7258356	1.7654341	0.005152514	0.018360402	0.8587
ROLE OF LAT2 NTAL LAB ON CALCIUM MOBILIZATION%REACTOME DATABASE ID RELEASE 73%2730905	14	0.6769456	1.762328	0.0069021517	0.018819347	0.8668
CD209 (DC-SIGN) SIGNALING%REACTOME%R-HSA-5621575.1	17	0.64341223	1.759802	0.0044229995	0.019216856	0.8748
TGF-BETA RECEPTOR SIGNALING ACTIVATES SMADS%REACTOME DATABASE ID RELEASE 73%2173789	30	0.55879694	1.756881	0.0034336497	0.019671146	0.8826
NUCLEAR EVENTS (KINASE AND TRANSCRIPTION FACTOR ACTIVATION)%REACTOME DATABASE ID RELEASE 73%198725	44	0.5128842	1.7526709	0.0015904573	0.020403452	0.8939
TOLL LIKE RECEPTOR 9 (TLR9) CASCADE%REACTOME%R-HSA-168138.1	90	0.4509808	1.7484812	3.8857586E-4	0.021213172	0.9053
FOXO-MEDIATED TRANSCRIPTION OF CELL DEATH GENES%REACTOME DATABASE ID RELEASE 73%9614657	16	0.6509211	1.7471848	0.0045276806	0.02135551	0.9081
SIALIC ACID METABOLISM%REACTOME%R-HSA-4085001.2	27	0.5709779	1.7444515	0.0039674668	0.02180137	0.9149
CARGO RECOGNITION FOR CLATHRIN-MEDIATED ENDOCYTOSIS%REACTOME%R-HSA-8856825.2	77	0.45935357	1.7434725	3.891808E-4	0.021867177	0.9178
IRAK4 DEFICIENCY (TLR2 4)%REACTOME DATABASE ID RELEASE 73%5603041	11	0.7162602	1.7430857	0.009334415	0.021791235	0.9183
FOXO-MEDIATED TRANSCRIPTION%REACTOME DATABASE ID RELEASE 73%9614085	50	0.49692845	1.7428508	0.0015661707	0.021693002	0.9188
PLATELET DEGRANULATION%REACTOME%R-HSA-114608.3	83	0.45493767	1.7406778	0.0013505692	0.022037702	0.9233
RHO GTPASES ACTIVATE NADPH OXIDASES%REACTOME%R-HSA-5668599.6	21	0.6071489	1.740652	0.0070893257	0.021886019	0.9234
RHO GTPASES ACTIVATE CIT%REACTOME%R-HSA-5625900.2	17	0.6378583	1.738407	0.006423123	0.022232285	0.9278
L1CAM INTERACTIONS%REACTOME DATABASE ID RELEASE 73%373760	63	0.47421622	1.7364223	0.0017398028	0.022514086	0.9315
REGULATION OF BETA-CELL DEVELOPMENT%REACTOME%R-HSA-186712.2	15	0.65366113	1.7348171	0.0069302893	0.022719342	0.9336
LXRS REGULATE GENE EXPRESSION LINKED TO CHOLESTEROL TRANSPORT AND EFFLUX%REACTOME%R-HSA-9029569.1	28	0.56127226	1.7344172	0.0035763958	0.0226738	0.9346
PROLONGED ERK ACTIVATION EVENTS%REACTOME%R-HSA-169893.1	12	0.69476706	1.732129	0.008335028	0.023092786	0.9382
REGULATION OF LIPID METABOLISM BY PPARALPHA%REACTOME DATABASE ID RELEASE 73%400206	93	0.4428135	1.731592	5.8456743E-4	0.023067784	0.9394
NOTCH2 ACTIVATION AND TRANSMISSION OF SIGNAL TO THE NUCLEUS%REACTOME%R-HSA-2979096.1	16	0.64666027	1.7299838	0.0055412627	0.023276145	0.9431
MUSCLE CONTRACTION%REACTOME%R-HSA-397014.3	89	0.4449642	1.7274197	0.0	0.023754511	0.9468
GABA RECEPTOR ACTIVATION%REACTOME%R-HSA-977443.4	23	0.5888973	1.7251971	0.005047446	0.024099285	0.9498
ACTIVATED NOTCH1 TRANSMITS SIGNAL TO THE NUCLEUS%REACTOME DATABASE ID RELEASE 73%2122948	24	0.57885635	1.7212366	0.007725832	0.024941027	0.955
ONCOGENE INDUCED SENESCENCE%REACTOME DATABASE ID RELEASE 73%2559585	31	0.54373395	1.7206771	0.006442796	0.024898069	0.9557
CLASS B 2 (SECRETIN FAMILY RECEPTORS)%REACTOME DATABASE ID RELEASE 73%373080	29	0.54974234	1.7176572	0.005511811	0.025461	0.9604
FCERI MEDIATED CA+2 MOBILIZATION%REACTOME DATABASE ID RELEASE 73%2871809	28	0.5551994	1.7176026	0.006276971	0.025302367	0.9604
SIGNAL REGULATORY PROTEIN FAMILY INTERACTIONS%REACTOME%R-HSA-391160.2	10	0.7320252	1.7175219	0.008213141	0.025158254	0.9604
POST-TRANSLATIONAL PROTEIN PHOSPHORYLATION%REACTOME%R-HSA-8957275.1	46	0.4982762	1.7161381	0.0027333072	0.02533545	0.9625
SIGNALING BY MET%REACTOME DATABASE ID RELEASE 73%6806834	49	0.48994115	1.7109064	0.003506038	0.026555464	0.9693
SIGNALING BY TGF-BETA RECEPTOR COMPLEX%REACTOME%R-HSA-170834.1	66	0.46261954	1.707221	0.0015536997	0.027395304	0.9745
RAB REGULATION OF TRAFFICKING%REACTOME%R-HSA-9007101.3	110	0.42387348	1.706775	3.8827411E-4	0.027338553	0.9752
PPARA ACTIVATES GENE EXPRESSION%REACTOME%R-HSA-1989781.3	92	0.43694112	1.7066158	9.786651E-4	0.027205326	0.9752
REGULATION OF CHOLESTEROL BIOSYNTHESIS BY SREBP (SREBF)%REACTOME%R-HSA-1655829.2	52	0.48440772	1.705793	0.0037342766	0.027229052	0.9757
SIGNALING BY BRAF AND RAF FUSIONS%REACTOME%R-HSA-6802952.1	49	0.4897368	1.7051322	0.0021696251	0.027228089	0.9762
ROLE OF PHOSPHOLIPIDS IN PHAGOCYTOSIS%REACTOME DATABASE ID RELEASE 73%2029485	27	0.5537962	1.7037241	0.0081139915	0.027441425	0.9771
ADORA2B MEDIATED ANTI-INFLAMMATORY CYTOKINES PRODUCTION%REACTOME%R-HSA-9660821.1	46	0.4935829	1.702911	0.0031170854	0.027493544	0.9775
REGULATION OF TLR BY ENDOGENOUS LIGAND%REACTOME%R-HSA-5686938.3	10	0.7218822	1.7017978	0.010573404	0.02764402	0.979
LXR-MEDIATED SIGNALING%REACTOME%R-HSA-9024446.2	32	0.5340721	1.7006018	0.008482936	0.027835641	0.98
N-GLYCAN ANTENNAE ELONGATION IN THE MEDIAL TRANS-GOLGI%REACTOME%R-HSA-975576.1	17	0.61895645	1.6989625	0.011539992	0.028153678	0.9813
ACTIVATION OF GABAB RECEPTORS%REACTOME%R-HSA-991365.3	20	0.59365535	1.6970131	0.011540798	0.028548602	0.9828
G ALPHA (I) SIGNALLING EVENTS%REACTOME%R-HSA-418594.6	183	0.39421862	1.693784	0.0	0.029266246	0.9848
ONCOGENIC MAPK SIGNALING%REACTOME%R-HSA-6802957.5	64	0.46222615	1.6924955	0.0023224307	0.029418511	0.9857
AMYLOID FIBER FORMATION%REACTOME DATABASE ID RELEASE 73%977225	33	0.52408856	1.69192	0.0059713377	0.029413704	0.9857
DEPOLYMERISATION OF THE NUCLEAR LAMINA%REACTOME%R-HSA-4419969.1	12	0.68039966	1.6876873	0.014291465	0.030467264	0.9878
EPHA-MEDIATED GROWTH CONE COLLAPSE%REACTOME DATABASE ID RELEASE 73%3928663	11	0.69142956	1.6828936	0.011779041	0.031718023	0.9896
GABA B RECEPTOR ACTIVATION%REACTOME DATABASE ID RELEASE 73%977444	20	0.59365535	1.6809418	0.010986816	0.032126393	0.9903
EGFR DOWNREGULATION%REACTOME%R-HSA-182971.6	20	0.58890635	1.6765902	0.010687639	0.0332117	0.9917
PKA ACTIVATION IN GLUCAGON SIGNALLING%REACTOME DATABASE ID RELEASE 73%164378	11	0.6856007	1.6759784	0.016456725	0.03321376	0.9919
MYD88 DEFICIENCY (TLR2 4)%REACTOME%R-HSA-5602498.1	10	0.70281255	1.6693368	0.013458401	0.03512203	0.9943
O-LINKED GLYCOSYLATION%REACTOME%R-HSA-5173105.4	52	0.4720317	1.6673449	0.0039525693	0.03558035	0.9952
CA2+ PATHWAY%REACTOME DATABASE ID RELEASE 73%4086398	42	0.49430907	1.6655707	0.006846635	0.035974663	0.9955
SIGNALING BY NOTCH%REACTOME%R-HSA-157118.5	149	0.39471656	1.659387	3.784295E-4	0.037924647	0.9974
HDMS DEMETHYLATE HISTONES%REACTOME DATABASE ID RELEASE 73%3214842	21	0.5731086	1.6588527	0.014486922	0.037901673	0.9974
G ALPHA (12 13) SIGNALLING EVENTS%REACTOME%R-HSA-416482.4	53	0.46880308	1.6573163	0.0041849343	0.038220398	0.9976
OXIDATIVE STRESS INDUCED SENESCENCE%REACTOME%R-HSA-2559580.4	58	0.45994845	1.6566516	0.0041592396	0.038235035	0.9976
EXTRA-NUCLEAR ESTROGEN SIGNALING%REACTOME DATABASE ID RELEASE 73%9009391	50	0.4717764	1.6537764	0.0051282053	0.039055053	0.9983
HEPARAN SULFATE HEPARIN (HS-GAG) METABOLISM%REACTOME%R-HSA-1638091.1	29	0.5331152	1.6531762	0.010991207	0.039054554	0.9983
G ALPHA (Z) SIGNALLING EVENTS%REACTOME DATABASE ID RELEASE 73%418597	26	0.5431484	1.6528682	0.011859297	0.038960177	0.9983
GLYCOGEN BREAKDOWN (GLYCOGENOLYSIS)%REACTOME DATABASE ID RELEASE 73%70221	11	0.6748163	1.6504121	0.02	0.039579887	0.9987
RHO GTPASES ACTIVATE KTN1%REACTOME%R-HSA-5625970.1	10	0.6960392	1.6503608	0.017897092	0.039387416	0.9987
PEPTIDE LIGAND-BINDING RECEPTORS%REACTOME DATABASE ID RELEASE 73%375276	53	0.4658117	1.6465944	0.0047571855	0.040484488	0.999
GPCR LIGAND BINDING%REACTOME%R-HSA-500792.3	141	0.39317906	1.6391909	7.7175384E-4	0.042965245	0.9992
CARBOHYDRATE METABOLISM%REACTOME%R-HSA-71387.9	195	0.37643123	1.638519	3.7835792E-4	0.04298853	0.9992
INITIAL TRIGGERING OF COMPLEMENT%REACTOME DATABASE ID RELEASE 73%166663	11	0.67221683	1.6383532	0.022195073	0.042828906	0.9993
EXTRACELLULAR MATRIX ORGANIZATION%REACTOME%R-HSA-1474244.2	135	0.39440712	1.6373638	3.829217E-4	0.04300641	0.9993
SIGNALING BY INSULIN RECEPTOR%REACTOME%R-HSA-74752.1	44	0.47970843	1.6361145	0.009007245	0.043231033	0.9993
FRS2-MEDIATED ACTIVATION%REACTOME DATABASE ID RELEASE 73%170968	10	0.6922636	1.6339625	0.02113254	0.043871086	0.9994
CONSTITUTIVE SIGNALING BY AKT1 E17K IN CANCER%REACTOME%R-HSA-5674400.1	24	0.5474728	1.6326329	0.018729642	0.04412745	0.9994
MET PROMOTES CELL MOTILITY%REACTOME%R-HSA-8875878.1	18	0.5900117	1.6311979	0.016004862	0.04445464	0.9995
LAMININ INTERACTIONS%REACTOME DATABASE ID RELEASE 73%3000157	13	0.643656	1.6305314	0.021272404	0.04448502	0.9995
TRANSCRIPTIONAL REGULATION OF WHITE ADIPOCYTE DIFFERENTIATION%REACTOME DATABASE ID RELEASE 73%381340	69	0.4381623	1.6296428	0.0044401544	0.04463837	0.9996
RUNX1 REGULATES GENES INVOLVED IN MEGAKARYOCYTE DIFFERENTIATION AND PLATELET FUNCTION%REACTOME%R-HSA-8936459.1	36	0.49737647	1.6292241	0.010865271	0.044578075	0.9997
NEGATIVE REGULATION OF FGFR2 SIGNALING%REACTOME%R-HSA-5654727.1	14	0.62601966	1.6290898	0.01851475	0.044410493	0.9998
IRE1ALPHA ACTIVATES CHAPERONES%REACTOME DATABASE ID RELEASE 73%381070	43	0.4772503	1.6265602	0.008162453	0.045192044	0.9998
NEGATIVE REGULATION OF FGFR1 SIGNALING%REACTOME%R-HSA-5654726.2	14	0.62601966	1.6229486	0.019747557	0.046343997	0.9998
SIGNALING BY TGFB FAMILY MEMBERS%REACTOME%R-HSA-9006936.5	78	0.4279396	1.62282	0.0031620553	0.04616856	0.9998
NGF-STIMULATED TRANSCRIPTION%REACTOME DATABASE ID RELEASE 73%9031628	23	0.55061394	1.6222757	0.0163142	0.046153717	0.9998
ERYTHROPOIETIN ACTIVATES PHOSPHOINOSITIDE-3-KINASE (PI3K)%REACTOME%R-HSA-9027276.1	11	0.6708372	1.6211572	0.021251002	0.046393998	0.9999
NEGATIVE REGULATION OF FGFR3 SIGNALING%REACTOME DATABASE ID RELEASE 73%5654732	14	0.62601966	1.6210212	0.021905145	0.0462353	0.9999
FACTORS INVOLVED IN MEGAKARYOCYTE DEVELOPMENT AND PLATELET PRODUCTION%REACTOME DATABASE ID RELEASE 73%983231	94	0.4135483	1.6207922	0.0029626703	0.046108257	0.9999
NOTCH2 INTRACELLULAR DOMAIN REGULATES TRANSCRIPTION%REACTOME DATABASE ID RELEASE 73%2197563	10	0.6846387	1.619746	0.028668806	0.046293322	0.9999
PI3K AKT SIGNALING IN CANCER%REACTOME%R-HSA-2219528.1	58	0.44820878	1.6185565	0.0038842494	0.046547886	0.9999
NEGATIVE REGULATION OF FGFR4 SIGNALING%REACTOME DATABASE ID RELEASE 73%5654733	14	0.62601966	1.6183057	0.02326993	0.046426814	0.9999
RIP-MEDIATED NFKB ACTIVATION VIA ZBP1%REACTOME DATABASE ID RELEASE 73%1810476	17	0.58711547	1.6173885	0.023179486	0.04654741	0.9999
GAB1 SIGNALOSOME%REACTOME DATABASE ID RELEASE 73%180292	11	0.66398644	1.616321	0.022567287	0.04672917	0.9999
PKA ACTIVATION%REACTOME%R-HSA-163615.3	11	0.66788065	1.6154456	0.022297433	0.04686346	0.9999
CARDIAC CONDUCTION%REACTOME%R-HSA-5576891.2	50	0.46113053	1.6122819	0.0071118134	0.04792345	0.9999
INHIBITION OF VOLTAGE GATED CA2+ CHANNELS VIA GBETA GAMMA SUBUNITS%REACTOME%R-HSA-997272.1	13	0.6310105	1.6116992	0.023847695	0.04793821	0.9999
EPHRIN SIGNALING%REACTOME DATABASE ID RELEASE 73%3928664	12	0.6476976	1.6110266	0.02439516	0.047989547	0.9999
ACTIVATION OF GENE EXPRESSION BY SREBF (SREBP)%REACTOME%R-HSA-2426168.2	39	0.48332593	1.6110135	0.011657775	0.04777653	0.9999
RAP1 SIGNALLING%REACTOME%R-HSA-392517.2	12	0.6518485	1.6105355	0.024128143	0.047751594	1.0
ERYTHROCYTES TAKE UP CARBON DIOXIDE AND RELEASE OXYGEN%REACTOME%R-HSA-1237044.2	12	0.6445902	1.6079602	0.02512255	0.048539445	1.0
ACTIVATION OF G PROTEIN GATED POTASSIUM CHANNELS%REACTOME%R-HSA-1296041.1	13	0.6310105	1.607548	0.027021537	0.0484825	1.0
G PROTEIN GATED POTASSIUM CHANNELS%REACTOME%R-HSA-1296059.1	13	0.6310105	1.6040432	0.02532908	0.04967205	1.0
INTERLEUKIN-6 FAMILY SIGNALING%REACTOME DATABASE ID RELEASE 73%6783589	13	0.63188297	1.6039615	0.028711056	0.04948839	1.0
SPRY REGULATION OF FGF SIGNALING%REACTOME DATABASE ID RELEASE 73%1295596	13	0.62912744	1.6008632	0.02892728	0.050521232	1.0
O2 CO2 EXCHANGE IN ERYTHROCYTES%REACTOME DATABASE ID RELEASE 73%1480926	12	0.6445902	1.5990168	0.02530096	0.051085304	1.0
INWARDLY RECTIFYING K+ CHANNELS%REACTOME DATABASE ID RELEASE 73%1296065	13	0.6310105	1.5961465	0.031677905	0.05204711	1.0
SIGNALING BY WNT IN CANCER%REACTOME DATABASE ID RELEASE 73%4791275	25	0.5297152	1.5950209	0.019858155	0.05228411	1.0
GROWTH HORMONE RECEPTOR SIGNALING%REACTOME%R-HSA-982772.1	17	0.5794135	1.5936689	0.024819857	0.052663617	1.0
IRON UPTAKE AND TRANSPORT%REACTOME DATABASE ID RELEASE 73%917937	45	0.4644438	1.5891749	0.010231661	0.054380547	1.0
SIGNALING BY PTK6%REACTOME%R-HSA-8848021.2	37	0.483922	1.5875809	0.015671493	0.054857504	1.0
CELL DIVISION%REACTOME%R-HSA-68884.3	10	0.6738338	1.5828978	0.031678773	0.056677815	1.0
WNT5A-DEPENDENT INTERNALIZATION OF FZD2, FZD5 AND ROR2%REACTOME DATABASE ID RELEASE 73%5140745	10	0.6738998	1.5827737	0.028307693	0.05649137	1.0
SIGNALING BY NUCLEAR RECEPTORS%REACTOME%R-HSA-9006931.5	170	0.37048152	1.582247	0.0011454754	0.056515213	1.0
POTASSIUM CHANNELS%REACTOME DATABASE ID RELEASE 73%1296071	29	0.5093178	1.5810748	0.01848539	0.056810696	1.0
SIGNALING BY NON-RECEPTOR TYROSINE KINASES%REACTOME DATABASE ID RELEASE 73%9006927	37	0.483922	1.5795772	0.013452915	0.057238095	1.0
PKA-MEDIATED PHOSPHORYLATION OF CREB%REACTOME DATABASE ID RELEASE 73%111931	13	0.62144864	1.5786909	0.026241422	0.057400446	1.0
EPHB-MEDIATED FORWARD SIGNALING%REACTOME%R-HSA-3928662.2	30	0.5051297	1.5778043	0.018777467	0.05754714	1.0
REGULATION OF IGF ACTIVITY BY IGFBP%REACTOME DATABASE ID RELEASE 73%381426	48	0.45320794	1.5760466	0.011412829	0.058155823	1.0
CELL DEATH SIGNALLING VIA NRAGE, NRIF AND NADE%REACTOME%R-HSA-204998.1	58	0.43531877	1.5750382	0.008207934	0.058398664	1.0
POTENTIAL THERAPEUTICS FOR SARS%REACTOME DATABASE ID RELEASE 73%9679191	33	0.49410978	1.5731549	0.017881978	0.059037425	1.0
ESR-MEDIATED SIGNALING%REACTOME%R-HSA-8939211.2	125	0.3842602	1.5716064	0.0017097264	0.059508085	1.0
RHO GTPASE EFFECTORS%REACTOME%R-HSA-195258.3	198	0.36128417	1.571282	5.642279E-4	0.05940765	1.0
ACTIVATION OF ANTERIOR HOX GENES IN HINDBRAIN DEVELOPMENT DURING EARLY EMBRYOGENESIS%REACTOME DATABASE ID RELEASE 73%5617472	44	0.46075344	1.570804	0.012823042	0.05941902	1.0
VLDLR INTERNALISATION AND DEGRADATION%REACTOME%R-HSA-8866427.3	11	0.6514026	1.57027	0.03902439	0.05941613	1.0
ACTIVATION OF HOX GENES DURING DIFFERENTIATION%REACTOME%R-HSA-5619507.3	44	0.46075344	1.570262	0.013090043	0.05917811	1.0
ION HOMEOSTASIS%REACTOME DATABASE ID RELEASE 73%5578775	25	0.5186597	1.5699129	0.019128377	0.05909369	1.0
MYD88-INDEPENDENT TLR4 CASCADE%REACTOME%R-HSA-166166.2	92	0.40071636	1.5675737	0.003486345	0.059917472	1.0
REGULATION OF IFNG SIGNALING%REACTOME%R-HSA-877312.2	11	0.64965093	1.5671319	0.036976505	0.059875987	1.0
TRIF(TICAM1)-MEDIATED TLR4 SIGNALING%REACTOME DATABASE ID RELEASE 73%937061	92	0.40071636	1.5666744	0.006374348	0.059848428	1.0
TRANSFERRIN ENDOCYTOSIS AND RECYCLING%REACTOME DATABASE ID RELEASE 73%917977	22	0.53322524	1.5663857	0.023747755	0.059742123	1.0
SIGNAL AMPLIFICATION%REACTOME DATABASE ID RELEASE 73%392518	22	0.5354369	1.5643991	0.027979067	0.06042922	1.0
CLASS A 1 (RHODOPSIN-LIKE RECEPTORS)%REACTOME DATABASE ID RELEASE 73%373076	101	0.39741412	1.56421	0.0032350144	0.060280107	1.0
INTERLEUKIN-6 SIGNALING%REACTOME%R-HSA-1059683.2	10	0.6623715	1.561325	0.036661144	0.06140458	1.0
NOTCH1 INTRACELLULAR DOMAIN REGULATES TRANSCRIPTION%REACTOME%R-HSA-2122947.3	40	0.46823013	1.5605083	0.0132280355	0.061534476	1.0
INTERLEUKIN-2 FAMILY SIGNALING%REACTOME%R-HSA-451927.5	36	0.4786241	1.5599047	0.016453382	0.061602008	1.0
DAP12 INTERACTIONS%REACTOME%R-HSA-2172127.1	31	0.49364972	1.5578866	0.022017615	0.06230827	1.0
SPHINGOLIPID METABOLISM%REACTOME%R-HSA-428157.4	61	0.42950022	1.5570331	0.009958993	0.062500246	1.0
DEATH RECEPTOR SIGNALLING%REACTOME%R-HSA-73887.4	116	0.38426277	1.5546219	0.002865877	0.06342795	1.0
INTERLEUKIN-17 SIGNALING%REACTOME%R-HSA-448424.5	62	0.42730293	1.5533608	0.0096246395	0.06379757	1.0
NEGATIVE REGULATION OF THE PI3K AKT NETWORK%REACTOME%R-HSA-199418.3	65	0.4221799	1.552603	0.008155339	0.06391692	1.0
RETROGRADE NEUROTROPHIN SIGNALLING%REACTOME%R-HSA-177504.1	10	0.66111535	1.5519531	0.041481182	0.06399035	1.0
DISORDERS OF DEVELOPMENTAL BIOLOGY%REACTOME DATABASE ID RELEASE 73%9675151	10	0.6545601	1.549607	0.03852459	0.06491827	1.0
PERVASIVE DEVELOPMENTAL DISORDERS%REACTOME DATABASE ID RELEASE 73%9005895	10	0.6545601	1.5469815	0.038783424	0.0659846	1.0
LOSS OF FUNCTION OF MECP2 IN RETT SYNDROME%REACTOME DATABASE ID RELEASE 73%9005891	10	0.6545601	1.546415	0.04280234	0.06602588	1.0
NEGATIVE REGULATION OF MET ACTIVITY%REACTOME%R-HSA-6807004.1	17	0.5653413	1.5424297	0.031433787	0.06776615	1.0
REGULATION OF FOXO TRANSCRIPTIONAL ACTIVITY BY ACETYLATION%REACTOME DATABASE ID RELEASE 73%9617629	10	0.6504834	1.5417947	0.044375643	0.06783908	1.0
FOXO-MEDIATED TRANSCRIPTION OF CELL CYCLE GENES%REACTOME DATABASE ID RELEASE 73%9617828	14	0.59055364	1.5392033	0.042219542	0.06891815	1.0
TRAF6 MEDIATED NF-KB ACTIVATION%REACTOME DATABASE ID RELEASE 73%933542	23	0.5223305	1.5387858	0.03125	0.06886735	1.0
COMMON PATHWAY OF FIBRIN CLOT FORMATION%REACTOME%R-HSA-140875.4	10	0.6540521	1.5374094	0.043976657	0.069336616	1.0
NRIF SIGNALS CELL DEATH FROM THE NUCLEUS%REACTOME DATABASE ID RELEASE 73%205043	14	0.5899076	1.5364097	0.041884817	0.069606595	1.0
G BETA:GAMMA SIGNALLING THROUGH PI3KGAMMA%REACTOME%R-HSA-392451.3	18	0.5536093	1.5351253	0.035743132	0.07004376	1.0
NOTCH3 INTRACELLULAR DOMAIN REGULATES TRANSCRIPTION%REACTOME DATABASE ID RELEASE 73%9013508	16	0.568041	1.5323687	0.040583767	0.071267754	1.0
ESTROGEN-DEPENDENT NUCLEAR EVENTS DOWNSTREAM OF ESR-MEMBRANE SIGNALING%REACTOME%R-HSA-9634638.1	18	0.55148447	1.5319661	0.035663627	0.07121587	1.0
IRAK2 MEDIATED ACTIVATION OF TAK1 COMPLEX UPON TLR7 8 OR 9 STIMULATION%REACTOME DATABASE ID RELEASE 73%975163	14	0.586909	1.5305378	0.04034352	0.07170689	1.0
TRAF6-MEDIATED INDUCTION OF TAK1 COMPLEX WITHIN TLR4 COMPLEX%REACTOME DATABASE ID RELEASE 73%937072	14	0.586909	1.5272597	0.04576475	0.0731406	1.0
INTERLEUKIN RECEPTOR SHC SIGNALING%REACTOME%R-HSA-912526.4	21	0.53401196	1.5269518	0.03728606	0.07303294	1.0
COLLAGEN FORMATION%REACTOME%R-HSA-1474290.2	34	0.47418368	1.5251751	0.027087577	0.073727876	1.0
PLATELET CALCIUM HOMEOSTASIS%REACTOME%R-HSA-418360.1	18	0.5540028	1.524958	0.042054184	0.07356894	1.0
Reactome pathways downregulated in responders at baseline	SIZE	ES	NES	NOM p-val	FDR q-val	FWER p-val
MITOCHONDRIAL TRANSLATION ELONGATION%REACTOME%R-HSA-5389840.1	82	-0.62215513	-2.4214327	0.0	0.0	0.0
MITOCHONDRIAL TRANSLATION INITIATION%REACTOME DATABASE ID RELEASE 73%5368286	82	-0.618875	-2.405692	0.0	0.0	0.0
MITOCHONDRIAL TRANSLATION TERMINATION%REACTOME DATABASE ID RELEASE 73%5419276	82	-0.6186927	-2.403403	0.0	0.0	0.0
MITOCHONDRIAL TRANSLATION%REACTOME DATABASE ID RELEASE 73%5368287	88	-0.61129427	-2.4025059	0.0	0.0	0.0
TRNA PROCESSING%REACTOME DATABASE ID RELEASE 73%72306	93	-0.56810755	-2.2564166	0.0	3.0964962E-5	2.0E-4
MAJOR PATHWAY OF RRNA PROCESSING IN THE NUCLEOLUS AND CYTOSOL%REACTOME DATABASE ID RELEASE 73%6791226	171	-0.47284022	-2.0500908	0.0	0.0028439749	0.022	Comment: These four biological pathways were
RRNA PROCESSING%REACTOME DATABASE ID RELEASE 73%72312	188	-0.4612497	-2.02285	0.0	0.004372366	0.0391	also enriched in the statistical comparison between
RRNA MODIFICATION IN THE NUCLEUS AND CYTOSOL%REACTOME DATABASE ID RELEASE 73%6790901	55	-0.56276464	-2.021466	0.0	0.0038638467	0.0394	responders and non-responders at follow-up
RRNA PROCESSING IN THE NUCLEUS AND CYTOSOL%REACTOME DATABASE ID RELEASE 73%8868773	181	-0.4616888	-2.0148911	0.0	0.0039318935	0.045
MRNA SPLICING%REACTOME%R-HSA-72172.3	181	-0.45092514	-1.9619086	0.0	0.008741446	0.1069
TRNA PROCESSING IN THE NUCLEUS%REACTOME%R-HSA-6784531.5	51	-0.5501572	-1.9516745	0.0	0.0093003735	0.1242
RNA POLYMERASE I PROMOTER ESCAPE%REACTOME%R-HSA-73772.5	27	-0.62850726	-1.940445	1.9853088E-4	0.010181432	0.146
PRE-MRNA SPLICING%REACTOME%R-HSA-72163.2	173	-0.44065335	-1.9275142	0.0	0.011396069	0.1745
TRNA MODIFICATION IN THE NUCLEUS AND CYTOSOL%REACTOME%R-HSA-6782315.5	36	-0.5751011	-1.8964336	4.0791353E-4	0.016425794	0.2582
TRNA AMINOACYLATION%REACTOME%R-HSA-379724.1	22	-0.6440978	-1.8868971	0.0015977632	0.017848535	0.2954
RNA POLYMERASE I TRANSCRIPTION TERMINATION%REACTOME DATABASE ID RELEASE 73%73863	26	-0.6106055	-1.8718632	9.996002E-4	0.020434896	0.35
RESPIRATORY ELECTRON TRANSPORT%REACTOME DATABASE ID RELEASE 73%611105	89	-0.47146738	-1.8645378	0.0	0.021412116	0.3796
RNA POLYMERASE III TRANSCRIPTION INITIATION%REACTOME DATABASE ID RELEASE 73%76046	33	-0.5674479	-1.8437241	0.0015952144	0.026630875	0.4668
RNA POLYMERASE III TRANSCRIPTION INITIATION FROM TYPE 3 PROMOTER%REACTOME DATABASE ID RELEASE 73%76071	25	-0.6076439	-1.8360612	0.0013977636	0.028031725	0.5023
RESPIRATORY ELECTRON TRANSPORT, ATP SYNTHESIS BY CHEMIOSMOTIC COUPLING, AND HEAT PRODUCTION BY UNCOUPLING PROTEINS.%REACTOME%R-HSA-163200.1	92	-0.46280628	-1.8343221	0.0	0.027274715	0.5102
CLASS I PEROXISOMAL MEMBRANE PROTEIN IMPORT%REACTOME DATABASE ID RELEASE 73%9603798	18	-0.65364987	-1.8077339	0.0033530572	0.036458623	0.6306
MITOCHONDRIAL TRNA AMINOACYLATION%REACTOME%R-HSA-379726.1	16	-0.6604183	-1.791459	0.0041208793	0.042405218	0.703
SYNTHESIS OF DNA%REACTOME%R-HSA-69239.2	112	-0.4377037	-1.7908227	0.0	0.04079205	0.7047
COMPLEX I BIOGENESIS%REACTOME DATABASE ID RELEASE 73%6799198	48	-0.5100393	-1.7876853	0.0010052272	0.040517397	0.7165
HDR THROUGH HOMOLOGOUS RECOMBINATION (HRR)%REACTOME DATABASE ID RELEASE 73%5685942	60	-0.48341486	-1.7761663	4.1220116E-4	0.044722233	0.7644
PCNA-DEPENDENT LONG PATCH BASE EXCISION REPAIR%REACTOME%R-HSA-5651801.1	21	-0.6066603	-1.7562875	0.0028220117	0.05397555	0.8349
APC C:CDC20 MEDIATED DEGRADATION OF SECURIN%REACTOME DATABASE ID RELEASE 73%174154	64	-0.4693117	-1.7534772	2.0597322E-4	0.053602654	0.8426
APC C:CDC20 MEDIATED DEGRADATION OF MITOTIC PROTEINS%REACTOME DATABASE ID RELEASE 73%176409	70	-0.46336064	-1.7514696	2.0571898E-4	0.052953005	0.8495
CDC20:PHOSPHO-APC C MEDIATED DEGRADATION OF CYCLIN A%REACTOME DATABASE ID RELEASE 73%174184	68	-0.4654111	-1.7511889	2.055076E-4	0.051367607	0.8514
NON-CODING RNA METABOLISM%REACTOME DATABASE ID RELEASE 73%194441	48	-0.49340585	-1.7506512	0.0018435067	0.049924042	0.8532
AUTODEGRADATION OF CDH1 BY CDH1:APC C%REACTOME DATABASE ID RELEASE 73%174084	63	-0.47065002	-1.7499384	0.0014210313	0.048683487	0.8554
APC:CDC20 MEDIATED DEGRADATION OF CELL CYCLE PROTEINS PRIOR TO SATISFATION OF THE CELL CYCLE CHECKPOINT%REACTOME%R-HSA-179419.1	68	-0.4654111	-1.7480036	8.164932E-4	0.048262008	0.8616
SNRNP ASSEMBLY%REACTOME DATABASE ID RELEASE 73%191859	48	-0.49340585	-1.7371848	0.002051282	0.052674998	0.8926
ACTIVATION OF APC C AND APC C:CDC20 MEDIATED DEGRADATION OF MITOTIC PROTEINS%REACTOME DATABASE ID RELEASE 73%176814	70	-0.46336064	-1.7369964	4.091653E-4	0.051227693	0.893
RNA POLYMERASE III ABORTIVE AND RETRACTIVE INITIATION%REACTOME%R-HSA-749476.2	38	-0.51850814	-1.7343472	0.0024086712	0.051068846	0.9002
RNA POLYMERASE III TRANSCRIPTION%REACTOME%R-HSA-74158.2	38	-0.51850814	-1.7335955	0.003870442	0.05002456	0.9018
REGULATION OF APC C ACTIVATORS BETWEEN G1 S AND EARLY ANAPHASE%REACTOME DATABASE ID RELEASE 73%176408	75	-0.45012885	-1.7292688	6.147541E-4	0.050926365	0.9133
CDK-MEDIATED PHOSPHORYLATION AND REMOVAL OF CDC6%REACTOME DATABASE ID RELEASE 73%69017	68	-0.4563414	-1.7088721	6.107492E-4	0.06159052	0.9538
APC C:CDH1 MEDIATED DEGRADATION OF CDC20 AND OTHER APC C:CDH1 TARGETED PROTEINS IN LATE MITOSIS EARLY G1%REACTOME%R-HSA-174178.3	68	-0.45273635	-1.7080306	0.0020768433	0.060579874	0.9549
U12 DEPENDENT SPLICING%REACTOME%R-HSA-72165.1	49	-0.4849921	-1.7064899	0.0030674846	0.060007088	0.9573
APC C-MEDIATED DEGRADATION OF CELL CYCLE PROTEINS%REACTOME%R-HSA-174143.1	80	-0.43756887	-1.6961453	0.0018618122	0.06512909	0.9719
SYNTHESIS OF PIPS AT THE LATE ENDOSOME MEMBRANE%REACTOME%R-HSA-1660517.6	10	-0.7166725	-1.6900821	0.010811874	0.06772011	0.9771
REGULATION OF MITOTIC CELL CYCLE%REACTOME%R-HSA-453276.2	80	-0.43756887	-1.6864504	0.001628333	0.06860205	0.98
CAP-DEPENDENT TRANSLATION INITIATION%REACTOME%R-HSA-72737.2	115	-0.40746674	-1.6743633	4.1493776E-4	0.075311854	0.9877
RNA POLYMERASE III TRANSCRIPTION INITIATION FROM TYPE 2 PROMOTER%REACTOME DATABASE ID RELEASE 73%76066	25	-0.5458745	-1.6615348	0.010161387	0.07493779	0.9935
DEADENYLATION-DEPENDENT MRNA DECAY%REACTOME%R-HSA-429914.2	52	-0.46440056	-1.6611156	0.004430125	0.07376344	0.9935

## Sheet: 2 Reac T1RNR
Reactome pathways upregulated in responders at follow-up	SIZE	ES	NES	NOM p-val	FDR q-val	FWER p-val										__mclCluster	EnrichmentMap::GS_DESCR	EnrichmentMap::gs_size	EnrichmentMap::NES (Data Set 1)	EnrichmentMap::pvalue (Data Set 1)	EnrichmentMap::fdr_qvalue (Data Set 1)	EnrichmentMap::Genes
L13A-MEDIATED TRANSLATIONAL SILENCING OF CERULOPLASMIN EXPRESSION%REACTOME%R-HSA-156827.3	107	0.56025517	2.2809196	0.0	2.6671655E-4	3.0E-4							Cluster information			1	Cap-dependent Translation Initiation	120	2.1922	0	0.0002	EIF4A2|RPL37A|EIF4A1|RPL24|RPL27|RPL26|RPL29|RPL28|RPS4Y2|RPL10|RPL12|RPL11|RPL36A|RPS27L|RPS4Y1|RPS15A|RPS3|RPL14|RPL13|RPL15|RPL18|RPL17|RPL19|RPL39L|RPL41|RPL35A|RPL23A|RPL3L|RPS26|RPS25|RPS28|RPS27|UBA52|EIF1AX|EIF3M|EIF3K|EIF3L|EIF3I|EIF3J|EIF3G|EIF3H|EIF3E|EIF3F|EIF3C|EIF3D|EIF3A|EIF3B|RPS27A|RPS14|RPS9|RPS7|RPS6|EIF4EBP1|EIF4E|EIF4B|EIF4G1|RPS2|PABPC1|EIF2S2|EIF2S1|EIF2S3|EIF5|EIF2B5|EIF2B…
GTP HYDROLYSIS AND JOINING OF THE 60S RIBOSOMAL SUBUNIT%REACTOME%R-HSA-72706.2	108	0.55772674	2.262025	0.0	2.2591873E-4	5.0E-4							associated with Figure 4			1	Eukaryotic Translation Elongation	94	2.2461	0	0.0002	RPL37A|RPL24|RPL27|RPL26|RPL29|RPL28|RPS4Y2|RPL10|RPL12|RPL11|RPL36A|RPS27L|RPS4Y1|RPS15A|RPS3|RPL14|RPL13|RPL15|RPL18|RPL17|RPL19|RPL39L|RPL41|RPL35A|RPL23A|EEF2|RPL3L|RPS26|RPS25|RPS28|RPS27|EEF1A1|UBA52|RPS27A|RPS29|RPL27A|RPS20|RPL22L1|FAU|RPS14|RPS21|RPS24|RPL26L1|RPS23|RPL4|RPL5|RPL30|RPS9|RPL3|RPS7|RPL32|RPL31|RPLP1|RPS6|RPL34|RPL10L|RPLP0|RPL8|RPL10A|RPL9|RPL6|RPL7|RPS15|EEF1B2|RPS4X|RPL7…
EUKARYOTIC TRANSLATION ELONGATION%REACTOME%R-HSA-156842.2	87	0.5680845	2.2460556	0.0	2.4192543E-4	8.0E-4										1	Selenocysteine synthesis	93	2.1886	0	0.0002	RPL37A|RPL24|RPL27|RPL26|RPL29|RPL28|RPS4Y2|RPL10|SARS|RPL12|RPL11|RPL36A|RPS27L|RPS4Y1|RPS15A|RPS3|RPL14|RPL13|RPL15|RPL18|RPL17|RPL19|RPL39L|RPL41|RPL35A|RPL23A|RPL3L|RPS26|RPS25|RPS28|RPS27|SEPSECS|UBA52|PSTK|RPS27A|EEFSEC|RPS29|RPL27A|RPS20|RPL22L1|FAU|RPS14|RPS21|RPS24|RPL26L1|RPS23|RPL4|RPL5|RPL30|RPS9|RPL3|RPS7|RPL32|RPL31|RPLP1|RPS6|RPL34|RPL10L|RPLP0|RPL8|RPL10A|RPL9|RPL6|RPL7|RPS15|RPS4…
PEPTIDE CHAIN ELONGATION%REACTOME%R-HSA-156902.2	85	0.5710693	2.2382128	0.0	2.0352085E-4	9.0E-4										1	GTP hydrolysis and joining of the 60S ribosomal subunit	113	2.262	0	0.0002	EIF4A2|RPL37A|EIF4A1|RPL24|RPL27|RPL26|RPL29|RPL28|RPS4Y2|RPL10|RPL12|RPL11|RPL36A|RPS27L|RPS4Y1|RPS15A|RPS3|RPL14|RPL13|RPL15|RPL18|RPL17|RPL19|RPL39L|RPL41|RPL35A|RPL23A|RPL3L|RPS26|RPS25|RPS28|RPS27|UBA52|EIF1AX|EIF3M|EIF3K|EIF3L|EIF3I|EIF3J|EIF3G|EIF3H|EIF3E|EIF3F|EIF3C|EIF3D|EIF3A|EIF3B|RPS27A|RPS14|RPS9|RPS7|RPS6|EIF4E|EIF4B|EIF4G1|RPS2|EIF2S2|EIF2S1|EIF2S3|EIF5|EIF5B|RPS29|RPL27A|EIF4H|RPS…
VIRAL MRNA TRANSLATION%REACTOME%R-HSA-192823.3	85	0.56303936	2.214855	0.0	2.3485685E-4	0.0013										1	Eukaryotic Translation Initiation	120	2.201	0	0.0002	EIF4A2|RPL37A|EIF4A1|RPL24|RPL27|RPL26|RPL29|RPL28|RPS4Y2|RPL10|RPL12|RPL11|RPL36A|RPS27L|RPS4Y1|RPS15A|RPS3|RPL14|RPL13|RPL15|RPL18|RPL17|RPL19|RPL39L|RPL41|RPL35A|RPL23A|RPL3L|RPS26|RPS25|RPS28|RPS27|UBA52|EIF1AX|EIF3M|EIF3K|EIF3L|EIF3I|EIF3J|EIF3G|EIF3H|EIF3E|EIF3F|EIF3C|EIF3D|EIF3A|EIF3B|RPS27A|RPS14|RPS9|RPS7|RPS6|EIF4EBP1|EIF4E|EIF4B|EIF4G1|RPS2|PABPC1|EIF2S2|EIF2S1|EIF2S3|EIF5|EIF2B5|EIF2B…
EUKARYOTIC TRANSLATION INITIATION%REACTOME%R-HSA-72613.3	115	0.5333122	2.2010317	0.0	2.2547612E-4	0.0015										1	Formation of a pool of free 40S subunits	102	2.1842	0	0.0002	RPL37A|RPL24|RPL27|RPL26|RPL29|RPL28|RPS4Y2|RPL10|RPL12|RPL11|RPL36A|RPS27L|RPS4Y1|RPS15A|RPS3|RPL14|RPL13|RPL15|RPL18|RPL17|RPL19|RPL39L|RPL41|RPL35A|RPL23A|RPL3L|RPS26|RPS25|RPS28|RPS27|UBA52|EIF1AX|EIF3M|EIF3K|EIF3L|EIF3I|EIF3J|EIF3G|EIF3H|EIF3E|EIF3F|EIF3C|EIF3D|EIF3A|EIF3B|RPS27A|RPS14|RPS9|RPS7|RPS6|RPS2|RPS29|RPL27A|RPS20|RPL22L1|FAU|RPS21|RPS24|RPL26L1|RPS23|RPL4|RPL5|RPL30|RPL3|RPL32|RPL…
CAP-DEPENDENT TRANSLATION INITIATION%REACTOME%R-HSA-72737.2	115	0.5333122	2.1922083	0.0	2.0596926E-4	0.0016										1	Viral mRNA Translation	90	2.2149	0	0.0002	RPL37A|RPL24|RPL27|RPL26|RPL29|RPL28|RPS4Y2|RPL10|RPL12|RPL11|RPL36A|RPS27L|RPS4Y1|RPS15A|RPS3|RPL14|RPL13|RPL15|RPL18|RPL17|RPL19|RPL39L|RPL41|RPL35A|RPL23A|RPL3L|RPS26|RPS25|RPS28|RPS27|UBA52|RPS27A|RPS29|RPL27A|RPS20|RPL22L1|FAU|RPS14|RPS21|GRSF1|RPS24|DNAJC3|RPL26L1|RPS23|RPL4|RPL5|RPL30|RPS9|RPL3|RPS7|RPL32|RPL31|RPLP1|RPS6|RPL34|RPL10L|RPLP0|RPL8|RPL10A|RPL9|RPL6|RPL7|RPS15|RPS4X|RPL7A|RPS1…
SELENOCYSTEINE SYNTHESIS%REACTOME%R-HSA-2408557.2	87	0.5562707	2.1886303	0.0	2.0340098E-4	0.0018										1	Peptide chain elongation	90	2.2382	0	0.0002	RPL37A|RPL24|RPL27|RPL26|RPL29|RPL28|RPS4Y2|RPL10|RPL12|RPL11|RPL36A|RPS27L|RPS4Y1|RPS15A|RPS3|RPL14|RPL13|RPL15|RPL18|RPL17|RPL19|RPL39L|RPL41|RPL35A|RPL23A|EEF2|RPL3L|RPS26|RPS25|RPS28|RPS27|EEF1A1|UBA52|RPS27A|RPS29|RPL27A|RPS20|RPL22L1|FAU|RPS14|RPS21|RPS24|RPL26L1|RPS23|RPL4|RPL5|RPL30|RPS9|RPL3|RPS7|RPL32|RPL31|RPLP1|RPS6|RPL34|RPL10L|RPLP0|RPL8|RPL10A|RPL9|RPL6|RPL7|RPS15|RPS4X|RPL7A|RPS17…
FORMATION OF A POOL OF FREE 40S SUBUNITS%REACTOME%R-HSA-72689.2	97	0.5432645	2.1841738	0.0	1.8080088E-4	0.0018										1	L13a-mediated translational silencing of Ceruloplasmin expression	112	2.2809	0	0.0003	EIF4A2|RPL37A|EIF4A1|RPL24|RPL27|RPL26|RPL29|RPL28|RPS4Y2|RPL10|RPL12|RPL11|RPL36A|RPS27L|RPS4Y1|RPS15A|RPS3|RPL14|RPL13|RPL15|RPL18|RPL17|RPL19|RPL39L|RPL41|RPL35A|RPL23A|RPL3L|RPS26|RPS25|RPS28|RPS27|UBA52|EIF1AX|EIF3M|EIF3K|EIF3L|EIF3I|EIF3J|EIF3G|EIF3H|EIF3E|EIF3F|EIF3C|EIF3D|EIF3A|EIF3B|RPS27A|RPS14|RPS9|RPS7|RPS6|EIF4E|EIF4B|EIF4G1|RPS2|PABPC1|EIF2S2|EIF2S1|EIF2S3|RPS29|RPL27A|EIF4H|RPS20|R…
NONSENSE MEDIATED DECAY (NMD) INDEPENDENT OF THE EXON JUNCTION COMPLEX (EJC)%REACTOME DATABASE ID RELEASE 73%975956	91	0.5446727	2.1491144	0.0	3.6245107E-4	0.004										1	Nonsense Mediated Decay (NMD) independent of the Exon Junction Complex (EJC)	96	2.1491	0	0.0004	RPL37A|RPL24|RPL27|RPL26|RPL29|NCBP1|RPL28|NCBP2|RPS4Y2|RPL10|RPL12|RPL11|RPL36A|RPS27L|RPS4Y1|RPS15A|RPS3|RPL14|RPL13|RPL15|RPL18|RPL17|RPL19|RPL39L|RPL41|RPL35A|RPL23A|RPL3L|RPS26|RPS25|RPS28|RPS27|GSPT2|GSPT1|UBA52|RPS27A|UPF1|RPS29|RPL27A|RPS20|RPL22L1|FAU|RPS14|RPS21|RPS24|RPL26L1|RPS23|RPL4|RPL5|RPL30|RPS9|RPL3|RPS7|RPL32|RPL31|RPLP1|RPS6|RPL34|RPL10L|RPLP0|RPL8|RPL10A|RPL9|RPL6|RPL7|RPS15|…
EUKARYOTIC TRANSLATION TERMINATION%REACTOME DATABASE ID RELEASE 73%72764	89	0.5402774	2.1326218	0.0	4.835805E-4	0.0059										1	Eukaryotic Translation Termination	94	2.1326	0	0.0005	RPL37A|RPL24|RPL27|RPL26|RPL29|RPL28|RPS4Y2|RPL10|RPL12|RPL11|RPL36A|RPS27L|RPS4Y1|RPS15A|RPS3|RPL14|RPL13|RPL15|RPL18|RPL17|RPL19|RPL39L|RPL41|RPL35A|RPL23A|RPL3L|RPS26|RPS25|RPS28|RPS27|GSPT2|GSPT1|UBA52|APEH|RPS27A|RPS29|RPL27A|RPS20|RPL22L1|FAU|RPS14|RPS21|TRMT112|RPS24|RPL26L1|RPS23|RPL4|RPL5|RPL30|RPS9|RPL3|RPS7|RPL32|RPL31|RPLP1|RPS6|RPL34|RPL10L|RPLP0|RPL8|RPL10A|RPL9|RPL6|N6AMT1|RPL7|RPS…
INFLUENZA VIRAL RNA TRANSCRIPTION AND REPLICATION%REACTOME%R-HSA-168273.3	126	0.50374866	2.1147282	0.0	5.9471047E-4	0.0079										1	Influenza Viral RNA Transcription and Replication	133	2.1147	0	0.0006	RPL37A|RPL24|POLR2K|RPL27|POLR2L|RPL26|RPL29|POM121|RPL28|NUP205|RPS4Y2|GTF2F1|RPL10|GTF2F2|RPL12|RPL11|RPL36A|RPS27L|RPS4Y1|RPS15A|RPS3|RPL14|RPL13|AAAS|RPL15|NUP160|RPL18|RPL17|POLR2A|RPL19|NUP85|POLR2B|RPL39L|TPR|POLR2C|RPL41|POLR2D|RPL35A|NUP88|RPL23A|POLR2G|RPL3L|NUP155|POLR2I|RPS26|RPS25|POLR2J|RPS28|RPS27|NUP153|UBA52|NUP62|NDC1|SEC13|NUP133|RPS27A|NUP50|NUP54|RPS14|NUP43|RPS9|RAE1|RPS7|RA…
SELENOAMINO ACID METABOLISM%REACTOME DATABASE ID RELEASE 73%2408522	96	0.52905285	2.106323	0.0	6.815347E-4	0.0098										1	Selenoamino acid metabolism	116	2.1063	0	0.0007	RPL37A|RPL24|RPL27|RPL26|RPL29|RPL28|RPS4Y2|RPL10|RPL12|RPL11|RPL36A|RPS27L|RPS4Y1|RPS15A|RPS3|RPL14|RPL13|RPL15|RPL18|RPL17|RPL19|RPL39L|RPL41|RPL35A|RPL23A|RPL3L|RPS26|RPS25|RPS28|RPS27|SEPSECS|UBA52|PSTK|RPS27A|RPS14|RPS9|RPS7|RPS6|GNMT|SCLY|TXNRD1|SECISBP2|RPS2|AHCY|SARS|EPRS|AIMP1|AIMP2|KARS|QARS|INMT|LARS|MARS|RARS|IARS|EEF1E1|DARS|PAPSS2|PAPSS1|MAT1A|NNMT|CTH|EEFSEC|RPS29|RPL27A|RPS20|RPL2…
RRNA PROCESSING IN THE NUCLEUS AND CYTOSOL%REACTOME DATABASE ID RELEASE 73%8868773	181	0.46897337	2.0583057	0.0	0.0014563783	0.0225	Comment: These four biological pathways were									3	rRNA processing in the nucleus and cytosol	193	2.0583	0	0.0015	UBA52|RCL1|TBL3|MPHOSPH10|RPS27A|NOL11|NOP10|DDX49|DDX47|WDR3|FCF1|NAT10|THUMPD1|PWP2|WDR46|CSNK1E|WDR43|RRP9|RPS14|TRMT112|FBL|UTP14A|UTP14C|UTP15|WDR36|RPS9|RPS7|IMP3|DIMT1|RPS6|WDR75|IMP4|DDX52|UTP11L|UTP18|DIEXF|CIRH1A|NHP2L1|DKC1|NHP2|EXOSC7|HEATR1|EXOSC6|NOP2|EXOSC5|TSR3|EXOSC4|NOC4L|EXOSC9|NOL6|EXOSC8|RRP7A|EXOSC3|EMG1|EXOSC2|PDCD11|EXOSC1|BMS1|GAR1|DHX37|WBSCR22|RRP36|UTP20|RPS2|NOP14|NOP…
RESPONSE OF EIF2AK4 (GCN2) TO AMINO ACID DEFICIENCY%REACTOME DATABASE ID RELEASE 73%9633012	95	0.51344275	2.047656	0.0	0.0016296784	0.027	also enriched in the statistical comparison between									1	Response of EIF2AK4 (GCN2) to amino acid deficiency	102	2.0477	0	0.0016	RPL37A|RPL24|RPL27|RPL26|RPL29|RPL28|RPS4Y2|RPL10|RPL12|RPL11|RPL36A|RPS27L|RPS4Y1|RPS15A|RPS3|RPL14|RPL13|RPL15|RPL18|RPL17|RPL19|RPL39L|RPL41|RPL35A|RPL23A|RPL3L|RPS26|RPS25|RPS28|RPS27|UBA52|RPS27A|RPS14|CEBPB|TRIB3|RPS9|RPS7|RPS6|RPS2|ASNS|EIF2S2|EIF2S1|EIF2S3|ATF3|ATF4|EIF2AK4|RPS29|RPL27A|RPS20|RPL22L1|FAU|RPS21|RPS24|ATF2|RPL26L1|RPS23|RPL4|RPL5|IMPACT|RPL30|RPL3|RPL32|CEBPG|RPL31|RPLP1|RP…
TRANSLATION INITIATION COMPLEX FORMATION%REACTOME DATABASE ID RELEASE 73%72649	58	0.5596758	2.0445886	0.0	0.0016582981	0.0293	responders and non-responders at baseline									2	Translation initiation complex formation	59	2.0446	0	0.0017	EIF4A2|EIF4A1|RPS4Y2|RPS27L|RPS4Y1|RPS15A|RPS3|EIF2S2|EIF2S1|RPS26|EIF2S3|RPS25|RPS28|RPS27|EIF1AX|EIF3M|EIF3K|EIF3L|EIF3I|EIF3J|EIF3G|EIF3H|EIF3E|EIF3F|EIF3C|EIF3D|EIF3A|EIF3B|RPS27A|RPS29|EIF4H|RPS20|FAU|RPS14|RPS21|RPS24|RPS23|RPS9|RPS7|RPS6|RPS15|RPS4X|EIF4E|EIF4B|RPS17|RPS16|RPS19|RPS18|EIF4G1|RPS11|RPS10|RPS2|RPS13|RPS12|RPS8|RPS5|RPSA|RPS3A|PABPC1
ACTIVATION OF THE MRNA UPON BINDING OF THE CAP-BINDING COMPLEX AND EIFS, AND SUBSEQUENT BINDING TO 43S%REACTOME DATABASE ID RELEASE 73%72662	59	0.5539135	2.0345297	0.0	0.0019330644	0.0362										2	Activation of the mRNA upon binding of the cap-binding complex and eIFs, and subsequent binding to 43S	60	2.0345	0	0.0019	EIF4A2|EIF4A1|RPS4Y2|RPS27L|RPS4Y1|RPS15A|RPS3|EIF2S2|EIF2S1|RPS26|EIF2S3|RPS25|RPS28|RPS27|EIF1AX|EIF3M|EIF3K|EIF3L|EIF3I|EIF3J|EIF3G|EIF3H|EIF3E|EIF3F|EIF3C|EIF3D|EIF3A|EIF3B|RPS27A|RPS29|EIF4H|RPS20|FAU|RPS14|RPS21|RPS24|RPS23|RPS9|RPS7|RPS6|EIF4EBP1|RPS15|RPS4X|EIF4E|EIF4B|RPS17|RPS16|RPS19|RPS18|EIF4G1|RPS11|RPS10|RPS2|RPS13|RPS12|RPS8|RPS5|RPSA|RPS3A|PABPC1
MAJOR PATHWAY OF RRNA PROCESSING IN THE NUCLEOLUS AND CYTOSOL%REACTOME DATABASE ID RELEASE 73%6791226	171	0.46791306	2.027602	0.0	0.0020271237	0.0402										3	Major pathway of rRNA processing in the nucleolus and cytosol	183	2.0276	0	0.002	RPL37A|RPL24|RPL27|RPL26|RPL29|RPL28|RPS4Y2|RPL10|RPL12|RPL11|RPL36A|RPS27L|RPS4Y1|RPS15A|RPS3|RPL14|RPL13|RPL15|RPL18|RPL17|RPL19|RPL39L|RPL41|RPL35A|RPL23A|RPL3L|RPS26|RPS25|RPS28|RPS27|UBA52|RCL1|TBL3|MPHOSPH10|LTV1|RPS27A|NOL11|RRP1|ERI1|DDX49|DDX47|LAS1L|WDR3|NOL12|FCF1|RIOK2|RIOK1|PWP2|CSNK1E|WDR46|TEX10|WDR43|GNL3|RRP9|NIP7|RPS14|NOL9|EXOSC10|FBL|PES1|UTP14A|RIOK3|UTP14C|WDR18|UTP15|WDR12|…
RIBOSOMAL SCANNING AND START CODON RECOGNITION%REACTOME%R-HSA-72702.3	58	0.5500782	2.0130749	0.0	0.0026061328	0.0538										2	Ribosomal scanning and start codon recognition	59	2.0131	0	0.0026	EIF4A2|EIF4A1|RPS4Y2|RPS27L|RPS4Y1|RPS15A|RPS3|EIF2S2|EIF2S1|RPS26|EIF2S3|RPS25|RPS28|RPS27|EIF5|EIF1AX|EIF3M|EIF3K|EIF3L|EIF3I|EIF3J|EIF3G|EIF3H|EIF3E|EIF3F|EIF3C|EIF3D|EIF3A|EIF3B|RPS27A|RPS29|EIF4H|RPS20|FAU|RPS14|RPS21|RPS24|RPS23|RPS9|RPS7|RPS6|RPS15|RPS4X|EIF4E|EIF4B|RPS17|RPS16|RPS19|RPS18|EIF4G1|RPS11|RPS10|RPS2|RPS13|RPS12|RPS8|RPS5|RPSA|RPS3A
RRNA PROCESSING%REACTOME DATABASE ID RELEASE 73%72312	188	0.4567661	2.0102859	0.0	0.0025656098	0.0558										3	rRNA processing	203	2.0103	0	0.0026	UBA52|RCL1|TBL3|MPHOSPH10|RPS27A|NOL11|NOP10|DDX49|DDX47|WDR3|FCF1|NAT10|THUMPD1|PWP2|WDR46|CSNK1E|WDR43|RRP9|RPS14|TRMT112|FBL|UTP14A|UTP14C|UTP15|WDR36|RPS9|RPS7|IMP3|DIMT1|RPS6|WDR75|IMP4|DDX52|UTP11L|UTP18|DIEXF|CIRH1A|NHP2L1|DKC1|NHP2|EXOSC7|HEATR1|EXOSC6|NOP2|EXOSC5|TSR3|EXOSC4|NOC4L|EXOSC9|NOL6|EXOSC8|RRP7A|EXOSC3|EMG1|EXOSC2|PDCD11|EXOSC1|BMS1|GAR1|DHX37|WBSCR22|RRP36|UTP20|RPS2|NOP14|NOP…
INFLUENZA INFECTION%REACTOME%R-HSA-168255.4	144	0.4543702	1.9346484	0.0	0.008495398	0.1802										1	Influenza Infection	152	1.9346	0	0.0085	RPL37A|RPL24|POLR2K|RPL27|RAN|POLR2L|RPL26|RPL29|POM121|RPL28|NUP205|RPS4Y2|GTF2F1|RPL10|GTF2F2|RPL12|RPL11|RPL36A|RPS27L|RPS4Y1|RPS15A|RPS3|RPL14|RPL13|AAAS|RPL15|NUP160|RPL18|RPL17|POLR2A|RPL19|NUP85|POLR2B|RPL39L|TPR|POLR2C|RPL41|POLR2D|RPL35A|NUP88|RPL23A|POLR2G|RPL3L|NUP155|POLR2I|RPS26|RPS25|POLR2J|RPS28|RPS27|NUP153|UBA52|NUP62|NDC1|SEC13|NUP133|KPNA7|KPNA4|KPNA5|RPS27A|KPNA3|NUP50|EIF2AK2…
NONSENSE MEDIATED DECAY (NMD) ENHANCED BY THE EXON JUNCTION COMPLEX (EJC)%REACTOME%R-HSA-975957.1	111	0.4699071	1.9239994	0.0	0.009510743	0.2087										1	Nonsense Mediated Decay (NMD) enhanced by the Exon Junction Complex (EJC)	116	1.924	0	0.0095	RPL37A|RPL24|RPL27|RPL26|RPL29|NCBP1|RPL28|NCBP2|RPS4Y2|RPL10|RPL12|RPL11|RPL36A|RPS27L|RPS4Y1|RPS15A|RPS3|RPL14|RPL13|RPL15|RPL18|RPL17|RPL19|RPL39L|RPL41|RPL35A|RPL23A|RPL3L|RPS26|RPS25|RPS28|RPS27|GSPT2|GSPT1|UBA52|RPS27A|PPP2R2A|PPP2CA|PPP2R1A|RPS14|RPS9|RPS7|RPS6|DCP1A|EIF4G1|RPS2|PABPC1|EIF4A3|CASC3|MAGOH|UPF3A|UPF2|UPF1|SMG1|SMG9|RPS29|RBM8A|SMG7|RPL27A|SMG8|RPS20|SMG5|RPL22L1|SMG6|FAU|PNR…
NONSENSE-MEDIATED DECAY (NMD)%REACTOME DATABASE ID RELEASE 73%927802	111	0.4699071	1.9199333	0.0	0.009731434	0.2218										1	Nonsense-Mediated Decay (NMD)	116	1.9199	0	0.0097	RPL37A|RPL24|RPL27|RPL26|RPL29|NCBP1|RPL28|NCBP2|RPS4Y2|RPL10|RPL12|RPL11|RPL36A|RPS27L|RPS4Y1|RPS15A|RPS3|RPL14|RPL13|RPL15|RPL18|RPL17|RPL19|RPL39L|RPL41|RPL35A|RPL23A|RPL3L|RPS26|RPS25|RPS28|RPS27|GSPT2|GSPT1|UBA52|RPS27A|PPP2R2A|PPP2CA|PPP2R1A|RPS14|RPS9|RPS7|RPS6|DCP1A|EIF4G1|RPS2|PABPC1|EIF4A3|CASC3|MAGOH|UPF3A|UPF2|UPF1|SMG1|SMG9|RPS29|RBM8A|SMG7|RPL27A|SMG8|RPS20|SMG5|RPL22L1|SMG6|FAU|PNR…
PHOSPHORYLATION OF CD3 AND TCR ZETA CHAINS%REACTOME%R-HSA-202427.6	20	0.664759	1.9116467	8.3594566E-4	0.010625625	0.2489											Interferon alpha beta signaling	67	-2.1073	0	0.0103	IFITM1|IFITM2|IFIT5|IFI35|IFIT1|IFIT3|IFIT2|JAK1|RSAD2|HLA-B|HLA-C|HLA-F|SOCS1|HLA-G|HLA-E|EGR1|BST2|IFNA5|IFNA4|IFNA7|HLA-A|IFNA6|IFNA1|IFNA2|IFNA8|SOCS3|RNASEL|IFI6|STAT2|IFNA13|IFNA14|TYK2|IFNA16|IFNA17|IFNA10|IFNAR1|IFNA21|ISG20|PSMB8|XAF1|PTPN1|ADAR|OASL|OAS1|IRF4|OAS2|OAS3|IRF1|IRF2|IRF8|IRF5|IRF6|PTPN6|IRF9|USP18|GBP2|IFNB1|MX2|MX1|ABCE1|IRF3|IRF7|SAMHD1|ISG15|IP6K2|IFITM3|PTPN11
RUNX1 INTERACTS WITH CO-FACTORS WHOSE PRECISE EFFECT ON RUNX1 TARGETS IS NOT KNOWN%REACTOME%R-HSA-8939243.1	33	0.57938236	1.8879896	6.2682823E-4	0.014248493	0.3298											Phosphorylation of CD3 and TCR zeta chains	22	1.9116	0.0008	0.0106	HLA-DRB3|HLA-DRB1|CD4|HLA-DRA|PTPRC|LCK|PTPN22|HLA-DPA1|PAG1|CSK|HLA-DQB2|HLA-DQB1|CD3G|CD3E|CD3D|HLA-DPB1|PTPRJ|TRAV19|HLA-DQA2|HLA-DQA1|HLA-DRB5|HLA-DRB4
FORMATION OF THE TERNARY COMPLEX, AND SUBSEQUENTLY, THE 43S COMPLEX%REACTOME DATABASE ID RELEASE 73%72695	51	0.52484226	1.8654072	2.1362957E-4	0.018732257	0.4206											RUNX1 interacts with co-factors whose precise effect on RUNX1 targets is not known	36	1.888	0.0006	0.0142	RUNX1|AUTS2|SMARCA2|SMARCA4|BMI1|EP300|PBRM1|SMARCD1|SMARCD2|PHC2|SMARCD3|PHC1|PCGF5|SMARCB1|PHC3|HIPK2|RYBP|RNF2|SMARCE1|SMARCC1|SMARCC2|ACTL6B|RING1|CBX8|ACTL6A|ARID2|CBX6|CBX4|YAF2|CBX2|CSNK2A1|CSNK2B|CSNK2A2|ARID1A|CBFB|ARID1B
REGULATION OF TP53 ACTIVITY THROUGH ACETYLATION%REACTOME DATABASE ID RELEASE 73%6804758	29	0.5860343	1.8539844	0.0010369142	0.02097622	0.4676										2	Formation of the ternary complex, and subsequently, the 43S complex	52	1.8654	0.0002	0.0187	RPS4Y2|RPS27L|RPS4Y1|RPS15A|RPS3|EIF2S2|EIF2S1|RPS26|EIF2S3|RPS25|RPS28|RPS27|EIF1AX|EIF3M|EIF3K|EIF3L|EIF3I|EIF3J|EIF3G|EIF3H|EIF3E|EIF3F|EIF3C|EIF3D|EIF3A|EIF3B|RPS27A|RPS29|RPS20|FAU|RPS14|RPS21|RPS24|RPS23|RPS9|RPS7|RPS6|RPS15|RPS4X|RPS17|RPS16|RPS19|RPS18|RPS11|RPS10|RPS2|RPS13|RPS12|RPS8|RPS5|RPSA|RPS3A
VOLTAGE GATED POTASSIUM CHANNELS%REACTOME DATABASE ID RELEASE 73%1296072	11	0.7496951	1.8341724	0.0020404	0.025672993	0.5503											Regulation of TP53 Activity through Acetylation	30	1.854	0.001	0.021	TMEM55B|PML|MBD3|CHD4|CHD3|BRD7|EP300|GATAD2B|GATAD2A|AKT3|BRPF1|BRPF3|AKT2|RBBP7|MAP2K6|PIN1|HDAC2|HDAC1|ING5|ING2|MEAF6|PIP4K2A|PIP4K2B|PIP4K2C|TP53|RBBP4|AKT1|BRD1|KAT6A|MTA2
FORMATION OF THE BETA-CATENIN:TCF TRANSACTIVATING COMPLEX%REACTOME DATABASE ID RELEASE 73%201722	26	0.5898258	1.8155802	0.0025120368	0.031356234	0.6384											Voltage gated Potassium channels	43	1.8342	0.002	0.0257	KCND1|KCNH6|KCND2|KCNH7|KCNB1|KCND3|KCNB2|KCNH8|KCNAB1|KCNAB2|KCNAB3|KCNS1|KCNG2|KCNS2|KCNQ1|KCNQ4|KCNA10|KCNQ5|KCNS3|KCNC2|KCNQ2|KCNQ3|KCNG1|KCNG3|KCNG4|KCNC1|KCNA1|KCNC3|KCNA2|KCNC4|KCNA3|KCNA4|KCNA5|KCNA6|KCNA7|KCNV1|KCNV2|KCNH1|KCNH2|KCNH3|KCNF1|KCNH4|KCNH5
ION TRANSPORT BY P-TYPE ATPASES%REACTOME DATABASE ID RELEASE 73%936837	31	0.55861235	1.7887541	0.0020661156	0.04145748	0.7495											Formation of the beta-catenin:TCF transactivating complex	91	1.8156	0.0025	0.0314	SMARCA4|RUVBL1|HIST1H2AE|HIST1H2AD|EP300|HIST3H2BB|HIST1H2AC|HIST1H2AB|HIST1H2AJ|CDC73|TERT|HIST2H3A|HIST1H2BF|HIST1H2BE|HIST1H2BH|HIST1H2BG|HIST1H2BB|BCL9L|HIST2H3D|HIST1H2BA|HIST2H3C|PYGO1|HIST1H2BD|PYGO2|HIST1H2BC|LEO1|BCL9|H2AFB1|HIST1H3J|HIST1H3A|HIST1H3F|AXIN2|HIST1H3G|HIST1H3H|HIST1H3I|HIST1H3B|HIST1H3C|HIST1H3D|HIST1H3E|HIST1H4K|ASH2L|H3F3B|HIST1H4L|H3F3A|H2BFS|HIST1H4A|HIST1H4B|HIST1H4H|…
RMTS METHYLATE HISTONE ARGININES%REACTOME%R-HSA-3214858.2	28	0.56785	1.7772579	0.0045445156	0.0457019	0.7924											Ion transport by P-type ATPases	54	1.7888	0.0021	0.0415	ATP10B|ATP10A|ATP2C2|ATP2C1|ATP9B|ATP9A|ATP8B3|ATP8B2|ATP8B1|ATP13A1|ATP4B|ATP4A|ATP13A4|ATP13A5|ATP13A2|CUTC|ATP8A2|ATP12A|ATP7B|ATP2A3|ATP11C|ATP2A2|ATP10D|ATP2A1|CAMK2B|CAMK2D|CAMK2A|PDZD11|CAMK2G|ATP1B3|ATP1B2|ATP11B|ATP1B1|ATP11A|SRI|ATP8A1|ATP2B4|ATP2B3|ATP2B2|ATP8B4|ATP2B1|FXYD4|FXYD3|FXYD2|FXYD1|FXYD7|FXYD6|ATP7A|SLN|ATP1A4|ATP1A3|ATP1A2|ATP1A1|PLN
SRP-DEPENDENT COTRANSLATIONAL PROTEIN TARGETING TO MEMBRANE%REACTOME DATABASE ID RELEASE 73%1799339	107	0.42682102	1.7411267	4.3696744E-4	0.06587165	0.9003											Interferon gamma signaling	90	-1.9713	0	0.0415	PTAFR|PML|IFI30|JAK1|ICAM1|TRIM29|TRIM26|SUMO1|TRIM22|GBP6|GBP5|GBP7|HLA-B|HLA-C|PIAS1|HLA-F|SOCS1|HLA-G|HLA-E|TRIM17|TRIM14|TRIM10|HLA-DQA2|HLA-DQA1|HLA-DRB5|HLA-DRB4|HLA-DRB3|HLA-DRB1|CAMK2B|CAMK2D|HLA-A|B2M|CAMK2A|TRIM8|IFNGR1|TRIM6|IFNGR2|SOCS3|TRIM5|TRIM2|TRIM3|HLA-DPA1|HLA-DQB2|CAMK2G|HLA-DQB1|SP100|HLA-DPB1|NCAM1|MID1|IFNG|VCAM1|HLA-DRA|CIITA|PTPN1|OASL|TRIM68|TRIM62|JAK2|OAS1|IRF4|OAS2|OA…
RRNA MODIFICATION IN THE NUCLEUS AND CYTOSOL%REACTOME DATABASE ID RELEASE 73%6790901	55	0.47738713	1.7366066	0.0012845215	0.067042775	0.9109											RMTs methylate histone arginines	79	1.7773	0.0045	0.0457	SMARCA2|SMARCA4|HIST1H2AE|HIST1H2AD|HIST1H2AC|PRMT6|HIST1H2AB|PRMT5|PBRM1|HIST1H2AJ|PRMT1|HIST2H3A|HIST2H3D|HIST2H3C|H2AFB1|HIST1H3J|HIST1H3A|HIST1H3F|HIST1H3G|HIST1H3H|HIST1H3I|HIST1H3B|ACTL6B|HIST1H3C|HIST1H3D|HIST1H3E|HIST1H4K|ACTL6A|ARID2|HIST1H4L|HIST2H2AB|HIST1H4A|HIST1H2AG|HIST1H2AA|HIST1H4B|HIST1H2AM|HIST1H4H|HIST1H2AL|HIST1H4I|PRMT7|HIST1H4J|HIST1H2AI|HIST1H2AH|HIST1H4C|HIST1H2AK|HIST1H4…
																4	Antigen processing-Cross presentation	99	-1.9805	0	0.0531	PSMC5|PSMC6|PSMC3|PSMC4|PSMC1|PSMC2|IKBKB|PSMD8|PSMD9|PSMD6|PSMD7|TLR1|PSMD4|HLA-B|PSMD5|HLA-C|PSMD2|HLA-F|PSMD3|HLA-G|PSMD1|HLA-E|IKBKG|TLR2|CHUK|PSMA5|PSMA6|PSMA3|PSMA4|PSMA1|PSMA2|PSME3|PSME4|PSME1|HLA-A|PSME2|UBA52|B2M|PSMD10|PSMB11|PSMD12|PSMD11|PSMD14|LY96|PSMD13|SEC22B|PSMA7|PSMB10|PSMA8|CD14|PSMB6|TLR4|PSMB7|PSMB4|PSMB5|UBB|PSMB2|PSMB3|UBC|PSMB1|PSMF1|RPS27A|SHFM1|PSMB8|PSMB9|ITGAV|FCGR1A…
Reactome pathways downregulated in responders at follow-up	SIZE	ES	NES	NOM p-val	FDR q-val	FWER p-val											MASTL Facilitates Mitotic Progression	10	-1.8866	0.0012	0.0643	CDK1|PPP2CA|PPP2CB|PPP2R1B|ARPP19|PPP2R1A|MASTL|CCNB1|PPP2R2D|ENSA
INTERFERON ALPHA BETA SIGNALING%REACTOME%R-HSA-909733.2	49	-0.6092793	-2.1073039	0.0	0.010322566	0.0095										1	SRP-dependent cotranslational protein targeting to membrane	113	1.7411	0.0004	0.0659	RPL37A|RPL24|RPL27|RPL26|RPL29|RPL28|RPS4Y2|RPL10|RPL12|RPL11|RPL36A|RPS27L|RPS4Y1|RPS15A|RPS3|RPL14|RPL13|RPL15|RPL18|RPL17|RPL19|RPL39L|RPL41|RPL35A|RPL23A|RPL3L|RPS26|RPS25|RPS28|RPS27|UBA52|DDOST|RPS27A|SPCS3|SPCS2|SPCS1|SEC11A|SEC11C|RPS14|RPS9|RPS7|RPS6|RPS2|SSR1|TRAM1|SRPR|SRP54|SSR4|SSR2|SSR3|SRP9|SRP72|SRP68|SRP19|SRP14|SEC61A2|SRPRB|SEC61A1|SEC61G|RPS29|SEC61B|RPL27A|RPS20|RPL22L1|FAU|R…
ANTIGEN PROCESSING-CROSS PRESENTATION%REACTOME%R-HSA-1236975.1	94	-0.5096511	-1.980474	0.0	0.053129766	0.0929											rRNA modification in the nucleus and cytosol	60	1.7366	0.0013	0.067	RCL1|TBL3|MPHOSPH10|NOL11|NOP10|DDX49|DDX47|WDR3|FCF1|NAT10|THUMPD1|PWP2|WDR46|WDR43|RRP9|RPS14|TRMT112|FBL|UTP14A|UTP14C|UTP15|WDR36|RPS9|RPS7|IMP3|DIMT1|RPS6|WDR75|IMP4|DDX52|UTP11L|UTP18|DIEXF|CIRH1A|NHP2L1|DKC1|NHP2|DCAF13|HEATR1|NOP2|TSR3|NOC4L|NOL6|RRP7A|EMG1|PDCD11|BMS1|GAR1|DHX37|WBSCR22|RRP36|UTP20|NOP56|RPS2|NOP14|NOP58|UTP6|KRR1|UTP3|PNO1
INTERFERON GAMMA SIGNALING%REACTOME%R-HSA-877300.2	75	-0.524461	-1.9712881	0.0	0.041470304	0.1078										4	ER-Phagosome pathway	83	-1.8913	0	0.0701	PSMC5|PSMC6|PSMC3|PSMC4|PSMC1|PSMC2|IKBKB|PSMD8|PSMD9|PSMD6|PSMD7|TLR1|PSMD4|HLA-B|PSMD5|HLA-C|PSMD2|HLA-F|PSMD3|HLA-G|PSMD1|HLA-E|IKBKG|TLR2|CHUK|PSMA5|PSMA6|PSMA3|PSMA4|PSMA1|PSMA2|PSME3|PSME4|PSME1|HLA-A|PSME2|UBA52|B2M|PSMD10|PSMB11|PSMD12|PSMD11|PSMD14|LY96|PSMD13|SEC22B|PSMA7|PSMB10|PSMA8|CD14|PSMB6|TLR4|PSMB7|PSMB4|PSMB5|UBB|PSMB2|PSMB3|UBC|PSMB1|TAP2|PSMF1|TAP1|RPS27A|SHFM1|SNAP23|PSMB8|S…
ADP SIGNALLING THROUGH P2Y PURINOCEPTOR 12%REACTOME%R-HSA-392170.2	14	-0.73457295	-1.9029135	7.875566E-4	0.07142187	0.2794											ADP signalling through P2Y purinoceptor 12	22	-1.9029	0.0008	0.0714	GNAI3|GNB2|P2RY12|GNAI1|GNB1|GNAI2|GNB4|GNAT3|GNG3|GNB3|GNG2|GNG5|GNB5|GNG4|GNG7|GNGT1|GNG8|GNGT2|GNG10|GNG12|GNG11|GNG13
ER-PHAGOSOME PATHWAY%REACTOME%R-HSA-1236974.4	80	-0.49875745	-1.8912765	0.0	0.0700672	0.3211											Scavenging of heme from plasma	22	-1.8673	0.0012	0.0728	IGHA1|ALB|CD163|AMBP|APOL1|IGKV5-2|IGKV2-28|HP|IGKV1-12|HBB|JCHAIN|IGKV3D-20|LRP1|IGKV2D-28|IGKV4-1|HBA2|HBA1|IGKV2D-30|APOA1|HPR|HPX|IGKV3-11
MASTL FACILITATES MITOTIC PROGRESSION%REACTOME%R-HSA-2465910.2	10	-0.80085486	-1.8865727	0.0011914218	0.06429304	0.3397
SCAVENGING OF HEME FROM PLASMA%REACTOME DATABASE ID RELEASE 73%2168880	13	-0.7410939	-1.8673152	0.0011659542	0.072828256	0.4168

## Sheet: 3 Reac RT1T0
Reactome pathways upregulated in responders at follow-up vs baseline	SIZE	ES	NES	NOM p-val	FDR q-val	FWER p-val																						__mclCluster	EnrichmentMap::GS_DESCR	EnrichmentMap::gs_size	EnrichmentMap::NES (210701_GSEA210701_RT1T0_reactomFDR0075)	EnrichmentMap::fdr_qvalue (210701_GSEA210701_RT1T0_reactomFDR0075)	EnrichmentMap::pvalue (210701_GSEA210701_RT1T0_reactomFDR0075)	EnrichmentMap::Genes
TRNA MODIFICATION IN THE NUCLEUS AND CYTOSOL%REACTOME%R-HSA-6782315.5	36	0.6856479	2.2408996	0.0	1.0980043E-4	2.0E-4																						7	Mitochondrial translation	93	1.7969	0.0221	0	DAP3|MRPS35|MRPS36|MRPS33|MRPL18|MRPS34|MRPL19|MRPL16|MRPS31|MRPL17|MRPL14|MRPS30|MRPL15|MRPL12|MRPL13|MRPL57|MRPL54|MRPL10|MRPL11|MRPL55|MRPL20|ICT1|GADD45GIP1|PTCD3|MRPL27|MRPL28|ERAL1|MRPL23|MRPL24|MRPL21|MRPL22|MRPL30|MRPS17|GFM1|MRPS15|MRPS16|MRPS14|MRPS11|MRPS12|GFM2|MRRF|MTRF1L|MRPL38|MRPL39|MRPS10|MTFMT|MRPL36|MTIF2|MRPL37|MTIF3|MRPL34|MRPL35|MRPL32|MRPL33|MRPL41|MRPL4|MRPL3|MRPL42|MRPL2|…
MAJOR PATHWAY OF RRNA PROCESSING IN THE NUCLEOLUS AND CYTOSOL%REACTOME DATABASE ID RELEASE 73%6791226	171	0.52442855	2.2190967	0.0	1.0987492E-4	4.0E-4																			Cluster information			1	Toll Like Receptor TLR1:TLR2 Cascade	94	-2.045	0.0043	0	DUSP4|NFKBIA|JUN|NFKBIB|IKBKB|TAB3|UBE2N|TAB2|TAB1|TLR1|APP|SOCS1|TRAF6|IKBKG|BTRC|TLR2|MAP3K7|SKP1|UBE2V1|CHUK|MAPK8|FBXW11|ECSIT|RPS6KA3|MAP2K6|RPS6KA5|RPS6KA2|MEF2A|MAPK9|RPS6KA1|IRAK2|S100A12|MAP2K7|UBA52|MAP3K1|S100B|NFKB2|MAPK10|NKIRAS1|TNIP2|NKIRAS2|ATF1|FOS|MAP3K8|LY96|MAP2K3|CUL1|MAP2K4|IRAK3|HMGB1|SIGIRR|RELA|MAPKAPK3|PELI1|PELI3|MAP2K1|PELI2|CD14|NOD1|TLR4|NOD2|AGER|IRAK1|UBB|UBC|RIPK2…
RRNA PROCESSING%REACTOME DATABASE ID RELEASE 73%72312	188	0.5156947	2.2030375	0.0	1.1074098E-4	6.0E-4																			associated with the figure			9	Platelet activation, signaling and aggregation	254	-2.1394	0.0017	0	CD9|VAV1|VAV2|CD109|APP|GNA13|PRKCB|APBB1IP|RAF1|TLN1|VCL|ITGB3|ITGA2B|ARRB1|ARRB2|RAP1B|SPARC|RAP1A|CSK|CAP1|FLNA|FN1|PPBP|MGLL|CLU|PIK3R3|PIK3R2|PIK3R6|PIK3R5|PDGFB|MAPK14|AKT1|PRKCD|HGF|PRKCA|F2RL2|YWHAZ|F2RL3|VEGFC|VEGFA|FIGF|VEGFB|PSAP|BRPF3|PPIA|RAPGEF3|RAPGEF4|LCP2|LAT|THBS1|PTPN1|STXBP2|STX4|PRKCH|RAC2|RHOG|DGKG|DGKE|DGKD|DGKB|DGKA|ABHD12|LYN|PDPK1|DGKZ|DGKQ|DGKK|DGKI|DGKH|PRKCQ|ABHD6|ISL…
RRNA PROCESSING IN THE NUCLEUS AND CYTOSOL%REACTOME DATABASE ID RELEASE 73%8868773	181	0.5138907	2.1898265	0.0	1.1101575E-4	8.0E-4																						17	PCP CE pathway	91	-1.7888	0.0279	0	PSMC5|PSMC6|PSMC3|PSMC4|PSMC1|PSMC2|SCRIB|PRICKLE1|FZD1|PSMD8|FZD3|PSMD9|FZD2|PSMD6|VANGL2|PSMD7|PSMD4|PSMD5|PSMD2|PSMD3|PSMD1|CLTC|CLTA|AP2A1|PRKCB|PSMA5|AP2A2|PSMA6|PSMA3|PSMA4|PSMA1|PSMA2|PSME3|PSME4|AP2M1|PSME1|PSME2|UBA52|PSMD10|PSMB11|PSMD12|PSMD11|PSMD14|ARRB2|PSMD13|SMURF2|PFN1|PSMA7|PSMB10|PSMA8|PSMB6|PSMB7|PSMB4|AP2S1|PSMB5|UBB|CLTB|PSMB2|PSMB3|UBC|PSMB1|FZD5|AP2B1|PSMF1|FZD4|RPS27A|SHF…
TRNA PROCESSING%REACTOME DATABASE ID RELEASE 73%72306	93	0.5543316	2.1614552	0.0	1.881012E-4	0.0017																						1	TRAF6 mediated induction of NFkB and MAP kinases upon TLR7 8 or 9 activation	90	-1.8965	0.0145	0	DUSP4|NFKBIA|JUN|TLR9|NFKBIB|TLR8|IKBKB|TAB3|TLR7|UBE2N|TAB2|TAB1|APP|TRAF6|IKBKG|BTRC|MAP3K7|SKP1|UBE2V1|CHUK|MAPK8|FBXW11|ECSIT|RPS6KA3|MAP2K6|RPS6KA5|RPS6KA2|MEF2A|MAPK9|RPS6KA1|IRAK2|S100A12|MAP2K7|UBA52|MAP3K1|S100B|NFKB2|MAPK10|NKIRAS1|TNIP2|NKIRAS2|TICAM2|ATF1|FOS|MAP3K8|LY96|MAP2K3|CUL1|MAP2K4|HMGB1|TICAM1|RELA|MAPKAPK3|PELI1|PELI3|MAP2K1|PELI2|CD14|NOD1|TLR4|NOD2|AGER|IRAK1|UBB|UBC|RIPK2…
CAP-DEPENDENT TRANSLATION INITIATION%REACTOME%R-HSA-72737.2	115	0.5188133	2.0857775	0.0	9.595471E-4	0.0104																						8	Translation initiation complex formation	59	1.8341	0.0169	0.0001	EIF4A2|EIF4A1|RPS4Y2|RPS27L|RPS4Y1|RPS15A|RPS3|EIF2S2|EIF2S1|RPS26|EIF2S3|RPS25|RPS28|RPS27|EIF1AX|EIF3M|EIF3K|EIF3L|EIF3I|EIF3J|EIF3G|EIF3H|EIF3E|EIF3F|EIF3C|EIF3D|EIF3A|EIF3B|RPS27A|RPS29|EIF4H|RPS20|FAU|RPS14|RPS21|RPS24|RPS23|RPS9|RPS7|RPS6|RPS15|RPS4X|EIF4E|EIF4B|RPS17|RPS16|RPS19|RPS18|EIF4G1|RPS11|RPS10|RPS2|RPS13|RPS12|RPS8|RPS5|RPSA|RPS3A|PABPC1
EUKARYOTIC TRANSLATION INITIATION%REACTOME%R-HSA-72613.3	115	0.5188133	2.084551	0.0	8.2246895E-4	0.0104																							Interferon alpha beta signaling	67	-2.044	0.0042	0	IFITM1|IFITM2|IFIT5|IFI35|IFIT1|IFIT3|IFIT2|JAK1|RSAD2|HLA-B|HLA-C|HLA-F|SOCS1|HLA-G|HLA-E|EGR1|BST2|IFNA5|IFNA4|IFNA7|HLA-A|IFNA6|IFNA1|IFNA2|IFNA8|SOCS3|RNASEL|IFI6|STAT2|IFNA13|IFNA14|TYK2|IFNA16|IFNA17|IFNA10|IFNAR1|IFNA21|ISG20|PSMB8|XAF1|PTPN1|ADAR|OASL|OAS1|IRF4|OAS2|OAS3|IRF1|IRF2|IRF8|IRF5|IRF6|PTPN6|IRF9|USP18|GBP2|IFNB1|MX2|MX1|ABCE1|IRF3|IRF7|SAMHD1|ISG15|IP6K2|IFITM3|PTPN11
L13A-MEDIATED TRANSLATIONAL SILENCING OF CERULOPLASMIN EXPRESSION%REACTOME%R-HSA-156827.3	107	0.5127168	2.04208	0.0	0.0017161575	0.0247																						2	Eukaryotic Translation Initiation	120	2.0846	0.0008	0	EIF4A2|RPL37A|EIF4A1|RPL24|RPL27|RPL26|RPL29|RPL28|RPS4Y2|RPL10|RPL12|RPL11|RPL36A|RPS27L|RPS4Y1|RPS15A|RPS3|RPL14|RPL13|RPL15|RPL18|RPL17|RPL19|RPL39L|RPL41|RPL35A|RPL23A|RPL3L|RPS26|RPS25|RPS28|RPS27|UBA52|EIF1AX|EIF3M|EIF3K|EIF3L|EIF3I|EIF3J|EIF3G|EIF3H|EIF3E|EIF3F|EIF3C|EIF3D|EIF3A|EIF3B|RPS27A|RPS14|RPS9|RPS7|RPS6|EIF4EBP1|EIF4E|EIF4B|EIF4G1|RPS2|PABPC1|EIF2S2|EIF2S1|EIF2S3|EIF5|EIF2B5|EIF2B…
FORMATION OF A POOL OF FREE 40S SUBUNITS%REACTOME%R-HSA-72689.2	97	0.51363164	2.022658	1.4291839E-4	0.0021533568	0.0347																							FCGR3A-mediated IL10 synthesis	46	-2.0221	0.005	0.0005	IGHG2|YES1|IL10|LYN|IGKV5-2|FYN|IGKV2-28|IGKV1-12|IGKV3D-20|ADCY4|IGKV2D-28|ADCY3|ADCY2|IGKV4-1|ADCY1|HCK|ADCY8|ADCY7|ADCY6|IGKV2D-30|ADCY5|CREB1|IGKV3-11|FCGR1A|PLCG2|ADCY9|PRKAR1B|SYK|PRKX|FCGR3A|PRKAR1A|FCGR2A|PLCG1|PRKAR2B|PRKAR2A|FGR|CD3G|PRKACG|PRKACA|ITPR1|ITPR2|ITPR3|PRKACB|IGHG4|IGHG1|AHCYL1
GTP HYDROLYSIS AND JOINING OF THE 60S RIBOSOMAL SUBUNIT%REACTOME%R-HSA-72706.2	108	0.5088356	2.0220861	0.0	0.0019660906	0.0352																						4	RNA Polymerase III Transcription	40	1.791	0.0217	0.0009	POLR2K|POLR2L|SNAPC5|SNAPC1|SNAPC2|SNAPC3|SNAPC4|BDP1|GTF3C1|GTF3C2|GTF3C3|GTF3C4|GTF3C5|TBP|ZNF143|GTF3C6|POU2F1|BRF2|BRF1|GTF3A|CRCP|POLR1C|NFIX|SSB|POLR3GL|NFIA|NFIB|POLR3A|NFIC|POLR3B|POLR3C|POLR3D|POLR3E|POLR3F|POLR3G|POLR3H|POLR3K|POLR2E|POLR2F|POLR2H
RRNA MODIFICATION IN THE NUCLEUS AND CYTOSOL%REACTOME DATABASE ID RELEASE 73%6790901	55	0.56472594	2.0147576	0.0	0.002029106	0.0398																						10	Anti-inflammatory response favouring Leishmania parasite infection	174	-1.9813	0.0072	0	YES1|ADORA2B|P2RY11|LYN|IGKV5-2|CYSLTR1|IGKV2-28|IGKV1-12|IGKV3D-20|ADCY4|IGKV2D-28|ADCY3|ADCY2|IGKV4-1|ADCY1|RXFP1|ADCY8|RXFP2|ADCY7|ADCY6|IGKV2D-30|ADCY5|IGKV3-11|PLCG2|FSHB|ADCY9|PRKAR1B|PRKAR1A|PRKAR2B|PTGIR|GLP1R|PRKAR2A|MC2R|GPR15|FGR|GNAS|GPR27|GPR25|GPR20|PTH1R|GPR32|PTH2R|GPR45|AVPR2|ITPR1|ITPR2|TSHB|GPR83|ITPR3|MC1R|AHCYL1|PTH2|FSHR|CD163|AVP|PTHLH|GPR176|GIP|MC4R|IL6|GPR150|GPHA2|CRH|G…
EUKARYOTIC TRANSLATION ELONGATION%REACTOME%R-HSA-156842.2	87	0.5186156	2.0020647	0.0	0.0023219155	0.0489																						5	GABA B receptor activation	43	-1.8388	0.02	0.0045	GABBR1|KCNJ10|GNB2|GNB1|KCNJ9|GNB4|GNB3|KCNJ15|KCNJ16|GNB5|GNGT1|GNGT2|ADCY4|ADCY3|ADCY2|ADCY1|ADCY8|ADCY7|ADCY6|ADCY5|GNAL|GNAI3|GNAI1|ADCY9|GNAI2|GNAT3|GNG3|GNG2|GNG5|GNG4|GNG7|GNG8|KCNJ4|KCNJ12|KCNJ2|GNG10|KCNJ3|GNG12|KCNJ5|GNG11|GABBR2|GNG13|KCNJ6
PEPTIDE CHAIN ELONGATION%REACTOME%R-HSA-156902.2	85	0.51837945	1.9860921	0.0	0.0029458278	0.0665																						18	Diseases associated with the TLR signaling cascade	24	-2.2834	0.0006	0	NFKBIA|NFKB1|NFKB2|UNC93B1|IKBKB|TRAF3|TLR3|LY96|TICAM1|TLR1|TLR10|RELA|TLR5|IKBKG|CD14|TLR4|TLR2|TLR6|CHUK|IRAK4|TIRAP|MYD88|BTK|CD36
RNA POLYMERASE III TRANSCRIPTION INITIATION FROM TYPE 2 PROMOTER%REACTOME DATABASE ID RELEASE 73%76066	25	0.6507079	1.9729079	3.270111E-4	0.0034604718	0.0832																						3	Cellular response to hypoxia	75	-1.9059	0.0135	0	VEGFA|PSMC5|PSMC6|PSMC3|PSMC4|PSMC1|PSMC2|UBE2D2|CITED2|UBE2D3|EP300|UBE2D1|PSMD8|PSMD9|PSMD6|PSMD7|HIGD1A|PSMD4|PSMD5|PSMD2|PSMD3|PSMD1|PSMA5|PSMA6|PSMA3|PSMA4|RBX1|PSMA1|PSMA2|PSME3|PSME4|PSME1|CUL2|PSME2|UBA52|PSMD10|PSMB11|PSMD12|PSMD11|PSMD14|PSMD13|PSMA7|PSMB10|PSMA8|PSMB6|PSMB7|PSMB4|PSMB5|UBB|PSMB2|PSMB3|EPO|UBC|PSMB1|PSMF1|RPS27A|SHFM1|PSMB8|PSMB9|LIMD1|EGLN1|EGLN3|HIF1AN|EGLN2|WTIP|CREB…
RNA POLYMERASE III TRANSCRIPTION INITIATION FROM TYPE 1 PROMOTER%REACTOME DATABASE ID RELEASE 73%76061	26	0.6388398	1.9365524	6.504065E-4	0.0059082615	0.1482																						6	Parasite infection	67	-2.2487	0.0004	0	IGHG2|WASL|YES1|VAV1|VAV2|ACTB|MYO10|LYN|IGKV5-2|IGKV2-28|IGKV1-12|IGKV3D-20|IGKV2D-28|IGKV4-1|CYFIP2|CYFIP1|IGKV2D-30|NCKAP1|WIPF1|WIPF2|WIPF3|IGKV3-11|WAS|BRK1|NCKIPSD|NCKAP1L|WASF1|WASF2|WASF3|BAIAP2|ABI2|MYO5A|ABI1|MYH9|FGR|CDC42|CD3G|ARPC1B|ARPC1A|MYH2|MYO9B|ACTG1|ABL1|MYO1C|FYN|PTK2|HCK|BTK|SYK|FCGR3A|ARPC4|ARPC5|ARPC2|ELMO1|ARPC3|ELMO2|DOCK1|CRK|NCK1|ACTR3|ACTR2|RAC1|VAV3|IGHG4|MAPK1|IGHG1…
SELENOCYSTEINE SYNTHESIS%REACTOME%R-HSA-2408557.2	87	0.5015347	1.9358389	0.0	0.005584115	0.1494																						2	Influenza Viral RNA Transcription and Replication	133	1.8415	0.0159	0	RPL37A|RPL24|POLR2K|RPL27|POLR2L|RPL26|RPL29|POM121|RPL28|NUP205|RPS4Y2|GTF2F1|RPL10|GTF2F2|RPL12|RPL11|RPL36A|RPS27L|RPS4Y1|RPS15A|RPS3|RPL14|RPL13|AAAS|RPL15|NUP160|RPL18|RPL17|POLR2A|RPL19|NUP85|POLR2B|RPL39L|TPR|POLR2C|RPL41|POLR2D|RPL35A|NUP88|RPL23A|POLR2G|RPL3L|NUP155|POLR2I|RPS26|RPS25|POLR2J|RPS28|RPS27|NUP153|UBA52|NUP62|NDC1|SEC13|NUP133|RPS27A|NUP50|NUP54|RPS14|NUP43|RPS9|RAE1|RPS7|RA…
RNA POLYMERASE III TRANSCRIPTION INITIATION%REACTOME DATABASE ID RELEASE 73%76046	33	0.59877247	1.9298142	0.0	0.005799475	0.164																						7	Mitochondrial translation elongation	87	1.8204	0.0189	0.0001	DAP3|MRPS35|MRPS36|MRPS33|MRPL18|MRPS34|MRPL19|MRPL16|MRPS31|MRPL17|MRPL14|MRPS30|MRPL15|MRPL12|MRPL13|MRPL57|MRPL54|MRPL10|MRPL11|MRPL55|MRPL20|ICT1|GADD45GIP1|PTCD3|MRPL27|MRPL28|ERAL1|MRPL23|MRPL24|MRPL21|MRPL22|MRPL30|MRPS17|GFM1|MRPS15|MRPS16|MRPS14|MRPS11|MRPS12|MRPL38|MRPL39|MRPS10|MRPL36|MRPL37|MRPL34|MRPL35|MRPL32|MRPL33|MRPL41|MRPL4|MRPL3|MRPL42|MRPL2|MRPL40|MRPL1|MRPL9|CHCHD1|MRPS28|TS…
RNA POLYMERASE I TRANSCRIPTION INITIATION%REACTOME DATABASE ID RELEASE 73%73762	43	0.565276	1.9279999	0.0	0.00561656	0.1678																						3	Hedgehog ligand biogenesis	65	-1.7645	0.0309	0.0014	SHH|DHH|GPC5|PSMC5|PSMC6|PSMC3|PSMC4|PSMC1|VCP|PSMC2|NOTUM|SEL1L|PSMD8|PSMD9|PSMD6|PSMD7|PSMD4|PSMD5|PSMD2|PSMD3|PSMD1|ADAM17|PSMA5|PSMA6|PSMA3|PSMA4|PSMA1|PSMA2|PSME3|PSME4|PSME1|PSME2|UBA52|IHH|PSMD10|PSMB11|PSMD12|PSMD11|PSMD14|PSMD13|PSMA7|PSMB10|PSMA8|PSMB6|PSMB7|PSMB4|PSMB5|UBB|PSMB2|PSMB3|UBC|PSMB1|PSMF1|RPS27A|SHFM1|PSMB8|PSMB9|DERL2|ERLEC1|OS9|HHAT|SYVN1|P4HB|SCUBE2|DISP2
VIRAL MRNA TRANSLATION%REACTOME%R-HSA-192823.3	85	0.49871397	1.9194843	0.0	0.0061438754	0.1912																							tRNA modification in the nucleus and cytosol	41	2.2409	0.0001	0	EPRS|ALKBH8|THG1L|TRMT44|TRMT112|PUS3|METTL1|CDKAL1|PUS7|QTRTD1|FTSJ1|KIAA1456|THADA|OSGEP|TRMT13|TRMT11|TYW5|TYW3|WDR4|TRMT5|TYW1|NSUN2|TRMT12|NSUN6|LCMT2|QTRT1|DUS2|CTU2|CTU1|URM1|LAGE3|TRDMT1|TRMT10A|ADAT1|TPRKB|TRMT1|TRIT1|ADAT2|TRMT6|TP53RK|TRMT61A
EUKARYOTIC TRANSLATION TERMINATION%REACTOME DATABASE ID RELEASE 73%72764	89	0.4878378	1.8919321	0.0	0.008800658	0.2707																						8	Activation of the mRNA upon binding of the cap-binding complex and eIFs, and subsequent binding to 43S	60	1.8497	0.0149	0.0004	EIF4A2|EIF4A1|RPS4Y2|RPS27L|RPS4Y1|RPS15A|RPS3|EIF2S2|EIF2S1|RPS26|EIF2S3|RPS25|RPS28|RPS27|EIF1AX|EIF3M|EIF3K|EIF3L|EIF3I|EIF3J|EIF3G|EIF3H|EIF3E|EIF3F|EIF3C|EIF3D|EIF3A|EIF3B|RPS27A|RPS29|EIF4H|RPS20|FAU|RPS14|RPS21|RPS24|RPS23|RPS9|RPS7|RPS6|EIF4EBP1|RPS15|RPS4X|EIF4E|EIF4B|RPS17|RPS16|RPS19|RPS18|EIF4G1|RPS11|RPS10|RPS2|RPS13|RPS12|RPS8|RPS5|RPSA|RPS3A|PABPC1
NONSENSE MEDIATED DECAY (NMD) INDEPENDENT OF THE EXON JUNCTION COMPLEX (EJC)%REACTOME DATABASE ID RELEASE 73%975956	91	0.47778243	1.8530997	0.0	0.014842785	0.4282																						9	Response to elevated platelet cytosolic Ca2+	129	-2.1133	0.0023	0	CD9|CD109|APP|ISLR|CHID1|PRKCB|SERPINF2|GTPBP2|SYTL4|TLN1|NHLRC2|VCL|ENDOD1|ITGB3|A1BG|ITGA2B|CYB5R1|VTI1B|F8|APOOL|SPARC|HRG|PFN1|FERMT3|SERPINA3|SERPINA4|TMSB4X|CAP1|TIMP3|FLNA|ANXA5|FN1|PPBP|APOA1|PCYOX1L|FAM49B|LAMP2|SCCPDH|WDR1|CFD|SCG3|CLU|PHACTR2|ITIH4|ITIH3|TTN|TGFB1|CLEC3B|ACTN2|CDC37L1|EGF|IGF2|IGF1|CALU|PCDH7|SERPINA1|SERPINE1|HABP4|PDGFB|QSOX1|AHSG|ACTN1|ACTN4|SEPP1|HGF|GAS6|PRKCA|TAG…
ACTIVATION OF THE MRNA UPON BINDING OF THE CAP-BINDING COMPLEX AND EIFS, AND SUBSEQUENT BINDING TO 43S%REACTOME DATABASE ID RELEASE 73%72662	59	0.51119536	1.8496746	4.489002E-4	0.014867455	0.4434																						22	Interleukin-1 family signaling	138	-1.8006	0.0256	0	NFKBIA|PSMC5|PSMC6|PSMC3|PSMC4|PSMC1|TOLLIP|PSMC2|NFKBIB|IKBKB|PSMD8|UBE2N|PSMD9|PSMD6|PSMD7|PSMD4|APP|PSMD5|PSMD2|PSMD3|PSMD1|TRAF6|IKBKG|BTRC|MAP3K7|SKP1|UBE2V1|CHUK|MAPK8|FBXW11|PSMA5|PSMA6|PSMA3|PSMA4|PSMA1|MAP2K6|PSMA2|PSME3|PSME4|IL1RN|PSME1|PSME2|UBA52|IL1R1|NFKB2|IL1R2|PSMD10|NKIRAS1|PSMB11|NKIRAS2|PSMD12|PSMD11|PSMD14|PSMD13|CUL1|HMGB1|RELA|PSMA7|PSMB10|MAP2K1|PSMA8|SQSTM1|PSMB6|PSMB7|PS…
INFLUENZA VIRAL RNA TRANSCRIPTION AND REPLICATION%REACTOME%R-HSA-168273.3	126	0.45188582	1.8414918	0.0	0.015880862	0.4812																						4	RNA Polymerase III Transcription Initiation From Type 2 Promoter	26	1.9729	0.0035	0.0003	POLR2K|POLR2L|BDP1|GTF3C1|GTF3C2|GTF3C3|GTF3C4|GTF3C5|TBP|GTF3C6|BRF1|CRCP|POLR1C|POLR3GL|POLR3A|POLR3B|POLR3C|POLR3D|POLR3E|POLR3F|POLR3G|POLR3H|POLR3K|POLR2E|POLR2F|POLR2H
TRANSLATION INITIATION COMPLEX FORMATION%REACTOME DATABASE ID RELEASE 73%72649	58	0.5082959	1.8340733	1.4956626E-4	0.01689921	0.5138																						1	Toll Like Receptor 3 (TLR3) Cascade	92	-1.7423	0.0363	0.0014	DUSP4|NFKBIA|JUN|RIPK1|UBE2D2|UBE2D3|NFKBIB|UBE2D1|IKBKB|TAB3|UBE2N|TAB2|TAB1|BIRC2|APP|BIRC3|TRAF6|IKBKG|BTRC|MAP3K7|SKP1|UBE2V1|CHUK|MAPK8|FBXW11|RPS6KA3|MAP2K6|RPS6KA5|RPS6KA2|MEF2A|MAPK9|RPS6KA1|IRAK2|S100A12|MAP2K7|RIPK3|UBA52|S100B|NFKB2|MAPK10|NKIRAS1|TNIP2|NKIRAS2|TLR3|ATF1|FOS|MAP3K8|MAP2K3|CUL1|MAP2K4|HMGB1|TICAM1|CASP8|RELA|MAPKAPK3|FADD|MAP2K1|NOD1|NOD2|AGER|IRAK1|UBB|UBC|RIPK2|RPS27A…
MITOCHONDRIAL TRANSLATION TERMINATION%REACTOME DATABASE ID RELEASE 73%5419276	82	0.478299	1.8228896	0.0	0.01898342	0.5696																						1	MyD88 dependent cascade initiated on endosome	91	-1.896	0.0144	0	DUSP4|NFKBIA|JUN|TLR9|NFKBIB|TLR8|IKBKB|TAB3|TLR7|UBE2N|TAB2|TAB1|APP|TRAF6|IKBKG|BTRC|MAP3K7|SKP1|UBE2V1|CHUK|MAPK8|FBXW11|ECSIT|RPS6KA3|MAP2K6|RPS6KA5|RPS6KA2|MEF2A|MAPK9|RPS6KA1|IRAK2|S100A12|MAP2K7|UBA52|MAP3K1|S100B|NFKB2|MAPK10|NKIRAS1|TNIP2|NKIRAS2|TICAM2|ATF1|FOS|MAP3K8|LY96|MAP2K3|CUL1|MAP2K4|HMGB1|TICAM1|RELA|MAPKAPK3|PELI1|PELI3|MAP2K1|PELI2|CD14|NOD1|TLR4|NOD2|AGER|IRAK1|UBB|UBC|RIPK2…
MITOCHONDRIAL TRANSLATION ELONGATION%REACTOME%R-HSA-5389840.1	82	0.47730356	1.8204141	1.4587892E-4	0.018868549	0.5832																						24	IRAK4 deficiency (TLR2 4)	11	-2.1763	0.001	0.0002	TLR1|CD14|TLR4|TLR2|TLR6|IRAK4|TIRAP|MYD88|LY96|BTK|CD36
SELENOAMINO ACID METABOLISM%REACTOME DATABASE ID RELEASE 73%2408522	96	0.46198916	1.8178049	0.0	0.01883126	0.5961																						2	Peptide chain elongation	90	1.9861	0.0029	0	RPL37A|RPL24|RPL27|RPL26|RPL29|RPL28|RPS4Y2|RPL10|RPL12|RPL11|RPL36A|RPS27L|RPS4Y1|RPS15A|RPS3|RPL14|RPL13|RPL15|RPL18|RPL17|RPL19|RPL39L|RPL41|RPL35A|RPL23A|EEF2|RPL3L|RPS26|RPS25|RPS28|RPS27|EEF1A1|UBA52|RPS27A|RPS29|RPL27A|RPS20|RPL22L1|FAU|RPS14|RPS21|RPS24|RPL26L1|RPS23|RPL4|RPL5|RPL30|RPS9|RPL3|RPS7|RPL32|RPL31|RPLP1|RPS6|RPL34|RPL10L|RPLP0|RPL8|RPL10A|RPL9|RPL6|RPL7|RPS15|RPS4X|RPL7A|RPS17…
TRNA AMINOACYLATION%REACTOME%R-HSA-379724.1	22	0.6163431	1.8055876	0.0023399633	0.021290341	0.6569																						6	Fcgamma receptor (FCGR) dependent phagocytosis	94	-2.0908	0.003	0	IGHG2|WASL|YES1|VAV1|NF2|VAV2|ACTB|CFL1|MYO10|LYN|IGKV5-2|IGKV2-28|IGKV1-12|IGKV3D-20|IGKV2D-28|IGKV4-1|CYFIP2|CYFIP1|IGKV2D-30|NCKAP1|WIPF1|WIPF2|WIPF3|IGKV3-11|WAS|BRK1|NCKIPSD|NCKAP1L|PLCG2|WASF1|WASF2|WASF3|BAIAP2|ABI2|MYO5A|HSP90AB1|ABI1|PPAPDC1A|PPAPDC1B|MYH9|FGR|PLD4|CDC42|CD3G|PAK1|ARPC1B|ARPC1A|PLD1|ITPR1|ITPR2|PLD3|MYH2|ITPR3|PLD2|AHCYL1|LIMK1|MYO9B|ACTG1|ABL1|MYO1C|FYN|PRKCE|PTK2|HCK|P…
CLASS I PEROXISOMAL MEMBRANE PROTEIN IMPORT%REACTOME DATABASE ID RELEASE 73%9603798	18	0.64798605	1.7997113	0.0025025024	0.022093916	0.6821																						11	RHO GTPases Activate ROCKs	19	-2.0058	0.0058	0.0002	ROCK1|LIMK2|MYL12B|ROCK2|LIMK1|PPP1CB|PPP1R12B|RHOC|CFL1|PPP1R12A|MYL9|RHOB|MYL6|MYH9|PAK1|RHOA|MYH14|MYH11|MYH10
MITOCHONDRIAL TRANSLATION%REACTOME DATABASE ID RELEASE 73%5368287	88	0.4650641	1.7968515	0.0	0.022126023	0.695																							Amyloid fiber formation	109	-2.0682	0.0037	0	PARK2|UBE2L6|APP|LTF|APH1A|APH1B|UBA52|B2M|NPPA|UBB|APOA1|UBC|LYZ|RPS27A|GSN|SEMG1|SIAH2|SIAH1|USP9X|PSENEN|INS|TSPAN5|NAT8|TGFBI|ITM2B|CALB1|BACE1|APCS|TSPAN33|GGA2|GGA1|GGA3|SNCA|ODAM|SNCAIP|SORL1|TSPAN15|APOA4|TSPAN14|SAA1|PRL|TTR|MFGE8|CST3|HIST1H2AE|HIST1H2AD|HIST3H2BB|HIST1H2AC|HIST1H2AB|HIST1H2AJ|HIST2H3A|HIST1H2BF|HIST1H2BE|HIST1H2BH|ADAM10|HIST1H2BG|HSPG2|HIST1H2BB|HIST2H3D|HIST1H2BA|HIS…
RNA POLYMERASE III ABORTIVE AND RETRACTIVE INITIATION%REACTOME%R-HSA-749476.2	38	0.5391187	1.7951901	0.0015842839	0.02191503	0.702																						5	Inhibition of voltage gated Ca2+ channels via Gbeta gamma subunits	29	-1.8566	0.0186	0.0046	GABBR1|KCNJ10|GNB2|GNB1|KCNJ9|GNB4|GNB3|KCNJ15|KCNJ16|GNB5|GNGT1|GNGT2|GNG3|GNG2|GNG5|GNG4|GNG7|GNG8|KCNJ4|KCNJ12|KCNJ2|GNG10|KCNJ3|GNG12|KCNJ5|GNG11|GABBR2|GNG13|KCNJ6
PHASE 0 - RAPID DEPOLARISATION%REACTOME%R-HSA-5576892.2	13	0.7002041	1.7919557	0.0040795514	0.022107212	0.7162																						2	GTP hydrolysis and joining of the 60S ribosomal subunit	113	2.0221	0.002	0	EIF4A2|RPL37A|EIF4A1|RPL24|RPL27|RPL26|RPL29|RPL28|RPS4Y2|RPL10|RPL12|RPL11|RPL36A|RPS27L|RPS4Y1|RPS15A|RPS3|RPL14|RPL13|RPL15|RPL18|RPL17|RPL19|RPL39L|RPL41|RPL35A|RPL23A|RPL3L|RPS26|RPS25|RPS28|RPS27|UBA52|EIF1AX|EIF3M|EIF3K|EIF3L|EIF3I|EIF3J|EIF3G|EIF3H|EIF3E|EIF3F|EIF3C|EIF3D|EIF3A|EIF3B|RPS27A|RPS14|RPS9|RPS7|RPS6|EIF4E|EIF4B|EIF4G1|RPS2|EIF2S2|EIF2S1|EIF2S3|EIF5|EIF5B|RPS29|RPL27A|EIF4H|RPS…
RNA POLYMERASE III TRANSCRIPTION%REACTOME%R-HSA-74158.2	38	0.5391187	1.7909895	9.422111E-4	0.021704983	0.7211																						1	Toll Like Receptor TLR6:TLR2 Cascade	94	-2.0382	0.0043	0	DUSP4|NFKBIA|JUN|NFKBIB|IKBKB|TAB3|UBE2N|TAB2|TAB1|TLR1|APP|SOCS1|TRAF6|IKBKG|BTRC|TLR2|MAP3K7|SKP1|UBE2V1|CHUK|MAPK8|FBXW11|ECSIT|RPS6KA3|MAP2K6|RPS6KA5|RPS6KA2|MEF2A|MAPK9|RPS6KA1|IRAK2|S100A12|MAP2K7|UBA52|MAP3K1|S100B|NFKB2|MAPK10|NKIRAS1|TNIP2|NKIRAS2|ATF1|FOS|MAP3K8|LY96|MAP2K3|CUL1|MAP2K4|IRAK3|HMGB1|SIGIRR|RELA|MAPKAPK3|PELI1|PELI3|MAP2K1|PELI2|CD14|NOD1|TLR4|NOD2|AGER|IRAK1|UBB|UBC|RIPK2…
RNA POLYMERASE I PROMOTER CLEARANCE%REACTOME%R-HSA-73854.3	46	0.5168742	1.7857637	0.0012488292	0.02243548	0.7441																						10	Leishmania parasite growth and survival	174	-1.9909	0.0065	0	YES1|ADORA2B|P2RY11|LYN|IGKV5-2|CYSLTR1|IGKV2-28|IGKV1-12|IGKV3D-20|ADCY4|IGKV2D-28|ADCY3|ADCY2|IGKV4-1|ADCY1|RXFP1|ADCY8|RXFP2|ADCY7|ADCY6|IGKV2D-30|ADCY5|IGKV3-11|PLCG2|FSHB|ADCY9|PRKAR1B|PRKAR1A|PRKAR2B|PTGIR|GLP1R|PRKAR2A|MC2R|GPR15|FGR|GNAS|GPR27|GPR25|GPR20|PTH1R|GPR32|PTH2R|GPR45|AVPR2|ITPR1|ITPR2|TSHB|GPR83|ITPR3|MC1R|AHCYL1|PTH2|FSHR|CD163|AVP|PTHLH|GPR176|GIP|MC4R|IL6|GPR150|GPHA2|CRH|G…
RIBOSOMAL SCANNING AND START CODON RECOGNITION%REACTOME%R-HSA-72702.3	58	0.4975054	1.7830327	3.010688E-4	0.022516131	0.7574																						3	Assembly of the pre-replicative complex	68	-1.82	0.022	0	PSMC5|PSMC6|PSMC3|PSMC4|PSMC1|PSMC2|PSMD8|PSMD9|PSMD6|PSMD7|PSMD4|PSMD5|PSMD2|PSMD3|PSMD1|PSMA5|PSMA6|PSMA3|PSMA4|PSMA1|PSMA2|PSME3|PSME4|PSME1|PSME2|UBA52|PSMD10|PSMB11|PSMD12|PSMD11|PSMD14|PSMD13|PSMA7|PSMB10|PSMA8|PSMB6|PSMB7|PSMB4|PSMB5|UBB|PSMB2|PSMB3|MCM7|UBC|MCM8|PSMB1|MCM3|PSMF1|MCM4|RPS27A|MCM5|SHFM1|MCM6|MCM2|PSMB8|ORC5|PSMB9|ORC4|ORC6|ORC1|ORC3|ORC2|GMNN|E2F1|CDT1|E2F2|CDC6|E2F3
RNA POLYMERASE I TRANSCRIPTION%REACTOME DATABASE ID RELEASE 73%73864	46	0.5168742	1.7743088	0.0012360939	0.024254637	0.792																						25	Antigen processing-Cross presentation	99	-2.2619	0.0006	0	PSMC5|PSMC6|PSMC3|PSMC4|PSMC1|PSMC2|IKBKB|PSMD8|PSMD9|PSMD6|PSMD7|TLR1|PSMD4|HLA-B|PSMD5|HLA-C|PSMD2|HLA-F|PSMD3|HLA-G|PSMD1|HLA-E|IKBKG|TLR2|CHUK|PSMA5|PSMA6|PSMA3|PSMA4|PSMA1|PSMA2|PSME3|PSME4|PSME1|HLA-A|PSME2|UBA52|B2M|PSMD10|PSMB11|PSMD12|PSMD11|PSMD14|LY96|PSMD13|SEC22B|PSMA7|PSMB10|PSMA8|CD14|PSMB6|TLR4|PSMB7|PSMB4|PSMB5|UBB|PSMB2|PSMB3|UBC|PSMB1|PSMF1|RPS27A|SHFM1|PSMB8|PSMB9|ITGAV|FCGR1A…
SYNTHESIS OF GLYCOSYLPHOSPHATIDYLINOSITOL (GPI)%REACTOME DATABASE ID RELEASE 73%162710	15	0.6681752	1.7739342	0.004889563	0.02369794	0.7937																						12	Signaling by NOTCH3	48	-1.9524	0.0093	0.0003	RPS27A|MAML3|SNW1|HES1|NEURL1|EP300|TACC3|WWC1|NOTCH3|CREBBP|STAT1|YBX1|FABP7|NEURL1B|JAG2|HES5|DLL4|DLGAP5|PLXND1|JAG1|PTCRA|NOTCH1|WWP2|DLL1|MIB1|RBPJ|HEYL|ADAM10|PSENEN|HEY1|KAT2B|KAT2A|PSEN2|HEY2|EGF|PSEN1|MAMLD1|EGFR|APH1A|APH1B|UBA52|NCSTN|MAML2|MAML1|PBX1|MIB2|UBB|UBC
RNA POLYMERASE III TRANSCRIPTION INITIATION FROM TYPE 3 PROMOTER%REACTOME DATABASE ID RELEASE 73%76071	25	0.5884064	1.7716817	0.00295858	0.02374487	0.8024																							Smooth Muscle Contraction	37	-2.0539	0.0041	0	MYL12B|ITGB5|TRIM72|LMOD1|DYSF|MYL6B|ACTG2|CALD1|ANXA6|MYL10|CAV3|TPM4|ANXA2|TPM3|TPM2|TPM1|ANXA1|SORBS1|SORBS3|MYLPF|MYL5|MYL7|PAK2|MYH11|GUCY1B3|MYL12A|TLN1|VCL|MYLK|GUCY1A3|GUCY1A2|MYL9|MYL6|ACTA2|PXN|PAK1|ITGA1
MITOCHONDRIAL TRANSLATION INITIATION%REACTOME DATABASE ID RELEASE 73%5368286	82	0.46479577	1.7711343	4.3190326E-4	0.023286764	0.805																						13	C-type lectin receptors (CLRs)	134	-1.681	0.0478	0	NFKBIA|CLEC10A|PSMC5|PSMC6|PSMC3|PSMC4|PSMC1|PSMC2|LYN|IKBKB|PSMD8|UBE2N|PSMD9|PSMD6|PSMD7|MAP3K14|PSMD4|PDPK1|MUC20|PSMD5|ICAM2|PSMD2|CDC34|ICAM3|PSMD3|PSMD1|TRAF6|IKBKG|BTRC|MAP3K7|SKP1|UBE2V1|CHUK|FBXW11|PSMA5|PSMA6|PSMA3|RAF1|PSMA4|PSMA1|PLCG2|PSMA2|RPS6KA5|PSME3|PSME4|PSME1|PSME2|UBA52|CARD11|NFKB2|PSMD10|PPP3R1|PSMB11|PSMD12|PSMD11|PSMD14|PSMD13|CUL1|BCL10|MALT1|CASP8|RELA|PPP3CB|PSMA7|PSMB…
RNA POLYMERASE III CHAIN ELONGATION%REACTOME DATABASE ID RELEASE 73%73780	16	0.6514907	1.76881	0.0032467532	0.023387374	0.8151																						18	Diseases of Immune System	24	-2.2873	0.0016	0	NFKBIA|NFKB1|NFKB2|UNC93B1|IKBKB|TRAF3|TLR3|LY96|TICAM1|TLR1|TLR10|RELA|TLR5|IKBKG|CD14|TLR4|TLR2|TLR6|CHUK|IRAK4|TIRAP|MYD88|BTK|CD36
MITOCHONDRIAL TRNA AMINOACYLATION%REACTOME%R-HSA-379726.1	16	0.65463203	1.754344	0.0044746436	0.027175698	0.8659																						1	Toll Like Receptor 10 (TLR10) Cascade	84	-1.8293	0.0211	0.0003	DUSP4|NFKBIA|JUN|NFKBIB|IKBKB|TAB3|UBE2N|TAB2|TAB1|APP|TRAF6|IKBKG|BTRC|MAP3K7|SKP1|UBE2V1|CHUK|MAPK8|FBXW11|ECSIT|RPS6KA3|MAP2K6|RPS6KA5|RPS6KA2|MEF2A|MAPK9|RPS6KA1|IRAK2|S100A12|MAP2K7|UBA52|MAP3K1|S100B|NFKB2|MAPK10|NKIRAS1|TNIP2|NKIRAS2|ATF1|FOS|MAP3K8|MAP2K3|CUL1|MAP2K4|HMGB1|TLR10|RELA|MAPKAPK3|TLR5|PELI1|PELI3|MAP2K1|PELI2|NOD1|NOD2|AGER|IRAK1|UBB|UBC|RIPK2|RPS27A|NFKB1|PPP2CA|PPP2CB|PPP2R…
RESPONSE OF EIF2AK4 (GCN2) TO AMINO ACID DEFICIENCY%REACTOME DATABASE ID RELEASE 73%9633012	95	0.44682884	1.7486917	4.2722872E-4	0.028335813	0.8827																						4	RNA Polymerase III Transcription Initiation From Type 1 Promoter	27	1.9366	0.0059	0.0007	POLR2K|POLR2L|BDP1|GTF3C1|GTF3C2|GTF3C3|GTF3C4|GTF3C5|TBP|GTF3C6|BRF1|GTF3A|CRCP|POLR1C|POLR3GL|POLR3A|POLR3B|POLR3C|POLR3D|POLR3E|POLR3F|POLR3G|POLR3H|POLR3K|POLR2E|POLR2F|POLR2H
FORMATION OF THE TERNARY COMPLEX, AND SUBSEQUENTLY, THE 43S COMPLEX%REACTOME DATABASE ID RELEASE 73%72695	51	0.49251267	1.7328882	0.0019593067	0.033117197	0.9228																						14	Major pathway of rRNA processing in the nucleolus and cytosol	183	2.2191	0.0001	0	RPL37A|RPL24|RPL27|RPL26|RPL29|RPL28|RPS4Y2|RPL10|RPL12|RPL11|RPL36A|RPS27L|RPS4Y1|RPS15A|RPS3|RPL14|RPL13|RPL15|RPL18|RPL17|RPL19|RPL39L|RPL41|RPL35A|RPL23A|RPL3L|RPS26|RPS25|RPS28|RPS27|UBA52|RCL1|TBL3|MPHOSPH10|LTV1|RPS27A|NOL11|RRP1|ERI1|DDX49|DDX47|LAS1L|WDR3|NOL12|FCF1|RIOK2|RIOK1|PWP2|CSNK1E|WDR46|TEX10|WDR43|GNL3|RRP9|NIP7|RPS14|NOL9|EXOSC10|FBL|PES1|UTP14A|RIOK3|UTP14C|WDR18|UTP15|WDR12|…
RNA POLYMERASE I TRANSCRIPTION TERMINATION%REACTOME DATABASE ID RELEASE 73%73863	26	0.5707948	1.7325588	0.00522108	0.03247143	0.9233																						4	RNA Polymerase III Chain Elongation	17	1.7688	0.0234	0.0032	POLR2K|POLR1C|POLR2L|POLR3GL|POLR3A|POLR3B|POLR3C|POLR3D|POLR3E|POLR3F|POLR3G|POLR3H|POLR3K|POLR2E|POLR2F|POLR2H|CRCP
DEFECTS IN VITAMIN AND COFACTOR METABOLISM%REACTOME DATABASE ID RELEASE 73%3296482	19	0.6038484	1.7063345	0.008371635	0.042495046	0.9705																						17	Beta-catenin independent WNT signaling	141	-1.7003	0.044	0.0004	TNRC6C|PSMC5|PSMC6|PSMC3|PSMC4|PSMC1|PSMC2|SCRIB|PRICKLE1|PRKG1|FZD1|FZD3|PSMD8|FZD2|PSMD9|VANGL2|PSMD6|PSMD7|PSMD4|PSMD5|PDE6G|PSMD2|PSMD3|PSMD1|PDE6B|PDE6A|NLK|MAP3K7|PRKCB|PSMA5|PSMA6|PSMA3|PSMA4|PSMA1|PSMA2|PSME3|PSME4|PSME1|PRKG2|PSME2|UBA52|CAMK2A|PSMD10|PPP3R1|PSMB11|PSMD12|PSMD11|PSMD14|ARRB2|PSMD13|PFN1|PPP3CB|PSMA7|PSMB10|PSMA8|PSMB6|TCF7|PSMB7|PSMB4|PSMB5|UBB|ITPR1|PSMB2|ITPR2|PSMB3|IT…
RNA POLYMERASE I PROMOTER ESCAPE%REACTOME%R-HSA-73772.5	27	0.5506062	1.6987523	0.0067917206	0.045230076	0.9779																						2	Selenoamino acid metabolism	116	1.8178	0.0188	0	RPL37A|RPL24|RPL27|RPL26|RPL29|RPL28|RPS4Y2|RPL10|RPL12|RPL11|RPL36A|RPS27L|RPS4Y1|RPS15A|RPS3|RPL14|RPL13|RPL15|RPL18|RPL17|RPL19|RPL39L|RPL41|RPL35A|RPL23A|RPL3L|RPS26|RPS25|RPS28|RPS27|SEPSECS|UBA52|PSTK|RPS27A|RPS14|RPS9|RPS7|RPS6|GNMT|SCLY|TXNRD1|SECISBP2|RPS2|AHCY|SARS|EPRS|AIMP1|AIMP2|KARS|QARS|INMT|LARS|MARS|RARS|IARS|EEF1E1|DARS|PAPSS2|PAPSS1|MAT1A|NNMT|CTH|EEFSEC|RPS29|RPL27A|RPS20|RPL2…
NON-CODING RNA METABOLISM%REACTOME DATABASE ID RELEASE 73%194441	48	0.48802552	1.6963178	0.0024487297	0.04542627	0.9795																						25	ER-Phagosome pathway	83	-2.0957	0.0029	0	PSMC5|PSMC6|PSMC3|PSMC4|PSMC1|PSMC2|IKBKB|PSMD8|PSMD9|PSMD6|PSMD7|TLR1|PSMD4|HLA-B|PSMD5|HLA-C|PSMD2|HLA-F|PSMD3|HLA-G|PSMD1|HLA-E|IKBKG|TLR2|CHUK|PSMA5|PSMA6|PSMA3|PSMA4|PSMA1|PSMA2|PSME3|PSME4|PSME1|HLA-A|PSME2|UBA52|B2M|PSMD10|PSMB11|PSMD12|PSMD11|PSMD14|LY96|PSMD13|SEC22B|PSMA7|PSMB10|PSMA8|CD14|PSMB6|TLR4|PSMB7|PSMB4|PSMB5|UBB|PSMB2|PSMB3|UBC|PSMB1|TAP2|PSMF1|TAP1|RPS27A|SHFM1|SNAP23|PSMB8|S…
SNRNP ASSEMBLY%REACTOME DATABASE ID RELEASE 73%191859	48	0.48802552	1.692802	0.0023241402	0.046199992	0.982																						10	Leishmania infection	255	-2.1793	0.001	0	ADORA2B|VAV1|VAV2|MYO10|RXFP1|RXFP2|MAPK8|C3AR1|FSHB|MYO5A|MC2R|GPR15|RELA|GPR27|GPR25|GPR20|PTH1R|GPR32|PTH2R|GPR45|GPR83|TSHB|MC1R|PTH2|AHCYL1|FSHR|CD163|NFKB1|MYO9B|PTHLH|GPR176|MC4R|ENTPD1|ACTG1|GPR150|GPHA2|CRH|ENTPD5|GPHB5|PTGER2|LHCGR|CRHR1|PTGDR|PTGER4|GPBAR1|PTH|RHBDF2|TSHR|MC3R|NPSR1|FCGR1A|NPS|CYSLTR2|MAPK14|MC5R|IGHG4|IGHG1|IGHG2|TXN|WASL|ACTB|VIPR1|VIPR2|GIPR|SCT|GHRHR|GLP2R|SCTR|GHR…
MITOCHONDRIAL PROTEIN IMPORT%REACTOME DATABASE ID RELEASE 73%1268020	56	0.46714368	1.670854	0.0032021957	0.056791164	0.9937																						15	Signal amplification	32	-1.8728	0.0169	0.0013	GNB2|P2RY12|GNB1|GNB4|GNB3|GNB5|GNA14|GNAQ|GNA15|GNGT1|GNA11|GNGT2|GNA13|AAMP|GNAI3|GNAI1|GNAI2|GNAT3|P2RY1|GNG3|GNG2|GNG5|TBXA2R|GNG4|GNG7|GNG8|MAPK14|PLA2G4A|GNG10|GNG12|GNG11|GNG13
REV-MEDIATED NUCLEAR EXPORT OF HIV RNA%REACTOME%R-HSA-165054.2	30	0.52843326	1.6694641	0.007562349	0.056452453	0.9945																						8	Ribosomal scanning and start codon recognition	59	1.783	0.0225	0.0003	EIF4A2|EIF4A1|RPS4Y2|RPS27L|RPS4Y1|RPS15A|RPS3|EIF2S2|EIF2S1|RPS26|EIF2S3|RPS25|RPS28|RPS27|EIF5|EIF1AX|EIF3M|EIF3K|EIF3L|EIF3I|EIF3J|EIF3G|EIF3H|EIF3E|EIF3F|EIF3C|EIF3D|EIF3A|EIF3B|RPS27A|RPS29|EIF4H|RPS20|FAU|RPS14|RPS21|RPS24|RPS23|RPS9|RPS7|RPS6|RPS15|RPS4X|EIF4E|EIF4B|RPS17|RPS16|RPS19|RPS18|EIF4G1|RPS11|RPS10|RPS2|RPS13|RPS12|RPS8|RPS5|RPSA|RPS3A
TRANSPORT OF THE SLBP INDEPENDENT MATURE MRNA%REACTOME%R-HSA-159227.2	29	0.53060913	1.6621895	0.007486979	0.05964084	0.9958																						4	RNA Polymerase III Abortive And Retractive Initiation	40	1.7952	0.0219	0.0016	POLR2K|POLR2L|SNAPC5|SNAPC1|SNAPC2|SNAPC3|SNAPC4|BDP1|GTF3C1|GTF3C2|GTF3C3|GTF3C4|GTF3C5|TBP|ZNF143|GTF3C6|POU2F1|BRF2|BRF1|GTF3A|CRCP|POLR1C|NFIX|SSB|POLR3GL|NFIA|NFIB|POLR3A|NFIC|POLR3B|POLR3C|POLR3D|POLR3E|POLR3F|POLR3G|POLR3H|POLR3K|POLR2E|POLR2F|POLR2H
																												14	rRNA processing	203	2.203	0.0001	0	UBA52|RCL1|TBL3|MPHOSPH10|RPS27A|NOL11|NOP10|DDX49|DDX47|WDR3|FCF1|NAT10|THUMPD1|PWP2|WDR46|CSNK1E|WDR43|RRP9|RPS14|TRMT112|FBL|UTP14A|UTP14C|UTP15|WDR36|RPS9|RPS7|IMP3|DIMT1|RPS6|WDR75|IMP4|DDX52|UTP11L|UTP18|DIEXF|CIRH1A|NHP2L1|DKC1|NHP2|EXOSC7|HEATR1|EXOSC6|NOP2|EXOSC5|TSR3|EXOSC4|NOC4L|EXOSC9|NOL6|EXOSC8|RRP7A|EXOSC3|EMG1|EXOSC2|PDCD11|EXOSC1|BMS1|GAR1|DHX37|WBSCR22|RRP36|UTP20|RPS2|NOP14|NOP…
																													FCERI mediated MAPK activation	34	-2.0077	0.0059	0	HRAS|VAV1|JUN|VAV2|NRAS|LYN|IGKV5-2|IGKV2-28|IGKV1-12|IGKV3D-20|IGKV2D-28|IGKV4-1|IGHE|IGKV2D-30|MAPK8|PAK2|SOS1|IGKV3-11|PLCG2|MAPK9|SYK|MAP2K7|PLCG1|MAP3K1|MAPK10|FOS|MAP2K4|RAC1|PAK1|VAV3|GRAP2|LCP2|MAPK1|MAPK3
Reactome pathways downregulated in responders at follow-up vs baseline	SIZE	ES	NES	NOM p-val	FDR q-val	FWER p-val																						26	EPH-Ephrin signaling	90	-2.0321	0.0046	0	ROCK1|WASL|YES1|ROCK2|VAV2|GRIN2B|TIAM1|ACTB|CFL1|LYN|ARHGEF7|EPHA5|EPHA4|EPHA7|NGEF|EPHA6|EPHA8|KALRN|ADAM10|CLTC|EFNA5|EFNA4|CLTA|MYH14|AP2A1|MYH11|EPHA1|MYH10|EPHA3|AP2A2|EPHA2|EFNA1|EFNA3|EPHA10|EFNA2|PSEN1|AP2M1|APH1A|APH1B|NCSTN|MYL6|DNM1|MYH9|CDC42|PAK1|ARPC1B|AP2S1|ARPC1A|CLTB|AP2B1|MYL12B|LIMK2|LIMK1|HRAS|GRIN1|RASA1|ACTG1|MMP2|FYN|MMP9|PTK2|EFNB3|RHOA|NCK2|PAK3|EPHB2|PSENEN|EPHB1|CLTCL1…
DISEASES OF IMMUNE SYSTEM%REACTOME DATABASE ID RELEASE 73%5260271	24	-0.70714617	-2.287271	0.0	0.0015784915	9.0E-4																						3	CDT1 association with the CDC6:ORC:origin complex	59	-1.6559	0.0548	0.0038	PSMC5|PSMC6|PSMC3|PSMC4|PSMC1|PSMC2|PSMD8|PSMD9|PSMD6|PSMD7|PSMD4|PSMD5|PSMD2|PSMD3|PSMD1|PSMA5|PSMA6|PSMA3|PSMA4|PSMA1|PSMA2|PSME3|PSME4|PSME1|PSME2|UBA52|PSMD10|PSMB11|PSMD12|PSMD11|PSMD14|PSMD13|PSMA7|PSMB10|PSMA8|PSMB6|PSMB7|PSMB4|PSMB5|UBB|PSMB2|PSMB3|UBC|MCM8|PSMB1|PSMF1|RPS27A|SHFM1|PSMB8|ORC5|PSMB9|ORC4|ORC6|ORC1|ORC3|ORC2|GMNN|CDT1|CDC6
REGULATION OF ACTIN DYNAMICS FOR PHAGOCYTIC CUP FORMATION%REACTOME DATABASE ID RELEASE 73%2029482	61	-0.57236326	-2.2864923	0.0	7.8924577E-4	9.0E-4																						14	rRNA processing in the nucleus and cytosol	193	2.1898	0.0001	0	UBA52|RCL1|TBL3|MPHOSPH10|RPS27A|NOL11|NOP10|DDX49|DDX47|WDR3|FCF1|NAT10|THUMPD1|PWP2|WDR46|CSNK1E|WDR43|RRP9|RPS14|TRMT112|FBL|UTP14A|UTP14C|UTP15|WDR36|RPS9|RPS7|IMP3|DIMT1|RPS6|WDR75|IMP4|DDX52|UTP11L|UTP18|DIEXF|CIRH1A|NHP2L1|DKC1|NHP2|EXOSC7|HEATR1|EXOSC6|NOP2|EXOSC5|TSR3|EXOSC4|NOC4L|EXOSC9|NOL6|EXOSC8|RRP7A|EXOSC3|EMG1|EXOSC2|PDCD11|EXOSC1|BMS1|GAR1|DHX37|WBSCR22|RRP36|UTP20|RPS2|NOP14|NOP…
DISEASES ASSOCIATED WITH THE TLR SIGNALING CASCADE%REACTOME%R-HSA-5602358.1	24	-0.70714617	-2.283402	0.0	6.4678554E-4	0.0011																						11	Sema4D induced cell migration and growth-cone collapse	20	-1.959	0.0089	0.0007	ROCK1|LIMK2|MYL12B|ROCK2|LIMK1|RHOC|MYL9|RHOB|MYL6|PLXNB1|MYH9|RND1|RHOA|ERBB2|ARHGEF11|SEMA4D|MYH14|MYH11|ARHGEF12|MYH10
FCGR3A-MEDIATED PHAGOCYTOSIS%REACTOME DATABASE ID RELEASE 73%9664422	58	-0.5712714	-2.2756236	0.0	5.7243125E-4	0.0013																						27	Complement cascade	67	-2.1859	0.0009	0	IGHG2|C8G|MBL2|F2|CR2|CD46|C1QB|CRP|C5AR2|C1QA|C5AR1|CPB2|COLEC10|C1S|CFH|SERPING1|C1R|IGKV5-2|CFI|C4B_2|C4A|CPN2|IGKV2-28|C2|IGKV1-12|CPN1|PROS1|VTN|IGKV3D-20|C6|C7|IGKV2D-28|C9|CD19|IGKV4-1|CD59|CD55|CFHR2|CFHR1|IGKV2D-30|CFHR4|C3AR1|CFHR3|CFHR5|C1QC|IGKV3-11|ELANE|C5|MASP1|COLEC11|CR1|C3|GZMM|CFB|CFD|CLU|FCN1|FCN2|FCN3|CD81|C4BPA|C4BPB|C8B|C8A|C4B|IGHG4|IGHG1
ANTIGEN PROCESSING-CROSS PRESENTATION%REACTOME%R-HSA-1236975.1	94	-0.5221036	-2.261885	0.0	6.008252E-4	0.0017																						2	Eukaryotic Translation Elongation	94	2.0021	0.0023	0	RPL37A|RPL24|RPL27|RPL26|RPL29|RPL28|RPS4Y2|RPL10|RPL12|RPL11|RPL36A|RPS27L|RPS4Y1|RPS15A|RPS3|RPL14|RPL13|RPL15|RPL18|RPL17|RPL19|RPL39L|RPL41|RPL35A|RPL23A|EEF2|RPL3L|RPS26|RPS25|RPS28|RPS27|EEF1A1|UBA52|RPS27A|RPS29|RPL27A|RPS20|RPL22L1|FAU|RPS14|RPS21|RPS24|RPL26L1|RPS23|RPL4|RPL5|RPL30|RPS9|RPL3|RPS7|RPL32|RPL31|RPLP1|RPS6|RPL34|RPL10L|RPLP0|RPL8|RPL10A|RPL9|RPL6|RPL7|RPS15|EEF1B2|RPS4X|RPL7…
LEISHMANIA PHAGOCYTOSIS%REACTOME%R-HSA-9664417.1	58	-0.5712714	-2.2610202	0.0	5.0068763E-4	0.0017																						24	MyD88 deficiency (TLR2 4)	10	-2.2054	0.0008	0	TLR1|CD14|TLR4|TLR2|TLR6|TIRAP|MYD88|LY96|BTK|CD36
BINDING AND UPTAKE OF LIGANDS BY SCAVENGER RECEPTORS%REACTOME DATABASE ID RELEASE 73%2173782	26	-0.68078536	-2.2562344	0.0	4.7903002E-4	0.0019																						3	Oxygen-dependent proline hydroxylation of Hypoxia-inducible Factor Alpha	66	-1.8277	0.021	0	PSMC5|PSMC6|PSMC3|PSMC4|PSMC1|PSMC2|UBE2D2|UBE2D3|UBE2D1|PSMD8|PSMD9|PSMD6|PSMD7|PSMD4|PSMD5|PSMD2|PSMD3|PSMD1|PSMA5|PSMA6|PSMA3|PSMA4|RBX1|PSMA1|PSMA2|PSME3|PSME4|PSME1|CUL2|PSME2|UBA52|PSMD10|PSMB11|PSMD12|PSMD11|PSMD14|PSMD13|PSMA7|PSMB10|PSMA8|PSMB6|PSMB7|PSMB4|PSMB5|UBB|PSMB2|PSMB3|UBC|PSMB1|PSMF1|RPS27A|SHFM1|PSMB8|PSMB9|LIMD1|EGLN1|EGLN3|EGLN2|WTIP|AJUBA|EPAS1|HIF1A|VHL|HIF3A|TCEB2|TCEB1
TOLL-LIKE RECEPTOR CASCADES%REACTOME DATABASE ID RELEASE 73%168898	134	-0.49046054	-2.2537177	0.0	4.84004E-4	0.0022																						3	Signaling by NOTCH4	81	-1.6314	0.0614	0.0035	MAML3|PSMC5|PSMC6|FLT4|PSMC3|SNW1|PSMC4|PSMC1|PSMC2|NOTCH2|EP300|TACC3|PSMD8|PSMD9|PSMD6|HES5|PSMD7|PSMD4|NOTCH4|PSMD5|PSMD2|PSMD3|PSMD1|ADAM10|SKP1|HEY1|PSMA5|PSMA6|HEY2|PSMA3|PSMA4|RBX1|PSMA1|PSEN1|PSMA2|PSME3|MAMLD1|PSME1|APH1A|PSME2|APH1B|UBA52|NCSTN|PSMD10|PSMD12|PSMD11|ACTA2|PSMD14|PSMD13|CUL1|PSMA7|PSMB10|PSMB6|PSMB7|PSMB4|PSMB5|UBB|PSMB2|PSMB3|UBC|PSMB1|PSMF1|RPS27A|SHFM1|PSMB8|PSMB9|HES1…
PARASITE INFECTION%REACTOME%R-HSA-9664407.1	58	-0.5712714	-2.2486887	0.0	4.4922702E-4	0.0023																						1	Toll Like Receptor 5 (TLR5) Cascade	84	-1.8399	0.0204	0	DUSP4|NFKBIA|JUN|NFKBIB|IKBKB|TAB3|UBE2N|TAB2|TAB1|APP|TRAF6|IKBKG|BTRC|MAP3K7|SKP1|UBE2V1|CHUK|MAPK8|FBXW11|ECSIT|RPS6KA3|MAP2K6|RPS6KA5|RPS6KA2|MEF2A|MAPK9|RPS6KA1|IRAK2|S100A12|MAP2K7|UBA52|MAP3K1|S100B|NFKB2|MAPK10|NKIRAS1|TNIP2|NKIRAS2|ATF1|FOS|MAP3K8|MAP2K3|CUL1|MAP2K4|HMGB1|TLR10|RELA|MAPKAPK3|TLR5|PELI1|PELI3|MAP2K1|PELI2|NOD1|NOD2|AGER|IRAK1|UBB|UBC|RIPK2|RPS27A|NFKB1|PPP2CA|PPP2CB|PPP2R…
FCGR ACTIVATION%REACTOME DATABASE ID RELEASE 73%2029481	16	-0.7682873	-2.2329392	0.0	5.092196E-4	0.0029																						1	Toll Like Receptor 7 8 (TLR7 8) Cascade	91	-1.8997	0.0142	0	DUSP4|NFKBIA|JUN|TLR9|NFKBIB|TLR8|IKBKB|TAB3|TLR7|UBE2N|TAB2|TAB1|APP|TRAF6|IKBKG|BTRC|MAP3K7|SKP1|UBE2V1|CHUK|MAPK8|FBXW11|ECSIT|RPS6KA3|MAP2K6|RPS6KA5|RPS6KA2|MEF2A|MAPK9|RPS6KA1|IRAK2|S100A12|MAP2K7|UBA52|MAP3K1|S100B|NFKB2|MAPK10|NKIRAS1|TNIP2|NKIRAS2|TICAM2|ATF1|FOS|MAP3K8|LY96|MAP2K3|CUL1|MAP2K4|HMGB1|TICAM1|RELA|MAPKAPK3|PELI1|PELI3|MAP2K1|PELI2|CD14|NOD1|TLR4|NOD2|AGER|IRAK1|UBB|UBC|RIPK2…
MYD88 DEFICIENCY (TLR2 4)%REACTOME%R-HSA-5602498.1	10	-0.88206816	-2.2053666	0.0	8.157131E-4	0.0051																							Binding and Uptake of Ligands by Scavenger Receptors	50	-2.2562	0.0005	0	APOL1|COL1A1|COL3A1|COL1A2|COL4A2|COL4A1|IGKV5-2|IGKV2-28|IGKV1-12|IGKV3D-20|IGKV2D-28|IGKV4-1|IGKV2D-30|IGKV3-11|SPARC|HP|HBB|JCHAIN|FTH1|STAB1|SCARF1|SCARA5|HBA2|HBA1|MASP1|FTL|COLEC12|COLEC11|HPR|APOA1|HPX|HSPH1|IGHA1|MSR1|ALB|CD163|AMBP|SSC5D|MARCO|SCGB3A2|HYOU1|CALR|HSP90B1|HSP90AA1|CD36|STAB2|LRP1|SAA1|APOE|APOB
SCAVENGING OF HEME FROM PLASMA%REACTOME DATABASE ID RELEASE 73%2168880	13	-0.8075169	-2.1991873	0.0	8.3597336E-4	0.0057																						2	Selenocysteine synthesis	93	1.9358	0.0056	0	RPL37A|RPL24|RPL27|RPL26|RPL29|RPL28|RPS4Y2|RPL10|SARS|RPL12|RPL11|RPL36A|RPS27L|RPS4Y1|RPS15A|RPS3|RPL14|RPL13|RPL15|RPL18|RPL17|RPL19|RPL39L|RPL41|RPL35A|RPL23A|RPL3L|RPS26|RPS25|RPS28|RPS27|SEPSECS|UBA52|PSTK|RPS27A|EEFSEC|RPS29|RPL27A|RPS20|RPL22L1|FAU|RPS14|RPS21|RPS24|RPL26L1|RPS23|RPL4|RPL5|RPL30|RPS9|RPL3|RPS7|RPL32|RPL31|RPLP1|RPS6|RPL34|RPL10L|RPLP0|RPL8|RPL10A|RPL9|RPL6|RPL7|RPS15|RPS4…
REGULATION OF COMPLEMENT CASCADE%REACTOME DATABASE ID RELEASE 73%977606	24	-0.67625713	-2.1871557	0.0	9.4349444E-4	0.007																						1	Toll Like Receptor 2 (TLR2) Cascade	94	-2.0416	0.0042	0	DUSP4|NFKBIA|JUN|NFKBIB|IKBKB|TAB3|UBE2N|TAB2|TAB1|TLR1|APP|SOCS1|TRAF6|IKBKG|BTRC|TLR2|MAP3K7|SKP1|UBE2V1|CHUK|MAPK8|FBXW11|ECSIT|RPS6KA3|MAP2K6|RPS6KA5|RPS6KA2|MEF2A|MAPK9|RPS6KA1|IRAK2|S100A12|MAP2K7|UBA52|MAP3K1|S100B|NFKB2|MAPK10|NKIRAS1|TNIP2|NKIRAS2|ATF1|FOS|MAP3K8|LY96|MAP2K3|CUL1|MAP2K4|IRAK3|HMGB1|SIGIRR|RELA|MAPKAPK3|PELI1|PELI3|MAP2K1|PELI2|CD14|NOD1|TLR4|NOD2|AGER|IRAK1|UBB|UBC|RIPK2…
COMPLEMENT CASCADE%REACTOME DATABASE ID RELEASE 73%166658	27	-0.649993	-2.185893	0.0	9.262936E-4	0.0074																						15	Thrombin signalling through proteinase activated receptors (PARs)	31	-1.8588	0.0184	0.0028	F2R|GNB2|GNB1|F2|GNB4|GNB3|GNB5|GNA14|GNAQ|GNA15|GNGT1|GNA11|GNGT2|GNA13|GNG3|GNG2|GNG5|GNG4|GNA12|GNG7|ARRB1|GNG8|ARRB2|GNG10|F2RL2|F2RL3|GNG12|GNG11|MAPK1|GNG13|MAPK3
LEISHMANIA INFECTION%REACTOME DATABASE ID RELEASE 73%9658195	150	-0.4671653	-2.1792674	0.0	0.001005971	0.0086																						1	MyD88-independent TLR4 cascade	96	-1.8395	0.0203	0	DUSP4|NFKBIA|JUN|RIPK1|UBE2D2|UBE2D3|NFKBIB|UBE2D1|IKBKB|TAB3|UBE2N|TAB2|TAB1|BIRC2|APP|BIRC3|TRAF6|IKBKG|BTRC|MAP3K7|SKP1|UBE2V1|CHUK|MAPK8|FBXW11|RPS6KA3|MAP2K6|RPS6KA5|RPS6KA2|MEF2A|MAPK9|RPS6KA1|IRAK2|S100A12|MAP2K7|RIPK3|UBA52|S100B|NFKB2|MAPK10|NKIRAS1|TNIP2|NKIRAS2|TICAM2|ATF1|FOS|MAP3K8|LY96|MAP2K3|CUL1|MAP2K4|HMGB1|TICAM1|CASP8|RELA|MAPKAPK3|FADD|MAP2K1|CD14|NOD1|TLR4|NOD2|AGER|IRAK1|UBB…
IRAK4 DEFICIENCY (TLR2 4)%REACTOME DATABASE ID RELEASE 73%5603041	11	-0.83719206	-2.1762984	2.392917E-4	9.988414E-4	0.0091																						7	Mitochondrial translation termination	87	1.8229	0.019	0	DAP3|MRPS35|MRPS36|MRPS33|MRPL18|MRPS34|MRPL19|MRPL16|MRPS31|MRPL17|MRPL14|MRPS30|MRPL15|MRPL12|MRPL13|MRPL57|MRPL54|MRPL10|MRPL11|MRPL55|MRPL20|ICT1|GADD45GIP1|PTCD3|MRPL27|MRPL28|ERAL1|MRPL23|MRPL24|MRPL21|MRPL22|MRPL30|MRPS17|MRPS15|MRPS16|MRPS14|MRPS11|MRPS12|GFM2|MRRF|MTRF1L|MRPL38|MRPL39|MRPS10|MRPL36|MRPL37|MRPL34|MRPL35|MRPL32|MRPL33|MRPL41|MRPL4|MRPL3|MRPL42|MRPL2|MRPL40|MRPL1|MRPL9|CHCH…
PLATELET DEGRANULATION%REACTOME%R-HSA-114608.3	83	-0.504642	-2.1498601	0.0	0.0016305539	0.0157																							Detoxification of Reactive Oxygen Species	34	-2.1314	0.0019	0.0003	ERO1L|TXN|ATOX1|GPX2|PRDX2|CYCS|GPX1|PRDX1|GPX3|GPX6|CYBA|GPX5|GPX8|GPX7|SOD1|AQP8|ATP7A|CAT|TXN2|SOD3|NUDT2|CCS|TXNRD1|SOD2|PRDX3|PRDX6|NOX4|NOX5|P4HB|CYBB|NCF1|NCF2|GSTP1|NCF4
PLATELET ACTIVATION, SIGNALING AND AGGREGATION%REACTOME DATABASE ID RELEASE 73%76002	183	-0.4469938	-2.1393518	0.0	0.0017331997	0.0177																						6	Regulation of actin dynamics for phagocytic cup formation	70	-2.2865	0.0008	0	IGHG2|WASL|VAV1|NF2|VAV2|ACTB|CFL1|MYO10|IGKV5-2|IGKV2-28|IGKV1-12|IGKV3D-20|IGKV2D-28|IGKV4-1|CYFIP2|CYFIP1|IGKV2D-30|NCKAP1|WIPF1|WIPF2|WIPF3|IGKV3-11|WAS|BRK1|NCKIPSD|NCKAP1L|WASF1|WASF2|WASF3|BAIAP2|ABI2|MYO5A|HSP90AB1|ABI1|MYH9|CDC42|CD3G|PAK1|ARPC1B|ARPC1A|MYH2|LIMK1|MYO9B|ACTG1|ABL1|MYO1C|PTK2|BTK|HSP90AA1|FCGR1A|SYK|FCGR3A|ARPC4|FCGR2A|ARPC5|ARPC2|ELMO1|ARPC3|ELMO2|DOCK1|CRK|NCK1|ACTR3|AC…
DETOXIFICATION OF REACTIVE OXYGEN SPECIES%REACTOME%R-HSA-3299685.5	24	-0.6653109	-2.1314044	2.5523227E-4	0.0018938307	0.0203																						4	RNA Polymerase III Transcription Initiation	35	1.9298	0.0058	0	POLR2K|POLR2L|SNAPC5|SNAPC1|SNAPC2|SNAPC3|SNAPC4|BDP1|GTF3C1|GTF3C2|GTF3C3|GTF3C4|GTF3C5|TBP|ZNF143|GTF3C6|POU2F1|BRF2|BRF1|GTF3A|CRCP|POLR1C|POLR3GL|POLR3A|POLR3B|POLR3C|POLR3D|POLR3E|POLR3F|POLR3G|POLR3H|POLR3K|POLR2E|POLR2F|POLR2H
REGULATION OF TLR BY ENDOGENOUS LIGAND%REACTOME%R-HSA-5686938.3	10	-0.84491163	-2.1236644	0.0	0.0020457706	0.0229																						1	Toll Like Receptor 9 (TLR9) Cascade	95	-1.8663	0.0177	0	DUSP4|NFKBIA|JUN|TLR9|NFKBIB|TLR8|IKBKB|TAB3|TLR7|UBE2N|TAB2|TAB1|APP|TRAF6|IKBKG|BTRC|MAP3K7|SKP1|UBE2V1|CHUK|MAPK8|FBXW11|ECSIT|RPS6KA3|MAP2K6|RPS6KA5|RPS6KA2|MEF2A|MAPK9|RPS6KA1|IRAK2|S100A12|MAP2K7|UBA52|MAP3K1|S100B|NFKB2|MAPK10|NKIRAS1|TNIP2|NKIRAS2|TICAM2|ATF1|FOS|MAP3K8|LY96|MAP2K3|CUL1|MAP2K4|HMGB1|TICAM1|RELA|MAPKAPK3|PELI1|PIK3R4|PELI3|MAP2K1|PELI2|CD14|NOD1|TLR4|NOD2|RBSN|AGER|IRAK1|U…
RESPONSE TO ELEVATED PLATELET CYTOSOLIC CA2+%REACTOME DATABASE ID RELEASE 73%76005	87	-0.494661	-2.1133466	0.0	0.0022939965	0.0269																						5	Activation of G protein gated Potassium channels	29	-1.8369	0.0201	0.0034	GABBR1|KCNJ10|GNB2|GNB1|KCNJ9|GNB4|GNB3|KCNJ15|KCNJ16|GNB5|GNGT1|GNGT2|GNG3|GNG2|GNG5|GNG4|GNG7|GNG8|KCNJ4|KCNJ12|KCNJ2|GNG10|KCNJ3|GNG12|KCNJ5|GNG11|GABBR2|GNG13|KCNJ6
ER-PHAGOSOME PATHWAY%REACTOME%R-HSA-1236974.4	80	-0.49822018	-2.0957398	0.0	0.00285074	0.0349																							Interleukin-10 signaling	46	-2.0061	0.0059	0.0005	PTAFR|TIMP1|TNF|CCL3L1|CCL3L3|IL6|CSF3|IL12A|CSF1|JAK1|IL10RB|ICAM1|TNFRSF1B|CCR5|IL10|TNFRSF1A|IL10RA|CSF2|CXCL10|FCER2|CXCL8|CXCL1|CCR2|CXCL2|IL1A|IL1B|IL1RN|IL18|IL1R1|FPR1|IL1R2|CCL19|LIF|CD86|CD80|CCL22|CCL20|STAT3|PTGS2|CCL5|CCL4|CCR1|CCL3|IL12B|CCL2|TYK2
FCGAMMA RECEPTOR (FCGR) DEPENDENT PHAGOCYTOSIS%REACTOME DATABASE ID RELEASE 73%2029480	82	-0.49451634	-2.0907607	0.0	0.0029785775	0.0381																						2	L13a-mediated translational silencing of Ceruloplasmin expression	112	2.0421	0.0017	0	EIF4A2|RPL37A|EIF4A1|RPL24|RPL27|RPL26|RPL29|RPL28|RPS4Y2|RPL10|RPL12|RPL11|RPL36A|RPS27L|RPS4Y1|RPS15A|RPS3|RPL14|RPL13|RPL15|RPL18|RPL17|RPL19|RPL39L|RPL41|RPL35A|RPL23A|RPL3L|RPS26|RPS25|RPS28|RPS27|UBA52|EIF1AX|EIF3M|EIF3K|EIF3L|EIF3I|EIF3J|EIF3G|EIF3H|EIF3E|EIF3F|EIF3C|EIF3D|EIF3A|EIF3B|RPS27A|RPS14|RPS9|RPS7|RPS6|EIF4E|EIF4B|EIF4G1|RPS2|PABPC1|EIF2S2|EIF2S1|EIF2S3|RPS29|RPL27A|EIF4H|RPS20|R…
INITIAL TRIGGERING OF COMPLEMENT%REACTOME DATABASE ID RELEASE 73%166663	11	-0.80894077	-2.0889213	0.0	0.002971274	0.0397																						1	Toll-like Receptor Cascades	149	-2.2537	0.0005	0	NFKBIA|JUN|NFKBIB|IKBKB|UBE2N|TLR1|BPI|APP|SOCS1|S100A9|TRAF6|IKBKG|S100A8|BTRC|TLR2|MAP3K7|SKP1|UBE2V1|CHUK|MAPK8|FBXW11|RPS6KA3|MAP2K6|PLCG2|RPS6KA5|RPS6KA2|RPS6KA1|RIPK3|UBA52|NFKB2|NKIRAS1|NKIRAS2|TICAM2|TLR3|FOS|LY96|CUL1|TICAM1|HMGB1|CASP8|RELA|PIK3R4|FADD|MAP2K1|CD14|TLR4|RBSN|IRAK1|UBB|PIK3C3|DNM2|S100A1|UBC|CD180|LY86|RPS27A|NFKB1|PPP2CA|PPP2CB|PPP2R1B|PPP2R1A|ITGAM|EEA1|ITGB2|ELK1|HSP90…
ANTIMICROBIAL PEPTIDES%REACTOME%R-HSA-6803157.2	26	-0.6309645	-2.075316	0.0	0.0034118074	0.0472																						13	CLEC7A (Dectin-1) signaling	96	-1.6183	0.0649	0.0007	NFKBIA|PSMC5|PSMC6|PSMC3|PSMC4|PSMC1|PSMC2|UBE2D2|UBE2D1|IKBKB|TAB3|PSMD8|UBE2N|TAB2|PSMD9|PSMD6|TAB1|PSMD7|PSMD4|MAP3K14|PDPK1|PSMD5|PSMD2|CDC34|PSMD3|PSMD1|TRAF6|IKBKG|BTRC|MAP3K7|SKP1|UBE2V1|CHUK|FBXW11|NFATC2|PSMA5|PSMA6|PSMA3|PSMA4|PSMA1|PLCG2|PSMA2|PSME3|PSME4|PSME1|PSME2|UBA52|CARD11|NFKB2|PSMD10|PPP3R1|PSMB11|PSMD12|PSMD11|PSMD14|PSMD13|CUL1|BCL10|MALT1|CASP8|RELA|PPP3CB|PSMA7|PSMB10|PSMA…
AMYLOID FIBER FORMATION%REACTOME DATABASE ID RELEASE 73%977225	33	-0.5910319	-2.0682492	0.0	0.003726497	0.0532																						13	FCERI mediated NF-kB activation	87	-1.5941	0.0691	0.0026	NFKBIA|PSMC5|PSMC6|PSMC3|PSMC4|PSMC1|PSMC2|UBE2D2|LYN|UBE2D1|IKBKB|IGKV5-2|TAB3|PSMD8|UBE2N|TAB2|PSMD9|PSMD6|IGKV2-28|TAB1|PSMD7|IGKV1-12|PSMD4|PDPK1|PSMD5|IGKV3D-20|PSMD2|CDC34|PSMD3|IGKV2D-28|PSMD1|TRAF6|IKBKG|IGKV4-1|BTRC|IGHE|MAP3K7|PRKCQ|SKP1|UBE2V1|CHUK|IGKV2D-30|FBXW11|RASGRP2|RASGRP1|PSMA5|RASGRP4|PSMA6|IGKV3-11|PSMA3|PSMA4|PSMA1|PSMA2|PSME3|PSME4|PSME1|PSME2|UBA52|CARD11|PSMD10|PSMB11|PS…
CHK1 CHK2(CDS1) MEDIATED INACTIVATION OF CYCLIN B:CDK1 COMPLEX%REACTOME%R-HSA-75035.4	12	-0.77906126	-2.0674145	0.0	0.003640336	0.054																						7	Mitochondrial translation initiation	87	1.7711	0.0233	0.0004	DAP3|MRPS35|MRPS36|MRPS33|MRPL18|MRPS34|MRPL19|MRPL16|MRPS31|MRPL17|MRPL14|MRPS30|MRPL15|MRPL12|MRPL13|MRPL57|MRPL54|MRPL10|MRPL11|MRPL55|MRPL20|ICT1|GADD45GIP1|PTCD3|MRPL27|MRPL28|ERAL1|MRPL23|MRPL24|MRPL21|MRPL22|MRPL30|MRPS17|MRPS15|MRPS16|MRPS14|MRPS11|MRPS12|MRPL38|MRPL39|MRPS10|MTFMT|MRPL36|MTIF2|MRPL37|MTIF3|MRPL34|MRPL35|MRPL32|MRPL33|MRPL41|MRPL4|MRPL3|MRPL42|MRPL2|MRPL40|MRPL1|MRPL9|CHC…
TOLL LIKE RECEPTOR 4 (TLR4) CASCADE%REACTOME DATABASE ID RELEASE 73%166016	116	-0.45717937	-2.0573657	0.0	0.0040685954	0.0625																							Interferon gamma signaling	90	-2.0506	0.0042	0	PTAFR|PML|IFI30|JAK1|ICAM1|TRIM29|TRIM26|SUMO1|TRIM22|GBP6|GBP5|GBP7|HLA-B|HLA-C|PIAS1|HLA-F|SOCS1|HLA-G|HLA-E|TRIM17|TRIM14|TRIM10|HLA-DQA2|HLA-DQA1|HLA-DRB5|HLA-DRB4|HLA-DRB3|HLA-DRB1|CAMK2B|CAMK2D|HLA-A|B2M|CAMK2A|TRIM8|IFNGR1|TRIM6|IFNGR2|SOCS3|TRIM5|TRIM2|TRIM3|HLA-DPA1|HLA-DQB2|CAMK2G|HLA-DQB1|SP100|HLA-DPB1|NCAM1|MID1|IFNG|VCAM1|HLA-DRA|CIITA|PTPN1|OASL|TRIM68|TRIM62|JAK2|OAS1|IRF4|OAS2|OA…
SMOOTH MUSCLE CONTRACTION%REACTOME DATABASE ID RELEASE 73%445355	27	-0.6164661	-2.0538917	0.0	0.004145635	0.0659																						6	Leishmania phagocytosis	67	-2.261	0.0005	0	IGHG2|WASL|YES1|VAV1|VAV2|ACTB|MYO10|LYN|IGKV5-2|IGKV2-28|IGKV1-12|IGKV3D-20|IGKV2D-28|IGKV4-1|CYFIP2|CYFIP1|IGKV2D-30|NCKAP1|WIPF1|WIPF2|WIPF3|IGKV3-11|WAS|BRK1|NCKIPSD|NCKAP1L|WASF1|WASF2|WASF3|BAIAP2|ABI2|MYO5A|ABI1|MYH9|FGR|CDC42|CD3G|ARPC1B|ARPC1A|MYH2|MYO9B|ACTG1|ABL1|MYO1C|FYN|PTK2|HCK|BTK|SYK|FCGR3A|ARPC4|ARPC5|ARPC2|ELMO1|ARPC3|ELMO2|DOCK1|CRK|NCK1|ACTR3|ACTR2|RAC1|VAV3|IGHG4|MAPK1|IGHG1…
INTERFERON GAMMA SIGNALING%REACTOME%R-HSA-877300.2	75	-0.492527	-2.0506468	0.0	0.004230384	0.0695																						1	MyD88 cascade initiated on plasma membrane	84	-1.8389	0.0202	0.0003	DUSP4|NFKBIA|JUN|NFKBIB|IKBKB|TAB3|UBE2N|TAB2|TAB1|APP|TRAF6|IKBKG|BTRC|MAP3K7|SKP1|UBE2V1|CHUK|MAPK8|FBXW11|ECSIT|RPS6KA3|MAP2K6|RPS6KA5|RPS6KA2|MEF2A|MAPK9|RPS6KA1|IRAK2|S100A12|MAP2K7|UBA52|MAP3K1|S100B|NFKB2|MAPK10|NKIRAS1|TNIP2|NKIRAS2|ATF1|FOS|MAP3K8|MAP2K3|CUL1|MAP2K4|HMGB1|TLR10|RELA|MAPKAPK3|TLR5|PELI1|PELI3|MAP2K1|PELI2|NOD1|NOD2|AGER|IRAK1|UBB|UBC|RIPK2|RPS27A|NFKB1|PPP2CA|PPP2CB|PPP2R…
MYD88:MAL(TIRAP) CASCADE INITIATED ON PLASMA MEMBRANE%REACTOME%R-HSA-166058.3	90	-0.47506392	-2.04884	0.0	0.0041971286	0.0711																						12	Activated NOTCH1 Transmits Signal to the Nucleus	31	-1.961	0.0089	0.001	RPS27A|NEURL1|NEURL1B|JAG2|DLL4|JAG1|NOTCH1|DLL1|MIB1|ADAM10|DNER|ADAM17|PSENEN|DTX4|ITCH|PSEN2|DTX1|DTX2|PSEN1|DLK1|APH1A|APH1B|UBA52|NCSTN|ARRB1|ARRB2|CNTN1|MIB2|UBB|UBC|NUMB
TOLL LIKE RECEPTOR TLR1:TLR2 CASCADE%REACTOME%R-HSA-168179.1	90	-0.47506392	-2.0450397	0.0	0.00427265	0.0746																						6	FCGR3A-mediated phagocytosis	67	-2.2756	0.0006	0	IGHG2|WASL|YES1|VAV1|VAV2|ACTB|MYO10|LYN|IGKV5-2|IGKV2-28|IGKV1-12|IGKV3D-20|IGKV2D-28|IGKV4-1|CYFIP2|CYFIP1|IGKV2D-30|NCKAP1|WIPF1|WIPF2|WIPF3|IGKV3-11|WAS|BRK1|NCKIPSD|NCKAP1L|WASF1|WASF2|WASF3|BAIAP2|ABI2|MYO5A|ABI1|MYH9|FGR|CDC42|CD3G|ARPC1B|ARPC1A|MYH2|MYO9B|ACTG1|ABL1|MYO1C|FYN|PTK2|HCK|BTK|SYK|FCGR3A|ARPC4|ARPC5|ARPC2|ELMO1|ARPC3|ELMO2|DOCK1|CRK|NCK1|ACTR3|ACTR2|RAC1|VAV3|IGHG4|MAPK1|IGHG1…
INTERFERON ALPHA BETA SIGNALING%REACTOME%R-HSA-909733.2	49	-0.53440183	-2.0440164	0.0	0.004189756	0.0753																						3	Hh mutants that don't undergo autocatalytic processing are degraded by ERAD	56	-1.7552	0.0331	0.0006	SHH|PSMC5|PSMC6|PSMC3|PSMC4|PSMC1|VCP|PSMC2|SEL1L|PSMD8|PSMD9|PSMD6|PSMD7|PSMD4|PSMD5|PSMD2|PSMD3|PSMD1|PSMA5|PSMA6|PSMA3|PSMA4|PSMA1|PSMA2|PSME3|PSME4|PSME1|PSME2|UBA52|PSMD10|PSMB11|PSMD12|PSMD11|PSMD14|PSMD13|PSMA7|PSMB10|PSMA8|PSMB6|PSMB7|PSMB4|PSMB5|UBB|PSMB2|PSMB3|UBC|PSMB1|PSMF1|RPS27A|SHFM1|PSMB8|PSMB9|DERL2|ERLEC1|OS9|SYVN1
TOLL LIKE RECEPTOR 2 (TLR2) CASCADE%REACTOME%R-HSA-181438.1	90	-0.47506392	-2.0415812	0.0	0.0042254925	0.0781																						5	GABA receptor activation	60	-1.8287	0.021	0.0018	GABBR1|KCNJ10|GABRA6|KCNJ9|GABRA5|GABRA4|GABRA3|ARHGEF9|KCNJ15|KCNJ16|ADCY4|ADCY3|ADCY2|ADCY1|ADCY8|ADCY7|ADCY6|ADCY5|GNAL|ADCY9|GNAT3|KCNJ4|KCNJ12|KCNJ2|GNG10|GNG12|GNG11|GNG13|GNB2|GNB1|GNB4|GNB3|GNB5|GNGT1|GNGT2|GNAI3|GNAI1|GNAI2|GNG3|GNG2|GNG5|GNG4|GNG7|GNG8|GABRB3|GABRB2|GABRB1|GABRR3|GABRR2|GABRR1|NPTN|GABRG3|GABRG2|KCNJ3|GABRA2|GABRQ|KCNJ5|GABBR2|GABRA1|KCNJ6
TOLL LIKE RECEPTOR TLR6:TLR2 CASCADE%REACTOME%R-HSA-168188.1	90	-0.47506392	-2.0381627	0.0	0.0042794794	0.0814																						1	TRIF(TICAM1)-mediated TLR4 signaling	96	-1.8432	0.0199	0.0003	DUSP4|NFKBIA|JUN|RIPK1|UBE2D2|UBE2D3|NFKBIB|UBE2D1|IKBKB|TAB3|UBE2N|TAB2|TAB1|BIRC2|APP|BIRC3|TRAF6|IKBKG|BTRC|MAP3K7|SKP1|UBE2V1|CHUK|MAPK8|FBXW11|RPS6KA3|MAP2K6|RPS6KA5|RPS6KA2|MEF2A|MAPK9|RPS6KA1|IRAK2|S100A12|MAP2K7|RIPK3|UBA52|S100B|NFKB2|MAPK10|NKIRAS1|TNIP2|NKIRAS2|TICAM2|ATF1|FOS|MAP3K8|LY96|MAP2K3|CUL1|MAP2K4|HMGB1|TICAM1|CASP8|RELA|MAPKAPK3|FADD|MAP2K1|CD14|NOD1|TLR4|NOD2|AGER|IRAK1|UBB…
EPH-EPHRIN SIGNALING%REACTOME DATABASE ID RELEASE 73%2682334	66	-0.49759626	-2.0320807	0.0	0.004633949	0.0901																						5	G protein gated Potassium channels	29	-1.8443	0.02	0.0046	GABBR1|KCNJ10|GNB2|GNB1|KCNJ9|GNB4|GNB3|KCNJ15|KCNJ16|GNB5|GNGT1|GNGT2|GNG3|GNG2|GNG5|GNG4|GNG7|GNG8|KCNJ4|KCNJ12|KCNJ2|GNG10|KCNJ3|GNG12|KCNJ5|GNG11|GABBR2|GNG13|KCNJ6
ADVANCED GLYCOSYLATION ENDPRODUCT RECEPTOR SIGNALING%REACTOME%R-HSA-879415.1	12	-0.760694	-2.0244346	4.8285854E-4	0.0050196205	0.0995																						5	Inwardly rectifying K+ channels	35	-1.8499	0.0193	0.0034	GABBR1|KCNJ10|GNB2|GNB1|KCNJ9|GNB4|KCNJ1|GNB3|KCNJ15|KCNJ16|GNB5|GNGT1|GNGT2|KCNJ11|GNG3|GNG2|GNG5|GNG4|GNG7|GNG8|KCNJ4|KCNJ12|KCNJ14|KCNJ8|KCNJ2|GNG10|ABCC8|KCNJ3|GNG12|KCNJ5|GNG11|GABBR2|ABCC9|GNG13|KCNJ6
FCGR3A-MEDIATED IL10 SYNTHESIS%REACTOME%R-HSA-9664323.1	34	-0.5685447	-2.022074	5.3319114E-4	0.0050489167	0.1027																							rRNA modification in the nucleus and cytosol	60	2.0148	0.002	0	RCL1|TBL3|MPHOSPH10|NOL11|NOP10|DDX49|DDX47|WDR3|FCF1|NAT10|THUMPD1|PWP2|WDR46|WDR43|RRP9|RPS14|TRMT112|FBL|UTP14A|UTP14C|UTP15|WDR36|RPS9|RPS7|IMP3|DIMT1|RPS6|WDR75|IMP4|DDX52|UTP11L|UTP18|DIEXF|CIRH1A|NHP2L1|DKC1|NHP2|DCAF13|HEATR1|NOP2|TSR3|NOC4L|NOL6|RRP7A|EMG1|PDCD11|BMS1|GAR1|DHX37|WBSCR22|RRP36|UTP20|NOP56|RPS2|NOP14|NOP58|UTP6|KRR1|UTP3|PNO1
INFECTION WITH MYCOBACTERIUM TUBERCULOSIS%REACTOME%R-HSA-9635486.2	26	-0.60616106	-2.0086443	0.0	0.005960282	0.1235																						2	Response of EIF2AK4 (GCN2) to amino acid deficiency	102	1.7487	0.0283	0.0004	RPL37A|RPL24|RPL27|RPL26|RPL29|RPL28|RPS4Y2|RPL10|RPL12|RPL11|RPL36A|RPS27L|RPS4Y1|RPS15A|RPS3|RPL14|RPL13|RPL15|RPL18|RPL17|RPL19|RPL39L|RPL41|RPL35A|RPL23A|RPL3L|RPS26|RPS25|RPS28|RPS27|UBA52|RPS27A|RPS14|CEBPB|TRIB3|RPS9|RPS7|RPS6|RPS2|ASNS|EIF2S2|EIF2S1|EIF2S3|ATF3|ATF4|EIF2AK4|RPS29|RPL27A|RPS20|RPL22L1|FAU|RPS21|RPS24|ATF2|RPL26L1|RPS23|RPL4|RPL5|IMPACT|RPL30|RPL3|RPL32|CEBPG|RPL31|RPLP1|RP…
FCERI MEDIATED MAPK ACTIVATION%REACTOME%R-HSA-2871796.2	28	-0.59928095	-2.007709	0.0	0.005891791	0.1249																						5	Activation of GABAB receptors	43	-1.8346	0.0203	0.0048	GABBR1|KCNJ10|GNB2|GNB1|KCNJ9|GNB4|GNB3|KCNJ15|KCNJ16|GNB5|GNGT1|GNGT2|ADCY4|ADCY3|ADCY2|ADCY1|ADCY8|ADCY7|ADCY6|ADCY5|GNAL|GNAI3|GNAI1|ADCY9|GNAI2|GNAT3|GNG3|GNG2|GNG5|GNG4|GNG7|GNG8|KCNJ4|KCNJ12|KCNJ2|GNG10|KCNJ3|GNG12|KCNJ5|GNG11|GABBR2|GNG13|KCNJ6
INTERLEUKIN-10 SIGNALING%REACTOME%R-HSA-6783783.3	30	-0.58764386	-2.0061111	5.226026E-4	0.0058779363	0.1273																						2	Cap-dependent Translation Initiation	120	2.0858	0.001	0	EIF4A2|RPL37A|EIF4A1|RPL24|RPL27|RPL26|RPL29|RPL28|RPS4Y2|RPL10|RPL12|RPL11|RPL36A|RPS27L|RPS4Y1|RPS15A|RPS3|RPL14|RPL13|RPL15|RPL18|RPL17|RPL19|RPL39L|RPL41|RPL35A|RPL23A|RPL3L|RPS26|RPS25|RPS28|RPS27|UBA52|EIF1AX|EIF3M|EIF3K|EIF3L|EIF3I|EIF3J|EIF3G|EIF3H|EIF3E|EIF3F|EIF3C|EIF3D|EIF3A|EIF3B|RPS27A|RPS14|RPS9|RPS7|RPS6|EIF4EBP1|EIF4E|EIF4B|EIF4G1|RPS2|PABPC1|EIF2S2|EIF2S1|EIF2S3|EIF5|EIF2B5|EIF2B…
RHO GTPASES ACTIVATE ROCKS%REACTOME%R-HSA-5627117.2	17	-0.6850981	-2.0057654	2.4551927E-4	0.005779916	0.1282																						27	Regulation of Complement cascade	57	-2.1872	0.0009	0	IGHG2|C8G|F2|CR2|CD46|C1QB|C5AR2|C1QA|C5AR1|CPB2|C1S|CFH|SERPING1|C1R|IGKV5-2|CFI|C4B_2|C4A|CPN2|IGKV2-28|C2|IGKV1-12|CPN1|PROS1|VTN|IGKV3D-20|C6|C7|IGKV2D-28|C9|CD19|IGKV4-1|CD59|CD55|CFHR2|CFHR1|IGKV2D-30|CFHR4|C3AR1|CFHR3|CFHR5|C1QC|IGKV3-11|ELANE|C5|CR1|C3|CFB|CLU|CD81|C4BPA|C4BPB|C8B|C8A|C4B|IGHG4|IGHG1
RHO GTPASES ACTIVATE PKNS%REACTOME%R-HSA-5625740.1	27	-0.5988293	-1.9969971	5.197505E-4	0.006271964	0.1416																							Initial triggering of complement	32	-2.0889	0.003	0	IGHG2|MBL2|C1QB|CRP|C1QA|COLEC10|C1S|C1R|IGKV5-2|C3|GZMM|C4A|C4B_2|IGKV2-28|CFB|C2|CFD|IGKV1-12|IGKV3D-20|IGKV2D-28|IGKV4-1|IGKV2D-30|C1QC|IGKV3-11|FCN1|FCN2|FCN3|MASP1|COLEC11|C4B|IGHG4|IGHG1
ZBP1(DAI) MEDIATED INDUCTION OF TYPE I IFNS%REACTOME%R-HSA-1606322.1	20	-0.6504405	-1.9923347	5.16129E-4	0.0065362435	0.1506																						9	Platelet degranulation	124	-2.1499	0.0016	0	CD9|CD109|APP|ISLR|CHID1|SERPINF2|GTPBP2|SYTL4|TLN1|NHLRC2|VCL|ENDOD1|ITGB3|A1BG|ITGA2B|CYB5R1|VTI1B|F8|APOOL|SPARC|HRG|PFN1|FERMT3|SERPINA3|SERPINA4|TMSB4X|CAP1|TIMP3|FLNA|ANXA5|FN1|PPBP|APOA1|PCYOX1L|FAM49B|LAMP2|SCCPDH|WDR1|CFD|SCG3|CLU|PHACTR2|ITIH4|ITIH3|TTN|TGFB1|CLEC3B|ACTN2|CDC37L1|EGF|IGF2|IGF1|CALU|PCDH7|SERPINA1|SERPINE1|HABP4|PDGFB|QSOX1|AHSG|ACTN1|ACTN4|SEPP1|HGF|GAS6|TAGLN2|A2M|VEGF…
LEISHMANIA PARASITE GROWTH AND SURVIVAL%REACTOME%R-HSA-9664433.1	79	-0.47341874	-1.9908878	0.0	0.0064845122	0.1525																						4	RNA Polymerase III Transcription Initiation From Type 3 Promoter	27	1.7717	0.0237	0.003	POLR2K|POLR2L|SNAPC5|SNAPC1|SNAPC2|SNAPC3|SNAPC4|BDP1|TBP|ZNF143|POU2F1|BRF2|CRCP|POLR1C|POLR3GL|POLR3A|POLR3B|POLR3C|POLR3D|POLR3E|POLR3F|POLR3G|POLR3H|POLR3K|POLR2E|POLR2F|POLR2H
ANTI-INFLAMMATORY RESPONSE FAVOURING LEISHMANIA PARASITE INFECTION%REACTOME%R-HSA-9662851.1	79	-0.47341874	-1.981276	0.0	0.0072385855	0.1715																						22	Interleukin-1 signaling	101	-1.8787	0.0161	0	NFKBIA|PSMC5|PSMC6|PSMC3|PSMC4|PSMC1|TOLLIP|PSMC2|NFKBIB|IKBKB|PSMD8|UBE2N|PSMD9|PSMD6|PSMD7|PSMD4|APP|PSMD5|PSMD2|PSMD3|PSMD1|TRAF6|IKBKG|BTRC|MAP3K7|SKP1|UBE2V1|CHUK|FBXW11|PSMA5|PSMA6|PSMA3|PSMA4|PSMA1|MAP2K6|PSMA2|PSME3|PSME4|IL1RN|PSME1|PSME2|UBA52|IL1R1|NFKB2|IL1R2|PSMD10|NKIRAS1|PSMB11|NKIRAS2|PSMD12|PSMD11|PSMD14|PSMD13|CUL1|HMGB1|RELA|PSMA7|PSMB10|MAP2K1|PSMA8|SQSTM1|PSMB6|PSMB7|PSMB4|PS…
CARGO CONCENTRATION IN THE ER%REACTOME%R-HSA-5694530.1	27	-0.5957646	-1.9749979	5.186722E-4	0.0077152033	0.1853																						3	ABC transporter disorders	77	-1.7045	0.0441	0.0022	CFTR|PSMC5|PSMC6|PSMC3|PSMC4|PSMC1|VCP|PSMC2|ABCB6|ABCB4|SEL1L|PSMD8|PSMD9|PSMD6|PSMD7|PSMD4|PSMD5|PSMD2|PSMD3|PSMD1|ABCA1|ABCA3|PSMA5|ERLIN1|PSMA6|PSMA3|ERLIN2|PSMA4|PSMA1|PSMA2|PSME3|PSME4|RNF185|PSME1|PSME2|ABCD4|UBA52|PSMD10|PSMB11|PSMD12|PSMD11|PSMD14|PSMD13|ABCD1|PSMA7|PSMB10|PSMA8|ABCC2|PSMB6|PSMB7|PSMB4|ABCC8|PSMB5|UBB|PSMB2|ABCC6|PSMB3|APOA1|UBC|ABCC9|PSMB1|PSMF1|RPS27A|SHFM1|PSMB8|PSMB9…
TRAFFICKING AND PROCESSING OF ENDOSOMAL TLR%REACTOME%R-HSA-1679131.1	10	-0.7798127	-1.9682618	2.3551578E-4	0.008247938	0.2																						1	Toll Like Receptor 4 (TLR4) Cascade	123	-2.0574	0.0041	0	NFKBIA|JUN|NFKBIB|IKBKB|UBE2N|TLR1|BPI|APP|SOCS1|TRAF6|IKBKG|BTRC|TLR2|MAP3K7|SKP1|UBE2V1|CHUK|MAPK8|FBXW11|RPS6KA3|MAP2K6|PLCG2|RPS6KA5|RPS6KA2|RPS6KA1|RIPK3|UBA52|NFKB2|NKIRAS1|NKIRAS2|TICAM2|FOS|LY96|CUL1|TICAM1|HMGB1|CASP8|RELA|FADD|MAP2K1|CD14|TLR4|IRAK1|UBB|DNM2|UBC|CD180|LY86|RPS27A|NFKB1|PPP2CA|PPP2CB|PPP2R1B|PPP2R1A|ITGAM|ITGB2|ELK1|CREB1|TBK1|IRF3|TRAF3|MAPK14|IRF7|MAPK11|IKBKE|SAA1|DUS…
ACTIVATED NOTCH1 TRANSMITS SIGNAL TO THE NUCLEUS%REACTOME DATABASE ID RELEASE 73%2122948	24	-0.60623735	-1.960991	0.0010333247	0.008886587	0.2183																							Regulation of TLR by endogenous ligand	16	-2.1237	0.002	0	FGG|LY96|TLR1|HMGB1|S100A9|CD14|TLR4|S100A8|TLR2|TLR6|FGB|FGA|S100A1|APOB|LBP|CD36
SEMA4D INDUCED CELL MIGRATION AND GROWTH-CONE COLLAPSE%REACTOME%R-HSA-416572.2	16	-0.6746073	-1.9589906	7.438631E-4	0.008913959	0.223																						2	Formation of a pool of free 40S subunits	102	2.0227	0.0022	0.0001	RPL37A|RPL24|RPL27|RPL26|RPL29|RPL28|RPS4Y2|RPL10|RPL12|RPL11|RPL36A|RPS27L|RPS4Y1|RPS15A|RPS3|RPL14|RPL13|RPL15|RPL18|RPL17|RPL19|RPL39L|RPL41|RPL35A|RPL23A|RPL3L|RPS26|RPS25|RPS28|RPS27|UBA52|EIF1AX|EIF3M|EIF3K|EIF3L|EIF3I|EIF3J|EIF3G|EIF3H|EIF3E|EIF3F|EIF3C|EIF3D|EIF3A|EIF3B|RPS27A|RPS14|RPS9|RPS7|RPS6|RPS2|RPS29|RPL27A|RPS20|RPL22L1|FAU|RPS21|RPS24|RPL26L1|RPS23|RPL4|RPL5|RPL30|RPL3|RPL32|RPL…
RIP-MEDIATED NFKB ACTIVATION VIA ZBP1%REACTOME DATABASE ID RELEASE 73%1810476	17	-0.66041696	-1.9553442	0.0020120724	0.009110165	0.2312																							Advanced glycosylation endproduct receptor signaling	13	-2.0244	0.005	0.0005	S100A12|DDOST|S100B|LGALS3|HMGB1|APP|CAPZA1|SAA1|AGER|PRKCSH|CAPZA2|MAPK1|MAPK3
SIGNALING BY NOTCH3%REACTOME%R-HSA-9012852.2	35	-0.5503056	-1.952367	2.6759433E-4	0.009288798	0.2397																						15	G-protein activation	28	-1.8192	0.022	0.0022	GNB2|GNB1|POMC|GNB4|GNB3|GNB5|GNGT1|GNGT2|GNAI3|GNAI1|PDYN|GNAI2|GNAT2|GNAT3|GNG3|GNG2|GNG5|GNG4|GNAT1|GNG7|GNG8|OPRM1|GNAZ|GNG10|GNG12|GNG11|GNG13|GNAO1
ROLE OF LAT2 NTAL LAB ON CALCIUM MOBILIZATION%REACTOME DATABASE ID RELEASE 73%2730905	14	-0.69872844	-1.9458551	4.8111618E-4	0.0098397285	0.2557																							Scavenging of heme from plasma	22	-2.1992	0.0008	0	IGHA1|ALB|CD163|AMBP|APOL1|IGKV5-2|IGKV2-28|HP|IGKV1-12|HBB|JCHAIN|IGKV3D-20|LRP1|IGKV2D-28|IGKV4-1|HBA2|HBA1|IGKV2D-30|APOA1|HPR|HPX|IGKV3-11
RHO GTPASES ACTIVATE NADPH OXIDASES%REACTOME%R-HSA-5668599.6	21	-0.6196796	-1.9434428	7.594937E-4	0.009943532	0.2619																							Antimicrobial peptides	94	-2.0753	0.0034	0	DEFB106B|DEFB119|DEFB118|DCD|DEFB116|SLC11A1|DEFB115|RNASE6|DEFB114|DEFB113|DEFB112|RNASE3|DEFB110|DEFB106A|PRSS2|TLR1|BPI|PRTN3|DEFB4A|S100A9|DEFB4B|S100A8|TLR2|S100A7|LTF|DEFB103A|DEFB103B|REG3A|DEFB129|DEFB128|DEFB127|DEFB126|DEFB125|ITLN1|DEFB124|DEFB123|REG3G|DEFB121|DEFB107A|DEFB107B|EPPIN-WFDC6|ELANE|ART1|PDZD11|RNASE8|RNASE7|PI3|DEFA1B|CHGA|DEFB104B|DEFB104A|DEFA6|DEFA4|DEFA5|PLA2G2A|DEFB…
ROLE OF PHOSPHOLIPIDS IN PHAGOCYTOSIS%REACTOME DATABASE ID RELEASE 73%2029485	27	-0.58185506	-1.942631	5.239717E-4	0.009861662	0.2643																						2	Eukaryotic Translation Termination	94	1.8919	0.0088	0	RPL37A|RPL24|RPL27|RPL26|RPL29|RPL28|RPS4Y2|RPL10|RPL12|RPL11|RPL36A|RPS27L|RPS4Y1|RPS15A|RPS3|RPL14|RPL13|RPL15|RPL18|RPL17|RPL19|RPL39L|RPL41|RPL35A|RPL23A|RPL3L|RPS26|RPS25|RPS28|RPS27|GSPT2|GSPT1|UBA52|APEH|RPS27A|RPS29|RPL27A|RPS20|RPL22L1|FAU|RPS14|RPS21|TRMT112|RPS24|RPL26L1|RPS23|RPL4|RPL5|RPL30|RPS9|RPL3|RPS7|RPL32|RPL31|RPLP1|RPS6|RPL34|RPL10L|RPLP0|RPL8|RPL10A|RPL9|RPL6|N6AMT1|RPL7|RPS…
SEMA4D IN SEMAPHORIN SIGNALING%REACTOME DATABASE ID RELEASE 73%400685	19	-0.637425	-1.9388653	0.0012651822	0.010179162	0.276																						11	Sema4D in semaphorin signaling	24	-1.9389	0.0102	0.0013	ROCK1|LIMK2|MYL12B|ROCK2|LIMK1|RHOC|RRAS|MYL9|RHOB|MYL6|PLXNB1|MYH9|RND1|RAC1|RHOA|ERBB2|ARHGEF11|SEMA4D|MYH14|MYH11|ARHGEF12|MYH10|MET|ARHGAP35
CDC6 ASSOCIATION WITH THE ORC:ORIGIN COMPLEX%REACTOME%R-HSA-68689.2	10	-0.7686132	-1.9381282	9.400705E-4	0.0101422975	0.2797																						8	Formation of the ternary complex, and subsequently, the 43S complex	52	1.7329	0.0331	0.002	RPS4Y2|RPS27L|RPS4Y1|RPS15A|RPS3|EIF2S2|EIF2S1|RPS26|EIF2S3|RPS25|RPS28|RPS27|EIF1AX|EIF3M|EIF3K|EIF3L|EIF3I|EIF3J|EIF3G|EIF3H|EIF3E|EIF3F|EIF3C|EIF3D|EIF3A|EIF3B|RPS27A|RPS29|RPS20|FAU|RPS14|RPS21|RPS24|RPS23|RPS9|RPS7|RPS6|RPS15|RPS4X|RPS17|RPS16|RPS19|RPS18|RPS11|RPS10|RPS2|RPS13|RPS12|RPS8|RPS5|RPSA|RPS3A
TRAF6 MEDIATED NF-KB ACTIVATION%REACTOME DATABASE ID RELEASE 73%933542	23	-0.6057916	-1.9243594	0.0015463918	0.011689923	0.3198																							Chk1 Chk2(Cds1) mediated inactivation of Cyclin B:Cdk1 complex	13	-2.0674	0.0036	0	YWHAE|WEE1|CDK1|YWHAB|YWHAQ|YWHAG|CHEK1|YWHAH|CCNB1|SFN|CHEK2|YWHAZ|CDC25C
NOTCH3 ACTIVATION AND TRANSMISSION OF SIGNAL TO THE NUCLEUS%REACTOME DATABASE ID RELEASE 73%9013507	19	-0.6317994	-1.9159501	0.0017672305	0.012737384	0.3462																						12	NOTCH3 Activation and Transmission of Signal to the Nucleus	25	-1.916	0.0127	0.0018	RPS27A|NEURL1|TACC3|NOTCH3|YBX1|NEURL1B|JAG2|DLL4|JAG1|WWP2|DLL1|MIB1|ADAM10|PSENEN|PSEN2|EGF|PSEN1|EGFR|APH1A|APH1B|UBA52|NCSTN|MIB2|UBB|UBC
REGULATION OF IFNG SIGNALING%REACTOME%R-HSA-877312.2	11	-0.73862165	-1.9144306	0.00210035	0.012748577	0.3511																						1	MyD88:MAL(TIRAP) cascade initiated on plasma membrane	94	-2.0488	0.0042	0	DUSP4|NFKBIA|JUN|NFKBIB|IKBKB|TAB3|UBE2N|TAB2|TAB1|TLR1|APP|SOCS1|TRAF6|IKBKG|BTRC|TLR2|MAP3K7|SKP1|UBE2V1|CHUK|MAPK8|FBXW11|ECSIT|RPS6KA3|MAP2K6|RPS6KA5|RPS6KA2|MEF2A|MAPK9|RPS6KA1|IRAK2|S100A12|MAP2K7|UBA52|MAP3K1|S100B|NFKB2|MAPK10|NKIRAS1|TNIP2|NKIRAS2|ATF1|FOS|MAP3K8|LY96|MAP2K3|CUL1|MAP2K4|IRAK3|HMGB1|SIGIRR|RELA|MAPKAPK3|PELI1|PELI3|MAP2K1|PELI2|CD14|NOD1|TLR4|NOD2|AGER|IRAK1|UBB|UBC|RIPK2…
INITIATION OF NUCLEAR ENVELOPE (NE) REFORMATION%REACTOME DATABASE ID RELEASE 73%2995383	15	-0.6763742	-1.9097093	0.0022332505	0.013357503	0.3689																						2	Viral mRNA Translation	90	1.9195	0.0061	0	RPL37A|RPL24|RPL27|RPL26|RPL29|RPL28|RPS4Y2|RPL10|RPL12|RPL11|RPL36A|RPS27L|RPS4Y1|RPS15A|RPS3|RPL14|RPL13|RPL15|RPL18|RPL17|RPL19|RPL39L|RPL41|RPL35A|RPL23A|RPL3L|RPS26|RPS25|RPS28|RPS27|UBA52|RPS27A|RPS29|RPL27A|RPS20|RPL22L1|FAU|RPS14|RPS21|GRSF1|RPS24|DNAJC3|RPL26L1|RPS23|RPL4|RPL5|RPL30|RPS9|RPL3|RPS7|RPL32|RPL31|RPLP1|RPS6|RPL34|RPL10L|RPLP0|RPL8|RPL10A|RPL9|RPL6|RPL7|RPS15|RPS4X|RPL7A|RPS1…
SEALING OF THE NUCLEAR ENVELOPE (NE) BY ESCRT-III%REACTOME%R-HSA-9668328.1	20	-0.616739	-1.9065462	0.0017430279	0.013661401	0.3812																							FCGR activation	21	-2.2329	0.0005	0	IGHG2|YES1|SYK|FCGR3A|FCGR2A|LYN|IGKV5-2|FYN|IGKV2-28|IGKV1-12|IGKV3D-20|FGR|IGKV2D-28|CD3G|IGKV4-1|HCK|IGKV2D-30|IGHG4|IGKV3-11|FCGR1A|IGHG1
CELLULAR RESPONSE TO HYPOXIA%REACTOME DATABASE ID RELEASE 73%1234174	65	-0.47345784	-1.9058943	0.0	0.01352323	0.3828																							Infection with Mycobacterium tuberculosis	27	-2.0086	0.006	0	CTSG|RPS27A|NOS2|RAB5A|ENO1|MRC1|TLR2|KPNB1|LTF|RNF213|VPS33B|UBA52|SFPQ|CORO1A|B2M|GSK3A|DUSP16|TRIM27|RAB7A|HGS|ATP6V1H|PGK1|KPNA1|UBB|UBC|MAPK1|MAPK3
TOLL LIKE RECEPTOR 7 8 (TLR7 8) CASCADE%REACTOME%R-HSA-168181.2	86	-0.4437349	-1.8997254	0.0	0.014214005	0.4037																						2	Nonsense Mediated Decay (NMD) independent of the Exon Junction Complex (EJC)	96	1.8531	0.0148	0	RPL37A|RPL24|RPL27|RPL26|RPL29|NCBP1|RPL28|NCBP2|RPS4Y2|RPL10|RPL12|RPL11|RPL36A|RPS27L|RPS4Y1|RPS15A|RPS3|RPL14|RPL13|RPL15|RPL18|RPL17|RPL19|RPL39L|RPL41|RPL35A|RPL23A|RPL3L|RPS26|RPS25|RPS28|RPS27|GSPT2|GSPT1|UBA52|RPS27A|UPF1|RPS29|RPL27A|RPS20|RPL22L1|FAU|RPS14|RPS21|RPS24|RPL26L1|RPS23|RPL4|RPL5|RPL30|RPS9|RPL3|RPS7|RPL32|RPL31|RPLP1|RPS6|RPL34|RPL10L|RPLP0|RPL8|RPL10A|RPL9|RPL6|RPL7|RPS15|…
TRAF6 MEDIATED INDUCTION OF NFKB AND MAP KINASES UPON TLR7 8 OR 9 ACTIVATION%REACTOME%R-HSA-975138.2	85	-0.44687018	-1.8964989	0.0	0.014512784	0.4148																						3	Defective CFTR causes cystic fibrosis	61	-1.8815	0.0159	0.0003	CFTR|PSMC5|PSMC6|PSMC3|PSMC4|PSMC1|VCP|PSMC2|SEL1L|PSMD8|PSMD9|PSMD6|PSMD7|PSMD4|PSMD5|PSMD2|PSMD3|PSMD1|PSMA5|ERLIN1|PSMA6|PSMA3|ERLIN2|PSMA4|PSMA1|PSMA2|PSME3|PSME4|RNF185|PSME1|PSME2|UBA52|PSMD10|PSMB11|PSMD12|PSMD11|PSMD14|PSMD13|PSMA7|PSMB10|PSMA8|PSMB6|PSMB7|PSMB4|PSMB5|UBB|PSMB2|PSMB3|UBC|PSMB1|PSMF1|RPS27A|SHFM1|PSMB8|PSMB9|DERL3|DERL1|DERL2|RNF5|ERLEC1|OS9
MYD88 DEPENDENT CASCADE INITIATED ON ENDOSOME%REACTOME DATABASE ID RELEASE 73%975155	86	-0.4437349	-1.8960143	0.0	0.014361253	0.4163																							tRNA processing	102	2.1615	0.0002	0	RAN|POM121|NUP205|AAAS|NUP160|NUP85|TPR|NUP88|NUP155|NUP153|POP5|POP7|POP1|TSEN15|POP4|RTCB|ZBTB8OS|TSEN2|TSEN54|C14ORF166|TSEN34|DDX1|C2ORF49|XPOT|FAM98B|NUP62|NDC1|SEC13|NUP133|NUP50|NUP54|TRMT112|NUP43|RAE1|RANBP2|RPP30|RPP38|TYW5|TYW3|TRMT5|TYW1|RPP21|TRMT12|RPP25|NUP35|LCMT2|RPP40|NUPL2|NUP37|NUP107|NUP188|RPP14|NUP214|TP53RK|NUP210|EPRS|ALKBH8|THG1L|TRMT44|PUS3|METTL1|CDKAL1|PUS7|QTRTD1|FTS…
KERATAN SULFATE BIOSYNTHESIS%REACTOME DATABASE ID RELEASE 73%2022854	14	-0.6829218	-1.893253	0.0031048483	0.014609982	0.4269																						3	Hh mutants abrogate ligand secretion	59	-1.6555	0.0546	0.0044	SHH|DHH|PSMC5|PSMC6|PSMC3|PSMC4|PSMC1|VCP|PSMC2|SEL1L|PSMD8|PSMD9|PSMD6|PSMD7|PSMD4|PSMD5|PSMD2|PSMD3|PSMD1|PSMA5|PSMA6|PSMA3|PSMA4|PSMA1|PSMA2|PSME3|PSME4|PSME1|PSME2|UBA52|IHH|PSMD10|PSMB11|PSMD12|PSMD11|PSMD14|PSMD13|PSMA7|PSMB10|PSMA8|PSMB6|PSMB7|PSMB4|PSMB5|UBB|PSMB2|PSMB3|UBC|PSMB1|PSMF1|RPS27A|SHFM1|PSMB8|PSMB9|DERL2|ERLEC1|OS9|HHAT|SYVN1
TGF-BETA RECEPTOR SIGNALING IN EMT (EPITHELIAL TO MESENCHYMAL TRANSITION)%REACTOME%R-HSA-2173791.1	14	-0.67552865	-1.890204	0.0019516955	0.014886769	0.4385
AQUAPORIN-MEDIATED TRANSPORT%REACTOME DATABASE ID RELEASE 73%445717	27	-0.5663929	-1.8840305	7.8595756E-4	0.015712302	0.4614
DEFECTIVE CFTR CAUSES CYSTIC FIBROSIS%REACTOME%R-HSA-5678895.2	56	-0.47569963	-1.8814616	2.943774E-4	0.015882855	0.4706
INTERLEUKIN-1 SIGNALING%REACTOME DATABASE ID RELEASE 73%9020702	96	-0.431799	-1.8786557	0.0	0.016128113	0.4812
SIGNAL AMPLIFICATION%REACTOME DATABASE ID RELEASE 73%392518	22	-0.5928013	-1.8728222	0.0012738854	0.016928237	0.5016
O2 CO2 EXCHANGE IN ERYTHROCYTES%REACTOME DATABASE ID RELEASE 73%1480926	12	-0.7024072	-1.8664957	0.0021377672	0.017927254	0.5262
TOLL LIKE RECEPTOR 9 (TLR9) CASCADE%REACTOME%R-HSA-168138.1	90	-0.43223545	-1.8662566	0.0	0.017720908	0.5269
ENDOSOMAL SORTING COMPLEX REQUIRED FOR TRANSPORT (ESCRT)%REACTOME DATABASE ID RELEASE 73%917729	29	-0.54898775	-1.8618153	0.0013241526	0.018347435	0.5453
ERYTHROCYTES TAKE UP CARBON DIOXIDE AND RELEASE OXYGEN%REACTOME%R-HSA-1237044.2	12	-0.7024072	-1.8593496	0.002167108	0.018556243	0.5548
THROMBIN SIGNALLING THROUGH PROTEINASE ACTIVATED RECEPTORS (PARS)%REACTOME DATABASE ID RELEASE 73%456926	21	-0.5962092	-1.8588451	0.0027855153	0.018423064	0.5571
INHIBITION OF VOLTAGE GATED CA2+ CHANNELS VIA GBETA GAMMA SUBUNITS%REACTOME%R-HSA-997272.1	13	-0.67431253	-1.8565943	0.00458273	0.018625462	0.5652
RAB GERANYLGERANYLATION%REACTOME DATABASE ID RELEASE 73%8873719	48	-0.4871273	-1.8527534	8.6931325E-4	0.019152446	0.5811
INTERLEUKIN-15 SIGNALING%REACTOME%R-HSA-8983432.3	14	-0.6624596	-1.8504786	0.0036719707	0.019379532	0.5899
INWARDLY RECTIFYING K+ CHANNELS%REACTOME DATABASE ID RELEASE 73%1296065	13	-0.67431253	-1.8499347	0.0033906514	0.019273572	0.5926
GRB2:SOS PROVIDES LINKAGE TO MAPK SIGNALING FOR INTEGRINS%REACTOME%R-HSA-354194.1	10	-0.7351466	-1.8451871	0.003828667	0.020035477	0.6125
G PROTEIN GATED POTASSIUM CHANNELS%REACTOME%R-HSA-1296059.1	13	-0.67431253	-1.8443322	0.0045618247	0.019979887	0.6152
TRIF(TICAM1)-MEDIATED TLR4 SIGNALING%REACTOME DATABASE ID RELEASE 73%937061	92	-0.42595875	-1.8432124	3.4059945E-4	0.019932583	0.6194
TOLL LIKE RECEPTOR 5 (TLR5) CASCADE%REACTOME%R-HSA-168176.1	81	-0.43434194	-1.8398505	0.0	0.020446306	0.6324
MYD88-INDEPENDENT TLR4 CASCADE%REACTOME%R-HSA-166166.2	92	-0.42595875	-1.8395231	0.0	0.020279616	0.6331
MYD88 CASCADE INITIATED ON PLASMA MEMBRANE%REACTOME%R-HSA-975871.1	81	-0.43434194	-1.8389226	3.254149E-4	0.020151645	0.6348
GABA B RECEPTOR ACTIVATION%REACTOME DATABASE ID RELEASE 73%977444	20	-0.593653	-1.8387817	0.0045203418	0.019957222	0.6353
ACTIVATION OF G PROTEIN GATED POTASSIUM CHANNELS%REACTOME%R-HSA-1296041.1	13	-0.67431253	-1.8368819	0.003371869	0.020131964	0.6407
ACTIVATION OF GABAB RECEPTORS%REACTOME%R-HSA-991365.3	20	-0.593653	-1.8346486	0.00477267	0.020348785	0.6487
RHO GTPASES ACTIVATE PAKS%REACTOME%R-HSA-5627123.2	17	-0.6197816	-1.830964	0.0019502682	0.020941027	0.6631
TOLL LIKE RECEPTOR 10 (TLR10) CASCADE%REACTOME DATABASE ID RELEASE 73%168142	81	-0.43434194	-1.8292935	3.2499188E-4	0.02106249	0.6693
GABA RECEPTOR ACTIVATION%REACTOME%R-HSA-977443.4	23	-0.56897736	-1.8286812	0.0018191268	0.02096327	0.6716
OXYGEN-DEPENDENT PROLINE HYDROXYLATION OF HYPOXIA-INDUCIBLE FACTOR ALPHA%REACTOME%R-HSA-1234176.2	58	-0.45928022	-1.8276933	0.0	0.020980231	0.6749
CHAPERONIN-MEDIATED PROTEIN FOLDING%REACTOME DATABASE ID RELEASE 73%390466	70	-0.44008884	-1.8227781	6.1462814E-4	0.02181332	0.6915
GOLGI CISTERNAE PERICENTRIOLAR STACK REORGANIZATION%REACTOME%R-HSA-162658.1	11	-0.7018595	-1.8207974	0.005925575	0.022047257	0.6997
ASSEMBLY OF THE PRE-REPLICATIVE COMPLEX%REACTOME%R-HSA-68867.4	63	-0.45144898	-1.8200281	0.0	0.022001026	0.7024
G-PROTEIN ACTIVATION%REACTOME DATABASE ID RELEASE 73%202040	15	-0.64226884	-1.8191735	0.002186589	0.021977853	0.7065
INTERLEUKIN-6 SIGNALING%REACTOME%R-HSA-1059683.2	10	-0.7262902	-1.8166151	0.0056061666	0.022312986	0.7152
INTERLEUKIN-4 AND INTERLEUKIN-13 SIGNALING%REACTOME%R-HSA-6785807.5	71	-0.4372937	-1.8037459	6.1500614E-4	0.025159646	0.7639
INTERLEUKIN-1 FAMILY SIGNALING%REACTOME DATABASE ID RELEASE 73%446652	119	-0.3992758	-1.8005729	0.0	0.025611896	0.7729
IRON UPTAKE AND TRANSPORT%REACTOME DATABASE ID RELEASE 73%917937	45	-0.4765106	-1.7988373	8.7234663E-4	0.025855126	0.7797
VASOPRESSIN REGULATES RENAL WATER HOMEOSTASIS VIA AQUAPORINS%REACTOME%R-HSA-432040.2	25	-0.546494	-1.7954311	0.0028226841	0.026467135	0.7907
PCP CE PATHWAY%REACTOME DATABASE ID RELEASE 73%4086400	74	-0.42880368	-1.7887963	0.0	0.027928626	0.8103
REGULATION OF INSULIN SECRETION%REACTOME%R-HSA-422356.3	43	-0.47833326	-1.7848924	0.002012651	0.028693432	0.8237
NOTCH2 ACTIVATION AND TRANSMISSION OF SIGNAL TO THE NUCLEUS%REACTOME%R-HSA-2979096.1	16	-0.6177493	-1.7846009	0.008780488	0.028497895	0.8241
P130CAS LINKAGE TO MAPK SIGNALING FOR INTEGRINS%REACTOME%R-HSA-372708.1	10	-0.71740067	-1.784543	0.0067536095	0.02824322	0.8241
NEGATIVE REGULATION OF FGFR4 SIGNALING%REACTOME DATABASE ID RELEASE 73%5654733	14	-0.63769597	-1.7818758	0.0059980806	0.02870062	0.8308
NEGATIVE REGULATION OF FGFR2 SIGNALING%REACTOME%R-HSA-5654727.1	14	-0.63769597	-1.7800108	0.007033713	0.028924795	0.8359
IKK COMPLEX RECRUITMENT MEDIATED BY RIP1%REACTOME DATABASE ID RELEASE 73%937041	21	-0.5687576	-1.7726763	0.006758448	0.030644948	0.8573
GROWTH HORMONE RECEPTOR SIGNALING%REACTOME%R-HSA-982772.1	17	-0.59979993	-1.7720603	0.006116956	0.03054307	0.8587
NEGATIVE REGULATION OF FGFR1 SIGNALING%REACTOME%R-HSA-5654726.2	14	-0.63769597	-1.7718093	0.008077928	0.030346883	0.8596
SPRY REGULATION OF FGF SIGNALING%REACTOME DATABASE ID RELEASE 73%1295596	13	-0.6541042	-1.7706155	0.008093311	0.030406814	0.8615
ADP SIGNALLING THROUGH P2Y PURINOCEPTOR 1%REACTOME%R-HSA-418592.2	16	-0.6061219	-1.7662606	0.0070593962	0.03143051	0.8713
NEGATIVE REGULATION OF FGFR3 SIGNALING%REACTOME DATABASE ID RELEASE 73%5654732	14	-0.63769597	-1.7662244	0.01056169	0.031164778	0.8713
DDX58 IFIH1-MEDIATED INDUCTION OF INTERFERON-ALPHA BETA%REACTOME%R-HSA-168928.5	63	-0.43725118	-1.7651708	2.993116E-4	0.031224186	0.874
PROSTACYCLIN SIGNALLING THROUGH PROSTACYCLIN RECEPTOR%REACTOME%R-HSA-392851.2	12	-0.6655284	-1.7648711	0.0054945056	0.031053592	0.8746
HEDGEHOG LIGAND BIOGENESIS%REACTOME%R-HSA-5358346.1	55	-0.44569486	-1.7645055	0.0014475969	0.030894436	0.8758
EPHB-MEDIATED FORWARD SIGNALING%REACTOME%R-HSA-3928662.2	30	-0.51479703	-1.7619954	0.003197442	0.031338543	0.8811
HH MUTANTS THAT DON'T UNDERGO AUTOCATALYTIC PROCESSING ARE DEGRADED BY ERAD%REACTOME DATABASE ID RELEASE 73%5362768	52	-0.4535641	-1.7552334	5.858231E-4	0.033135947	0.8963
COMMON PATHWAY OF FIBRIN CLOT FORMATION%REACTOME%R-HSA-140875.4	10	-0.6948865	-1.7496836	0.00969955	0.034547437	0.9092
ADRENALINE,NORADRENALINE INHIBITS INSULIN SECRETION%REACTOME DATABASE ID RELEASE 73%400042	14	-0.62832433	-1.7445693	0.011302211	0.03586399	0.9189
TOLL LIKE RECEPTOR 3 (TLR3) CASCADE%REACTOME%R-HSA-168164.3	89	-0.40572214	-1.7422715	0.0013596193	0.036302537	0.9227
PROTEIN FOLDING%REACTOME%R-HSA-391251.1	76	-0.41661826	-1.7418969	9.290802E-4	0.03615629	0.9232
SIGNALING BY NOTCH2%REACTOME DATABASE ID RELEASE 73%1980145	25	-0.535631	-1.7404801	0.006837174	0.036304306	0.9252
E2F MEDIATED REGULATION OF DNA REPLICATION%REACTOME DATABASE ID RELEASE 73%113510	21	-0.5553363	-1.7398708	0.00954534	0.036189783	0.9264
ADP SIGNALLING THROUGH P2Y PURINOCEPTOR 12%REACTOME%R-HSA-392170.2	14	-0.62517464	-1.73758	0.011266226	0.03661107	0.9306
GLYCOSAMINOGLYCAN METABOLISM%REACTOME%R-HSA-1630316.2	70	-0.42170402	-1.7344168	9.481669E-4	0.0373384	0.9363
PROLONGED ERK ACTIVATION EVENTS%REACTOME%R-HSA-169893.1	12	-0.64960635	-1.7333713	0.012307692	0.03738634	0.9377
ROS AND RNS PRODUCTION IN PHAGOCYTES%REACTOME DATABASE ID RELEASE 73%1222556	26	-0.5215632	-1.7289724	0.0064968816	0.03851239	0.9443
COPII-MEDIATED VESICLE TRANSPORT%REACTOME%R-HSA-204005.4	62	-0.42641708	-1.718258	9.11577E-4	0.041949414	0.9564
RHO GTPASES ACTIVATE WASPS AND WAVES%REACTOME%R-HSA-5663213.1	32	-0.49642125	-1.7177237	0.007951233	0.041831076	0.9576
CONDENSATION OF PROMETAPHASE CHROMOSOMES%REACTOME%R-HSA-2514853.2	10	-0.68060726	-1.7165513	0.012067765	0.041938648	0.9596
ANTIGEN PRESENTATION: FOLDING, ASSEMBLY AND PEPTIDE LOADING OF CLASS I MHC%REACTOME DATABASE ID RELEASE 73%983170	24	-0.53290516	-1.715177	0.007227672	0.042112336	0.961
TBC RABGAPS%REACTOME DATABASE ID RELEASE 73%8854214	41	-0.46893984	-1.713452	0.0025395034	0.042413097	0.9628
RESPONSE OF MTB TO PHAGOCYTOSIS%REACTOME%R-HSA-9637690.1	22	-0.54150456	-1.7118924	0.010165184	0.04265463	0.9646
INFLAMMASOMES%REACTOME%R-HSA-622312.1	20	-0.5519613	-1.7095038	0.010673444	0.043191236	0.9672
FORMATION OF FIBRIN CLOT (CLOTTING CASCADE)%REACTOME%R-HSA-140877.2	18	-0.57085633	-1.7077775	0.008464028	0.043531053	0.9683
NF-KB ACTIVATION THROUGH FADD RIP-1 PATHWAY MEDIATED BY CASPASE-8 AND -10%REACTOME%R-HSA-933543.3	12	-0.6427661	-1.7063434	0.011148008	0.043738786	0.97
ABC TRANSPORTER DISORDERS%REACTOME%R-HSA-5619084.4	64	-0.42053208	-1.7044986	0.0021511985	0.04408681	0.9717
EPH-EPHRIN MEDIATED REPULSION OF CELLS%REACTOME DATABASE ID RELEASE 73%3928665	30	-0.49755645	-1.7041214	0.004011768	0.0439378	0.9719
PLATELET HOMEOSTASIS%REACTOME%R-HSA-418346.2	54	-0.43481934	-1.7018281	0.0032534753	0.04442142	0.9741
DISEASES OF PROGRAMMED CELL DEATH%REACTOME%R-HSA-9645723.2	21	-0.5450576	-1.701694	0.010874938	0.044147655	0.9742
RHO GTPASES ACTIVATE CIT%REACTOME%R-HSA-5625900.2	17	-0.5760663	-1.700462	0.013258542	0.044232354	0.9756
BETA-CATENIN INDEPENDENT WNT SIGNALING%REACTOME DATABASE ID RELEASE 73%3858494	111	-0.3808517	-1.700343	3.5137034E-4	0.043966312	0.9758
GLUCAGON-LIKE PEPTIDE-1 (GLP1) REGULATES INSULIN SECRETION%REACTOME%R-HSA-381676.2	23	-0.5307738	-1.6985798	0.0099346405	0.044287905	0.9766
NEURODEGENERATIVE DISEASES%REACTOME%R-HSA-8863678.1	20	-0.55120736	-1.6981173	0.010473816	0.044161715	0.9773
INTERLEUKIN-6 FAMILY SIGNALING%REACTOME DATABASE ID RELEASE 73%6783589	13	-0.6240283	-1.6962209	0.019034022	0.044562377	0.9782
ECM PROTEOGLYCANS%REACTOME%R-HSA-3000178.3	23	-0.5326158	-1.6951941	0.012352033	0.044646118	0.9793
ER QUALITY CONTROL COMPARTMENT (ERQC)%REACTOME%R-HSA-901032.5	20	-0.55262315	-1.6945096	0.009254627	0.044601817	0.9794
REGULATED PROTEOLYSIS OF P75NTR%REACTOME%R-HSA-193692.1	10	-0.6745162	-1.6891551	0.01650779	0.04631124	0.9829
THROMBOXANE SIGNALLING THROUGH TP RECEPTOR%REACTOME%R-HSA-428930.2	15	-0.59439355	-1.6870322	0.017839687	0.04673054	0.9841
DEREGULATED CDK5 TRIGGERS MULTIPLE NEURODEGENERATIVE PATHWAYS IN ALZHEIMER'S DISEASE MODELS%REACTOME DATABASE ID RELEASE 73%8862803	20	-0.55120736	-1.6869017	0.011337869	0.0464887	0.9841
G1 S-SPECIFIC TRANSCRIPTION%REACTOME DATABASE ID RELEASE 73%69205	22	-0.5323359	-1.6813787	0.011178861	0.048297495	0.9864
INSULIN RECEPTOR RECYCLING%REACTOME%R-HSA-77387.3	19	-0.55255866	-1.6812835	0.013346515	0.048017554	0.9865
C-TYPE LECTIN RECEPTORS (CLRS)%REACTOME%R-HSA-5621481.1	114	-0.37435162	-1.68097	0.0	0.047832534	0.9866
SEMAPHORIN INTERACTIONS%REACTOME DATABASE ID RELEASE 73%373755	48	-0.4403504	-1.6795043	0.0034792693	0.04806923	0.9872
PRESYNAPTIC FUNCTION OF KAINATE RECEPTORS%REACTOME%R-HSA-500657.1	13	-0.61425173	-1.678592	0.020257387	0.04810844	0.9873
G BETA:GAMMA SIGNALLING THROUGH BTK%REACTOME%R-HSA-8964315.1	11	-0.64793706	-1.6759775	0.015714286	0.048889656	0.9883
INTERLEUKIN-20 FAMILY SIGNALING%REACTOME%R-HSA-8854691.6	13	-0.61415315	-1.675607	0.015068166	0.04872662	0.9885
ANTIGEN ACTIVATES B CELL RECEPTOR (BCR) LEADING TO GENERATION OF SECOND MESSENGERS%REACTOME%R-HSA-983695.3	32	-0.4807259	-1.6742347	0.0076440074	0.048958644	0.9894
G BETA:GAMMA SIGNALLING THROUGH PLC BETA%REACTOME%R-HSA-418217.3	13	-0.61425173	-1.6728406	0.02115019	0.049258515	0.9897
PEPTIDE LIGAND-BINDING RECEPTORS%REACTOME DATABASE ID RELEASE 73%375276	53	-0.42773458	-1.6679021	0.0026056746	0.050833337	0.9916
KERATAN SULFATE KERATIN METABOLISM%REACTOME%R-HSA-1638074.1	19	-0.5444453	-1.6648806	0.020352446	0.051742982	0.9919
POST-CHAPERONIN TUBULIN FOLDING PATHWAY%REACTOME%R-HSA-389977.2	14	-0.59670645	-1.6605417	0.016180437	0.05323132	0.9934
CDT1 ASSOCIATION WITH THE CDC6:ORC:ORIGIN COMPLEX%REACTOME DATABASE ID RELEASE 73%68827	54	-0.4253031	-1.655914	0.0037659327	0.05478004	0.9948
HH MUTANTS ABROGATE LIGAND SECRETION%REACTOME DATABASE ID RELEASE 73%5387390	53	-0.4271393	-1.6555331	0.004387248	0.054600015	0.9948
SARS-COV INFECTIONS%REACTOME DATABASE ID RELEASE 73%9679506	80	-0.3918632	-1.6537501	3.227889E-4	0.055042457	0.9949
EXTRA-NUCLEAR ESTROGEN SIGNALING%REACTOME DATABASE ID RELEASE 73%9009391	50	-0.42801374	-1.649607	0.0031736873	0.056500506	0.9955
CALNEXIN CALRETICULIN CYCLE%REACTOME DATABASE ID RELEASE 73%901042	25	-0.5081233	-1.6484724	0.015807204	0.05668803	0.9957
FCERI MEDIATED CA+2 MOBILIZATION%REACTOME DATABASE ID RELEASE 73%2871809	28	-0.48953423	-1.6472776	0.01039501	0.056910194	0.9963
G BETA:GAMMA SIGNALLING THROUGH CDC42%REACTOME%R-HSA-8964616.1	13	-0.60100263	-1.644208	0.02235723	0.057943195	0.9966
INLB-MEDIATED ENTRY OF LISTERIA MONOCYTOGENES INTO HOST CELL%REACTOME DATABASE ID RELEASE 73%8875360	11	-0.63568103	-1.6424502	0.024958795	0.058378357	0.9967
RHO GTPASE EFFECTORS%REACTOME%R-HSA-195258.3	198	-0.3378288	-1.6353528	0.0	0.061280478	0.9978
NRIF SIGNALS CELL DEATH FROM THE NUCLEUS%REACTOME DATABASE ID RELEASE 73%205043	14	-0.5886377	-1.635198	0.024216523	0.06100293	0.9978
DECTIN-2 FAMILY%REACTOME DATABASE ID RELEASE 73%5621480	11	-0.62692404	-1.6336858	0.022559961	0.06139147	0.998
COLLAGEN DEGRADATION%REACTOME%R-HSA-1442490.3	16	-0.5639351	-1.6336035	0.023610428	0.061080292	0.998
G0 AND EARLY G1%REACTOME%R-HSA-1538133.3	24	-0.5074771	-1.6323687	0.014762026	0.061283268	0.9984
SIGNALING BY NOTCH4%REACTOME DATABASE ID RELEASE 73%9013694	73	-0.39457303	-1.6313754	0.0035279025	0.061387904	0.9984
MYOGENESIS%REACTOME%R-HSA-525793.2	17	-0.554003	-1.6307807	0.02424394	0.061309777	0.9984
SIGNALING BY TGF-BETA RECEPTOR COMPLEX%REACTOME%R-HSA-170834.1	66	-0.39998528	-1.6263587	0.004016064	0.06309195	0.9988
VLDLR INTERNALISATION AND DEGRADATION%REACTOME%R-HSA-8866427.3	11	-0.6335251	-1.6247277	0.027071178	0.06351568	0.9988
SARS-COV-1 INFECTION%REACTOME DATABASE ID RELEASE 73%9678108	47	-0.42770484	-1.6244625	0.008600918	0.06332168	0.9988
CONSTITUTIVE SIGNALING BY NOTCH1 HD DOMAIN MUTANTS%REACTOME%R-HSA-2691232.1	11	-0.624617	-1.6216862	0.027666114	0.064258926	0.9992
SIGNALING BY NOTCH1 HD DOMAIN MUTANTS IN CANCER%REACTOME DATABASE ID RELEASE 73%2691230	11	-0.624617	-1.6197977	0.025592862	0.06479726	0.9993
SIGNALING BY HIGH-KINASE ACTIVITY BRAF MUTANTS%REACTOME%R-HSA-6802948.1	27	-0.48230344	-1.6184255	0.015210106	0.06513682	0.9994
CLEC7A (DECTIN-1) SIGNALING%REACTOME%R-HSA-5607764.1	93	-0.37434304	-1.6182531	6.6666666E-4	0.064881764	0.9994
CROSS-PRESENTATION OF SOLUBLE EXOGENOUS ANTIGENS (ENDOSOMES)%REACTOME%R-HSA-1236978.1	46	-0.42744362	-1.6154683	0.005888951	0.0658937	0.9994
SIGNALLING TO ERKS%REACTOME%R-HSA-187687.1	25	-0.4891951	-1.6134334	0.020149833	0.0665015	0.9994
REGULATION OF ORNITHINE DECARBOXYLASE (ODC)%REACTOME DATABASE ID RELEASE 73%350562	46	-0.42362866	-1.6111732	0.0063254745	0.067294605	0.9995
INTEGRIN SIGNALING%REACTOME%R-HSA-354192.2	19	-0.52677655	-1.6073565	0.026440509	0.068790704	0.9996
AUTOPHAGY%REACTOME%R-HSA-9612973.1	114	-0.36062357	-1.6071914	0.0014414415	0.06852302	0.9996
MAP2K AND MAPK ACTIVATION%REACTOME DATABASE ID RELEASE 73%5674135	30	-0.473428	-1.6063681	0.014423077	0.068575606	0.9996
BUDDING AND MATURATION OF HIV VIRION%REACTOME DATABASE ID RELEASE 73%162588	26	-0.48616806	-1.6061276	0.013989638	0.06834636	0.9996
DEPOLYMERISATION OF THE NUCLEAR LAMINA%REACTOME%R-HSA-4419969.1	12	-0.60150063	-1.6050022	0.028652616	0.06855273	0.9997
RAB REGULATION OF TRAFFICKING%REACTOME%R-HSA-9007101.3	110	-0.36184138	-1.6024641	7.2516315E-4	0.06947347	0.9997
FRS2-MEDIATED ACTIVATION%REACTOME DATABASE ID RELEASE 73%170968	10	-0.636101	-1.6013697	0.034772463	0.06966853	0.9997
PROGRAMMED CELL DEATH%REACTOME%R-HSA-5357801.2	152	-0.34127074	-1.6013422	3.9793077E-4	0.06933442	0.9997
SIGNALING BY RAF1 MUTANTS%REACTOME%R-HSA-9656223.1	29	-0.47640565	-1.6010514	0.018322581	0.06912599	0.9997
EPHA-MEDIATED GROWTH CONE COLLAPSE%REACTOME DATABASE ID RELEASE 73%3928663	11	-0.6162027	-1.5992676	0.03214535	0.0696717	0.9997
TRANSFERRIN ENDOCYTOSIS AND RECYCLING%REACTOME DATABASE ID RELEASE 73%917977	22	-0.5091111	-1.5991026	0.020520521	0.06940935	0.9997
P53-INDEPENDENT DNA DAMAGE RESPONSE%REACTOME DATABASE ID RELEASE 73%69610	48	-0.4184505	-1.5990325	0.008951776	0.069102466	0.9997
DEGRADATION OF THE EXTRACELLULAR MATRIX%REACTOME%R-HSA-1474228.4	48	-0.42282072	-1.5968814	0.007787713	0.069786645	0.9997
TGF-BETA RECEPTOR SIGNALING ACTIVATES SMADS%REACTOME DATABASE ID RELEASE 73%2173789	30	-0.46644935	-1.596301	0.011777302	0.06973952	0.9997
UBIQUITIN MEDIATED DEGRADATION OF PHOSPHORYLATED CDC25A%REACTOME%R-HSA-69601.3	48	-0.4184505	-1.5962582	0.009596387	0.06942722	0.9997
PLATELET SENSITIZATION BY LDL%REACTOME%R-HSA-432142.2	15	-0.55832994	-1.5959752	0.030093735	0.06922083	0.9997
SIGNALING BY NOTCH1%REACTOME DATABASE ID RELEASE 73%1980143	59	-0.40001467	-1.5953764	0.006969697	0.06918307	0.9998
ENERGY DEPENDENT REGULATION OF MTOR BY LKB1-AMPK%REACTOME%R-HSA-380972.1	27	-0.47771263	-1.5950669	0.014080835	0.069000676	0.9998
FCERI MEDIATED NF-KB ACTIVATION%REACTOME%R-HSA-2871837.2	79	-0.3788607	-1.5941374	0.0026058631	0.069130026	0.9998
APOPTOSIS%REACTOME%R-HSA-109581.3	149	-0.34184477	-1.5941317	7.898894E-4	0.06880339	0.9998
P53-INDEPENDENT G1 S DNA DAMAGE CHECKPOINT%REACTOME%R-HSA-69613.2	48	-0.4184505	-1.5923619	0.009795448	0.0693435	0.9998
MAPK TARGETS NUCLEAR EVENTS MEDIATED BY MAP KINASES%REACTOME%R-HSA-450282.1	29	-0.46765137	-1.5919318	0.017956166	0.06922981	0.9998
ONCOGENE INDUCED SENESCENCE%REACTOME DATABASE ID RELEASE 73%2559585	31	-0.46095413	-1.5899862	0.012401056	0.069889456	0.9998
ACTIVATION OF MATRIX METALLOPROTEINASES%REACTOME DATABASE ID RELEASE 73%1592389	11	-0.61247903	-1.5880156	0.036949314	0.070599586	0.9998
INTERLEUKIN-3, INTERLEUKIN-5 AND GM-CSF SIGNALING%REACTOME DATABASE ID RELEASE 73%512988	38	-0.43812776	-1.5853748	0.010158014	0.07156336	0.9999
EGFR DOWNREGULATION%REACTOME%R-HSA-182971.6	20	-0.51222	-1.5826076	0.02862883	0.07264744	0.9999
SIGNALING BY NOTCH%REACTOME%R-HSA-157118.5	149	-0.33964032	-1.5789713	3.8895372E-4	0.0741588	1.0
NUCLEOTIDE-BINDING DOMAIN, LEUCINE RICH REPEAT CONTAINING RECEPTOR (NLR) SIGNALING PATHWAYS%REACTOME%R-HSA-168643.1	50	-0.4114257	-1.5782222	0.009795448	0.07421615	1.0
G ALPHA (12 13) SIGNALLING EVENTS%REACTOME%R-HSA-416482.4	53	-0.40417007	-1.578124	0.0061637806	0.073925644	1.0
SIGNALING BY INSULIN RECEPTOR%REACTOME%R-HSA-74752.1	44	-0.421563	-1.5748135	0.010050251	0.074987434	1.0
RECYCLING PATHWAY OF L1%REACTOME%R-HSA-437239.1	22	-0.4981448	-1.5739406	0.02608916	0.07476265	1.0

## Sheet: 4 Reac NRT1T0
Reactome pathways upregulated in non-responders at follow-up vs baseline	SIZE	ES	NES	NOM p-val	FDR q-val	FWER p-val																				__mclCluster	EnrichmentMap::GS_DESCR	EnrichmentMap::gs_size	EnrichmentMap::NES (210701_GSEA210701_Reactom_NRT1T0_FDR0075)	EnrichmentMap::fdr_qvalue (210701_GSEA210701_Reactom_NRT1T0_FDR0075)	EnrichmentMap::pvalue (210701_GSEA210701_Reactom_NRT1T0_FDR0075)	EnrichmentMap::Genes
PROTEIN-PROTEIN INTERACTIONS AT SYNAPSES%REACTOME%R-HSA-6794362.4	34	0.6540861	2.0144258	0.0	0.023794092	0.0279																	Cluster information				Protein-protein interactions at synapses	86	2.0144	0.0238	0	SHARPIN|GRIN2B|GRIA1|DLG1|DLG3|DLG4|GRM1|GRM5|SIPA1L1|LRRTM3|LRRTM4|LRRTM1|PTPRD|LRRTM2|LRFN2|DLGAP1|LRFN4|HOMER3|LRFN1|DLGAP3|FLOT1|DLGAP2|FLOT2|DLGAP4|GRIA3|PPFIBP1|DBNL|GRIA4|RTN3|CASK|PPFIBP2|PTPRS|SHANK2|PTPRF|SHANK1|LRFN3|NLGN3|NLGN1|NLGN2|EPB41|NRXN1|NRXN3|NRXN2|LIN7A|LIN7C|LIN7B|BEGAIN|EPB41L5|LRRC4B|GRIN1|EPB41L1|EPB41L2|EPB41L3|PDLIM5|NLGN4Y|NLGN4X|IL1RAPL2|SYT2|STXBP1|SYT1|HOMER1|HOMER…
																							associated with the figure			29	Viral mRNA Translation	90	-1.5596	0.0744	0.0044	RPL37A|RPL24|RPL27|RPL26|RPL29|RPL28|RPS4Y2|RPL10|RPL12|RPL11|RPL36A|RPS27L|RPS4Y1|RPS15A|RPS3|RPL14|RPL13|RPL15|RPL18|RPL17|RPL19|RPL39L|RPL41|RPL35A|RPL23A|RPL3L|RPS26|RPS25|RPS28|RPS27|UBA52|RPS27A|RPS29|RPL27A|RPS20|RPL22L1|FAU|RPS14|RPS21|GRSF1|RPS24|DNAJC3|RPL26L1|RPS23|RPL4|RPL5|RPL30|RPS9|RPL3|RPS7|RPL32|RPL31|RPLP1|RPS6|RPL34|RPL10L|RPLP0|RPL8|RPL10A|RPL9|RPL6|RPL7|RPS15|RPS4X|RPL7A|RPS1…
Reactome pathways downregulated in non-responders at follow-up vs baseline	SIZE	ES	NES	NOM p-val	FDR q-val	FWER p-val																				28	Transcriptional regulation by RUNX2	118	-1.5603	0.0744	0.0045	RUNX1|YES1|PSMC5|PSMC6|PSMC3|PSMC4|COL1A1|ITGBL1|PSMC1|PSMC2|PSMD8|PSMD9|PSMD6|UCMA|PSMD7|PSMD4|YAP1|PSMD5|SATB2|PSMD2|PSMD3|PSMD1|SKP1|HEY1|PSMA5|PSMA6|HEY2|PSMA3|PSMA4|PSMA1|PSMA2|PSME3|PSME4|PSME1|PSME2|UBA52|IHH|PSMD10|PSMB11|NR3C1|PSMD12|PSMD11|PSMD14|PSMD13|CUL1|MSX2|CDK1|PSMA7|PSMB10|GLI3|PSMA8|GLI2|PSMB6|PSMB7|PSMB4|CCNB1|PSMB5|UBB|PSMB2|PSMB3|UBC|RB1|PSMB1|PSMF1|CDKN1A|BGLAP|RPS27A|ZNF52…
INTERFERON ALPHA BETA SIGNALING%REACTOME%R-HSA-909733.2	49	-0.71711	-2.4150074	0.0	0.0	0.0																				33	DNA Double-Strand Break Repair	166	-1.5753	0.0676	0.0015	PCNA|POLD3|POLD4|BRCA1|PARP2|UBE2I|SUMO1|UBE2N|LIG3|UBE2V2|SUMO2|MAPK8|XRCC1|MRE11A|ERCC4|ERCC1|PAXIP1|SIRT6|RAD1|BRCA2|DCLRE1C|RAD51AP1|RIF1|XRCC2|POLL|XRCC3|RMI2|NHEJ1|PALB2|POLM|UBA52|RAD51B|TDP2|RAD51C|TDP1|BABAM1|CLSPN|RMI1|UIMC1|WHSC1|RNF168|RNF8|BRCC3|APBB1|TP53BP1|KDM4A|KDM4B|POLQ|RNF4|EYA1|RAD9B|EYA2|EYA3|EYA4|CHEK2|PPP5C|BRE|UBB|HIST3H3|RAD9A|FAM175A|ATM|BAP1|UBC|WRN|RPS27A|MUS81|SLX4|E…
G1 S TRANSITION%REACTOME DATABASE ID RELEASE 73%69206	117	-0.6041777	-2.351035	0.0	6.003617E-5	1.0E-4																				29	SRP-dependent cotranslational protein targeting to membrane	113	-1.5777	0.0665	0.0023	RPL37A|RPL24|RPL27|RPL26|RPL29|RPL28|RPS4Y2|RPL10|RPL12|RPL11|RPL36A|RPS27L|RPS4Y1|RPS15A|RPS3|RPL14|RPL13|RPL15|RPL18|RPL17|RPL19|RPL39L|RPL41|RPL35A|RPL23A|RPL3L|RPS26|RPS25|RPS28|RPS27|UBA52|DDOST|RPS27A|SPCS3|SPCS2|SPCS1|SEC11A|SEC11C|RPS14|RPS9|RPS7|RPS6|RPS2|SSR1|TRAM1|SRPR|SRP54|SSR4|SSR2|SSR3|SRP9|SRP72|SRP68|SRP19|SRP14|SEC61A2|SRPRB|SEC61A1|SEC61G|RPS29|SEC61B|RPL27A|RPS20|RPL22L1|FAU|R…
SYNTHESIS OF DNA%REACTOME%R-HSA-69239.2	112	-0.6043845	-2.348744	0.0	4.0024115E-5	1.0E-4																				28	TNFR2 non-canonical NF-kB pathway	100	-1.5837	0.0636	0.0045	PSMC5|PSMC6|PSMC3|PSMC4|PSMC1|PSMC2|LTBR|PSMD8|PSMD9|PSMD6|PSMD7|MAP3K14|PSMD4|PSMD5|PSMD2|PSMD3|PSMD1|BTRC|SKP1|CHUK|FBXW11|PSMA5|PSMA6|PSMA3|PSMA4|PSMA1|PSMA2|PSME3|PSME4|PSME1|PSME2|UBA52|NFKB2|PSMD10|PSMB11|PSMD12|PSMD11|PSMD14|PSMD13|FASLG|CUL1|PSMA7|CD40LG|PSMB10|PSMA8|PSMB6|PSMB7|PSMB4|PSMB5|UBB|PSMB2|PSMB3|UBC|PSMB1|LTB|PSMF1|RPS27A|SHFM1|PSMB8|PSMB9|TNFRSF11A|TNFSF13|TRAF3|TNFRSF13C|TNF|…
S PHASE%REACTOME%R-HSA-69242.2	147	-0.5803904	-2.346073	0.0	3.0018085E-5	1.0E-4																				33	HDR through Homologous Recombination (HRR) or Single Strand Annealing (SSA)	132	-1.6036	0.0579	0.0021	PCNA|POLD3|POLD4|BRCA1|UBE2I|SUMO1|UBE2N|UBE2V2|SUMO2|MRE11A|ERCC4|ERCC1|SIRT6|RAD1|BRCA2|RAD51AP1|XRCC2|XRCC3|RMI2|PALB2|UBA52|RAD51B|RAD51C|BABAM1|CLSPN|RMI1|UIMC1|WHSC1|RNF168|RNF8|BRCC3|TP53BP1|RNF4|RAD9B|BRE|UBB|HIST3H3|RAD9A|FAM175A|ATM|UBC|WRN|RPS27A|MUS81|SLX4|EME1|EME2|ABL1|SLX1B|SLX1A|CDK2|RBBP8|CCNA2|CCNA1|RAD50|RAD51|KAT5|BLM|GEN1|CHEK1|SPIDR|HUS1|DNA2|RHNO1|ATR|HIST3H2BB|BARD1|TOP3A|…
DNA REPLICATION%REACTOME DATABASE ID RELEASE 73%69306	119	-0.5831672	-2.285405	0.0	2.4014467E-5	1.0E-4																				29	Eukaryotic Translation Initiation	120	-1.6039	0.0581	0.0019	EIF4A2|RPL37A|EIF4A1|RPL24|RPL27|RPL26|RPL29|RPL28|RPS4Y2|RPL10|RPL12|RPL11|RPL36A|RPS27L|RPS4Y1|RPS15A|RPS3|RPL14|RPL13|RPL15|RPL18|RPL17|RPL19|RPL39L|RPL41|RPL35A|RPL23A|RPL3L|RPS26|RPS25|RPS28|RPS27|UBA52|EIF1AX|EIF3M|EIF3K|EIF3L|EIF3I|EIF3J|EIF3G|EIF3H|EIF3E|EIF3F|EIF3C|EIF3D|EIF3A|EIF3B|RPS27A|RPS14|RPS9|RPS7|RPS6|EIF4EBP1|EIF4E|EIF4B|EIF4G1|RPS2|PABPC1|EIF2S2|EIF2S1|EIF2S3|EIF5|EIF2B5|EIF2B…
G0 AND EARLY G1%REACTOME%R-HSA-1538133.3	24	-0.7865632	-2.275867	0.0	2.0012058E-5	1.0E-4																				29	Cap-dependent Translation Initiation	120	-1.6074	0.0568	0.0015	EIF4A2|RPL37A|EIF4A1|RPL24|RPL27|RPL26|RPL29|RPL28|RPS4Y2|RPL10|RPL12|RPL11|RPL36A|RPS27L|RPS4Y1|RPS15A|RPS3|RPL14|RPL13|RPL15|RPL18|RPL17|RPL19|RPL39L|RPL41|RPL35A|RPL23A|RPL3L|RPS26|RPS25|RPS28|RPS27|UBA52|EIF1AX|EIF3M|EIF3K|EIF3L|EIF3I|EIF3J|EIF3G|EIF3H|EIF3E|EIF3F|EIF3C|EIF3D|EIF3A|EIF3B|RPS27A|RPS14|RPS9|RPS7|RPS6|EIF4EBP1|EIF4E|EIF4B|EIF4G1|RPS2|PABPC1|EIF2S2|EIF2S1|EIF2S3|EIF5|EIF2B5|EIF2B…
MITOTIC G1 PHASE AND G1 S TRANSITION%REACTOME%R-HSA-453279.4	133	-0.5619154	-2.238085	0.0	3.3423716E-5	2.0E-4																				29	Peptide chain elongation	90	-1.6125	0.0553	0.0023	RPL37A|RPL24|RPL27|RPL26|RPL29|RPL28|RPS4Y2|RPL10|RPL12|RPL11|RPL36A|RPS27L|RPS4Y1|RPS15A|RPS3|RPL14|RPL13|RPL15|RPL18|RPL17|RPL19|RPL39L|RPL41|RPL35A|RPL23A|EEF2|RPL3L|RPS26|RPS25|RPS28|RPS27|EEF1A1|UBA52|RPS27A|RPS29|RPL27A|RPS20|RPL22L1|FAU|RPS14|RPS21|RPS24|RPL26L1|RPS23|RPL4|RPL5|RPL30|RPS9|RPL3|RPS7|RPL32|RPL31|RPLP1|RPS6|RPL34|RPL10L|RPLP0|RPL8|RPL10A|RPL9|RPL6|RPL7|RPS15|RPS4X|RPL7A|RPS17…
SWITCHING OF ORIGINS TO A POST-REPLICATIVE STATE%REACTOME DATABASE ID RELEASE 73%69052	84	-0.5981343	-2.2296064	0.0	4.396206E-5	3.0E-4																				33	Homology Directed Repair	138	-1.618	0.0539	0.0023	PCNA|POLD3|POLD4|BRCA1|PARP2|UBE2I|SUMO1|UBE2N|LIG3|UBE2V2|SUMO2|XRCC1|MRE11A|ERCC4|ERCC1|SIRT6|RAD1|BRCA2|RAD51AP1|XRCC2|XRCC3|RMI2|PALB2|UBA52|RAD51B|RAD51C|BABAM1|CLSPN|RMI1|UIMC1|WHSC1|RNF168|RNF8|BRCC3|TP53BP1|POLQ|RNF4|RAD9B|BRE|UBB|HIST3H3|RAD9A|FAM175A|ATM|UBC|WRN|RPS27A|MUS81|SLX4|EME1|EME2|ABL1|SLX1B|SLX1A|CDK2|RBBP8|CCNA2|CCNA1|RAD50|RAD51|KAT5|BLM|GEN1|CHEK1|SPIDR|HUS1|DNA2|RHNO1|ATR|…
ORC1 REMOVAL FROM CHROMATIN%REACTOME DATABASE ID RELEASE 73%68949	65	-0.62283206	-2.204776	0.0	9.037166E-5	7.0E-4																				29	Eukaryotic Translation Termination	94	-1.6374	0.047	0.0017	RPL37A|RPL24|RPL27|RPL26|RPL29|RPL28|RPS4Y2|RPL10|RPL12|RPL11|RPL36A|RPS27L|RPS4Y1|RPS15A|RPS3|RPL14|RPL13|RPL15|RPL18|RPL17|RPL19|RPL39L|RPL41|RPL35A|RPL23A|RPL3L|RPS26|RPS25|RPS28|RPS27|GSPT2|GSPT1|UBA52|APEH|RPS27A|RPS29|RPL27A|RPS20|RPL22L1|FAU|RPS14|RPS21|TRMT112|RPS24|RPL26L1|RPS23|RPL4|RPL5|RPL30|RPS9|RPL3|RPS7|RPL32|RPL31|RPLP1|RPS6|RPL34|RPL10L|RPLP0|RPL8|RPL10A|RPL9|RPL6|N6AMT1|RPL7|RPS…
CYCLIN E ASSOCIATED EVENTS DURING G1 S TRANSITION%REACTOME%R-HSA-69202.3	75	-0.6059319	-2.2018447	0.0	1.06123036E-4	9.0E-4																				29	Eukaryotic Translation Elongation	94	-1.6378	0.047	0.0025	RPL37A|RPL24|RPL27|RPL26|RPL29|RPL28|RPS4Y2|RPL10|RPL12|RPL11|RPL36A|RPS27L|RPS4Y1|RPS15A|RPS3|RPL14|RPL13|RPL15|RPL18|RPL17|RPL19|RPL39L|RPL41|RPL35A|RPL23A|EEF2|RPL3L|RPS26|RPS25|RPS28|RPS27|EEF1A1|UBA52|RPS27A|RPS29|RPL27A|RPS20|RPL22L1|FAU|RPS14|RPS21|RPS24|RPL26L1|RPS23|RPL4|RPL5|RPL30|RPS9|RPL3|RPS7|RPL32|RPL31|RPLP1|RPS6|RPL34|RPL10L|RPLP0|RPL8|RPL10A|RPL9|RPL6|RPL7|RPS15|EEF1B2|RPS4X|RPL7…
APC C-MEDIATED DEGRADATION OF CELL CYCLE PROTEINS%REACTOME%R-HSA-174143.1	80	-0.59548545	-2.200857	0.0	9.647549E-5	9.0E-4																				29	Regulation of expression of SLITs and ROBOs	171	-1.6421	0.0461	0	RPL37A|RPL24|RPL27|PSMC5|RPL26|PSMC6|RPL29|PSMC3|NCBP1|RPL28|PSMC4|NCBP2|RPS4Y2|PSMC1|RPL10|PSMC2|RPL12|RPL11|RPL36A|RPS27L|RPS4Y1|PSMD8|RPS15A|PSMD9|RPS3|PSMD6|RPL14|PSMD7|RPL13|PSMD4|RPL15|PSMD5|RPL18|PSMD2|RPL17|PSMD3|RPL19|PSMD1|RPL39L|RPL41|RPL35A|RPL23A|RPL3L|RPS26|RPS25|PSMA5|RPS28|PSMA6|RPS27|PSMA3|PSMA4|PSMA1|PSMA2|GSPT2|PSME3|PSME4|GSPT1|PSME1|DAG1|PSME2|UBA52|PSMD10|PSMB11|PSMD12|PSMD1…
INTERFERON SIGNALING%REACTOME%R-HSA-913531.2	161	-0.53958005	-2.197304	0.0	9.864497E-5	0.001																				37	rRNA processing	203	-1.6512	0.0441	0	UBA52|RCL1|TBL3|MPHOSPH10|RPS27A|NOL11|NOP10|DDX49|DDX47|WDR3|FCF1|NAT10|THUMPD1|PWP2|WDR46|CSNK1E|WDR43|RRP9|RPS14|TRMT112|FBL|UTP14A|UTP14C|UTP15|WDR36|RPS9|RPS7|IMP3|DIMT1|RPS6|WDR75|IMP4|DDX52|UTP11L|UTP18|DIEXF|CIRH1A|NHP2L1|DKC1|NHP2|EXOSC7|HEATR1|EXOSC6|NOP2|EXOSC5|TSR3|EXOSC4|NOC4L|EXOSC9|NOL6|EXOSC8|RRP7A|EXOSC3|EMG1|EXOSC2|PDCD11|EXOSC1|BMS1|GAR1|DHX37|WBSCR22|RRP36|UTP20|RPS2|NOP14|NOP…
ANTIVIRAL MECHANISM BY IFN-STIMULATED GENES%REACTOME DATABASE ID RELEASE 73%1169410	74	-0.60339856	-2.194989	0.0	9.1056885E-5	0.001																				29	Formation of a pool of free 40S subunits	102	-1.6597	0.0417	0.0017	RPL37A|RPL24|RPL27|RPL26|RPL29|RPL28|RPS4Y2|RPL10|RPL12|RPL11|RPL36A|RPS27L|RPS4Y1|RPS15A|RPS3|RPL14|RPL13|RPL15|RPL18|RPL17|RPL19|RPL39L|RPL41|RPL35A|RPL23A|RPL3L|RPS26|RPS25|RPS28|RPS27|UBA52|EIF1AX|EIF3M|EIF3K|EIF3L|EIF3I|EIF3J|EIF3G|EIF3H|EIF3E|EIF3F|EIF3C|EIF3D|EIF3A|EIF3B|RPS27A|RPS14|RPS9|RPS7|RPS6|RPS2|RPS29|RPL27A|RPS20|RPL22L1|FAU|RPS21|RPS24|RPL26L1|RPS23|RPL4|RPL5|RPL30|RPL3|RPL32|RPL…
REGULATION OF MITOTIC CELL CYCLE%REACTOME%R-HSA-453276.2	80	-0.59548545	-2.1920419	0.0	8.455283E-5	0.001																				34	Mitotic Anaphase	226	-1.6601	0.0419	0.0002	PSMC5|PSMC6|PSMC3|PSMC4|PSMC1|PSMC2|UBE2I|SUMO1|PSMD8|PSMD9|PSMD6|PSMD7|PSMD4|PSMD5|PSMD2|PSMD3|PSMD1|PSMA5|PSMA6|PSMA3|PSMA4|PSMA1|PSMA2|PSME3|PSME4|PSME1|PSME2|UBA52|TUBB8P12|PSMD10|TUBB8|PSMB11|SPAST|PSMD12|IST1|PSMD11|LEMD2|PSMD14|CC2D1B|PSMD13|CDK1|PSMA7|PSMB10|CHMP2B|PSMA8|CHMP2A|PSMB6|CHMP4C|PSMB7|CHMP3|PSMB4|CHMP4B|PSMB5|CHMP4A|UBB|PSMB2|CHMP6|PSMB3|CHMP7|UBC|PSMB1|PSMF1|RPS27A|SHFM1|LBR|…
CYCLIN A:CDK2-ASSOCIATED EVENTS AT S PHASE ENTRY%REACTOME DATABASE ID RELEASE 73%69656	77	-0.59887314	-2.1907263	0.0	7.891597E-5	0.001																				39	G2 M DNA damage checkpoint	95	-1.6614	0.0416	0.0039	RHNO1|ATR|BRCA1|HIST3H2BB|SUMO1|UBE2N|WEE1|BARD1|UBE2V2|TOP3A|HIST1H2BF|HIST1H2BE|HIST1H2BH|HIST1H2BG|HIST1H2BB|HIST1H2BA|HIST1H2BD|MRE11A|HIST1H2BC|RAD17|RPA3|RAD1|RPA1|RPA2|RMI2|YWHAE|BABAM1|RMI1|UIMC1|HIST1H4K|WHSC1|EXO1|RNF168|RNF8|HIST1H4L|BRCC3|CDK1|TP53BP1|H2BFS|HIST1H4A|TP53|HIST1H4B|RAD9B|HIST1H4H|HIST1H4I|HIST1H4J|CCNB1|CHEK2|BRE|HIST1H4C|HIST3H3|HIST1H4D|RAD9A|TOPBP1|FAM175A|HIST1H4E|A…
G1 S-SPECIFIC TRANSCRIPTION%REACTOME DATABASE ID RELEASE 73%69205	22	-0.7695586	-2.1770163	0.0	9.6223936E-5	0.0013																				30	Fc epsilon receptor (FCERI) signaling	135	-1.6654	0.0407	0.0009	NFKBIA|JUN|VAV1|PSMC5|VAV2|PSMC6|PSMC3|PSMC4|PSMC1|PSMC2|LYN|IKBKB|IGKV5-2|PSMD8|UBE2N|PSMD9|PSMD6|IGKV2-28|PSMD7|IGKV1-12|PSMD4|PDPK1|PSMD5|IGKV3D-20|PSMD2|CDC34|PSMD3|IGKV2D-28|PSMD1|TRAF6|IKBKG|IGKV4-1|BTRC|IGHE|MAP3K7|PRKCQ|SKP1|UBE2V1|CHUK|IGKV2D-30|MAPK8|FBXW11|RASGRP2|RASGRP1|PSMA5|RASGRP4|PSMA6|IGKV3-11|PSMA3|PSMA4|PSMA1|PLCG2|PSMA2|PSME3|PSME4|PSME1|PSME2|UBA52|CARD11|PSMD10|TXK|PPP3R1|P…
APC C:CDC20 MEDIATED DEGRADATION OF MITOTIC PROTEINS%REACTOME DATABASE ID RELEASE 73%176409	70	-0.6011605	-2.1658282	0.0	9.725185E-5	0.0014																				33	Processing of DNA double-strand break ends	98	-1.6657	0.0409	0.0032	BRCA1|UBE2I|SUMO1|UBE2N|UBE2V2|SUMO2|MRE11A|SIRT6|RAD1|RMI2|UBA52|BABAM1|CLSPN|RMI1|UIMC1|WHSC1|RNF168|RNF8|BRCC3|TP53BP1|RNF4|RAD9B|BRE|UBB|HIST3H3|RAD9A|FAM175A|ATM|UBC|WRN|RPS27A|CDK2|RBBP8|CCNA2|CCNA1|RAD50|KAT5|BLM|CHEK1|HUS1|DNA2|RHNO1|ATR|HIST3H2BB|BARD1|TOP3A|HIST1H2BF|HIST1H2BE|HIST1H2BH|HIST1H2BG|HIST1H2BB|HIST1H2BA|HIST1H2BD|HIST1H2BC|RAD17|RPA3|RPA1|RPA2|HIST1H4K|EXO1|HIST1H4L|H2BFS|H…
ACTIVATION OF APC C AND APC C:CDC20 MEDIATED DEGRADATION OF MITOTIC PROTEINS%REACTOME DATABASE ID RELEASE 73%176814	70	-0.6011605	-2.1656632	0.0	9.184896E-5	0.0014																				29	Nonsense Mediated Decay (NMD) independent of the Exon Junction Complex (EJC)	96	-1.6705	0.0405	0.0008	RPL37A|RPL24|RPL27|RPL26|RPL29|NCBP1|RPL28|NCBP2|RPS4Y2|RPL10|RPL12|RPL11|RPL36A|RPS27L|RPS4Y1|RPS15A|RPS3|RPL14|RPL13|RPL15|RPL18|RPL17|RPL19|RPL39L|RPL41|RPL35A|RPL23A|RPL3L|RPS26|RPS25|RPS28|RPS27|GSPT2|GSPT1|UBA52|RPS27A|UPF1|RPS29|RPL27A|RPS20|RPL22L1|FAU|RPS14|RPS21|RPS24|RPL26L1|RPS23|RPL4|RPL5|RPL30|RPS9|RPL3|RPS7|RPL32|RPL31|RPLP1|RPS6|RPL34|RPL10L|RPLP0|RPL8|RPL10A|RPL9|RPL6|RPL7|RPS15|…
G2 M CHECKPOINTS%REACTOME%R-HSA-69481.3	119	-0.54755235	-2.1467862	0.0	1.362574E-4	0.0022																				34	Mitotic Metaphase and Anaphase	227	-1.6819	0.0368	0	PSMC5|PSMC6|PSMC3|PSMC4|PSMC1|PSMC2|UBE2I|SUMO1|PSMD8|PSMD9|PSMD6|PSMD7|PSMD4|PSMD5|PSMD2|PSMD3|PSMD1|PSMA5|PSMA6|PSMA3|PSMA4|PSMA1|PSMA2|PSME3|PSME4|PSME1|PSME2|UBA52|TUBB8P12|PSMD10|TUBB8|PSMB11|SPAST|PSMD12|IST1|PSMD11|LEMD2|PSMD14|CC2D1B|PSMD13|CDK1|PSMA7|PSMB10|CHMP2B|PSMA8|CHMP2A|PSMB6|CHMP4C|PSMB7|CHMP3|PSMB4|CHMP4B|PSMB5|CHMP4A|UBB|PSMB2|CHMP6|PSMB3|CHMP7|UBC|PSMB1|PSMF1|RPS27A|SHFM1|LBR|…
CDC20:PHOSPHO-APC C MEDIATED DEGRADATION OF CYCLIN A%REACTOME DATABASE ID RELEASE 73%174184	68	-0.5970569	-2.146241	0.0	1.2944452E-4	0.0022																				28	Regulation of PTEN stability and activity	69	-1.6829	0.0367	0.0023	PSMC5|PSMC6|PSMC3|RNF146|PSMC4|PSMC1|PSMC2|TNKS|PSMD8|PSMD9|PSMD6|PSMD7|PSMD4|PREX2|PSMD5|WWP2|PSMD2|PSMD3|PSMD1|USP13|OTUD3|TNKS2|MKRN1|PSMA5|PSMA6|PSMA3|PSMA4|PSMA1|PSMA2|PSME3|PSME4|PSME1|PSME2|UBA52|PSMD10|PSMB11|PSMD12|PTEN|PSMD11|PSMD14|PSMD13|PSMA7|PSMB10|PSMA8|PSMB6|PSMB7|PSMB4|FRK|PSMB5|UBB|PSMB2|PSMB3|UBC|PSMB1|PSMF1|RPS27A|SHFM1|PSMB8|PSMB9|STUB1|AKT3|AKT2|TRIM27|CSNK2A1|AKT1|CSNK2B|CS…
APC:CDC20 MEDIATED DEGRADATION OF CELL CYCLE PROTEINS PRIOR TO SATISFATION OF THE CELL CYCLE CHECKPOINT%REACTOME%R-HSA-179419.1	68	-0.5970569	-2.1357594	0.0	1.5673881E-4	0.0028																				29	GTP hydrolysis and joining of the 60S ribosomal subunit	113	-1.6898	0.0348	0.0004	EIF4A2|RPL37A|EIF4A1|RPL24|RPL27|RPL26|RPL29|RPL28|RPS4Y2|RPL10|RPL12|RPL11|RPL36A|RPS27L|RPS4Y1|RPS15A|RPS3|RPL14|RPL13|RPL15|RPL18|RPL17|RPL19|RPL39L|RPL41|RPL35A|RPL23A|RPL3L|RPS26|RPS25|RPS28|RPS27|UBA52|EIF1AX|EIF3M|EIF3K|EIF3L|EIF3I|EIF3J|EIF3G|EIF3H|EIF3E|EIF3F|EIF3C|EIF3D|EIF3A|EIF3B|RPS27A|RPS14|RPS9|RPS7|RPS6|EIF4E|EIF4B|EIF4G1|RPS2|EIF2S2|EIF2S1|EIF2S3|EIF5|EIF5B|RPS29|RPL27A|EIF4H|RPS…
CDK-MEDIATED PHOSPHORYLATION AND REMOVAL OF CDC6%REACTOME DATABASE ID RELEASE 73%69017	68	-0.5974876	-2.1343622	0.0	1.4961432E-4	0.0028																				30	TCR signaling	119	-1.6932	0.0339	0.0006	NFKBIA|PSMC5|PSMC6|PSMC3|PSMC4|PSMC1|PSMC2|EVL|IKBKB|PSMD8|UBE2N|PSMD9|PSMD6|PSMD7|PSMD4|PDPK1|PSMD5|PSMD2|CDC34|PSMD3|PSMD1|TRAF6|IKBKG|BTRC|MAP3K7|PRKCQ|SKP1|UBE2V1|CHUK|HLA-DQA2|FBXW11|HLA-DQA1|PSMA5|HLA-DRB5|PSMA6|HLA-DRB4|PSMA3|PSMA4|HLA-DRB3|PSMA1|PLCG2|HLA-DRB1|PSMA2|PSME3|PSME4|PSME1|PSME2|UBA52|CARD11|PSMD10|PSMB11|PSMD12|PSMD11|PSMD14|PSMD13|CUL1|HLA-DPA1|BCL10|CSK|HLA-DQB2|MALT1|HLA-DQ…
ASSEMBLY OF THE PRE-REPLICATIVE COMPLEX%REACTOME%R-HSA-68867.4	63	-0.6035676	-2.1319716	0.0	1.539701E-4	0.003																				32	The citric acid (TCA) cycle and respiratory electron transport	174	-1.6944	0.0338	0.0002	NDUFC2|SURF1|NDUFC1|PDP2|UQCR11|UQCRQ|UQCR10|NDUFA13|NDUFA11|ACO2|COX7B|NDUFA12|SLC25A14|NDUFA10|MT-CYB|NDUFB9|COX7C|COX8A|NDUFB8|ETFA|NDUFB7|ETFB|NDUFB6|NDUFB5|ATP5J2|NDUFB4|COX5B|NDUFB3|COX5A|NDUFB2|NDUFB1|IDH2|SLC25A27|COX6C|LDHC|LDHB|D2HGDH|LDHA|NDUFA9|TACO1|NDUFA8|NDUFA7|COX6A1|NDUFA6|NDUFA5|ATP5G3|NDUFA3|ATP5G2|NDUFA2|COX6B1|ATP5G1|OGDH|NDUFA1|COX16|COX18|GSTZ1|SUCLA2|ATP5F1|COX11|COX14|COQ…
REGULATION OF APC C ACTIVATORS BETWEEN G1 S AND EARLY ANAPHASE%REACTOME DATABASE ID RELEASE 73%176408	75	-0.5862363	-2.1278336	0.0	1.6236439E-4	0.0033																				28	Hedgehog 'on' state	85	-1.6957	0.0342	0.0023	SHH|DHH|PSMC5|PSMC6|PSMC3|PSMC4|PSMC1|ULK3|PSMC2|DZIP1|SPOPL|SPOP|PSMD8|PSMD9|PSMD6|CDC73|PSMD7|PSMD4|PSMD5|PSMD2|PSMD3|PSMD1|CSNK1A1|PSMA5|ITCH|PSMA6|PSMA3|PSMA4|RBX1|PSMA1|PSMA2|PSME3|PSME4|CUL3|PSME1|SMO|PSME2|CDON|UBA52|GPR161|IHH|HHIP|PSMD10|BOC|PSMB11|GAS1|KIF3A|ARRB1|PSMD12|PSMD11|PSMD14|PTCH1|ARRB2|PSMD13|SMURF2|PSMA7|GLI1|PSMB10|GLI3|PSMA8|GLI2|PSMB6|PSMB7|SUFU|PSMB4|PSMB5|UBB|PSMB2|KIF7…
ANTIMICROBIAL PEPTIDES%REACTOME%R-HSA-6803157.2	26	-0.71959746	-2.1080854	0.0	2.5462647E-4	0.0054																				28	Metabolism of polyamines	58	-1.6973	0.0339	0.0025	OAZ1|PSMC5|OAZ2|PSMC6|PSMC3|OAZ3|PSMC4|PSMC1|AMD1|PSMC2|NQO1|PSMD8|PSMD9|PSMD6|PSMD7|PSMD4|PSMD5|PSMD2|PSMD3|PSMD1|PSMA5|PSMA6|PSMA3|PSMA4|PSMA1|PSMA2|PSME3|PSME4|AZIN2|PSME1|PSME2|AZIN1|PSMD10|PSMB11|PSMD12|PSMD11|PSMD14|PSMD13|SRM|PSMA7|PSMB10|PSMA8|PSMB6|PSMB7|PSMB4|PSMB5|PSMB2|PSMB3|PSMB1|PSMF1|ODC1|SHFM1|PSMB8|PSMB9|SAT1|AGMAT|SMS|PAOX
DNA REPLICATION PRE-INITIATION%REACTOME DATABASE ID RELEASE 73%69002	78	-0.573728	-2.1073096	0.0	2.534905E-4	0.0056																				28	Regulation of RUNX3 expression and activity	55	-1.7	0.0332	0.0029	PSMC5|PSMC6|PSMC3|PSMC4|PSMC1|PSMC2|EP300|PSMD8|PSMD9|PSMD6|PSMD7|PSMD4|PSMD5|PSMD2|PSMD3|PSMD1|PSMA5|PSMA6|PSMA3|PSMA4|PSMA1|PSMA2|PSME3|PSME1|PSME2|UBA52|PSMD10|PSMD12|PSMD11|PSMD14|PSMD13|SMURF2|PSMA7|PSMB10|PSMB6|PSMB7|PSMB4|PSMB5|CDKN2A|UBB|MDM2|PSMB2|PSMB3|UBC|PSMB1|PSMF1|RPS27A|SHFM1|PSMB8|PSMB9|SMURF1|TGFB1|RUNX3|CBFB|SRC
B CELL ACTIVATION%REACTOME%R-HSA-983705.1	108	-0.54484195	-2.1006763	0.0	2.9259626E-4	0.0067																				37	Major pathway of rRNA processing in the nucleolus and cytosol	183	-1.7043	0.0321	0.0002	RPL37A|RPL24|RPL27|RPL26|RPL29|RPL28|RPS4Y2|RPL10|RPL12|RPL11|RPL36A|RPS27L|RPS4Y1|RPS15A|RPS3|RPL14|RPL13|RPL15|RPL18|RPL17|RPL19|RPL39L|RPL41|RPL35A|RPL23A|RPL3L|RPS26|RPS25|RPS28|RPS27|UBA52|RCL1|TBL3|MPHOSPH10|LTV1|RPS27A|NOL11|RRP1|ERI1|DDX49|DDX47|LAS1L|WDR3|NOL12|FCF1|RIOK2|RIOK1|PWP2|CSNK1E|WDR46|TEX10|WDR43|GNL3|RRP9|NIP7|RPS14|NOL9|EXOSC10|FBL|PES1|UTP14A|RIOK3|UTP14C|WDR18|UTP15|WDR12|…
APC C:CDH1 MEDIATED DEGRADATION OF CDC20 AND OTHER APC C:CDH1 TARGETED PROTEINS IN LATE MITOSIS EARLY G1%REACTOME%R-HSA-174178.3	68	-0.5821847	-2.084347	0.0	3.8288653E-4	0.0091																				28	Degradation of GLI1 by the proteasome	60	-1.709	0.0308	0.0028	PSMC5|PSMC6|PSMC3|PSMC4|PSMC1|PSMC2|PSMD8|PSMD9|PSMD6|PSMD7|PSMD4|PSMD5|PSMD2|PSMD3|PSMD1|BTRC|SKP1|PSMA5|ITCH|PSMA6|PSMA3|PSMA4|RBX1|PSMA1|PSMA2|PSME3|PSME4|PSME1|PSME2|UBA52|PSMD10|PSMB11|PSMD12|PSMD11|PSMD14|PSMD13|CUL1|PSMA7|GLI1|PSMB10|PSMA8|PSMB6|PSMB7|SUFU|PSMB4|PSMB5|UBB|PSMB2|PSMB3|UBC|NUMB|PSMB1|PSMF1|RPS27A|SHFM1|PSMB8|PSMB9|PRKACG|PRKACA|PRKACB
RUNX1 REGULATES TRANSCRIPTION OF GENES INVOLVED IN DIFFERENTIATION OF HSCS%REACTOME%R-HSA-8939236.1	64	-0.5837129	-2.063082	0.0	5.277845E-4	0.013																				28	GLI3 is processed to GLI3R by the proteasome	60	-1.7127	0.0298	0.0027	PSMC5|PSMC6|PSMC3|PSMC4|PSMC1|PSMC2|PSMD8|PSMD9|PSMD6|PSMD7|PSMD4|PSMD5|PSMD2|PSMD3|PSMD1|BTRC|SKP1|CSNK1A1|PSMA5|PSMA6|PSMA3|PSMA4|RBX1|PSMA1|PSMA2|PSME3|PSME4|PSME1|PSME2|UBA52|PSMD10|PSMB11|PSMD12|PSMD11|PSMD14|PSMD13|CUL1|PSMA7|PSMB10|GLI3|PSMA8|PSMB6|PSMB7|SUFU|PSMB4|PSMB5|UBB|PSMB2|PSMB3|UBC|PSMB1|PSMF1|RPS27A|GSK3B|SHFM1|PSMB8|PSMB9|PRKACG|PRKACA|PRKACB
TRANSCRIPTION OF E2F TARGETS UNDER NEGATIVE CONTROL BY DREAM COMPLEX%REACTOME DATABASE ID RELEASE 73%1362277	18	-0.76459146	-2.0624542	0.0	5.2194146E-4	0.0133																				28	Regulation of RAS by GAPs	67	-1.7187	0.0282	0.001	PSMC5|PSMC6|PSMC3|KBTBD7|PSMC4|PSMC1|PSMC2|PSMD8|PSMD9|PSMD6|PSMD7|PSMD4|PSMD5|PSMD2|PSMD3|PSMD1|PSMA5|PSMA6|PSMA3|PSMA4|RBX1|PSMA1|PSMA2|PSME3|PSME4|CUL3|PSME1|PSME2|UBA52|PSMD10|PSMB11|PSMD12|PSMD11|PSMD14|PSMD13|PSMA7|PSMB10|PSMA8|PSMB6|PSMB7|PSMB4|PSMB5|UBB|PSMB2|PSMB3|UBC|SPRED3|PSMB1|SPRED2|PSMF1|SPRED1|RPS27A|SYNGAP1|SHFM1|HRAS|RASA3|PSMB8|RASA4|PSMB9|RASA1|RASA2|RASAL1|RASAL2|RASAL3|NRAS|…
APC C:CDC20 MEDIATED DEGRADATION OF SECURIN%REACTOME DATABASE ID RELEASE 73%174154	64	-0.58070004	-2.0569396	0.0	5.6204933E-4	0.0148																				28	Degradation of GLI2 by the proteasome	60	-1.7295	0.0259	0.0019	PSMC5|PSMC6|PSMC3|PSMC4|PSMC1|PSMC2|PSMD8|PSMD9|PSMD6|PSMD7|PSMD4|PSMD5|PSMD2|PSMD3|PSMD1|BTRC|SKP1|CSNK1A1|PSMA5|PSMA6|PSMA3|PSMA4|RBX1|PSMA1|PSMA2|PSME3|PSME4|PSME1|PSME2|UBA52|PSMD10|PSMB11|PSMD12|PSMD11|PSMD14|PSMD13|CUL1|PSMA7|PSMB10|PSMA8|GLI2|PSMB6|PSMB7|SUFU|PSMB4|PSMB5|UBB|PSMB2|PSMB3|UBC|PSMB1|PSMF1|RPS27A|GSK3B|SHFM1|PSMB8|PSMB9|PRKACG|PRKACA|PRKACB
SCF(SKP2)-MEDIATED DEGRADATION OF P27 P21%REACTOME%R-HSA-187577.3	54	-0.59603435	-2.0498123	0.0	6.615963E-4	0.0179																				37	rRNA processing in the nucleus and cytosol	193	-1.7324	0.0253	0	UBA52|RCL1|TBL3|MPHOSPH10|RPS27A|NOL11|NOP10|DDX49|DDX47|WDR3|FCF1|NAT10|THUMPD1|PWP2|WDR46|CSNK1E|WDR43|RRP9|RPS14|TRMT112|FBL|UTP14A|UTP14C|UTP15|WDR36|RPS9|RPS7|IMP3|DIMT1|RPS6|WDR75|IMP4|DDX52|UTP11L|UTP18|DIEXF|CIRH1A|NHP2L1|DKC1|NHP2|EXOSC7|HEATR1|EXOSC6|NOP2|EXOSC5|TSR3|EXOSC4|NOC4L|EXOSC9|NOL6|EXOSC8|RRP7A|EXOSC3|EMG1|EXOSC2|PDCD11|EXOSC1|BMS1|GAR1|DHX37|WBSCR22|RRP36|UTP20|RPS2|NOP14|NOP…
FCERI MEDIATED NF-KB ACTIVATION%REACTOME%R-HSA-2871837.2	79	-0.55437696	-2.0402002	0.0	8.154132E-4	0.0227																				29	L13a-mediated translational silencing of Ceruloplasmin expression	112	-1.7355	0.0247	0.0004	EIF4A2|RPL37A|EIF4A1|RPL24|RPL27|RPL26|RPL29|RPL28|RPS4Y2|RPL10|RPL12|RPL11|RPL36A|RPS27L|RPS4Y1|RPS15A|RPS3|RPL14|RPL13|RPL15|RPL18|RPL17|RPL19|RPL39L|RPL41|RPL35A|RPL23A|RPL3L|RPS26|RPS25|RPS28|RPS27|UBA52|EIF1AX|EIF3M|EIF3K|EIF3L|EIF3I|EIF3J|EIF3G|EIF3H|EIF3E|EIF3F|EIF3C|EIF3D|EIF3A|EIF3B|RPS27A|RPS14|RPS9|RPS7|RPS6|EIF4E|EIF4B|EIF4G1|RPS2|PABPC1|EIF2S2|EIF2S1|EIF2S3|RPS29|RPL27A|EIF4H|RPS20|R…
DEFECTIVE CFTR CAUSES CYSTIC FIBROSIS%REACTOME%R-HSA-5678895.2	56	-0.5889707	-2.0369735	0.0	8.329411E-4	0.0239																				38	DNA Damage Bypass	48	-1.7452	0.0224	0.0004	RAD18|RPS27A|UFD1L|PCNA|WDR48|UBA7|USP10|UBE2L6|VCP|RCHY1|POLD3|POLD4|DTL|RPA3|RBX1|RPA1|RPA2|POLD1|UBA52|POLD2|USP1|REV3L|POLI|TRIM25|POLK|CUL4A|POLE|POLH|RFC5|RFC3|RFC4|RFC1|UBE2B|USP43|RFC2|DDB1|REV1|ISG15|CUL4B|POLE4|MAD2L2|UBB|NPLOC4|KIAA0101|POLE2|UBC|POLE3|SPRTN
CDT1 ASSOCIATION WITH THE CDC6:ORC:ORIGIN COMPLEX%REACTOME DATABASE ID RELEASE 73%68827	54	-0.5945612	-2.031993	0.0	9.00423E-4	0.0266																				34	Separation of Sister Chromatids	169	-1.757	0.0203	0	PSMC5|PSMC6|PSMC3|PSMC4|PSMC1|PSMC2|PSMD8|PSMD9|PSMD6|PSMD7|PSMD4|NUP160|PSMD5|PSMD2|PSMD3|NUP85|PSMD1|PSMA5|PSMA6|RPS27|PSMA3|PSMA4|PSMA1|PSMA2|PSME3|PSME4|PPP2R5E|PSME1|PSME2|UBA52|PSMD10|PSMB11|PSMD12|PSMD11|PSMD14|PPP2R5B|PSMD13|PPP2R5A|PPP2R5C|PSMA7|SEC13|PSMB10|PSMA8|PSMB6|PSMB7|NUP133|PSMB4|PSMB5|UBB|PSMB2|PSMB3|UBC|PSMB1|PSMF1|RPS27A|SHFM1|PSMB8|PPP2CA|PSMB9|PPP2CB|PPP2R1B|PPP2R1A|ESPL1|N…
AUTODEGRADATION OF CDH1 BY CDH1:APC C%REACTOME DATABASE ID RELEASE 73%174084	63	-0.5737889	-2.0241334	0.0	0.0010421869	0.0316																				35	Lagging Strand Synthesis	20	-1.7758	0.0168	0.0041	RPA3|PCNA|RPA1|RPA2|POLD1|POLD2|POLD3|POLD4|RFC5|RFC3|RFC4|RFC1|PRIM2|LIG1|PRIM1|RFC2|POLA1|FEN1|POLA2|DNA2
UBIQUITIN MEDIATED DEGRADATION OF PHOSPHORYLATED CDC25A%REACTOME%R-HSA-69601.3	48	-0.60264826	-2.0221329	0.0	0.0010524528	0.0328																				38	Translesion synthesis by Y family DNA polymerases bypasses lesions on DNA template	39	-1.7825	0.016	0.0023	RPS27A|UFD1L|PCNA|UBA7|USP10|UBE2L6|VCP|RCHY1|POLD3|POLD4|RPA3|RPA1|RPA2|POLD1|UBA52|POLD2|REV3L|POLI|TRIM25|POLK|POLE|POLH|RFC5|RFC3|RFC4|RFC1|USP43|RFC2|REV1|ISG15|POLE4|MAD2L2|UBB|NPLOC4|KIAA0101|POLE2|UBC|POLE3|SPRTN
P53-INDEPENDENT DNA DAMAGE RESPONSE%REACTOME DATABASE ID RELEASE 73%69610	48	-0.60264826	-2.0174408	0.0	0.001148695	0.0368																				28	ABC-family proteins mediated transport	103	-1.7869	0.0155	0	CFTR|PSMC5|ABCA6|PSMC6|PSMC3|PSMC4|PSMC1|VCP|PSMC2|ABCB6|ABCB4|SEL1L|PSMD8|PSMD9|PSMD6|PSMD7|PSMD4|PSMD5|PSMD2|PSMD3|PSMD1|ABCA10|ABCG4|ABCB5|ABCB8|ABCB9|ABCA2|ABCA3|ABCA5|ABCA9|PSMA5|ERLIN1|ABCA7|PSMA6|ABCA8|PSMA3|ERLIN2|ABCD2|PSMA4|ABCD3|PSMA1|ABCC10|PSMA2|ABCC11|PSME3|PEX3|PSME4|RNF185|ABCF1|PSME1|PEX19|PSME2|ABCB10|UBA52|PSMD10|PSMB11|PSMD12|PSMD11|PSMD14|PSMD13|ABCD1|PSMA7|PSMB10|PSMA8|ABCC2…
P53-INDEPENDENT G1 S DNA DAMAGE CHECKPOINT%REACTOME%R-HSA-69613.2	48	-0.60264826	-2.0057454	0.0	0.001350848	0.0444																				28	Regulation of mRNA stability by proteins that bind AU-rich elements	84	-1.7951	0.0141	0	SET|ANP32A|PSMC5|PSMC6|PSMC3|PSMC4|PSMC1|PSMC2|PSMD8|PSMD9|PSMD6|PSMD7|PSMD4|PSMD5|PSMD2|PSMD3|PSMD1|PSMA5|PSMA6|PSMA3|PSMA4|PSMA1|PSMA2|PSME3|PSME4|PSME1|PSME2|UBA52|PSMD10|PSMB11|PSMD12|PSMD11|PSMD14|PSMD13|PSMA7|PSMB10|PSMA8|PSMB6|PSMB7|PSMB4|PSMB5|UBB|PSMB2|PSMB3|UBC|PSMB1|PSMF1|RPS27A|SHFM1|PSMB8|PSMB9|PARN|ZFP36L1|EXOSC7|EXOSC6|EXOSC5|EXOSC4|EXOSC9|EXOSC8|EXOSC3|EXOSC2|EXOSC1|HSPA8|TNFSF13|…
TRANSCRIPTION OF E2F TARGETS UNDER NEGATIVE CONTROL BY P107 (RBL1) AND P130 (RBL2) IN COMPLEX WITH HDAC1%REACTOME%R-HSA-1362300.2	16	-0.76765233	-2.0054674	0.0	0.0013227515	0.0446																				32	Complex I biogenesis	55	-1.8068	0.0129	0.0004	NDUFC2|NDUFC1|NDUFA13|NDUFA11|NDUFA12|NDUFA10|NDUFB9|NDUFB8|NDUFB7|NDUFB6|NDUFB5|ACAD9|NDUFB4|NDUFB3|NDUFAB1|NDUFB2|NDUFB1|NUBPL|ECSIT|NDUFA9|NDUFA8|NDUFA7|NDUFA6|NDUFA5|NDUFA3|NDUFB10|NDUFA2|NDUFB11|NDUFA1|NDUFV3|NDUFV2|NDUFV1|TIMMDC1|MT-ND6|MT-ND4|MT-ND5|MT-ND2|MT-ND3|MT-ND1|NDUFAF6|NDUFS8|NDUFAF7|NDUFS7|NDUFAF4|NDUFS6|NDUFAF5|NDUFAF2|NDUFAF3|NDUFS5|NDUFAF1|NDUFS4|NDUFS3|NDUFS2|NDUFS1|TMEM126B
SCF-BETA-TRCP MEDIATED DEGRADATION OF EMI1%REACTOME DATABASE ID RELEASE 73%174113	51	-0.5923169	-2.0049684	0.0	0.0013077003	0.0452																				28	Dectin-1 mediated noncanonical NF-kB signaling	60	-1.8071	0.013	0.0002	PSMC5|PSMC6|PSMC3|PSMC4|PSMC1|PSMC2|PSMD8|PSMD9|PSMD6|PSMD7|PSMD4|MAP3K14|PSMD5|PSMD2|PSMD3|PSMD1|BTRC|SKP1|CHUK|FBXW11|PSMA5|PSMA6|PSMA3|PSMA4|PSMA1|PSMA2|PSME3|PSME4|PSME1|PSME2|UBA52|NFKB2|PSMD10|PSMB11|PSMD12|PSMD11|PSMD14|PSMD13|CUL1|RELA|PSMA7|PSMB10|PSMA8|PSMB6|PSMB7|PSMB4|PSMB5|UBB|PSMB2|PSMB3|UBC|PSMB1|PSMF1|RPS27A|SHFM1|UBA3|PSMB8|PSMB9|UBE2M|RELB
SCAVENGING OF HEME FROM PLASMA%REACTOME DATABASE ID RELEASE 73%2168880	13	-0.8079067	-1.9979981	4.1152263E-4	0.0014489347	0.0511																				28	Asymmetric localization of PCP proteins	64	-1.8141	0.0122	0.0008	PSMC5|PSMC6|PSMC3|PSMC4|PSMC1|PSMC2|SCRIB|PRICKLE1|FZD1|PSMD8|FZD3|PSMD9|FZD2|PSMD6|VANGL2|PSMD7|PSMD4|PSMD5|PSMD2|PSMD3|PSMD1|PSMA5|PSMA6|PSMA3|PSMA4|PSMA1|PSMA2|PSME3|PSME4|PSME1|PSME2|UBA52|PSMD10|PSMB11|PSMD12|PSMD11|PSMD14|PSMD13|SMURF2|PSMA7|PSMB10|PSMA8|PSMB6|PSMB7|PSMB4|PSMB5|UBB|PSMB2|PSMB3|UBC|PSMB1|FZD5|PSMF1|FZD4|RPS27A|SHFM1|PSMB8|FZD8|PSMB9|SMURF1|DVL2|PARD6A|FZD7|WNT5A
REGULATION OF ACTIVATED PAK-2P34 BY PROTEASOME MEDIATED DEGRADATION%REACTOME%R-HSA-211733.1	47	-0.5951416	-1.9902344	0.0	0.0016522752	0.0595																				35	Resolution of AP sites via the multiple-nucleotide patch replacement pathway	25	-1.815	0.0122	0.002	PCNA|POLD3|POLD4|PARP2|PARP1|LIG1|FEN1|RPA3|RPA1|RPA2|POLD1|POLD2|APEX1|PARG|POLE|POLB|ADPRHL2|RFC5|RFC3|RFC4|RFC1|RFC2|POLE4|POLE2|POLE3
AUTODEGRADATION OF THE E3 UBIQUITIN LIGASE COP1%REACTOME DATABASE ID RELEASE 73%349425	48	-0.5921955	-1.9894705	0.0	0.0016279912	0.0599																				28	Cellular response to hypoxia	75	-1.8163	0.0121	0.0008	VEGFA|PSMC5|PSMC6|PSMC3|PSMC4|PSMC1|PSMC2|UBE2D2|CITED2|UBE2D3|EP300|UBE2D1|PSMD8|PSMD9|PSMD6|PSMD7|HIGD1A|PSMD4|PSMD5|PSMD2|PSMD3|PSMD1|PSMA5|PSMA6|PSMA3|PSMA4|RBX1|PSMA1|PSMA2|PSME3|PSME4|PSME1|CUL2|PSME2|UBA52|PSMD10|PSMB11|PSMD12|PSMD11|PSMD14|PSMD13|PSMA7|PSMB10|PSMA8|PSMB6|PSMB7|PSMB4|PSMB5|UBB|PSMB2|PSMB3|EPO|UBC|PSMB1|PSMF1|RPS27A|SHFM1|PSMB8|PSMB9|LIMD1|EGLN1|EGLN3|HIF1AN|EGLN2|WTIP|CREB…
AUF1 (HNRNP D0) BINDS AND DESTABILIZES MRNA%REACTOME%R-HSA-450408.3	49	-0.592331	-1.9894277	0.0	0.0015944918	0.06																				28	PCP CE pathway	91	-1.8304	0.0102	0	PSMC5|PSMC6|PSMC3|PSMC4|PSMC1|PSMC2|SCRIB|PRICKLE1|FZD1|PSMD8|FZD3|PSMD9|FZD2|PSMD6|VANGL2|PSMD7|PSMD4|PSMD5|PSMD2|PSMD3|PSMD1|CLTC|CLTA|AP2A1|PRKCB|PSMA5|AP2A2|PSMA6|PSMA3|PSMA4|PSMA1|PSMA2|PSME3|PSME4|AP2M1|PSME1|PSME2|UBA52|PSMD10|PSMB11|PSMD12|PSMD11|PSMD14|ARRB2|PSMD13|SMURF2|PFN1|PSMA7|PSMB10|PSMA8|PSMB6|PSMB7|PSMB4|AP2S1|PSMB5|UBB|CLTB|PSMB2|PSMB3|UBC|PSMB1|FZD5|AP2B1|PSMF1|FZD4|RPS27A|SHF…
ISG15 ANTIVIRAL MECHANISM%REACTOME DATABASE ID RELEASE 73%1169408	66	-0.55645263	-1.9842948	0.0	0.0017239056	0.0663																				30	Downstream TCR signaling	97	-1.8349	0.0097	0	NFKBIA|PSMC5|PSMC6|PSMC3|PSMC4|PSMC1|PSMC2|IKBKB|PSMD8|UBE2N|PSMD9|PSMD6|PSMD7|PSMD4|PDPK1|PSMD5|PSMD2|CDC34|PSMD3|PSMD1|TRAF6|IKBKG|BTRC|MAP3K7|PRKCQ|SKP1|UBE2V1|CHUK|HLA-DQA2|FBXW11|HLA-DQA1|PSMA5|HLA-DRB5|PSMA6|HLA-DRB4|PSMA3|PSMA4|HLA-DRB3|PSMA1|HLA-DRB1|PSMA2|PSME3|PSME4|PSME1|PSME2|UBA52|CARD11|PSMD10|PSMB11|PSMD12|PSMD11|PSMD14|PSMD13|CUL1|HLA-DPA1|BCL10|HLA-DQB2|MALT1|HLA-DQB1|RELA|PSMA7|…
UBIQUITIN-DEPENDENT DEGRADATION OF CYCLIN D%REACTOME%R-HSA-75815.3	48	-0.5903698	-1.9838717	0.0	0.0016896966	0.0664																				28	Antigen processing-Cross presentation	99	-1.8358	0.0097	0	PSMC5|PSMC6|PSMC3|PSMC4|PSMC1|PSMC2|IKBKB|PSMD8|PSMD9|PSMD6|PSMD7|TLR1|PSMD4|HLA-B|PSMD5|HLA-C|PSMD2|HLA-F|PSMD3|HLA-G|PSMD1|HLA-E|IKBKG|TLR2|CHUK|PSMA5|PSMA6|PSMA3|PSMA4|PSMA1|PSMA2|PSME3|PSME4|PSME1|HLA-A|PSME2|UBA52|B2M|PSMD10|PSMB11|PSMD12|PSMD11|PSMD14|LY96|PSMD13|SEC22B|PSMA7|PSMB10|PSMA8|CD14|PSMB6|TLR4|PSMB7|PSMB4|PSMB5|UBB|PSMB2|PSMB3|UBC|PSMB1|PSMF1|RPS27A|SHFM1|PSMB8|PSMB9|ITGAV|FCGR1A…
DOWNSTREAM SIGNALING EVENTS OF B CELL RECEPTOR (BCR)%REACTOME DATABASE ID RELEASE 73%1168372	76	-0.54375696	-1.9800107	0.0	0.001773272	0.071																				38	Termination of translesion DNA synthesis	32	-1.8423	0.009	0.0006	RPS27A|PCNA|UBA7|USP10|UBE2L6|POLD3|POLD4|RPA3|RPA1|RPA2|POLD1|UBA52|POLD2|POLI|TRIM25|POLK|POLE|POLH|RFC5|RFC3|RFC4|RFC1|USP43|RFC2|REV1|ISG15|POLE4|UBB|KIAA0101|POLE2|UBC|POLE3
VPU MEDIATED DEGRADATION OF CD4%REACTOME DATABASE ID RELEASE 73%180534	49	-0.58413005	-1.9735994	0.0	0.0018857103	0.0764																				28	NIK-->noncanonical NF-kB signaling	59	-1.8442	0.0089	0.0002	PSMC5|PSMC6|PSMC3|PSMC4|PSMC1|PSMC2|PSMD8|PSMD9|PSMD6|PSMD7|PSMD4|MAP3K14|PSMD5|PSMD2|PSMD3|PSMD1|BTRC|SKP1|CHUK|FBXW11|PSMA5|PSMA6|PSMA3|PSMA4|PSMA1|PSMA2|PSME3|PSME4|PSME1|PSME2|UBA52|NFKB2|PSMD10|PSMB11|PSMD12|PSMD11|PSMD14|PSMD13|CUL1|PSMA7|PSMB10|PSMA8|PSMB6|PSMB7|PSMB4|PSMB5|UBB|PSMB2|PSMB3|UBC|PSMB1|PSMF1|RPS27A|SHFM1|UBA3|PSMB8|PSMB9|UBE2M|RELB
REGULATION OF APOPTOSIS%REACTOME%R-HSA-169911.2	50	-0.58236796	-1.9735663	2.092488E-4	0.0018504017	0.0765																				28	p53-Dependent G1 S DNA damage checkpoint	66	-1.8493	0.0084	0.0002	PSMC5|PSMC6|RFWD2|PSMC3|PSMC4|PSMC1|PSMC2|PSMD8|PSMD9|PSMD6|PSMD7|PSMD4|PSMD5|PSMD2|PSMD3|PSMD1|PSMA5|PSMA6|PSMA3|PSMA4|PSMA1|PSMA2|PSME3|PSME4|PSME1|PSME2|UBA52|PSMD10|PSMB11|PSMD12|PSMD11|PSMD14|PSMD13|CCNE2|CCNE1|PSMA7|TP53|PSMB10|PSMA8|PSMB6|PSMB7|PHF20|PSMB4|CHEK2|PSMB5|CDKN2A|UBB|MDM2|PSMB2|MDM4|PSMB3|ATM|UBC|PSMB1|PSMF1|CDKN1A|RPS27A|CDKN1B|SHFM1|PSMB8|PSMB9|CDK2|ZNF385A|CCNA2|CCNA1|PCBP4
DNA STRAND ELONGATION%REACTOME DATABASE ID RELEASE 73%69190	31	-0.64278007	-1.9679637	2.0546537E-4	0.0020064588	0.0842																				28	p53-Dependent G1 DNA Damage Response	66	-1.8494	0.0085	0.0006	PSMC5|PSMC6|RFWD2|PSMC3|PSMC4|PSMC1|PSMC2|PSMD8|PSMD9|PSMD6|PSMD7|PSMD4|PSMD5|PSMD2|PSMD3|PSMD1|PSMA5|PSMA6|PSMA3|PSMA4|PSMA1|PSMA2|PSME3|PSME4|PSME1|PSME2|UBA52|PSMD10|PSMB11|PSMD12|PSMD11|PSMD14|PSMD13|CCNE2|CCNE1|PSMA7|TP53|PSMB10|PSMA8|PSMB6|PSMB7|PHF20|PSMB4|CHEK2|PSMB5|CDKN2A|UBB|MDM2|PSMB2|MDM4|PSMB3|ATM|UBC|PSMB1|PSMF1|CDKN1A|RPS27A|CDKN1B|SHFM1|PSMB8|PSMB9|CDK2|ZNF385A|CCNA2|CCNA1|PCBP4
VIF-MEDIATED DEGRADATION OF APOBEC3G%REACTOME DATABASE ID RELEASE 73%180585	48	-0.58516145	-1.9627072	4.0966817E-4	0.0021707297	0.0925																				32	Respiratory electron transport, ATP synthesis by chemiosmotic coupling, and heat production by uncoupling proteins.	124	-1.8509	0.0085	0	NDUFC2|SURF1|NDUFC1|UQCR11|UQCRQ|UQCR10|NDUFA13|NDUFA11|COX7B|NDUFA12|SLC25A14|NDUFA10|MT-CYB|NDUFB9|COX7C|COX8A|NDUFB8|ETFA|NDUFB7|ETFB|NDUFB6|NDUFB5|ATP5J2|NDUFB4|COX5B|NDUFB3|COX5A|NDUFB2|NDUFB1|SLC25A27|COX6C|NDUFA9|TACO1|NDUFA8|NDUFA7|COX6A1|NDUFA6|NDUFA5|ATP5G3|NDUFA3|ATP5G2|NDUFA2|COX6B1|ATP5G1|NDUFA1|COX16|COX18|ATP5F1|COX11|COX14|COQ10B|COQ10A|ETFDH|CYCS|COX20|TIMMDC1|ATP5S|MT-ND6|MT-ND4…
CARGO CONCENTRATION IN THE ER%REACTOME%R-HSA-5694530.1	27	-0.66391313	-1.9600554	4.0494028E-4	0.0022541569	0.0975																				28	Stabilization of p53	57	-1.8735	0.0064	0	PSMC5|PSMC6|RFWD2|PSMC3|PSMC4|PSMC1|PSMC2|PSMD8|PSMD9|PSMD6|PSMD7|PSMD4|PSMD5|PSMD2|PSMD3|PSMD1|PSMA5|PSMA6|PSMA3|PSMA4|PSMA1|PSMA2|PSME3|PSME4|PSME1|PSME2|UBA52|PSMD10|PSMB11|PSMD12|PSMD11|PSMD14|PSMD13|PSMA7|TP53|PSMB10|PSMA8|PSMB6|PSMB7|PHF20|PSMB4|CHEK2|PSMB5|CDKN2A|UBB|MDM2|PSMB2|MDM4|PSMB3|ATM|UBC|PSMB1|PSMF1|RPS27A|SHFM1|PSMB8|PSMB9
CYCLIN A B1 B2 ASSOCIATED EVENTS DURING G2 M TRANSITION%REACTOME DATABASE ID RELEASE 73%69273	20	-0.7070512	-1.9522113	2.0408163E-4	0.002541135	0.1112																				28	Regulation of ornithine decarboxylase (ODC)	51	-1.8778	0.006	0	OAZ1|PSMC5|OAZ2|PSMC6|PSMC3|OAZ3|PSMC4|PSMC1|PSMC2|NQO1|PSMD8|PSMD9|PSMD6|PSMD7|PSMD4|PSMD5|PSMD2|PSMD3|PSMD1|PSMA5|PSMA6|PSMA3|PSMA4|PSMA1|PSMA2|PSME3|PSME4|PSME1|PSME2|AZIN1|PSMD10|PSMB11|PSMD12|PSMD11|PSMD14|PSMD13|PSMA7|PSMB10|PSMA8|PSMB6|PSMB7|PSMB4|PSMB5|PSMB2|PSMB3|PSMB1|PSMF1|ODC1|SHFM1|PSMB8|PSMB9
DEGRADATION OF AXIN%REACTOME%R-HSA-4641257.2	52	-0.5748399	-1.9504479	0.0	0.002572307	0.1139																				28	Activation of NF-kappaB in B cells	67	-1.8796	0.006	0.0004	NFKBIA|PSMC5|PSMC6|PSMC3|PSMC4|PSMC1|PSMC2|REL|NFKBIE|NFKBIB|IKBKB|PSMD8|PSMD9|PSMD6|PSMD7|PSMD4|PSMD5|PSMD2|PSMD3|PSMD1|IKBKG|BTRC|MAP3K7|SKP1|CHUK|FBXW11|PRKCB|PSMA5|PSMA6|PSMA3|PSMA4|PSMA1|PSMA2|PSME3|PSME4|PSME1|PSME2|UBA52|CARD11|PSMD10|PSMB11|PSMD12|PSMD11|PSMD14|PSMD13|CUL1|BCL10|MALT1|RELA|PSMA7|PSMB10|PSMA8|PSMB6|PSMB7|PSMB4|PSMB5|UBB|PSMB2|PSMB3|UBC|PSMB1|PSMF1|RPS27A|SHFM1|NFKB1|PSMB8|…
ER-PHAGOSOME PATHWAY%REACTOME%R-HSA-1236974.4	80	-0.5276122	-1.9469477	0.0	0.0026889972	0.1212																				28	Hedgehog ligand biogenesis	65	-1.8924	0.0051	0.0002	SHH|DHH|GPC5|PSMC5|PSMC6|PSMC3|PSMC4|PSMC1|VCP|PSMC2|NOTUM|SEL1L|PSMD8|PSMD9|PSMD6|PSMD7|PSMD4|PSMD5|PSMD2|PSMD3|PSMD1|ADAM17|PSMA5|PSMA6|PSMA3|PSMA4|PSMA1|PSMA2|PSME3|PSME4|PSME1|PSME2|UBA52|IHH|PSMD10|PSMB11|PSMD12|PSMD11|PSMD14|PSMD13|PSMA7|PSMB10|PSMA8|PSMB6|PSMB7|PSMB4|PSMB5|UBB|PSMB2|PSMB3|UBC|PSMB1|PSMF1|RPS27A|SHFM1|PSMB8|PSMB9|DERL2|ERLEC1|OS9|HHAT|SYVN1|P4HB|SCUBE2|DISP2
RESPIRATORY ELECTRON TRANSPORT%REACTOME DATABASE ID RELEASE 73%611105	89	-0.5202599	-1.9453231	0.0	0.002699495	0.1237																				28	Degradation of DVL	57	-1.8944	0.005	0	PSMC5|PSMC6|PSMC3|PSMC4|PSMC1|PSMC2|PSMD8|PSMD9|PSMD6|PSMD7|PSMD4|PSMD5|PSMD2|PSMD3|PSMD1|PSMA5|PSMA6|PSMA3|PSMA4|RBX1|PSMA1|PSMA2|PSME3|PSME4|CUL3|PSME1|PSME2|UBA52|PSMD10|PSMB11|PSMD12|PSMD11|PSMD14|PSMD13|PSMA7|PSMB10|PSMA8|PSMB6|PSMB7|PSMB4|PSMB5|UBB|PSMB2|PSMB3|UBC|PSMB1|PSMF1|RPS27A|SHFM1|PSMB8|PSMB9|DVL2|HECW1|DVL3|KLHL12|DVL1|DACT1
THE ROLE OF GTSE1 IN G2 M PROGRESSION AFTER G2 CHECKPOINT%REACTOME%R-HSA-8852276.2	53	-0.5696641	-1.940983	0.0	0.0028630993	0.1325																				28	ABC transporter disorders	77	-1.9081	0.0041	0.0004	CFTR|PSMC5|PSMC6|PSMC3|PSMC4|PSMC1|VCP|PSMC2|ABCB6|ABCB4|SEL1L|PSMD8|PSMD9|PSMD6|PSMD7|PSMD4|PSMD5|PSMD2|PSMD3|PSMD1|ABCA1|ABCA3|PSMA5|ERLIN1|PSMA6|PSMA3|ERLIN2|PSMA4|PSMA1|PSMA2|PSME3|PSME4|RNF185|PSME1|PSME2|ABCD4|UBA52|PSMD10|PSMB11|PSMD12|PSMD11|PSMD14|PSMD13|ABCD1|PSMA7|PSMB10|PSMA8|ABCC2|PSMB6|PSMB7|PSMB4|ABCC8|PSMB5|UBB|PSMB2|ABCC6|PSMB3|APOA1|UBC|ABCC9|PSMB1|PSMF1|RPS27A|SHFM1|PSMB8|PSMB9…
FBXL7 DOWN-REGULATES AURKA DURING MITOTIC ENTRY AND IN EARLY MITOSIS%REACTOME DATABASE ID RELEASE 73%8854050	51	-0.5728516	-1.9365975	0.0	0.0030044033	0.1407																				28	Hh mutants that don't undergo autocatalytic processing are degraded by ERAD	56	-1.9082	0.0042	0.0004	SHH|PSMC5|PSMC6|PSMC3|PSMC4|PSMC1|VCP|PSMC2|SEL1L|PSMD8|PSMD9|PSMD6|PSMD7|PSMD4|PSMD5|PSMD2|PSMD3|PSMD1|PSMA5|PSMA6|PSMA3|PSMA4|PSMA1|PSMA2|PSME3|PSME4|PSME1|PSME2|UBA52|PSMD10|PSMB11|PSMD12|PSMD11|PSMD14|PSMD13|PSMA7|PSMB10|PSMA8|PSMB6|PSMB7|PSMB4|PSMB5|UBB|PSMB2|PSMB3|UBC|PSMB1|PSMF1|RPS27A|SHFM1|PSMB8|PSMB9|DERL2|ERLEC1|OS9|SYVN1
CROSS-PRESENTATION OF SOLUBLE EXOGENOUS ANTIGENS (ENDOSOMES)%REACTOME%R-HSA-1236978.1	46	-0.5805754	-1.9334832	2.0790022E-4	0.0030944427	0.1469																				28	Regulation of RUNX2 expression and activity	71	-1.9151	0.0039	0.0004	TWIST1|PSMC5|PSMC6|PSMC3|PSMC4|PSMC1|PSMC2|PSMD8|PSMD9|PSMD6|PSMD7|PSMD4|PSMD5|PSMD2|PSMD3|PSMD1|SKP1|PSMA5|PSMA6|PSMA3|PSMA4|RBX1|PSMA1|PSMA2|PSME3|PSME4|PSME1|PSME2|UBA52|PSMD10|ESRRA|PSMB11|NR3C1|PSMD12|PSMD11|PSMD14|PSMD13|CUL1|MSX2|PSMA7|NKX3-2|ESR1|PSMB10|PSMA8|PSMB6|PSMB7|PSMB4|PSMB5|UBB|PSMB2|PSMB3|UBC|PSMB1|PSMF1|RPS27A|GSK3B|SHFM1|PSMB8|PSMB9|BMP2|STAT1|SKP2|SMURF1|STUB1|WWP1|DLX5|DLX6|…
HH MUTANTS ABROGATE LIGAND SECRETION%REACTOME DATABASE ID RELEASE 73%5387390	53	-0.5678835	-1.9324006	0.0	0.0031050781	0.1496																				28	G1 S DNA Damage Checkpoints	68	-1.9182	0.0037	0	PSMC5|PSMC6|RFWD2|PSMC3|PSMC4|PSMC1|PSMC2|PSMD8|PSMD9|PSMD6|PSMD7|PSMD4|PSMD5|PSMD2|PSMD3|PSMD1|PSMA5|PSMA6|PSMA3|PSMA4|PSMA1|PSMA2|PSME3|PSME4|PSME1|PSME2|UBA52|PSMD10|PSMB11|PSMD12|PSMD11|PSMD14|PSMD13|CCNE2|CDC25A|CCNE1|PSMA7|TP53|PSMB10|PSMA8|PSMB6|PSMB7|PHF20|PSMB4|CHEK2|PSMB5|CDKN2A|UBB|MDM2|PSMB2|MDM4|PSMB3|ATM|UBC|PSMB1|PSMF1|CDKN1A|RPS27A|CDKN1B|SHFM1|PSMB8|PSMB9|CDK2|ZNF385A|CCNA2|CCNA1…
OXYGEN-DEPENDENT PROLINE HYDROXYLATION OF HYPOXIA-INDUCIBLE FACTOR ALPHA%REACTOME%R-HSA-1234176.2	58	-0.55360794	-1.9210975	0.0	0.0036963813	0.1781																				28	Negative regulation of NOTCH4 signaling	53	-1.9202	0.0037	0	PSMC5|PSMC6|PSMC3|PSMC4|PSMC1|PSMC2|TACC3|PSMD8|PSMD9|PSMD6|PSMD7|PSMD4|NOTCH4|PSMD5|PSMD2|PSMD3|PSMD1|SKP1|PSMA5|PSMA6|PSMA3|PSMA4|RBX1|PSMA1|PSMA2|PSME3|PSME1|PSME2|UBA52|PSMD10|PSMD12|PSMD11|PSMD14|PSMD13|CUL1|PSMA7|PSMB10|PSMB6|PSMB7|PSMB4|PSMB5|UBB|PSMB2|PSMB3|UBC|PSMB1|PSMF1|RPS27A|SHFM1|PSMB8|PSMB9|AKT1|YWHAZ
NEGATIVE REGULATION OF NOTCH4 SIGNALING%REACTOME DATABASE ID RELEASE 73%9604323	51	-0.5632101	-1.9201947	0.0	0.0036919094	0.1806																				28	Oxygen-dependent proline hydroxylation of Hypoxia-inducible Factor Alpha	66	-1.9211	0.0037	0	PSMC5|PSMC6|PSMC3|PSMC4|PSMC1|PSMC2|UBE2D2|UBE2D3|UBE2D1|PSMD8|PSMD9|PSMD6|PSMD7|PSMD4|PSMD5|PSMD2|PSMD3|PSMD1|PSMA5|PSMA6|PSMA3|PSMA4|RBX1|PSMA1|PSMA2|PSME3|PSME4|PSME1|CUL2|PSME2|UBA52|PSMD10|PSMB11|PSMD12|PSMD11|PSMD14|PSMD13|PSMA7|PSMB10|PSMA8|PSMB6|PSMB7|PSMB4|PSMB5|UBB|PSMB2|PSMB3|UBC|PSMB1|PSMF1|RPS27A|SHFM1|PSMB8|PSMB9|LIMD1|EGLN1|EGLN3|EGLN2|WTIP|AJUBA|EPAS1|HIF1A|VHL|HIF3A|TCEB2|TCEB1
G1 S DNA DAMAGE CHECKPOINTS%REACTOME%R-HSA-69615.2	60	-0.54743195	-1.9181541	0.0	0.0037496814	0.1857																				28	Hh mutants abrogate ligand secretion	59	-1.9324	0.0031	0	SHH|DHH|PSMC5|PSMC6|PSMC3|PSMC4|PSMC1|VCP|PSMC2|SEL1L|PSMD8|PSMD9|PSMD6|PSMD7|PSMD4|PSMD5|PSMD2|PSMD3|PSMD1|PSMA5|PSMA6|PSMA3|PSMA4|PSMA1|PSMA2|PSME3|PSME4|PSME1|PSME2|UBA52|IHH|PSMD10|PSMB11|PSMD12|PSMD11|PSMD14|PSMD13|PSMA7|PSMB10|PSMA8|PSMB6|PSMB7|PSMB4|PSMB5|UBB|PSMB2|PSMB3|UBC|PSMB1|PSMF1|RPS27A|SHFM1|PSMB8|PSMB9|DERL2|ERLEC1|OS9|HHAT|SYVN1
REGULATION OF RUNX2 EXPRESSION AND ACTIVITY%REACTOME%R-HSA-8939902.1	61	-0.5469007	-1.9151493	4.1416442E-4	0.003863783	0.1933																				28	Cross-presentation of soluble exogenous antigens (endosomes)	50	-1.9335	0.0031	0.0002	PSMC5|PSMC6|PSMC3|PSMC4|PSMC1|PSMC2|PSMD8|PSMD9|PSMD6|PSMD7|PSMD4|PSMD5|PSMD2|PSMD3|PSMD1|PSMA5|PSMA6|PSMA3|PSMA4|PSMA1|PSMA2|PSME3|PSME4|PSME1|PSME2|PSMD10|PSMB11|PSMD12|PSMD11|PSMD14|PSMD13|PSMA7|PSMB10|PSMA8|PSMB6|PSMB7|PSMB4|PSMB5|PSMB2|PSMB3|PSMB1|PSMF1|CD207|SHFM1|PSMB8|PSMB9|MRC2|MRC1|FCGR1A|FCGR1B
ANTIGEN ACTIVATES B CELL RECEPTOR (BCR) LEADING TO GENERATION OF SECOND MESSENGERS%REACTOME%R-HSA-983695.3	32	-0.62016	-1.9094	0.0010305028	0.0041721207	0.2092																				28	FBXL7 down-regulates AURKA during mitotic entry and in early mitosis	55	-1.9366	0.003	0	PSMC5|PSMC6|PSMC3|PSMC4|PSMC1|PSMC2|PSMD8|PSMD9|PSMD6|PSMD7|PSMD4|PSMD5|PSMD2|PSMD3|PSMD1|SKP1|PSMA5|PSMA6|PSMA3|PSMA4|RBX1|PSMA1|PSMA2|PSME3|PSME4|PSME1|PSME2|UBA52|PSMD10|PSMB11|PSMD12|PSMD11|PSMD14|PSMD13|CUL1|PSMA7|PSMB10|PSMA8|PSMB6|PSMB7|PSMB4|PSMB5|UBB|PSMB2|PSMB3|UBC|PSMB1|PSMF1|RPS27A|SHFM1|PSMB8|PSMB9|AURKA|FBXL7|FBXL18
HH MUTANTS THAT DON'T UNDERGO AUTOCATALYTIC PROCESSING ARE DEGRADED BY ERAD%REACTOME DATABASE ID RELEASE 73%5362768	52	-0.56285775	-1.9081933	4.0983607E-4	0.0041864873	0.2128																				28	The role of GTSE1 in G2 M progression after G2 checkpoint	60	-1.941	0.0029	0	PSMC5|PSMC6|PSMC3|PSMC4|PSMC1|PSMC2|PSMD8|PSMD9|PSMD6|PSMD7|PSMD4|PSMD5|PSMD2|PSMD3|PSMD1|GTSE1|FKBPL|PSMA5|PSMA6|PSMA3|PSMA4|PSMA1|PSMA2|PSME3|PSME4|PSME1|PSME2|UBA52|HSP90AB1|PSMD10|PSMB11|PSMD12|PSMD11|PSMD14|PSMD13|CDK1|PSMA7|TP53|PSMB10|PSMA8|PSMB6|PSMB7|PSMB4|CCNB1|PSMB5|UBB|PSMB2|PSMB3|UBC|PSMB1|PSMF1|CDKN1A|RPS27A|SHFM1|PSMB8|PSMB9|CCNB2|PLK1|HSP90AA1|MAPRE1
ABC TRANSPORTER DISORDERS%REACTOME%R-HSA-5619084.4	64	-0.54232705	-1.9080845	4.2158517E-4	0.004128387	0.2129																				32	Respiratory electron transport	100	-1.9453	0.0027	0	NDUFC2|SURF1|NDUFC1|UQCR11|UQCRQ|UQCR10|NDUFA13|NDUFA11|COX7B|NDUFA12|NDUFA10|MT-CYB|NDUFB9|COX7C|COX8A|NDUFB8|ETFA|NDUFB7|ETFB|NDUFB6|NDUFB5|NDUFB4|COX5B|NDUFB3|COX5A|NDUFB2|NDUFB1|COX6C|NDUFA9|TACO1|NDUFA8|NDUFA7|COX6A1|NDUFA6|NDUFA5|NDUFA3|NDUFA2|COX6B1|NDUFA1|COX16|COX18|COX11|COX14|COQ10B|COQ10A|ETFDH|CYCS|COX20|TIMMDC1|MT-ND6|MT-ND4|MT-ND5|MT-ND2|MT-ND3|MT-ND1|NDUFAF6|NDUFAF7|NDUFAF4|NDUFAF…
NEGATIVE REGULATORS OF RIG-I MDA5 SIGNALING%REACTOME%R-HSA-936440.4	34	-0.6061433	-1.8989971	6.1945076E-4	0.00471396	0.2419																				28	ER-Phagosome pathway	83	-1.9469	0.0027	0	PSMC5|PSMC6|PSMC3|PSMC4|PSMC1|PSMC2|IKBKB|PSMD8|PSMD9|PSMD6|PSMD7|TLR1|PSMD4|HLA-B|PSMD5|HLA-C|PSMD2|HLA-F|PSMD3|HLA-G|PSMD1|HLA-E|IKBKG|TLR2|CHUK|PSMA5|PSMA6|PSMA3|PSMA4|PSMA1|PSMA2|PSME3|PSME4|PSME1|HLA-A|PSME2|UBA52|B2M|PSMD10|PSMB11|PSMD12|PSMD11|PSMD14|LY96|PSMD13|SEC22B|PSMA7|PSMB10|PSMA8|CD14|PSMB6|TLR4|PSMB7|PSMB4|PSMB5|UBB|PSMB2|PSMB3|UBC|PSMB1|TAP2|PSMF1|TAP1|RPS27A|SHFM1|SNAP23|PSMB8|S…
DEGRADATION OF DVL%REACTOME%R-HSA-4641258.2	53	-0.5554888	-1.8943652	0.0	0.0050002495	0.258																				28	Degradation of AXIN	55	-1.9504	0.0026	0	PSMC5|PSMC6|PSMC3|RNF146|PSMC4|PSMC1|PSMC2|TNKS|PSMD8|PSMD9|PSMD6|PSMD7|PSMD4|PSMD5|PSMD2|PSMD3|PSMD1|TNKS2|PSMA5|PSMA6|PSMA3|PSMA4|PSMA1|PSMA2|AXIN2|PSME3|PSME4|PSME1|PSME2|UBA52|PSMD10|PSMB11|PSMD12|PSMD11|PSMD14|PSMD13|SMURF2|PSMA7|PSMB10|PSMA8|PSMB6|PSMB7|PSMB4|PSMB5|UBB|PSMB2|PSMB3|UBC|PSMB1|PSMF1|RPS27A|SHFM1|PSMB8|PSMB9|AXIN1
HEDGEHOG LIGAND BIOGENESIS%REACTOME%R-HSA-5358346.1	55	-0.5508369	-1.8924195	2.0833334E-4	0.005087178	0.2647																				28	Vif-mediated degradation of APOBEC3G	53	-1.9627	0.0022	0.0004	PSMC5|PSMC6|PSMC3|PSMC4|PSMC1|PSMC2|PSMD8|PSMD9|PSMD6|PSMD7|PSMD4|PSMD5|PSMD2|PSMD3|PSMD1|PSMA5|PSMA6|PSMA3|PSMA4|RBX1|PSMA1|PSMA2|PSME3|CUL5|PSME4|PSME1|PSME2|UBA52|PSMD10|PSMB11|PSMD12|PSMD11|PSMD14|PSMD13|PSMA7|PSMB10|PSMA8|PSMB6|PSMB7|PSMB4|PSMB5|UBB|PSMB2|PSMB3|UBC|PSMB1|PSMF1|RPS27A|SHFM1|PSMB8|PSMB9|TCEB2|TCEB1
ACTIVATION OF ATR IN RESPONSE TO REPLICATION STRESS%REACTOME DATABASE ID RELEASE 73%176187	33	-0.6115826	-1.8917587	8.444163E-4	0.0050714915	0.2672																				35	DNA strand elongation	32	-1.968	0.002	0.0002	MCM4|MCM5|MCM6|PCNA|MCM2|POLD3|POLD4|CDC45|GINS1|GINS2|GINS3|PRIM2|GINS4|PRIM1|LIG1|POLA1|FEN1|POLA2|RPA3|RPA1|RPA2|POLD1|POLD2|RFC5|RFC3|RFC4|RFC1|RFC2|DNA2|MCM7|MCM8|MCM3
HOST INTERACTIONS OF HIV FACTORS%REACTOME%R-HSA-162909.1	118	-0.48278323	-1.8810475	0.0	0.005911969	0.3096																				28	Vpu mediated degradation of CD4	52	-1.9736	0.0019	0	PSMC5|PSMC6|PSMC3|PSMC4|PSMC1|PSMC2|PSMD8|PSMD9|PSMD6|PSMD7|PSMD4|PSMD5|PSMD2|PSMD3|PSMD1|BTRC|SKP1|PSMA5|PSMA6|PSMA3|PSMA4|PSMA1|PSMA2|PSME3|PSME4|PSME1|PSME2|UBA52|PSMD10|PSMB11|PSMD12|PSMD11|PSMD14|PSMD13|PSMA7|PSMB10|PSMA8|PSMB6|PSMB7|PSMB4|PSMB5|UBB|PSMB2|PSMB3|UBC|PSMB1|PSMF1|RPS27A|SHFM1|PSMB8|CD4|PSMB9
ACTIVATION OF NF-KAPPAB IN B CELLS%REACTOME%R-HSA-1169091.1	64	-0.53061754	-1.8795735	4.2025634E-4	0.005955748	0.3152																				28	Regulation of Apoptosis	53	-1.9736	0.0019	0.0002	PSMC5|PSMC6|PSMC3|PSMC4|PSMC1|PSMC2|PSMD8|PSMD9|PSMD6|PSMD7|PSMD4|PSMD5|PSMD2|PSMD3|PSMD1|PSMA5|PSMA6|PSMA3|PSMA4|PSMA1|PSMA2|PSME3|PSME4|PSME1|PSME2|UBA52|OMA1|PSMD10|PSMB11|PSMD12|PSMD11|PSMD14|PSMD13|OPA1|PSMA7|PSMB10|PSMA8|PSMB6|PSMB7|PSMB4|PSMB5|UBB|PSMB2|PSMB3|ARHGAP10|UBC|PSMB1|PSMF1|RPS27A|SHFM1|PSMB8|PSMB9|PAK2
REGULATION OF ORNITHINE DECARBOXYLASE (ODC)%REACTOME DATABASE ID RELEASE 73%350562	46	-0.56511295	-1.8778424	0.0	0.006044683	0.3222																				30	Downstream signaling events of B Cell Receptor (BCR)	79	-1.98	0.0018	0	NFKBIA|PSMC5|PSMC6|PSMC3|PSMC4|PSMC1|PSMC2|REL|NFKBIE|NFKBIB|IKBKB|PSMD8|PSMD9|PSMD6|PSMD7|PSMD4|PSMD5|PSMD2|PSMD3|PSMD1|IKBKG|BTRC|MAP3K7|SKP1|CHUK|FBXW11|NFATC2|PRKCB|RASGRP1|PSMA5|PSMA6|RASGRP3|PSMA3|PSMA4|PSMA1|PSMA2|PSME3|PSME4|PSME1|PSME2|UBA52|CARD11|PSMD10|PPIA|PPP3R1|PSMB11|PSMD12|PSMD11|PSMD14|PSMD13|CUL1|BCL10|MALT1|RELA|PPP3CB|PSMA7|PSMB10|PSMA8|PSMB6|PSMB7|PSMB4|PSMB5|UBB|PSMB2|PSMB3…
STABILIZATION OF P53%REACTOME DATABASE ID RELEASE 73%69541	52	-0.54985493	-1.8734887	0.0	0.0063787336	0.3414																				28	Ubiquitin-dependent degradation of Cyclin D	52	-1.9839	0.0017	0	PSMC5|PSMC6|PSMC3|PSMC4|PSMC1|PSMC2|PSMD8|PSMD9|PSMD6|PSMD7|PSMD4|PSMD5|PSMD2|PSMD3|PSMD1|PSMA5|PSMA6|PSMA3|PSMA4|PSMA1|PSMA2|PSME3|PSME4|PSME1|PSME2|UBA52|PSMD10|PSMB11|PSMD12|PSMD11|PSMD14|PSMD13|PSMA7|PSMB10|PSMA8|PSMB6|PSMB7|PSMB4|PSMB5|UBB|PSMB2|PSMB3|UBC|PSMB1|PSMF1|RPS27A|GSK3B|SHFM1|PSMB8|PSMB9|CDK4|CCND1
FCGR ACTIVATION%REACTOME DATABASE ID RELEASE 73%2029481	16	-0.71928656	-1.8733915	0.0022231205	0.0063113305	0.3417																				41	ISG15 antiviral mechanism	70	-1.9843	0.0017	0	EIF4A2|EIF4A1|UBA7|POM121|NUP205|IFIT1|UBE2L6|JAK1|UBE2N|AAAS|NUP160|NUP85|TPR|NUP88|NUP155|NUP153|PIN1|UBA52|EIF4A3|ARIH1|NUP62|NDC1|SEC13|FLNB|NUP133|UBB|UBC|KPNA7|KPNA4|KPNA5|RPS27A|KPNA3|EIF2AK2|NUP50|NUP54|EIF4G3|EIF4G2|EIF4E3|KPNA2|PPM1B|STAT1|NUP43|HERC5|RAE1|RANBP2|USP41|KPNB1|EIF4E2|UBE2E1|USP18|NUP35|NUPL2|NUP37|DDX58|EIF4E|NUP107|NUP188|MX2|MX1|PLCG1|IRF3|TRIM25|NUP214|EIF4G1|NUP210|IS…
RESPIRATORY ELECTRON TRANSPORT, ATP SYNTHESIS BY CHEMIOSMOTIC COUPLING, AND HEAT PRODUCTION BY UNCOUPLING PROTEINS.%REACTOME%R-HSA-163200.1	92	-0.4938495	-1.8508608	0.0	0.008468142	0.4306																				28	AUF1 (hnRNP D0) binds and destabilizes mRNA	53	-1.9894	0.0016	0	PSMC5|PSMC6|PSMC3|PSMC4|PSMC1|PSMC2|PSMD8|PSMD9|PSMD6|PSMD7|PSMD4|PSMD5|PSMD2|PSMD3|PSMD1|PSMA5|PSMA6|PSMA3|PSMA4|PSMA1|PSMA2|PSME3|PSME4|PSME1|PSME2|UBA52|PSMD10|PSMB11|PSMD12|PSMD11|PSMD14|PSMD13|PSMA7|PSMB10|PSMA8|PSMB6|PSMB7|PSMB4|PSMB5|UBB|PSMB2|PSMB3|UBC|PSMB1|PSMF1|RPS27A|SHFM1|PSMB8|PSMB9|HSPA8|EIF4G1|HSPB1|PABPC1
P53-DEPENDENT G1 DNA DAMAGE RESPONSE%REACTOME DATABASE ID RELEASE 73%69563	59	-0.532549	-1.849404	6.361323E-4	0.008523918	0.4368																				28	Autodegradation of the E3 ubiquitin ligase COP1	52	-1.9895	0.0016	0	PSMC5|PSMC6|RFWD2|PSMC3|PSMC4|PSMC1|PSMC2|PSMD8|PSMD9|PSMD6|PSMD7|PSMD4|PSMD5|PSMD2|PSMD3|PSMD1|PSMA5|PSMA6|PSMA3|PSMA4|PSMA1|PSMA2|PSME3|PSME4|PSME1|PSME2|UBA52|PSMD10|PSMB11|PSMD12|PSMD11|PSMD14|PSMD13|PSMA7|TP53|PSMB10|PSMA8|PSMB6|PSMB7|PSMB4|PSMB5|UBB|PSMB2|PSMB3|ATM|UBC|PSMB1|PSMF1|RPS27A|SHFM1|PSMB8|PSMB9
P53-DEPENDENT G1 S DNA DAMAGE CHECKPOINT%REACTOME%R-HSA-69580.3	59	-0.532549	-1.8492683	2.059308E-4	0.008433574	0.4374																				28	Regulation of activated PAK-2p34 by proteasome mediated degradation	50	-1.9902	0.0017	0	PSMC5|PSMC6|PSMC3|PSMC4|PSMC1|PSMC2|PSMD8|PSMD9|PSMD6|PSMD7|PSMD4|PSMD5|PSMD2|PSMD3|PSMD1|PSMA5|PSMA6|PSMA3|PSMA4|PSMA1|PSMA2|PSME3|PSME4|PSME1|PSME2|UBA52|PSMD10|PSMB11|PSMD12|PSMD11|PSMD14|PSMD13|PSMA7|PSMB10|PSMA8|PSMB6|PSMB7|PSMB4|PSMB5|UBB|PSMB2|PSMB3|UBC|PSMB1|PSMF1|RPS27A|SHFM1|PSMB8|PSMB9|PAK2
NIK-->NONCANONICAL NF-KB SIGNALING%REACTOME%R-HSA-5676590.1	56	-0.5322346	-1.8441622	2.104377E-4	0.008883831	0.4579																				28	SCF-beta-TrCP mediated degradation of Emi1	55	-2.005	0.0013	0	PSMC5|PSMC6|PSMC3|PSMC4|PSMC1|PSMC2|PSMD8|PSMD9|PSMD6|PSMD7|PSMD4|PSMD5|PSMD2|PSMD3|PSMD1|BTRC|SKP1|PSMA5|PSMA6|PSMA3|PSMA4|PSMA1|PSMA2|PSME3|PSME4|PSME1|PSME2|UBA52|PSMD10|PSMB11|PSMD12|PSMD11|PSMD14|PSMD13|CUL1|PSMA7|PSMB10|PSMA8|PSMB6|PSMB7|PSMB4|PSMB5|UBB|PSMB2|PSMB3|UBC|PSMB1|PSMF1|RPS27A|SHFM1|PSMB8|PSMB9|CDC20|FZR1|FBXO5
TERMINATION OF TRANSLESION DNA SYNTHESIS%REACTOME DATABASE ID RELEASE 73%5656169	30	-0.60579616	-1.8422672	6.059382E-4	0.008983349	0.466																				36	Transcription of E2F targets under negative control by p107 (RBL1) and p130 (RBL2) in complex with HDAC1	16	-2.0055	0.0013	0	LIN37|CCNA2|LIN9|E2F1|LIN52|HDAC1|E2F4|E2F5|CDK1|RBL2|MYBL2|TFDP1|RBBP4|RBL1|TFDP2|LIN54
ANTIGEN PROCESSING-CROSS PRESENTATION%REACTOME%R-HSA-1236975.1	94	-0.48619086	-1.8358183	0.0	0.009704351	0.4959																				28	p53-Independent G1 S DNA damage checkpoint	52	-2.0057	0.0014	0	PSMC5|PSMC6|PSMC3|PSMC4|PSMC1|PSMC2|PSMD8|PSMD9|PSMD6|PSMD7|PSMD4|PSMD5|PSMD2|PSMD3|PSMD1|PSMA5|PSMA6|PSMA3|PSMA4|PSMA1|PSMA2|PSME3|PSME4|PSME1|PSME2|UBA52|PSMD10|PSMB11|PSMD12|PSMD11|PSMD14|PSMD13|CDC25A|PSMA7|PSMB10|PSMA8|PSMB6|PSMB7|PSMB4|CHEK2|PSMB5|UBB|PSMB2|PSMB3|UBC|PSMB1|PSMF1|RPS27A|SHFM1|PSMB8|PSMB9|CHEK1
DOWNSTREAM TCR SIGNALING%REACTOME%R-HSA-202424.4	91	-0.4907563	-1.8349365	0.0	0.009714435	0.5003																				28	p53-Independent DNA Damage Response	52	-2.0174	0.0011	0	PSMC5|PSMC6|PSMC3|PSMC4|PSMC1|PSMC2|PSMD8|PSMD9|PSMD6|PSMD7|PSMD4|PSMD5|PSMD2|PSMD3|PSMD1|PSMA5|PSMA6|PSMA3|PSMA4|PSMA1|PSMA2|PSME3|PSME4|PSME1|PSME2|UBA52|PSMD10|PSMB11|PSMD12|PSMD11|PSMD14|PSMD13|CDC25A|PSMA7|PSMB10|PSMA8|PSMB6|PSMB7|PSMB4|CHEK2|PSMB5|UBB|PSMB2|PSMB3|UBC|PSMB1|PSMF1|RPS27A|SHFM1|PSMB8|PSMB9|CHEK1
PCP CE PATHWAY%REACTOME DATABASE ID RELEASE 73%4086400	74	-0.50425154	-1.8304329	0.0	0.010235308	0.5215																				28	Ubiquitin Mediated Degradation of Phosphorylated Cdc25A	52	-2.0221	0.0011	0	PSMC5|PSMC6|PSMC3|PSMC4|PSMC1|PSMC2|PSMD8|PSMD9|PSMD6|PSMD7|PSMD4|PSMD5|PSMD2|PSMD3|PSMD1|PSMA5|PSMA6|PSMA3|PSMA4|PSMA1|PSMA2|PSME3|PSME4|PSME1|PSME2|UBA52|PSMD10|PSMB11|PSMD12|PSMD11|PSMD14|PSMD13|CDC25A|PSMA7|PSMB10|PSMA8|PSMB6|PSMB7|PSMB4|CHEK2|PSMB5|UBB|PSMB2|PSMB3|UBC|PSMB1|PSMF1|RPS27A|SHFM1|PSMB8|PSMB9|CHEK1
CELLULAR RESPONSE TO HYPOXIA%REACTOME DATABASE ID RELEASE 73%1234174	65	-0.51327455	-1.8163048	8.309098E-4	0.0121299485	0.5885																				28	Autodegradation of Cdh1 by Cdh1:APC C	64	-2.0241	0.001	0	PSMC5|PSMC6|PSMC3|PSMC4|PSMC1|PSMC2|UBE2D1|PSMD8|PSMD9|PSMD6|PSMD7|PSMD4|PSMD5|PSMD2|PSMD3|PSMD1|PSMA5|PSMA6|PSMA3|PSMA4|PSMA1|PSMA2|PSME3|PSME1|PSME2|UBA52|PSMD10|PSMD12|PSMD11|PSMD14|PSMD13|PSMA7|PSMB10|PSMB6|PSMB7|PSMB4|PSMB5|UBB|PSMB2|PSMB3|UBC|PSMB1|PSMF1|RPS27A|SHFM1|PSMB8|PSMB9|ANAPC15|ANAPC16|ANAPC7|UBE2C|UBE2E1|ANAPC10|ANAPC11|FZR1|CDC23|UBE2S|CDC26|CDC16|CDC27|ANAPC4|ANAPC5|ANAPC1|ANAPC2
RESOLUTION OF AP SITES VIA THE MULTIPLE-NUCLEOTIDE PATCH REPLACEMENT PATHWAY%REACTOME DATABASE ID RELEASE 73%110373	25	-0.6220116	-1.8149718	0.0020483409	0.01221372	0.5956																				28	CDT1 association with the CDC6:ORC:origin complex	59	-2.032	0.0009	0	PSMC5|PSMC6|PSMC3|PSMC4|PSMC1|PSMC2|PSMD8|PSMD9|PSMD6|PSMD7|PSMD4|PSMD5|PSMD2|PSMD3|PSMD1|PSMA5|PSMA6|PSMA3|PSMA4|PSMA1|PSMA2|PSME3|PSME4|PSME1|PSME2|UBA52|PSMD10|PSMB11|PSMD12|PSMD11|PSMD14|PSMD13|PSMA7|PSMB10|PSMA8|PSMB6|PSMB7|PSMB4|PSMB5|UBB|PSMB2|PSMB3|UBC|MCM8|PSMB1|PSMF1|RPS27A|SHFM1|PSMB8|ORC5|PSMB9|ORC4|ORC6|ORC1|ORC3|ORC2|GMNN|CDT1|CDC6
ASYMMETRIC LOCALIZATION OF PCP PROTEINS%REACTOME%R-HSA-4608870.1	55	-0.530024	-1.8141142	8.2152395E-4	0.012201349	0.5988																				28	Defective CFTR causes cystic fibrosis	61	-2.037	0.0008	0	CFTR|PSMC5|PSMC6|PSMC3|PSMC4|PSMC1|VCP|PSMC2|SEL1L|PSMD8|PSMD9|PSMD6|PSMD7|PSMD4|PSMD5|PSMD2|PSMD3|PSMD1|PSMA5|ERLIN1|PSMA6|PSMA3|ERLIN2|PSMA4|PSMA1|PSMA2|PSME3|PSME4|RNF185|PSME1|PSME2|UBA52|PSMD10|PSMB11|PSMD12|PSMD11|PSMD14|PSMD13|PSMA7|PSMB10|PSMA8|PSMB6|PSMB7|PSMB4|PSMB5|UBB|PSMB2|PSMB3|UBC|PSMB1|PSMF1|RPS27A|SHFM1|PSMB8|PSMB9|DERL3|DERL1|DERL2|RNF5|ERLEC1|OS9
POLO-LIKE KINASE MEDIATED EVENTS%REACTOME%R-HSA-156711.2	12	-0.75560594	-1.8121864	0.002631579	0.0123839425	0.6085																				30	FCERI mediated NF-kB activation	87	-2.0402	0.0008	0	NFKBIA|PSMC5|PSMC6|PSMC3|PSMC4|PSMC1|PSMC2|UBE2D2|LYN|UBE2D1|IKBKB|IGKV5-2|TAB3|PSMD8|UBE2N|TAB2|PSMD9|PSMD6|IGKV2-28|TAB1|PSMD7|IGKV1-12|PSMD4|PDPK1|PSMD5|IGKV3D-20|PSMD2|CDC34|PSMD3|IGKV2D-28|PSMD1|TRAF6|IKBKG|IGKV4-1|BTRC|IGHE|MAP3K7|PRKCQ|SKP1|UBE2V1|CHUK|IGKV2D-30|FBXW11|RASGRP2|RASGRP1|PSMA5|RASGRP4|PSMA6|IGKV3-11|PSMA3|PSMA4|PSMA1|PSMA2|PSME3|PSME4|PSME1|PSME2|UBA52|CARD11|PSMD10|PSMB11|PS…
NEDDYLATION%REACTOME DATABASE ID RELEASE 73%8951664	191	-0.43379298	-1.807897	0.0	0.012971851	0.6282																				28	SCF(Skp2)-mediated degradation of p27 p21	60	-2.0498	0.0007	0	PSMC5|PSMC6|PSMC3|PSMC4|PSMC1|PSMC2|PSMD8|PSMD9|PSMD6|PSMD7|PSMD4|PSMD5|PSMD2|PSMD3|PSMD1|SKP1|PSMA5|PSMA6|PSMA3|PSMA4|PSMA1|PSMA2|PSME3|PSME1|PSME2|UBA52|PSMD10|PSMD12|PSMD11|PSMD14|PSMD13|CCNE2|CUL1|CCNE1|PSMA7|PSMB10|PSMB6|PSMB7|PSMB4|PSMB5|UBB|PSMB2|PSMB3|UBC|PSMB1|PSMF1|CDKN1A|RPS27A|CDKN1B|SHFM1|CKS1B|PSMB8|PSMB9|SKP2|PTK6|CDK4|CDK2|CCNA2|CCNA1|CCND1
DECTIN-1 MEDIATED NONCANONICAL NF-KB SIGNALING%REACTOME DATABASE ID RELEASE 73%5607761	57	-0.52458113	-1.8070574	2.0529666E-4	0.012966851	0.6315																				28	APC C:Cdc20 mediated degradation of Securin	68	-2.0569	0.0006	0	PSMC5|PSMC6|PSMC3|PSMC4|PSMC1|PSMC2|UBE2D1|PSMD8|PSMD9|PSMD6|PSMD7|PSMD4|PSMD5|PSMD2|PSMD3|PSMD1|PSMA5|PSMA6|PSMA3|PSMA4|PSMA1|PSMA2|PSME3|PSME4|PSME1|PSME2|UBA52|PSMD10|PSMB11|PSMD12|PSMD11|PSMD14|PSMD13|PSMA7|PSMB10|PSMA8|PSMB6|PSMB7|PSMB4|PSMB5|UBB|PSMB2|PSMB3|UBC|PSMB1|PSMF1|RPS27A|SHFM1|PSMB8|PSMB9|CDC20|ANAPC15|PTTG1|ANAPC16|ANAPC7|UBE2C|UBE2E1|ANAPC10|ANAPC11|CDC23|UBE2S|CDC26|CDC16|CDC27|…
COMPLEX I BIOGENESIS%REACTOME DATABASE ID RELEASE 73%6799198	48	-0.53823596	-1.8068382	4.1467967E-4	0.012858005	0.6325																				36	Transcription of E2F targets under negative control by DREAM complex	19	-2.0625	0.0005	0	LIN37|PCNA|LIN9|E2F1|LIN52|HDAC1|CDC6|E2F4|MYC|E2F5|CDC25A|RBL2|TFDP1|RBBP4|RBL1|TFDP2|MAX|TOP2A|LIN54
INTERCONVERSION OF NUCLEOTIDE DI- AND TRIPHOSPHATES%REACTOME%R-HSA-499943.6	23	-0.6338216	-1.8040221	0.0014144272	0.013182119	0.6451																					RUNX1 regulates transcription of genes involved in differentiation of HSCs	130	-2.0631	0.0005	0	RUNX1|PSMC5|PSMC6|PSMC3|PSMC4|PSMC1|TP73|PSMC2|PSMD8|PSMD9|PSMD6|PSMD7|PSMD4|YAP1|PSMD5|PSMD2|PSMD3|PSMD1|PSMA5|ITCH|PSMA6|PSMA3|PSMA4|PSMA1|PSMA2|PSME3|PSME4|PSME1|PSME2|UBA52|PSMD10|PSMB11|PSMD12|PSMD11|PSMD14|PSMD13|PSMA7|PSMB10|PSMA8|PSMB6|PSMB7|PSMB4|PSMB5|UBB|PSMB2|PSMB3|UBC|PSMB1|PSMF1|RPS27A|SHFM1|PSMB8|PSMB9|ABL1|TCF3|LDB1|MYB|KMT2A|CCNH|HIST1H2AE|HIST1H2AD|HIST3H2BB|HIST1H2AC|HIST1H2AB|…
PCNA-DEPENDENT LONG PATCH BASE EXCISION REPAIR%REACTOME%R-HSA-5651801.1	21	-0.64737105	-1.8028787	0.002902156	0.013222137	0.6505																				28	APC C:Cdh1 mediated degradation of Cdc20 and other APC C:Cdh1 targeted proteins in late mitosis early G1	74	-2.0843	0.0004	0	PSMC5|PSMC6|PSMC3|PSMC4|PSMC1|PSMC2|UBE2D1|PSMD8|PSMD9|PSMD6|PSMD7|PSMD4|PSMD5|PSMD2|PSMD3|PSMD1|PSMA5|PSMA6|PSMA3|PSMA4|PSMA1|PSMA2|PSME3|PSME4|PSME1|PSME2|UBA52|PSMD10|PSMB11|PSMD12|PSMD11|PSMD14|PSMD13|PSMA7|PSMB10|PSMA8|PSMB6|PSMB7|PSMB4|PSMB5|UBB|PSMB2|PSMB3|UBC|RB1|PSMB1|PSMF1|RPS27A|SHFM1|PSMB8|PSMB9|CDC20|SKP2|ANAPC15|PTTG1|ANAPC16|ANAPC7|PLK1|UBE2C|UBE2E1|ANAPC10|ANAPC11|FZR1|CDC23|UBE2S…
RNA POLYMERASE I PROMOTER ESCAPE%REACTOME%R-HSA-73772.5	27	-0.60703576	-1.8016022	0.002451982	0.013299095	0.657																				30	B Cell Activation	115	-2.1007	0.0003	0	NFKBIA|VAV1|PSMC5|PSMC6|PSMC3|PSMC4|PSMC1|PSMC2|REL|NFKBIE|NFKBIB|LYN|IKBKB|IGKV5-2|PSMD8|PSMD9|PSMD6|IGKV2-28|PSMD7|IGKV1-12|PSMD4|PSMD5|IGKV3D-20|PSMD2|PSMD3|IGKV2D-28|PSMD1|IKBKG|IGKV4-1|BTRC|MAP3K7|SKP1|CHUK|IGKV2D-30|FBXW11|PRKCB|RASGRP1|PSMA5|PSMA6|IGKV3-11|PSMA3|PSMA4|PSMA1|PLCG2|PSMA2|PSME3|PSME4|PSME1|PSME2|UBA52|CARD11|PSMD10|PPP3R1|PSMB11|PSMD12|PSMD11|PSMD14|PSMD13|CUL1|BCL10|MALT1|RE…
TRANSLESION SYNTHESIS BY POLH%REACTOME DATABASE ID RELEASE 73%110320	18	-0.66772413	-1.7974148	0.004540764	0.013838731	0.6756																					DNA Replication Pre-Initiation	85	-2.1073	0.0003	0	PSMC5|PSMC6|PSMC3|PSMC4|PSMC1|PSMC2|PSMD8|PSMD9|PSMD6|PSMD7|PSMD4|PSMD5|PSMD2|PSMD3|PSMD1|CDC7|PSMA5|PSMA6|PSMA3|PSMA4|RPA3|PSMA1|PSMA2|PSME3|RPA1|PSME4|RPA2|PSME1|PSME2|UBA52|PSMD10|PSMB11|PSMD12|PSMD11|PSMD14|PSMD13|PSMA7|PSMB10|PSMA8|PSMB6|PSMB7|PSMB4|PSMB5|UBB|PSMB2|PSMB3|MCM7|UBC|MCM8|PSMB1|MCM3|PSMF1|MCM4|RPS27A|MCM5|SHFM1|MCM6|MCM2|PSMB8|ORC5|PSMB9|ORC4|ORC6|ORC1|ORC3|ORC2|GMNN|E2F1|CDT1|M…
REGULATION OF MRNA STABILITY BY PROTEINS THAT BIND AU-RICH ELEMENTS%REACTOME%R-HSA-450531.4	80	-0.48862645	-1.7950816	0.0	0.014108784	0.6868																					Antimicrobial peptides	94	-2.1081	0.0003	0	DEFB106B|DEFB119|DEFB118|DCD|DEFB116|SLC11A1|DEFB115|RNASE6|DEFB114|DEFB113|DEFB112|RNASE3|DEFB110|DEFB106A|PRSS2|TLR1|BPI|PRTN3|DEFB4A|S100A9|DEFB4B|S100A8|TLR2|S100A7|LTF|DEFB103A|DEFB103B|REG3A|DEFB129|DEFB128|DEFB127|DEFB126|DEFB125|ITLN1|DEFB124|DEFB123|REG3G|DEFB121|DEFB107A|DEFB107B|EPPIN-WFDC6|ELANE|ART1|PDZD11|RNASE8|RNASE7|PI3|DEFA1B|CHGA|DEFB104B|DEFB104A|DEFA6|DEFA4|DEFA5|PLA2G2A|DEFB…
ABC-FAMILY PROTEINS MEDIATED TRANSPORT%REACTOME%R-HSA-382556.4	86	-0.47973058	-1.7869072	0.0	0.015486229	0.7248																				28	Regulation of APC C activators between G1 S and early anaphase	81	-2.1278	0.0002	0	PSMC5|PSMC6|PSMC3|PSMC4|PSMC1|PSMC2|UBE2D1|PSMD8|PSMD9|PSMD6|PSMD7|PSMD4|PSMD5|PSMD2|PSMD3|PSMD1|BTRC|SKP1|PSMA5|PSMA6|PSMA3|PSMA4|PSMA1|PSMA2|PSME3|PSME4|PSME1|PSME2|UBA52|PSMD10|PSMB11|PSMD12|PSMD11|PSMD14|PSMD13|CUL1|CDK1|PSMA7|PSMB10|PSMA8|PSMB6|PSMB7|PSMB4|CCNB1|PSMB5|UBB|PSMB2|PSMB3|UBC|PSMB1|PSMF1|RPS27A|SHFM1|PSMB8|PSMB9|BUB1B|CDC20|BUB3|MAD2L1|ANAPC15|ANAPC16|ANAPC7|PLK1|UBE2C|CDK2|UBE2E…
POSTMITOTIC NUCLEAR PORE COMPLEX (NPC) REFORMATION%REACTOME%R-HSA-9615933.1	24	-0.62031525	-1.7841402	0.0030543678	0.015862975	0.7364																				28	Assembly of the pre-replicative complex	68	-2.132	0.0002	0	PSMC5|PSMC6|PSMC3|PSMC4|PSMC1|PSMC2|PSMD8|PSMD9|PSMD6|PSMD7|PSMD4|PSMD5|PSMD2|PSMD3|PSMD1|PSMA5|PSMA6|PSMA3|PSMA4|PSMA1|PSMA2|PSME3|PSME4|PSME1|PSME2|UBA52|PSMD10|PSMB11|PSMD12|PSMD11|PSMD14|PSMD13|PSMA7|PSMB10|PSMA8|PSMB6|PSMB7|PSMB4|PSMB5|UBB|PSMB2|PSMB3|MCM7|UBC|MCM8|PSMB1|MCM3|PSMF1|MCM4|RPS27A|MCM5|SHFM1|MCM6|MCM2|PSMB8|ORC5|PSMB9|ORC4|ORC6|ORC1|ORC3|ORC2|GMNN|E2F1|CDT1|E2F2|CDC6|E2F3
TRANSLESION SYNTHESIS BY Y FAMILY DNA POLYMERASES BYPASSES LESIONS ON DNA TEMPLATE%REACTOME%R-HSA-110313.1	36	-0.5691021	-1.7824966	0.0022633744	0.015986148	0.7424																				28	CDK-mediated phosphorylation and removal of Cdc6	73	-2.1344	0.0001	0	PSMC5|PSMC6|PSMC3|PSMC4|PSMC1|PSMC2|UBE2D1|PSMD8|PSMD9|PSMD6|PSMD7|PSMD4|PSMD5|PSMD2|PSMD3|PSMD1|PSMA5|PSMA6|PSMA3|PSMA4|PSMA1|PSMA2|PSME3|PSME4|PSME1|PSME2|UBA52|PSMD10|PSMB11|PSMD12|PSMD11|PSMD14|PSMD13|CCNE2|CCNE1|PSMA7|PSMB10|PSMA8|PSMB6|PSMB7|PSMB4|PSMB5|UBB|PSMB2|PSMB3|UBC|PSMB1|PSMF1|RPS27A|SHFM1|PSMB8|PSMB9|CDC6|ANAPC15|ANAPC16|ANAPC7|UBE2C|CDK2|UBE2E1|ANAPC10|ANAPC11|FZR1|CDC23|UBE2S|CDC…
DISORDERS OF TRANSMEMBRANE TRANSPORTERS%REACTOME DATABASE ID RELEASE 73%5619115	121	-0.45281288	-1.7772373	0.0	0.016812203	0.7629																				28	APC:Cdc20 mediated degradation of cell cycle proteins prior to satisfation of the cell cycle checkpoint	74	-2.1358	0.0002	0	PSMC5|PSMC6|PSMC3|PSMC4|PSMC1|PSMC2|UBE2D1|PSMD8|PSMD9|PSMD6|PSMD7|PSMD4|PSMD5|PSMD2|PSMD3|NEK2|PSMD1|PSMA5|PSMA6|PSMA3|PSMA4|PSMA1|PSMA2|PSME3|PSME4|PSME1|PSME2|UBA52|PSMD10|PSMB11|PSMD12|PSMD11|PSMD14|PSMD13|CDK1|PSMA7|PSMB10|PSMA8|PSMB6|PSMB7|PSMB4|PSMB5|UBB|PSMB2|PSMB3|UBC|PSMB1|PSMF1|RPS27A|SHFM1|PSMB8|PSMB9|BUB1B|CDC20|BUB3|MAD2L1|ANAPC15|ANAPC16|ANAPC7|UBE2C|UBE2E1|ANAPC10|ANAPC11|CDC23|UB…
NS1 MEDIATED EFFECTS ON HOST PATHWAYS%REACTOME DATABASE ID RELEASE 73%168276	35	-0.56792873	-1.7767538	0.0016280017	0.01674069	0.7651																				28	Cdc20:Phospho-APC C mediated degradation of Cyclin A	73	-2.1462	0.0001	0	PSMC5|PSMC6|PSMC3|PSMC4|PSMC1|PSMC2|UBE2D1|PSMD8|PSMD9|PSMD6|PSMD7|PSMD4|PSMD5|PSMD2|PSMD3|PSMD1|PSMA5|PSMA6|PSMA3|PSMA4|PSMA1|PSMA2|PSME3|PSME4|PSME1|PSME2|UBA52|PSMD10|PSMB11|PSMD12|PSMD11|PSMD14|PSMD13|CDK1|PSMA7|PSMB10|PSMA8|PSMB6|PSMB7|PSMB4|PSMB5|UBB|PSMB2|PSMB3|UBC|PSMB1|PSMF1|RPS27A|SHFM1|PSMB8|PSMB9|BUB1B|CDC20|BUB3|MAD2L1|ANAPC15|ANAPC16|ANAPC7|UBE2C|UBE2E1|ANAPC10|ANAPC11|CDC23|UBE2S|C…
LAGGING STRAND SYNTHESIS%REACTOME%R-HSA-69186.2	20	-0.64482224	-1.7757515	0.004149378	0.016777033	0.7688																				39	G2 M Checkpoints	168	-2.1468	0.0001	0	PSMC5|PSMC6|PSMC3|PSMC4|PSMC1|PSMC2|BRCA1|SUMO1|PSMD8|UBE2N|UBE2V2|PSMD9|PSMD6|PSMD7|PSMD4|PSMD5|PSMD2|PSMD3|PSMD1|MRE11A|PSMA5|PSMA6|PSMA3|PSMA4|PSMA1|PSMA2|RAD1|PSME3|PSME4|PSME1|RMI2|PSME2|UBA52|PSMD10|PSMB11|BABAM1|CLSPN|RMI1|PSMD12|UIMC1|PSMD11|WHSC1|PSMD14|RNF168|PSMD13|CDC25A|RNF8|BRCC3|CDK1|TP53BP1|PSMA7|PSMB10|PSMA8|RAD9B|PSMB6|PSMB7|PSMB4|CCNB1|CHEK2|PSMB5|BRE|UBB|HIST3H3|PSMB2|RAD9A|FA…
EXTENSION OF TELOMERES%REACTOME%R-HSA-180786.2	44	-0.53976923	-1.7732013	0.0016945562	0.017184496	0.7805																				28	Activation of APC C and APC C:Cdc20 mediated degradation of mitotic proteins	77	-2.1657	0.0001	0	PSMC5|PSMC6|PSMC3|PSMC4|PSMC1|PSMC2|UBE2D1|PSMD8|PSMD9|PSMD6|PSMD7|PSMD4|PSMD5|PSMD2|PSMD3|NEK2|PSMD1|PSMA5|PSMA6|PSMA3|PSMA4|PSMA1|PSMA2|PSME3|PSME4|PSME1|PSME2|UBA52|PSMD10|PSMB11|PSMD12|PSMD11|PSMD14|PSMD13|CDK1|PSMA7|PSMB10|PSMA8|PSMB6|PSMB7|PSMB4|CCNB1|PSMB5|UBB|PSMB2|PSMB3|UBC|PSMB1|PSMF1|RPS27A|SHFM1|PSMB8|PSMB9|BUB1B|CDC20|BUB3|MAD2L1|ANAPC15|PTTG1|ANAPC16|ANAPC7|PLK1|UBE2C|UBE2E1|ANAPC10…
ANTIGEN PRESENTATION: FOLDING, ASSEMBLY AND PEPTIDE LOADING OF CLASS I MHC%REACTOME DATABASE ID RELEASE 73%983170	24	-0.61772066	-1.7628721	0.0037546933	0.019156717	0.8157																				28	APC C:Cdc20 mediated degradation of mitotic proteins	76	-2.1658	0.0001	0	PSMC5|PSMC6|PSMC3|PSMC4|PSMC1|PSMC2|UBE2D1|PSMD8|PSMD9|PSMD6|PSMD7|PSMD4|PSMD5|PSMD2|PSMD3|NEK2|PSMD1|PSMA5|PSMA6|PSMA3|PSMA4|PSMA1|PSMA2|PSME3|PSME4|PSME1|PSME2|UBA52|PSMD10|PSMB11|PSMD12|PSMD11|PSMD14|PSMD13|CDK1|PSMA7|PSMB10|PSMA8|PSMB6|PSMB7|PSMB4|CCNB1|PSMB5|UBB|PSMB2|PSMB3|UBC|PSMB1|PSMF1|RPS27A|SHFM1|PSMB8|PSMB9|BUB1B|CDC20|BUB3|MAD2L1|ANAPC15|PTTG1|ANAPC16|ANAPC7|UBE2C|UBE2E1|ANAPC10|ANAP…
SEPARATION OF SISTER CHROMATIDS%REACTOME DATABASE ID RELEASE 73%2467813	146	-0.43538162	-1.7570245	0.0	0.020280303	0.8369																					G1 S-Specific Transcription	28	-2.177	0.0001	0	LIN37|TK1|PCNA|LIN9|E2F6|ORC1|E2F1|CDT1|CDC6|CDC45|E2F4|DHFR|E2F5|RBL2|TFDP1|RBL1|POLA1|TFDP2|LIN54|CCNA1|RRM2|LIN52|HDAC1|TYMS|CDK1|CCNE1|RBBP4|FBXO5
TELOMERE MAINTENANCE%REACTOME%R-HSA-157579.4	57	-0.507913	-1.7563989	0.001443299	0.020251624	0.8392																				31	Cyclin A:Cdk2-associated events at S phase entry	85	-2.1907	0.0001	0	LIN37|CCNH|PSMC5|LIN9|PSMC6|PSMC3|PSMC4|PSMC1|PSMC2|PSMD8|WEE1|PSMD9|PSMD6|PSMD7|PSMD4|PSMD5|PSMD2|PSMD3|PSMD1|SKP1|PSMA5|PSMA6|PSMA3|PSMA4|PSMA1|PSMA2|PSME3|PSME1|PSME2|UBA52|PSMD10|PSMD12|PSMD11|PSMD14|PSMD13|CCNE2|CDC25A|CUL1|CCNE1|PSMA7|CDK7|PSMB10|PSMB6|PSMB7|PSMB4|MNAT1|PSMB5|UBB|PSMB2|PSMB3|UBC|RB1|PSMB1|PSMF1|CDKN1A|RPS27A|CDKN1B|SHFM1|CKS1B|PSMB8|PSMB9|E2F1|CDC25B|E2F4|E2F5|SKP2|PTK6|RBL…
RECOGNITION OF DNA DAMAGE BY PCNA-CONTAINING REPLICATION COMPLEX%REACTOME%R-HSA-110314.1	30	-0.5807074	-1.7548164	0.0045454544	0.020414874	0.844																				28	Regulation of mitotic cell cycle	88	-2.192	0.0001	0	PSMC5|PSMC6|PSMC3|PSMC4|PSMC1|PSMC2|UBE2D1|PSMD8|PSMD9|PSMD6|PSMD7|PSMD4|PSMD5|PSMD2|PSMD3|NEK2|PSMD1|BTRC|SKP1|PSMA5|PSMA6|PSMA3|CDC14A|PSMA4|PSMA1|PSMA2|PSME3|PSME4|PSME1|PSME2|UBA52|PSMD10|PSMB11|PSMD12|PSMD11|PSMD14|PSMD13|CUL1|CDK1|PSMA7|PSMB10|PSMA8|PSMB6|PSMB7|PSMB4|CCNB1|PSMB5|UBB|PSMB2|PSMB3|UBC|RB1|PSMB1|PSMF1|RPS27A|SHFM1|PSMB8|PSMB9|BUB1B|CDC20|BUB3|MAD2L1|SKP2|ANAPC15|PTTG1|ANAPC16|A…
GAP-FILLING DNA REPAIR SYNTHESIS AND LIGATION IN GG-NER%REACTOME DATABASE ID RELEASE 73%5696397	25	-0.60190904	-1.7531966	0.005120852	0.020601086	0.8499																				41	Antiviral mechanism by IFN-stimulated genes	78	-2.195	0.0001	0	EIF4A2|EIF4A1|UBA7|POM121|NUP205|IFIT1|UBE2L6|JAK1|UBE2N|AAAS|NUP160|NUP85|TPR|NUP88|PDE12|NUP155|NUP153|PIN1|UBA52|EIF4A3|ARIH1|NUP62|NDC1|RNASEL|SEC13|FLNA|FLNB|NUP133|UBB|UBC|KPNA7|KPNA4|KPNA5|RPS27A|KPNA3|EIF2AK2|NUP50|NUP54|EIF4G3|EIF4G2|EIF4E3|OASL|KPNA2|PPM1B|STAT1|OAS1|OAS2|OAS3|NUP43|HERC5|RAE1|RANBP2|USP41|KPNB1|EIF4E2|UBE2E1|USP18|NUP35|NUPL2|NUP37|DDX58|EIF4E|NUP107|NUP188|MX2|MX1|PLC…
DNA DAMAGE BYPASS%REACTOME DATABASE ID RELEASE 73%73893	45	-0.52880174	-1.7451841	4.1050903E-4	0.022393156	0.8741																					Interferon Signaling	195	-2.1973	0.0001	0	EIF4A2|PML|EIF4A1|IFITM1|IFITM2|IFIT5|UBA7|IFI35|IFIT1|UBE2L6|IFI30|IFIT3|IFIT2|ICAM1|TRIM29|TRIM26|SUMO1|TRIM22|GBP6|GBP5|GBP7|RSAD2|HLA-B|PIAS1|HLA-C|SOCS1|HLA-F|HLA-G|HLA-E|TRIM17|PDE12|TRIM14|TRIM10|HLA-DQA2|HLA-DQA1|EGR1|HLA-DRB5|HLA-DRB4|BST2|HLA-DRB3|HLA-DRB1|IFNA5|CAMK2B|IFNA4|CAMK2D|IFNA7|IFNA6|IFNA1|UBA52|CAMK2A|IFNA2|IFNA8|IFNGR1|TRIM8|IFNGR2|TRIM6|TRIM5|TRIM2|TRIM3|ARIH1|HLA-DPA1|HLA-…
L13A-MEDIATED TRANSLATIONAL SILENCING OF CERULOPLASMIN EXPRESSION%REACTOME%R-HSA-156827.3	107	-0.4498711	-1.7354637	4.237288E-4	0.024680743	0.8982																				28	APC C-mediated degradation of cell cycle proteins	88	-2.2009	0.0001	0	PSMC5|PSMC6|PSMC3|PSMC4|PSMC1|PSMC2|UBE2D1|PSMD8|PSMD9|PSMD6|PSMD7|PSMD4|PSMD5|PSMD2|PSMD3|NEK2|PSMD1|BTRC|SKP1|PSMA5|PSMA6|PSMA3|CDC14A|PSMA4|PSMA1|PSMA2|PSME3|PSME4|PSME1|PSME2|UBA52|PSMD10|PSMB11|PSMD12|PSMD11|PSMD14|PSMD13|CUL1|CDK1|PSMA7|PSMB10|PSMA8|PSMB6|PSMB7|PSMB4|CCNB1|PSMB5|UBB|PSMB2|PSMB3|UBC|RB1|PSMB1|PSMF1|RPS27A|SHFM1|PSMB8|PSMB9|BUB1B|CDC20|BUB3|MAD2L1|SKP2|ANAPC15|PTTG1|ANAPC16|A…
RRNA PROCESSING IN THE NUCLEUS AND CYTOSOL%REACTOME DATABASE ID RELEASE 73%8868773	181	-0.41854665	-1.7323924	0.0	0.025302172	0.9058																				31	Cyclin E associated events during G1 S transition	83	-2.2018	0.0001	0	LIN37|CCNH|PSMC5|LIN9|PSMC6|PSMC3|PSMC4|PSMC1|PSMC2|PSMD8|WEE1|PSMD9|PSMD6|PSMD7|PSMD4|PSMD5|PSMD2|PSMD3|PSMD1|SKP1|PSMA5|PSMA6|PSMA3|PSMA4|PSMA1|PSMA2|PSME3|PSME1|PSME2|UBA52|PSMD10|PSMD12|PSMD11|PSMD14|PSMD13|CCNE2|CDC25A|CUL1|CCNE1|PSMA7|CDK7|PSMB10|PSMB6|PSMB7|PSMB4|MNAT1|PSMB5|UBB|PSMB2|PSMB3|UBC|RB1|PSMB1|PSMF1|CDKN1A|RPS27A|CDKN1B|SHFM1|CKS1B|PSMB8|PSMB9|E2F1|E2F4|E2F5|SKP2|PTK6|RBL2|TFDP1…
DEGRADATION OF GLI2 BY THE PROTEASOME%REACTOME DATABASE ID RELEASE 73%5610783	55	-0.5018612	-1.7294933	0.0018579686	0.025850696	0.9121																				28	Orc1 removal from chromatin	71	-2.2048	0.0001	0	PSMC5|PSMC6|PSMC3|PSMC4|PSMC1|PSMC2|PSMD8|PSMD9|PSMD6|PSMD7|PSMD4|PSMD5|PSMD2|PSMD3|PSMD1|SKP1|PSMA5|PSMA6|PSMA3|PSMA4|RBX1|PSMA1|PSMA2|PSME3|PSME4|PSME1|PSME2|UBA52|PSMD10|PSMB11|PSMD12|PSMD11|PSMD14|PSMD13|CUL1|PSMA7|PSMB10|PSMA8|PSMB6|PSMB7|PSMB4|PSMB5|UBB|PSMB2|PSMB3|MCM7|UBC|MCM8|PSMB1|MCM3|PSMF1|MCM4|RPS27A|MCM5|SHFM1|MCM6|MCM2|PSMB8|ORC5|PSMB9|ORC4|ORC6|ORC1|ORC3|ORC2|CDT1|CDC6|SKP2|CDK2|C…
BINDING AND UPTAKE OF LIGANDS BY SCAVENGER RECEPTORS%REACTOME DATABASE ID RELEASE 73%2173782	26	-0.58878875	-1.7288191	0.0072224517	0.025825923	0.9135																				28	Switching of origins to a post-replicative state	91	-2.2296	0	0	PSMC5|PSMC6|PSMC3|PSMC4|PSMC1|PSMC2|UBE2D1|PSMD8|PSMD9|PSMD6|PSMD7|PSMD4|PSMD5|PSMD2|PSMD3|PSMD1|SKP1|PSMA5|PSMA6|PSMA3|PSMA4|RBX1|PSMA1|PSMA2|PSME3|PSME4|PSME1|PSME2|UBA52|PSMD10|PSMB11|PSMD12|PSMD11|PSMD14|PSMD13|CCNE2|CUL1|CCNE1|PSMA7|PSMB10|PSMA8|PSMB6|PSMB7|PSMB4|PSMB5|UBB|PSMB2|PSMB3|MCM7|UBC|MCM8|PSMB1|MCM3|PSMF1|MCM4|RPS27A|MCM5|SHFM1|MCM6|MCM2|PSMB8|ORC5|PSMB9|ORC4|ORC6|ORC1|ORC3|ORC2|CD…
ACTIVATION OF THE PRE-REPLICATIVE COMPLEX%REACTOME%R-HSA-68962.3	29	-0.57175756	-1.728024	0.0051706308	0.025822915	0.9157																				32	Mitotic G1 phase and G1 S transition	148	-2.2381	0	0	PCNA|PSMC5|PSMC6|PSMC3|PSMC4|PSMC1|PSMC2|LYN|PSMD8|PSMD9|PSMD6|PSMD7|PSMD4|PSMD5|PSMD2|PSMD3|PSMD1|SKP1|PSMA5|PSMA6|PSMA3|PSMA4|PSMA1|PSMA2|PSME3|PSME1|PSME2|UBA52|PSMD10|PSMD12|PSMD11|PSMD14|PSMD13|CDC25A|CUL1|CDK1|PSMA7|PSMB10|PSMB6|PSMB7|PSMB4|CCNB1|PSMB5|CDKN2A|UBB|PSMB2|PSMB3|MCM7|UBC|RB1|MCM8|PSMB1|CDKN1C|MCM3|PSMF1|CDKN1A|MCM4|RPS27A|CDKN1B|TK1|MCM5|SHFM1|PPP2R2A|MCM6|CKS1B|MCM2|PSMB8|PPP2…
REGULATION OF RAS BY GAPS%REACTOME%R-HSA-5658442.1	60	-0.49185145	-1.7187002	0.0010360547	0.028216455	0.9343																				36	G0 and Early G1	27	-2.2759	0	0	LIN37|PCNA|LIN9|E2F1|CDC6|E2F4|E2F5|MYBL2|RBL2|TFDP1|RBL1|TFDP2|CDK2|LIN54|CCNA2|CCNA1|LIN52|HDAC1|MYC|CDC25A|CCNE2|CDK1|CCNE1|RBBP4|MAX|DYRK1A|TOP2A
GLI3 IS PROCESSED TO GLI3R BY THE PROTEASOME%REACTOME DATABASE ID RELEASE 73%5610785	55	-0.5018612	-1.7127244	0.002739726	0.029804002	0.9442																				40	DNA Replication	128	-2.2854	0	0	PCNA|PSMC5|PSMC6|PSMC3|PSMC4|PSMC1|PSMC2|POLD3|POLD4|PSMD8|PSMD9|PSMD6|PSMD7|PSMD4|PSMD5|PSMD2|PSMD3|LIG1|PSMD1|SKP1|PSMA5|PSMA6|PSMA3|PSMA4|PSMA1|PSMA2|PSME3|PSME4|PSME1|PSME2|UBA52|PSMD10|PSMB11|PSMD12|PSMD11|PSMD14|PSMD13|CUL1|PSMA7|PSMB10|PSMA8|PSMB6|PSMB7|PSMB4|PSMB5|UBB|PSMB2|PSMB3|MCM7|UBC|MCM8|PSMB1|MCM3|PSMF1|MCM4|RPS27A|MCM5|SHFM1|MCM6|MCM2|PSMB8|ORC5|PSMB9|ORC4|ORC6|ORC1|ORC3|E2F1|ORC2…
DEGRADATION OF GLI1 BY THE PROTEASOME%REACTOME%R-HSA-5610780.1	55	-0.49790096	-1.7089816	0.002760671	0.030795608	0.9514																				31	S Phase	162	-2.3461	0	0	PCNA|PSMC5|PSMC6|PSMC3|PSMC4|PSMC1|PSMC2|POLD3|POLD4|PSMD8|PSMD9|PSMD6|PSMD7|PSMD4|PSMD5|PSMD2|PSMD3|LIG1|PSMD1|SKP1|PSMA5|PSMA6|PSMA3|PSMA4|PSMA1|PSMA2|PSME3|PSME4|PSME1|PSME2|UBA52|PSMD10|PSMB11|PSMD12|PSMD11|PSMD14|PSMD13|CDC25A|CUL1|PSMA7|PSMB10|PSMA8|PSMB6|PSMB7|PSMB4|PSMB5|UBB|PSMB2|PSMB3|MCM7|UBC|RB1|MCM8|PSMB1|MCM3|PSMF1|CDKN1A|MCM4|RPS27A|CDKN1B|MCM5|SHFM1|MCM6|CKS1B|MCM2|PSMB8|ORC5|PSMB…
MAJOR PATHWAY OF RRNA PROCESSING IN THE NUCLEOLUS AND CYTOSOL%REACTOME DATABASE ID RELEASE 73%6791226	171	-0.4152521	-1.704288	2.1253985E-4	0.03206119	0.9583																				40	Synthesis of DNA	120	-2.3487	0	0	PCNA|PSMC5|PSMC6|PSMC3|PSMC4|PSMC1|PSMC2|POLD3|POLD4|PSMD8|PSMD9|PSMD6|PSMD7|PSMD4|PSMD5|PSMD2|PSMD3|LIG1|PSMD1|SKP1|PSMA5|PSMA6|PSMA3|PSMA4|PSMA1|PSMA2|PSME3|PSME4|PSME1|PSME2|UBA52|PSMD10|PSMB11|PSMD12|PSMD11|PSMD14|PSMD13|CUL1|PSMA7|PSMB10|PSMA8|PSMB6|PSMB7|PSMB4|PSMB5|UBB|PSMB2|PSMB3|MCM7|UBC|MCM8|PSMB1|MCM3|PSMF1|MCM4|RPS27A|MCM5|SHFM1|MCM6|MCM2|PSMB8|ORC5|PSMB9|ORC4|ORC6|ORC1|ORC3|ORC2|CDT1…
REGULATION OF RUNX3 EXPRESSION AND ACTIVITY%REACTOME DATABASE ID RELEASE 73%8941858	53	-0.49635455	-1.7000024	0.0029442692	0.03321538	0.9639																				31	G1 S Transition	131	-2.351	0.0001	0	PCNA|PSMC5|PSMC6|PSMC3|PSMC4|PSMC1|PSMC2|PSMD8|PSMD9|PSMD6|PSMD7|PSMD4|PSMD5|PSMD2|PSMD3|PSMD1|SKP1|PSMA5|PSMA6|PSMA3|PSMA4|PSMA1|PSMA2|PSME3|PSME1|PSME2|UBA52|PSMD10|PSMD12|PSMD11|PSMD14|PSMD13|CDC25A|CUL1|CDK1|PSMA7|PSMB10|PSMB6|PSMB7|PSMB4|CCNB1|PSMB5|UBB|PSMB2|PSMB3|MCM7|UBC|RB1|MCM8|PSMB1|MCM3|PSMF1|CDKN1A|MCM4|RPS27A|CDKN1B|TK1|MCM5|SHFM1|MCM6|CKS1B|MCM2|PSMB8|PPP2CA|ORC5|PSMB9|PPP2CB|ORC4|…
METABOLISM OF POLYAMINES%REACTOME%R-HSA-351202.3	53	-0.49685535	-1.6973416	0.00248293	0.03390348	0.9673																					Interferon alpha beta signaling	67	-2.415	0	0	IFITM1|IFITM2|IFIT5|IFI35|IFIT1|IFIT3|IFIT2|JAK1|RSAD2|HLA-B|HLA-C|HLA-F|SOCS1|HLA-G|HLA-E|EGR1|BST2|IFNA5|IFNA4|IFNA7|HLA-A|IFNA6|IFNA1|IFNA2|IFNA8|SOCS3|RNASEL|IFI6|STAT2|IFNA13|IFNA14|TYK2|IFNA16|IFNA17|IFNA10|IFNAR1|IFNA21|ISG20|PSMB8|XAF1|PTPN1|ADAR|OASL|OAS1|IRF4|OAS2|OAS3|IRF1|IRF2|IRF8|IRF5|IRF6|PTPN6|IRF9|USP18|GBP2|IFNB1|MX2|MX1|ABCE1|IRF3|IRF7|SAMHD1|ISG15|IP6K2|IFITM3|PTPN11
HEDGEHOG 'ON' STATE%REACTOME DATABASE ID RELEASE 73%5632684	65	-0.47914356	-1.6956837	0.0022983702	0.034195237	0.9694
INTERACTIONS OF REV WITH HOST CELLULAR PROTEINS%REACTOME%R-HSA-177243.2	32	-0.5524232	-1.6946303	0.0058895205	0.034290295	0.97
INITIAL TRIGGERING OF COMPLEMENT%REACTOME DATABASE ID RELEASE 73%166663	11	-0.7145171	-1.6945372	0.011106455	0.034038406	0.97
THE CITRIC ACID (TCA) CYCLE AND RESPIRATORY ELECTRON TRANSPORT%REACTOME%R-HSA-1428517.1	136	-0.42447314	-1.6944402	2.1413276E-4	0.033803575	0.9701
TCR SIGNALING%REACTOME%R-HSA-202403.5	110	-0.4373897	-1.6932207	6.2486983E-4	0.03394125	0.9717
GTP HYDROLYSIS AND JOINING OF THE 60S RIBOSOMAL SUBUNIT%REACTOME%R-HSA-72706.2	108	-0.43923593	-1.6898311	4.255319E-4	0.03482982	0.9748
TRNA AMINOACYLATION%REACTOME%R-HSA-379724.1	22	-0.59457254	-1.6837076	0.01100693	0.036734883	0.9798
REGULATION OF PTEN STABILITY AND ACTIVITY%REACTOME DATABASE ID RELEASE 73%8948751	64	-0.47843513	-1.6829226	0.0022545604	0.03672603	0.9805
MITOTIC METAPHASE AND ANAPHASE%REACTOME DATABASE ID RELEASE 73%2555396	193	-0.40141994	-1.6818882	0.0	0.036795177	0.9805
TRANSLESION SYNTHESIS BY POLI%REACTOME%R-HSA-5656121.1	17	-0.6347717	-1.6779526	0.014130658	0.037957612	0.9841
NONSENSE MEDIATED DECAY (NMD) INDEPENDENT OF THE EXON JUNCTION COMPLEX (EJC)%REACTOME DATABASE ID RELEASE 73%975956	91	-0.44511148	-1.6705277	8.1933633E-4	0.040465713	0.9885
OVARIAN TUMOR DOMAIN PROTEASES%REACTOME DATABASE ID RELEASE 73%5689896	35	-0.534553	-1.6701962	0.003909465	0.04027181	0.9888
CYTOSOLIC SULFONATION OF SMALL MOLECULES%REACTOME DATABASE ID RELEASE 73%156584	13	-0.67726463	-1.6699176	0.012229922	0.04007791	0.9888
E3 UBIQUITIN LIGASES UBIQUITINATE TARGET PROTEINS%REACTOME%R-HSA-8866654.3	42	-0.5093629	-1.6693051	0.0058528427	0.04001385	0.9888
INTERFERON GAMMA SIGNALING%REACTOME%R-HSA-877300.2	75	-0.45665583	-1.6664809	6.309148E-4	0.04082251	0.9899
PROCESSING OF DNA DOUBLE-STRAND BREAK ENDS%REACTOME%R-HSA-5693607.1	58	-0.4777275	-1.6656556	0.003195569	0.04085729	0.9904
FC EPSILON RECEPTOR (FCERI) SIGNALING%REACTOME DATABASE ID RELEASE 73%2454202	125	-0.42049795	-1.6653513	8.574491E-4	0.040673327	0.9906
DUAL INCISION IN TC-NER%REACTOME DATABASE ID RELEASE 73%6782135	63	-0.46964568	-1.6636199	0.0029003522	0.041061778	0.9912
G2 M DNA DAMAGE CHECKPOINT%REACTOME%R-HSA-69473.5	55	-0.48445535	-1.6614273	0.0039110747	0.041623536	0.9929
MITOTIC ANAPHASE%REACTOME%R-HSA-68882.2	192	-0.39897582	-1.6600502	2.1235931E-4	0.041884508	0.9935
FORMATION OF A POOL OF FREE 40S SUBUNITS%REACTOME%R-HSA-72689.2	97	-0.43659922	-1.6597217	0.0016796137	0.04173417	0.9936
G2 M TRANSITION%REACTOME%R-HSA-69275.5	164	-0.40637854	-1.6580392	2.1231422E-4	0.04212317	0.9941
MITOTIC G2-G2 M PHASES%REACTOME%R-HSA-453274.2	166	-0.40366277	-1.6560028	0.0	0.042686	0.9946
UB-SPECIFIC PROCESSING PROTEASES%REACTOME DATABASE ID RELEASE 73%5689880	148	-0.40931198	-1.6525096	0.0	0.04383937	0.9957
RRNA PROCESSING%REACTOME DATABASE ID RELEASE 73%72312	188	-0.39715305	-1.651217	0.0	0.04408359	0.996
UNWINDING OF DNA%REACTOME DATABASE ID RELEASE 73%176974	11	-0.7028915	-1.6502014	0.014130658	0.044232972	0.9963
TRANSLESION SYNTHESIS BY POLK%REACTOME%R-HSA-5655862.1	17	-0.6248474	-1.6489154	0.012300123	0.04443936	0.9965
NON-CODING RNA METABOLISM%REACTOME DATABASE ID RELEASE 73%194441	48	-0.48928013	-1.6456902	0.004920049	0.045481663	0.997
GAP-FILLING DNA REPAIR SYNTHESIS AND LIGATION IN TC-NER%REACTOME DATABASE ID RELEASE 73%6782210	62	-0.46921408	-1.6456165	0.0038870703	0.045207947	0.997
REGULATION OF COMPLEMENT CASCADE%REACTOME DATABASE ID RELEASE 73%977606	24	-0.569751	-1.6432858	0.013640065	0.045889504	0.9974
REGULATION OF EXPRESSION OF SLITS AND ROBOS%REACTOME%R-HSA-9010553.1	151	-0.4060185	-1.6420531	0.0	0.04609213	0.9977
SNRNP ASSEMBLY%REACTOME DATABASE ID RELEASE 73%191859	48	-0.48928013	-1.6401881	0.0066611157	0.046583675	0.9981
TRANSLESION SYNTHESIS BY REV1%REACTOME DATABASE ID RELEASE 73%110312	16	-0.6352531	-1.6386815	0.017244877	0.046948604	0.9983
EUKARYOTIC TRANSLATION ELONGATION%REACTOME%R-HSA-156842.2	87	-0.44052202	-1.6378062	0.00249066	0.047049694	0.9984
EUKARYOTIC TRANSLATION TERMINATION%REACTOME DATABASE ID RELEASE 73%72764	89	-0.43841243	-1.6373522	0.0016775005	0.04695383	0.9985
MITOCHONDRIAL TRANSLATION ELONGATION%REACTOME%R-HSA-5389840.1	82	-0.44184884	-1.6363083	0.0026987751	0.04714537	0.9987
REV-MEDIATED NUCLEAR EXPORT OF HIV RNA%REACTOME%R-HSA-165054.2	30	-0.5399082	-1.6344666	0.011755001	0.047671165	0.9988
INTERACTION BETWEEN L1 AND ANKYRINS%REACTOME%R-HSA-445095.1	10	-0.7092562	-1.6314645	0.016366944	0.048720326	0.999
CLASS I PEROXISOMAL MEMBRANE PROTEIN IMPORT%REACTOME DATABASE ID RELEASE 73%9603798	18	-0.6058939	-1.6246955	0.017507724	0.051432375	0.9994
RESOLUTION OF ABASIC SITES (AP SITES)%REACTOME DATABASE ID RELEASE 73%73933	36	-0.5140894	-1.6225929	0.013446421	0.0520892	0.9994
HOMOLOGY DIRECTED REPAIR%REACTOME%R-HSA-5693538.2	93	-0.42903697	-1.6180408	0.0022755482	0.053912766	0.9998
RRNA MODIFICATION IN THE NUCLEUS AND CYTOSOL%REACTOME DATABASE ID RELEASE 73%6790901	55	-0.471406	-1.616973	0.0057070386	0.0541241	0.9998
APC-CDC20 MEDIATED DEGRADATION OF NEK2A%REACTOME DATABASE ID RELEASE 73%179409	24	-0.55825853	-1.6161836	0.016162029	0.054168668	0.9998
CHK1 CHK2(CDS1) MEDIATED INACTIVATION OF CYCLIN B:CDK1 COMPLEX%REACTOME%R-HSA-75035.4	12	-0.67217904	-1.6149805	0.02620718	0.05442406	0.9999
PEPTIDE CHAIN ELONGATION%REACTOME%R-HSA-156902.2	85	-0.43413824	-1.6124604	0.002270382	0.055291858	0.9999
REGULATION OF INNATE IMMUNE RESPONSES TO CYTOSOLIC DNA%REACTOME%R-HSA-3134975.2	12	-0.6666494	-1.6088344	0.023451965	0.056733683	0.9999
CHROMOSOME MAINTENANCE%REACTOME%R-HSA-73886.2	76	-0.4417109	-1.6083013	0.005346494	0.056665227	0.9999
CAP-DEPENDENT TRANSLATION INITIATION%REACTOME%R-HSA-72737.2	115	-0.4123325	-1.607384	0.0014802284	0.056754384	0.9999
EUKARYOTIC TRANSLATION INITIATION%REACTOME%R-HSA-72613.3	115	-0.4123325	-1.6039065	0.0018971332	0.05811633	0.9999
HDR THROUGH HOMOLOGOUS RECOMBINATION (HRR) OR SINGLE STRAND ANNEALING (SSA)%REACTOME%R-HSA-5693567.2	87	-0.4294565	-1.6036303	0.002089864	0.05791939	0.9999
NICOTINAMIDE SALVAGING%REACTOME DATABASE ID RELEASE 73%197264	12	-0.66402215	-1.6023415	0.025745811	0.058236923	0.9999
NEP NS2 INTERACTS WITH THE CELLULAR EXPORT MACHINERY%REACTOME%R-HSA-168333.3	27	-0.5372066	-1.5954034	0.018582806	0.061347127	0.9999
POLYMERASE SWITCHING%REACTOME DATABASE ID RELEASE 73%69091	14	-0.632863	-1.5930675	0.027254099	0.062240288	0.9999
TRANSPORT OF RIBONUCLEOPROTEINS INTO THE HOST NUCLEUS%REACTOME DATABASE ID RELEASE 73%168271	27	-0.53668255	-1.5914271	0.016440608	0.062749	0.9999
APC C:CDC20 MEDIATED DEGRADATION OF CYCLIN B%REACTOME DATABASE ID RELEASE 73%174048	23	-0.5576211	-1.5908806	0.024140753	0.06268663	0.9999
EXPORT OF VIRAL RIBONUCLEOPROTEINS FROM NUCLEUS%REACTOME DATABASE ID RELEASE 73%168274	27	-0.5372066	-1.5906804	0.015738498	0.0624437	0.9999
HOMOLOGOUS DNA PAIRING AND STRAND EXCHANGE%REACTOME DATABASE ID RELEASE 73%5693579	39	-0.49557358	-1.5902921	0.013391923	0.062298376	0.9999
NUCLEAR IMPORT OF REV PROTEIN%REACTOME DATABASE ID RELEASE 73%180746	29	-0.53112054	-1.5892818	0.01921069	0.062456485	0.9999
PRESYNAPTIC PHASE OF HOMOLOGOUS DNA PAIRING AND STRAND EXCHANGE%REACTOME%R-HSA-5693616.1	36	-0.50037056	-1.5870701	0.01426799	0.06323458	0.9999
LEADING STRAND SYNTHESIS%REACTOME DATABASE ID RELEASE 73%69109	14	-0.632863	-1.5868822	0.029718876	0.062986925	0.9999
MITOCHONDRIAL TRANSLATION TERMINATION%REACTOME DATABASE ID RELEASE 73%5419276	82	-0.4318273	-1.585733	0.005595855	0.063245565	0.9999
ROLE OF PHOSPHOLIPIDS IN PHAGOCYTOSIS%REACTOME DATABASE ID RELEASE 73%2029485	27	-0.5328536	-1.5852541	0.01847623	0.06316589	0.9999
TNFR2 NON-CANONICAL NF-KB PATHWAY%REACTOME DATABASE ID RELEASE 73%5668541	83	-0.42655092	-1.583748	0.0044548153	0.06362381	1.0
SRP-DEPENDENT COTRANSLATIONAL PROTEIN TARGETING TO MEMBRANE%REACTOME DATABASE ID RELEASE 73%1799339	107	-0.409491	-1.5777427	0.0023187185	0.0665457	1.0
DNA DOUBLE-STRAND BREAK REPAIR%REACTOME%R-HSA-5693532.3	117	-0.40437728	-1.5753424	0.0014915832	0.06755228	1.0
AMINO ACIDS REGULATE MTORC1%REACTOME%R-HSA-9639288.2	46	-0.47462034	-1.5742167	0.012831125	0.067823395	1.0
DDX58 IFIH1-MEDIATED INDUCTION OF INTERFERON-ALPHA BETA%REACTOME%R-HSA-168928.5	63	-0.44837946	-1.5733646	0.0059096664	0.067941345	1.0
COMPLEMENT CASCADE%REACTOME DATABASE ID RELEASE 73%166658	27	-0.5322644	-1.5699728	0.0183543	0.069453746	1.0
SIGNALING BY NOTCH4%REACTOME DATABASE ID RELEASE 73%9013694	73	-0.4308944	-1.5658249	0.007162418	0.071451165	1.0
TRANSCRIPTIONAL REGULATION BY RUNX2%REACTOME%R-HSA-8878166.2	87	-0.42014322	-1.5602747	0.0044538705	0.074374564	1.0
VIRAL MRNA TRANSLATION%REACTOME%R-HSA-192823.3	85	-0.42075717	-1.5596268	0.004414547	0.07435583	1.0
E2F MEDIATED REGULATION OF DNA REPLICATION%REACTOME DATABASE ID RELEASE 73%113510	21	-0.5603068	-1.5595567	0.02653775	0.07401223	1.0

## Sheet: 5 RT1T0vsNRT1T0_Reac
Reactome pathways upregulated in responders at follow-up vs baseline	SIZE	NES	NOM p-val	FDR q-val								Reactome pathways upregulated in non-responders at follow-up vs baseline	SIZE	NES	NOM p-val	FDR q-val																			Data and		EnrichmentMap::GS_DESCR_ Reactome_pathway_description	Gene set size	__mclCluster
TRNA MODIFICATION IN THE NUCLEUS AND CYTOSOL%REACTOME%R-HSA-6782315.5	36	2.2408996	0.0	1.0980043E-4								PROTEIN-PROTEIN INTERACTIONS AT SYNAPSES%REACTOME%R-HSA-6794362.4	34	2.0144258	0.0	0.023794092																			clustered pathways		Mitochondrial translation	93	8
MAJOR PATHWAY OF RRNA PROCESSING IN THE NUCLEOLUS AND CYTOSOL%REACTOME DATABASE ID RELEASE 73%6791226	171	2.2190967	0.0	1.0987492E-4																															associated with		Regulation of APC C activators between G1 S and early anaphase	81	1
RRNA PROCESSING%REACTOME DATABASE ID RELEASE 73%72312	188	2.2030375	0.0	1.1074098E-4								Reactome pathways downregulated in non-responders at follow-up vs baseline	SIZE	NES	NOM p-val	FDR q-val																			Figure 5		Toll Like Receptor TLR1:TLR2 Cascade	94	3
RRNA PROCESSING IN THE NUCLEUS AND CYTOSOL%REACTOME DATABASE ID RELEASE 73%8868773	181	2.1898265	0.0	1.1101575E-4								INTERFERON ALPHA BETA SIGNALING%REACTOME%R-HSA-909733.2	49	-2.4150074	0.0	0.0																			in main text		PCP CE pathway	91	1
TRNA PROCESSING%REACTOME DATABASE ID RELEASE 73%72306	93	2.1614552	0.0	1.881012E-4								G1 S TRANSITION%REACTOME DATABASE ID RELEASE 73%69206	117	-2.351035	0.0	6.003617E-5																					HDR through Homologous Recombination (HRR) or Single Strand Annealing (SSA)	132	6
CAP-DEPENDENT TRANSLATION INITIATION%REACTOME%R-HSA-72737.2	115	2.0857775	0.0	9.595471E-4	R T1T0	Comparison between Reactome pathways					NR T1T0	SYNTHESIS OF DNA%REACTOME%R-HSA-69239.2	112	-2.348744	0.0	4.0024115E-5																					Mitotic Metaphase and Anaphase	227	13
EUKARYOTIC TRANSLATION INITIATION%REACTOME%R-HSA-72613.3	115	2.084551	0.0	8.2246895E-4	59 common pathways:							S PHASE%REACTOME%R-HSA-69242.2	147	-2.346073	0.0	3.0018085E-5																					Translation initiation complex formation	59	2
L13A-MEDIATED TRANSLATIONAL SILENCING OF CERULOPLASMIN EXPRESSION%REACTOME%R-HSA-156827.3	107	2.04208	0.0	0.0017161575	37 pathways down-regulated in both comparisons							DNA REPLICATION%REACTOME DATABASE ID RELEASE 73%69306	119	-2.285405	0.0	2.4014467E-5																					Interferon alpha beta signaling	67
FORMATION OF A POOL OF FREE 40S SUBUNITS%REACTOME%R-HSA-72689.2	97	2.022658	1.4291839E-4	0.0021533568	22 pathways up-regulated in responders but down-regulated in non-responders							G0 AND EARLY G1%REACTOME%R-HSA-1538133.3	24	-2.275867	0.0	2.0012058E-5																					RNA Polymerase III Transcription	40	4
GTP HYDROLYSIS AND JOINING OF THE 60S RIBOSOMAL SUBUNIT%REACTOME%R-HSA-72706.2	108	2.0220861	0.0	0.0019660906								MITOTIC G1 PHASE AND G1 S TRANSITION%REACTOME%R-HSA-453279.4	133	-2.238085	0.0	3.3423716E-5																					Fc epsilon receptor (FCERI) signaling	135	1
RRNA MODIFICATION IN THE NUCLEUS AND CYTOSOL%REACTOME DATABASE ID RELEASE 73%6790901	55	2.0147576	0.0	0.002029106								SWITCHING OF ORIGINS TO A POST-REPLICATIVE STATE%REACTOME DATABASE ID RELEASE 73%69052	84	-2.2296064	0.0	4.396206E-5																					Cellular response to hypoxia	75	1
EUKARYOTIC TRANSLATION ELONGATION%REACTOME%R-HSA-156842.2	87	2.0020647	0.0	0.0023219155	Responders							ORC1 REMOVAL FROM CHROMATIN%REACTOME DATABASE ID RELEASE 73%68949	65	-2.204776	0.0	9.037166E-5																					G2 M DNA damage checkpoint	95	6
PEPTIDE CHAIN ELONGATION%REACTOME%R-HSA-156902.2	85	1.9860921	0.0	0.0029458278	29 unique up-regulated + 22 above							CYCLIN E ASSOCIATED EVENTS DURING G1 S TRANSITION%REACTOME%R-HSA-69202.3	75	-2.2018447	0.0	1.06123036E-4																					Ubiquitin Mediated Degradation of Phosphorylated Cdc25A	52	1
RNA POLYMERASE III TRANSCRIPTION INITIATION FROM TYPE 2 PROMOTER%REACTOME DATABASE ID RELEASE 73%76066	25	1.9729079	3.270111E-4	0.0034604718	184 unique down-regulated + 37 above							APC C-MEDIATED DEGRADATION OF CELL CYCLE PROTEINS%REACTOME%R-HSA-174143.1	80	-2.200857	0.0	9.647549E-5																					APC:Cdc20 mediated degradation of cell cycle proteins prior to satisfation of the cell cycle checkpoint	74	1
RNA POLYMERASE III TRANSCRIPTION INITIATION FROM TYPE 1 PROMOTER%REACTOME DATABASE ID RELEASE 73%76061	26	1.9365524	6.504065E-4	0.0059082615								INTERFERON SIGNALING%REACTOME%R-HSA-913531.2	161	-2.197304	0.0	9.864497E-5																					Regulation of Apoptosis	53	1
SELENOCYSTEINE SYNTHESIS%REACTOME%R-HSA-2408557.2	87	1.9358389	0.0	0.005584115								ANTIVIRAL MECHANISM BY IFN-STIMULATED GENES%REACTOME DATABASE ID RELEASE 73%1169410	74	-2.194989	0.0	9.1056885E-5																					Parasite infection	67	7
RNA POLYMERASE III TRANSCRIPTION INITIATION%REACTOME DATABASE ID RELEASE 73%76046	33	1.9298142	0.0	0.005799475	Non-responders							REGULATION OF MITOTIC CELL CYCLE%REACTOME%R-HSA-453276.2	80	-2.1920419	0.0	8.455283E-5																					Hedgehog ligand biogenesis	65	1
RNA POLYMERASE I TRANSCRIPTION INITIATION%REACTOME DATABASE ID RELEASE 73%73762	43	1.9279999	0.0	0.00561656	1 unique up-regulated							CYCLIN A:CDK2-ASSOCIATED EVENTS AT S PHASE ENTRY%REACTOME DATABASE ID RELEASE 73%69656	77	-2.1907263	0.0	7.891597E-5																					DNA Replication	128	1
VIRAL MRNA TRANSLATION%REACTOME%R-HSA-192823.3	85	1.9194843	0.0	0.0061438754	134 unique down-regulated + 37 above + 22 above							G1 S-SPECIFIC TRANSCRIPTION%REACTOME DATABASE ID RELEASE 73%69205	22	-2.1770163	0.0	9.6223936E-5																					Orc1 removal from chromatin	71	1
EUKARYOTIC TRANSLATION TERMINATION%REACTOME DATABASE ID RELEASE 73%72764	89	1.8919321	0.0	0.008800658								APC C:CDC20 MEDIATED DEGRADATION OF MITOTIC PROTEINS%REACTOME DATABASE ID RELEASE 73%176409	70	-2.1658282	0.0	9.725185E-5																					Interleukin-1 family signaling	138	24
NONSENSE MEDIATED DECAY (NMD) INDEPENDENT OF THE EXON JUNCTION COMPLEX (EJC)%REACTOME DATABASE ID RELEASE 73%975956	91	1.8530997	0.0	0.014842785								ACTIVATION OF APC C AND APC C:CDC20 MEDIATED DEGRADATION OF MITOTIC PROTEINS%REACTOME DATABASE ID RELEASE 73%176814	70	-2.1656632	0.0	9.184896E-5																					Transcription of E2F targets under negative control by DREAM complex	19	14
ACTIVATION OF THE MRNA UPON BINDING OF THE CAP-BINDING COMPLEX AND EIFS, AND SUBSEQUENT BINDING TO 43S%REACTOME DATABASE ID RELEASE 73%72662	59	1.8496746	4.489002E-4	0.014867455								G2 M CHECKPOINTS%REACTOME%R-HSA-69481.3	119	-2.1467862	0.0	1.362574E-4																					RNA Polymerase III Transcription Initiation From Type 2 Promoter	26	4
INFLUENZA VIRAL RNA TRANSCRIPTION AND REPLICATION%REACTOME%R-HSA-168273.3	126	1.8414918	0.0	0.015880862								CDC20:PHOSPHO-APC C MEDIATED DEGRADATION OF CYCLIN A%REACTOME DATABASE ID RELEASE 73%174184	68	-2.146241	0.0	1.2944452E-4																					Regulation of PTEN stability and activity	69	1
TRANSLATION INITIATION COMPLEX FORMATION%REACTOME DATABASE ID RELEASE 73%72649	58	1.8340733	1.4956626E-4	0.01689921								APC:CDC20 MEDIATED DEGRADATION OF CELL CYCLE PROTEINS PRIOR TO SATISFATION OF THE CELL CYCLE CHECKPOINT%REACTOME%R-HSA-179419.1	68	-2.1357594	0.0	1.5673881E-4																					Toll Like Receptor 3 (TLR3) Cascade	92	3
MITOCHONDRIAL TRANSLATION TERMINATION%REACTOME DATABASE ID RELEASE 73%5419276	82	1.8228896	0.0	0.01898342								CDK-MEDIATED PHOSPHORYLATION AND REMOVAL OF CDC6%REACTOME DATABASE ID RELEASE 73%69017	68	-2.1343622	0.0	1.4961432E-4																					MyD88 dependent cascade initiated on endosome	91	3
MITOCHONDRIAL TRANSLATION ELONGATION%REACTOME%R-HSA-5389840.1	82	1.8204141	1.4587892E-4	0.018868549								ASSEMBLY OF THE PRE-REPLICATIVE COMPLEX%REACTOME%R-HSA-68867.4	63	-2.1319716	0.0	1.539701E-4																					Peptide chain elongation	90	2
SELENOAMINO ACID METABOLISM%REACTOME DATABASE ID RELEASE 73%2408522	96	1.8178049	0.0	0.01883126								REGULATION OF APC C ACTIVATORS BETWEEN G1 S AND EARLY ANAPHASE%REACTOME DATABASE ID RELEASE 73%176408	75	-2.1278336	0.0	1.6236439E-4																					The citric acid (TCA) cycle and respiratory electron transport	174	9
TRNA AMINOACYLATION%REACTOME%R-HSA-379724.1	22	1.8055876	0.0023399633	0.021290341								ANTIMICROBIAL PEPTIDES%REACTOME%R-HSA-6803157.2	26	-2.1080854	0.0	2.5462647E-4																					RHO GTPases Activate ROCKs	19	15
CLASS I PEROXISOMAL MEMBRANE PROTEIN IMPORT%REACTOME DATABASE ID RELEASE 73%9603798	18	1.7997113	0.0025025024	0.022093916								DNA REPLICATION PRE-INITIATION%REACTOME DATABASE ID RELEASE 73%69002	78	-2.1073096	0.0	2.534905E-4																					AUF1 (hnRNP D0) binds and destabilizes mRNA	53	1
MITOCHONDRIAL TRANSLATION%REACTOME DATABASE ID RELEASE 73%5368287	88	1.7968515	0.0	0.022126023								B CELL ACTIVATION%REACTOME%R-HSA-983705.1	108	-2.1006763	0.0	2.9259626E-4																					DNA strand elongation	32	10
RNA POLYMERASE III ABORTIVE AND RETRACTIVE INITIATION%REACTOME%R-HSA-749476.2	38	1.7951901	0.0015842839	0.02191503								APC C:CDH1 MEDIATED DEGRADATION OF CDC20 AND OTHER APC C:CDH1 TARGETED PROTEINS IN LATE MITOSIS EARLY G1%REACTOME%R-HSA-174178.3	68	-2.084347	0.0	3.8288653E-4																					Inhibition of voltage gated Ca2+ channels via Gbeta gamma subunits	29	5
PHASE 0 - RAPID DEPOLARISATION%REACTOME%R-HSA-5576892.2	13	1.7919557	0.0040795514	0.022107212								RUNX1 REGULATES TRANSCRIPTION OF GENES INVOLVED IN DIFFERENTIATION OF HSCS%REACTOME%R-HSA-8939236.1	64	-2.063082	0.0	5.277845E-4																					GTP hydrolysis and joining of the 60S ribosomal subunit	113	2
RNA POLYMERASE III TRANSCRIPTION%REACTOME%R-HSA-74158.2	38	1.7909895	9.422111E-4	0.021704983								TRANSCRIPTION OF E2F TARGETS UNDER NEGATIVE CONTROL BY DREAM COMPLEX%REACTOME DATABASE ID RELEASE 73%1362277	18	-2.0624542	0.0	5.2194146E-4																					Assembly of the pre-replicative complex	68	1
RNA POLYMERASE I PROMOTER CLEARANCE%REACTOME%R-HSA-73854.3	46	1.7857637	0.0012488292	0.02243548								APC C:CDC20 MEDIATED DEGRADATION OF SECURIN%REACTOME DATABASE ID RELEASE 73%174154	64	-2.0569396	0.0	5.6204933E-4																					Toll Like Receptor TLR6:TLR2 Cascade	94	3
RIBOSOMAL SCANNING AND START CODON RECOGNITION%REACTOME%R-HSA-72702.3	58	1.7830327	3.010688E-4	0.022516131								SCF(SKP2)-MEDIATED DEGRADATION OF P27 P21%REACTOME%R-HSA-187577.3	54	-2.0498123	0.0	6.615963E-4																					Leishmania parasite growth and survival	174	16
RNA POLYMERASE I TRANSCRIPTION%REACTOME DATABASE ID RELEASE 73%73864	46	1.7743088	0.0012360939	0.024254637								FCERI MEDIATED NF-KB ACTIVATION%REACTOME%R-HSA-2871837.2	79	-2.0402002	0.0	8.154132E-4																					FBXL7 down-regulates AURKA during mitotic entry and in early mitosis	55	1
SYNTHESIS OF GLYCOSYLPHOSPHATIDYLINOSITOL (GPI)%REACTOME DATABASE ID RELEASE 73%162710	15	1.7739342	0.004889563	0.02369794								DEFECTIVE CFTR CAUSES CYSTIC FIBROSIS%REACTOME%R-HSA-5678895.2	56	-2.0369735	0.0	8.329411E-4																					Signaling by NOTCH3	48	17
RNA POLYMERASE III TRANSCRIPTION INITIATION FROM TYPE 3 PROMOTER%REACTOME DATABASE ID RELEASE 73%76071	25	1.7716817	0.00295858	0.02374487								CDT1 ASSOCIATION WITH THE CDC6:ORC:ORIGIN COMPLEX%REACTOME DATABASE ID RELEASE 73%68827	54	-2.031993	0.0	9.00423E-4																					C-type lectin receptors (CLRs)	134	1
MITOCHONDRIAL TRANSLATION INITIATION%REACTOME DATABASE ID RELEASE 73%5368286	82	1.7711343	4.3190326E-4	0.023286764								AUTODEGRADATION OF CDH1 BY CDH1:APC C%REACTOME DATABASE ID RELEASE 73%174084	63	-2.0241334	0.0	0.0010421869																					Activation of APC C and APC C:Cdc20 mediated degradation of mitotic proteins	77	1
RNA POLYMERASE III CHAIN ELONGATION%REACTOME DATABASE ID RELEASE 73%73780	16	1.76881	0.0032467532	0.023387374								UBIQUITIN MEDIATED DEGRADATION OF PHOSPHORYLATED CDC25A%REACTOME%R-HSA-69601.3	48	-2.0221329	0.0	0.0010524528																					RNA Polymerase III Transcription Initiation From Type 1 Promoter	27	4
MITOCHONDRIAL TRNA AMINOACYLATION%REACTOME%R-HSA-379726.1	16	1.754344	0.0044746436	0.027175698								P53-INDEPENDENT DNA DAMAGE RESPONSE%REACTOME DATABASE ID RELEASE 73%69610	48	-2.0174408	0.0	0.001148695																					G1 S Transition	131	1
RESPONSE OF EIF2AK4 (GCN2) TO AMINO ACID DEFICIENCY%REACTOME DATABASE ID RELEASE 73%9633012	95	1.7486917	4.2722872E-4	0.028335813								P53-INDEPENDENT G1 S DNA DAMAGE CHECKPOINT%REACTOME%R-HSA-69613.2	48	-2.0057454	0.0	0.001350848																					Major pathway of rRNA processing in the nucleolus and cytosol	183	18
FORMATION OF THE TERNARY COMPLEX, AND SUBSEQUENTLY, THE 43S COMPLEX%REACTOME DATABASE ID RELEASE 73%72695	51	1.7328882	0.0019593067	0.033117197								TRANSCRIPTION OF E2F TARGETS UNDER NEGATIVE CONTROL BY P107 (RBL1) AND P130 (RBL2) IN COMPLEX WITH HDAC1%REACTOME%R-HSA-1362300.2	16	-2.0054674	0.0	0.0013227515																					G2 M Checkpoints	168	6
RNA POLYMERASE I TRANSCRIPTION TERMINATION%REACTOME DATABASE ID RELEASE 73%73863	26	1.7325588	0.00522108	0.03247143								SCF-BETA-TRCP MEDIATED DEGRADATION OF EMI1%REACTOME DATABASE ID RELEASE 73%174113	51	-2.0049684	0.0	0.0013077003																					RNA Polymerase III Chain Elongation	17	4
DEFECTS IN VITAMIN AND COFACTOR METABOLISM%REACTOME DATABASE ID RELEASE 73%3296482	19	1.7063345	0.008371635	0.042495046								SCAVENGING OF HEME FROM PLASMA%REACTOME DATABASE ID RELEASE 73%2168880	13	-1.9979981	4.1152263E-4	0.0014489347																					Beta-catenin independent WNT signaling	141	1
RNA POLYMERASE I PROMOTER ESCAPE%REACTOME%R-HSA-73772.5	27	1.6987523	0.0067917206	0.045230076								REGULATION OF ACTIVATED PAK-2P34 BY PROTEASOME MEDIATED DEGRADATION%REACTOME%R-HSA-211733.1	47	-1.9902344	0.0	0.0016522752																					Selenoamino acid metabolism	116	2
NON-CODING RNA METABOLISM%REACTOME DATABASE ID RELEASE 73%194441	48	1.6963178	0.0024487297	0.04542627								AUTODEGRADATION OF THE E3 UBIQUITIN LIGASE COP1%REACTOME DATABASE ID RELEASE 73%349425	48	-1.9894705	0.0	0.0016279912																					ER-Phagosome pathway	83	1
SNRNP ASSEMBLY%REACTOME DATABASE ID RELEASE 73%191859	48	1.692802	0.0023241402	0.046199992								AUF1 (HNRNP D0) BINDS AND DESTABILIZES MRNA%REACTOME%R-HSA-450408.3	49	-1.9894277	0.0	0.0015944918																					Processing of DNA double-strand break ends	98	6
MITOCHONDRIAL PROTEIN IMPORT%REACTOME DATABASE ID RELEASE 73%1268020	56	1.670854	0.0032021957	0.056791164								ISG15 ANTIVIRAL MECHANISM%REACTOME DATABASE ID RELEASE 73%1169408	66	-1.9842948	0.0	0.0017239056																					Signal amplification	32	19
REV-MEDIATED NUCLEAR EXPORT OF HIV RNA%REACTOME%R-HSA-165054.2	30	1.6694641	0.007562349	0.056452453								UBIQUITIN-DEPENDENT DEGRADATION OF CYCLIN D%REACTOME%R-HSA-75815.3	48	-1.9838717	0.0	0.0016896966																					Ribosomal scanning and start codon recognition	59	2
TRANSPORT OF THE SLBP INDEPENDENT MATURE MRNA%REACTOME%R-HSA-159227.2	29	1.6621895	0.007486979	0.05964084								DOWNSTREAM SIGNALING EVENTS OF B CELL RECEPTOR (BCR)%REACTOME DATABASE ID RELEASE 73%1168372	76	-1.9800107	0.0	0.001773272																					Degradation of GLI1 by the proteasome	60	1
												VPU MEDIATED DEGRADATION OF CD4%REACTOME DATABASE ID RELEASE 73%180534	49	-1.9735994	0.0	0.0018857103																					RNA Polymerase III Abortive And Retractive Initiation	40	4
												REGULATION OF APOPTOSIS%REACTOME%R-HSA-169911.2	50	-1.9735663	2.092488E-4	0.0018504017																					rRNA processing	203	18
Reactome pathways downregulated in responders at follow-up vs baseline	SIZE	NES	NOM p-val	FDR q-val								DNA STRAND ELONGATION%REACTOME DATABASE ID RELEASE 73%69190	31	-1.9679637	2.0546537E-4	0.0020064588																					TCR signaling	119	1
DISEASES OF IMMUNE SYSTEM%REACTOME DATABASE ID RELEASE 73%5260271	24	-2.287271	0.0	0.0015784915								VIF-MEDIATED DEGRADATION OF APOBEC3G%REACTOME DATABASE ID RELEASE 73%180585	48	-1.9627072	4.0966817E-4	0.0021707297																					G0 and Early G1	27	14
REGULATION OF ACTIN DYNAMICS FOR PHAGOCYTIC CUP FORMATION%REACTOME DATABASE ID RELEASE 73%2029482	61	-2.2864923	0.0	7.8924577E-4								CARGO CONCENTRATION IN THE ER%REACTOME%R-HSA-5694530.1	27	-1.9600554	4.0494028E-4	0.0022541569																					Vpu mediated degradation of CD4	52	1
DISEASES ASSOCIATED WITH THE TLR SIGNALING CASCADE%REACTOME%R-HSA-5602358.1	24	-2.283402	0.0	6.4678554E-4								CYCLIN A B1 B2 ASSOCIATED EVENTS DURING G2 M TRANSITION%REACTOME DATABASE ID RELEASE 73%69273	20	-1.9522113	2.0408163E-4	0.002541135																					Autodegradation of the E3 ubiquitin ligase COP1	52	1
FCGR3A-MEDIATED PHAGOCYTOSIS%REACTOME DATABASE ID RELEASE 73%9664422	58	-2.2756236	0.0	5.7243125E-4								DEGRADATION OF AXIN%REACTOME%R-HSA-4641257.2	52	-1.9504479	0.0	0.002572307																					rRNA processing in the nucleus and cytosol	193	18
ANTIGEN PROCESSING-CROSS PRESENTATION%REACTOME%R-HSA-1236975.1	94	-2.261885	0.0	6.008252E-4								ER-PHAGOSOME PATHWAY%REACTOME%R-HSA-1236974.4	80	-1.9469477	0.0	0.0026889972																					Respiratory electron transport	100	9
LEISHMANIA PHAGOCYTOSIS%REACTOME%R-HSA-9664417.1	58	-2.2610202	0.0	5.0068763E-4								RESPIRATORY ELECTRON TRANSPORT%REACTOME DATABASE ID RELEASE 73%611105	89	-1.9453231	0.0	0.002699495																					Sema4D induced cell migration and growth-cone collapse	20	15
BINDING AND UPTAKE OF LIGANDS BY SCAVENGER RECEPTORS%REACTOME DATABASE ID RELEASE 73%2173782	26	-2.2562344	0.0	4.7903002E-4								THE ROLE OF GTSE1 IN G2 M PROGRESSION AFTER G2 CHECKPOINT%REACTOME%R-HSA-8852276.2	53	-1.940983	0.0	0.0028630993																					Oxygen-dependent proline hydroxylation of Hypoxia-inducible Factor Alpha	66	1
TOLL-LIKE RECEPTOR CASCADES%REACTOME DATABASE ID RELEASE 73%168898	134	-2.2537177	0.0	4.84004E-4								FBXL7 DOWN-REGULATES AURKA DURING MITOTIC ENTRY AND IN EARLY MITOSIS%REACTOME DATABASE ID RELEASE 73%8854050	51	-1.9365975	0.0	0.0030044033																					Regulation of ornithine decarboxylase (ODC)	51	1
PARASITE INFECTION%REACTOME%R-HSA-9664407.1	58	-2.2486887	0.0	4.4922702E-4								CROSS-PRESENTATION OF SOLUBLE EXOGENOUS ANTIGENS (ENDOSOMES)%REACTOME%R-HSA-1236978.1	46	-1.9334832	2.0790022E-4	0.0030944427																					Signaling by NOTCH4	81	1
FCGR ACTIVATION%REACTOME DATABASE ID RELEASE 73%2029481	16	-2.2329392	0.0	5.092196E-4								HH MUTANTS ABROGATE LIGAND SECRETION%REACTOME DATABASE ID RELEASE 73%5387390	53	-1.9324006	0.0	0.0031050781																					Termination of translesion DNA synthesis	32	11
MYD88 DEFICIENCY (TLR2 4)%REACTOME%R-HSA-5602498.1	10	-2.2053666	0.0	8.157131E-4								OXYGEN-DEPENDENT PROLINE HYDROXYLATION OF HYPOXIA-INDUCIBLE FACTOR ALPHA%REACTOME%R-HSA-1234176.2	58	-1.9210975	0.0	0.0036963813																					MyD88-independent TLR4 cascade	96	3
SCAVENGING OF HEME FROM PLASMA%REACTOME DATABASE ID RELEASE 73%2168880	13	-2.1991873	0.0	8.3597336E-4								NEGATIVE REGULATION OF NOTCH4 SIGNALING%REACTOME DATABASE ID RELEASE 73%9604323	51	-1.9201947	0.0	0.0036919094																					Mitochondrial translation termination	87	8
REGULATION OF COMPLEMENT CASCADE%REACTOME DATABASE ID RELEASE 73%977606	24	-2.1871557	0.0	9.4349444E-4								G1 S DNA DAMAGE CHECKPOINTS%REACTOME%R-HSA-69615.2	60	-1.9181541	0.0	0.0037496814																					Cyclin E associated events during G1 S transition	83	1
COMPLEMENT CASCADE%REACTOME DATABASE ID RELEASE 73%166658	27	-2.185893	0.0	9.262936E-4								REGULATION OF RUNX2 EXPRESSION AND ACTIVITY%REACTOME%R-HSA-8939902.1	61	-1.9151493	4.1416442E-4	0.003863783																					APC C:Cdc20 mediated degradation of mitotic proteins	76	1
LEISHMANIA INFECTION%REACTOME DATABASE ID RELEASE 73%9658195	150	-2.1792674	0.0	0.001005971								ANTIGEN ACTIVATES B CELL RECEPTOR (BCR) LEADING TO GENERATION OF SECOND MESSENGERS%REACTOME%R-HSA-983695.3	32	-1.9094	0.0010305028	0.0041721207																					Regulation of actin dynamics for phagocytic cup formation	70	7
IRAK4 DEFICIENCY (TLR2 4)%REACTOME DATABASE ID RELEASE 73%5603041	11	-2.1762984	2.392917E-4	9.988414E-4								HH MUTANTS THAT DON'T UNDERGO AUTOCATALYTIC PROCESSING ARE DEGRADED BY ERAD%REACTOME DATABASE ID RELEASE 73%5362768	52	-1.9081933	4.0983607E-4	0.0041864873																					RNA Polymerase III Transcription Initiation	35	4
PLATELET DEGRANULATION%REACTOME%R-HSA-114608.3	83	-2.1498601	0.0	0.0016305539								ABC TRANSPORTER DISORDERS%REACTOME%R-HSA-5619084.4	64	-1.9080845	4.2158517E-4	0.004128387																					Dectin-1 mediated noncanonical NF-kB signaling	60	1
PLATELET ACTIVATION, SIGNALING AND AGGREGATION%REACTOME DATABASE ID RELEASE 73%76002	183	-2.1393518	0.0	0.0017331997								NEGATIVE REGULATORS OF RIG-I MDA5 SIGNALING%REACTOME%R-HSA-936440.4	34	-1.8989971	6.1945076E-4	0.00471396																					Toll Like Receptor 9 (TLR9) Cascade	95	3
DETOXIFICATION OF REACTIVE OXYGEN SPECIES%REACTOME%R-HSA-3299685.5	24	-2.1314044	2.5523227E-4	0.0018938307								DEGRADATION OF DVL%REACTOME%R-HSA-4641258.2	53	-1.8943652	0.0	0.0050002495																					L13a-mediated translational silencing of Ceruloplasmin expression	112	2
REGULATION OF TLR BY ENDOGENOUS LIGAND%REACTOME%R-HSA-5686938.3	10	-2.1236644	0.0	0.0020457706								HEDGEHOG LIGAND BIOGENESIS%REACTOME%R-HSA-5358346.1	55	-1.8924195	2.0833334E-4	0.005087178																					DNA Replication Pre-Initiation	85	1
RESPONSE TO ELEVATED PLATELET CYTOSOLIC CA2+%REACTOME DATABASE ID RELEASE 73%76005	87	-2.1133466	0.0	0.0022939965								ACTIVATION OF ATR IN RESPONSE TO REPLICATION STRESS%REACTOME DATABASE ID RELEASE 73%176187	33	-1.8917587	8.444163E-4	0.0050714915																					Toll-like Receptor Cascades	149	3
ER-PHAGOSOME PATHWAY%REACTOME%R-HSA-1236974.4	80	-2.0957398	0.0	0.00285074								HOST INTERACTIONS OF HIV FACTORS%REACTOME%R-HSA-162909.1	118	-1.8810475	0.0	0.005911969																					CLEC7A (Dectin-1) signaling	96	1
FCGAMMA RECEPTOR (FCGR) DEPENDENT PHAGOCYTOSIS%REACTOME DATABASE ID RELEASE 73%2029480	82	-2.0907607	0.0	0.0029785775								ACTIVATION OF NF-KAPPAB IN B CELLS%REACTOME%R-HSA-1169091.1	64	-1.8795735	4.2025634E-4	0.005955748																					p53-Independent G1 S DNA damage checkpoint	52	1
INITIAL TRIGGERING OF COMPLEMENT%REACTOME DATABASE ID RELEASE 73%166663	11	-2.0889213	0.0	0.002971274								REGULATION OF ORNITHINE DECARBOXYLASE (ODC)%REACTOME DATABASE ID RELEASE 73%350562	46	-1.8778424	0.0	0.006044683																					MyD88 cascade initiated on plasma membrane	84	3
ANTIMICROBIAL PEPTIDES%REACTOME%R-HSA-6803157.2	26	-2.075316	0.0	0.0034118074								STABILIZATION OF P53%REACTOME DATABASE ID RELEASE 73%69541	52	-1.8734887	0.0	0.0063787336																					Regulation of RUNX2 expression and activity	71	1
AMYLOID FIBER FORMATION%REACTOME DATABASE ID RELEASE 73%977225	33	-2.0682492	0.0	0.003726497								FCGR ACTIVATION%REACTOME DATABASE ID RELEASE 73%2029481	16	-1.8733915	0.0022231205	0.0063113305																					Activated NOTCH1 Transmits Signal to the Nucleus	31	17
CHK1 CHK2(CDS1) MEDIATED INACTIVATION OF CYCLIN B:CDK1 COMPLEX%REACTOME%R-HSA-75035.4	12	-2.0674145	0.0	0.003640336								RESPIRATORY ELECTRON TRANSPORT, ATP SYNTHESIS BY CHEMIOSMOTIC COUPLING, AND HEAT PRODUCTION BY UNCOUPLING PROTEINS.%REACTOME%R-HSA-163200.1	92	-1.8508608	0.0	0.008468142																					Hh mutants that don't undergo autocatalytic processing are degraded by ERAD	56	1
TOLL LIKE RECEPTOR 4 (TLR4) CASCADE%REACTOME DATABASE ID RELEASE 73%166016	116	-2.0573657	0.0	0.0040685954								P53-DEPENDENT G1 DNA DAMAGE RESPONSE%REACTOME DATABASE ID RELEASE 73%69563	59	-1.849404	6.361323E-4	0.008523918																					PCNA-Dependent Long Patch Base Excision Repair	21	10
SMOOTH MUSCLE CONTRACTION%REACTOME DATABASE ID RELEASE 73%445355	27	-2.0538917	0.0	0.004145635								P53-DEPENDENT G1 S DNA DAMAGE CHECKPOINT%REACTOME%R-HSA-69580.3	59	-1.8492683	2.059308E-4	0.008433574																					Activation of GABAB receptors	43	5
INTERFERON GAMMA SIGNALING%REACTOME%R-HSA-877300.2	75	-2.0506468	0.0	0.004230384								NIK-->NONCANONICAL NF-KB SIGNALING%REACTOME%R-HSA-5676590.1	56	-1.8441622	2.104377E-4	0.008883831																					Autodegradation of Cdh1 by Cdh1:APC C	64	1
MYD88:MAL(TIRAP) CASCADE INITIATED ON PLASMA MEMBRANE%REACTOME%R-HSA-166058.3	90	-2.04884	0.0	0.0041971286								TERMINATION OF TRANSLESION DNA SYNTHESIS%REACTOME DATABASE ID RELEASE 73%5656169	30	-1.8422672	6.059382E-4	0.008983349																					Homology Directed Repair	138	6
TOLL LIKE RECEPTOR TLR1:TLR2 CASCADE%REACTOME%R-HSA-168179.1	90	-2.0450397	0.0	0.00427265								ANTIGEN PROCESSING-CROSS PRESENTATION%REACTOME%R-HSA-1236975.1	94	-1.8358183	0.0	0.009704351																					NIK-->noncanonical NF-kB signaling	59	1
INTERFERON ALPHA BETA SIGNALING%REACTOME%R-HSA-909733.2	49	-2.0440164	0.0	0.004189756								DOWNSTREAM TCR SIGNALING%REACTOME%R-HSA-202424.4	91	-1.8349365	0.0	0.009714435																					Platelet degranulation	124	20
TOLL LIKE RECEPTOR 2 (TLR2) CASCADE%REACTOME%R-HSA-181438.1	90	-2.0415812	0.0	0.0042254925								PCP CE PATHWAY%REACTOME DATABASE ID RELEASE 73%4086400	74	-1.8304329	0.0	0.010235308																					Interleukin-1 signaling	101	24
TOLL LIKE RECEPTOR TLR6:TLR2 CASCADE%REACTOME%R-HSA-168188.1	90	-2.0381627	0.0	0.0042794794								CELLULAR RESPONSE TO HYPOXIA%REACTOME DATABASE ID RELEASE 73%1234174	65	-1.8163048	8.309098E-4	0.0121299485																					Translesion synthesis by Y family DNA polymerases bypasses lesions on DNA template	39	11
EPH-EPHRIN SIGNALING%REACTOME DATABASE ID RELEASE 73%2682334	66	-2.0320807	0.0	0.004633949								RESOLUTION OF AP SITES VIA THE MULTIPLE-NUCLEOTIDE PATCH REPLACEMENT PATHWAY%REACTOME DATABASE ID RELEASE 73%110373	25	-1.8149718	0.0020483409	0.01221372																					ABC transporter disorders	77	1
ADVANCED GLYCOSYLATION ENDPRODUCT RECEPTOR SIGNALING%REACTOME%R-HSA-879415.1	12	-2.0244346	4.8285854E-4	0.0050196205								ASYMMETRIC LOCALIZATION OF PCP PROTEINS%REACTOME%R-HSA-4608870.1	55	-1.8141142	8.2152395E-4	0.012201349																					TNFR2 non-canonical NF-kB pathway	100	1
FCGR3A-MEDIATED IL10 SYNTHESIS%REACTOME%R-HSA-9664323.1	34	-2.022074	5.3319114E-4	0.0050489167								POLO-LIKE KINASE MEDIATED EVENTS%REACTOME%R-HSA-156711.2	12	-1.8121864	0.002631579	0.0123839425																					Toll Like Receptor 4 (TLR4) Cascade	123	3
INFECTION WITH MYCOBACTERIUM TUBERCULOSIS%REACTOME%R-HSA-9635486.2	26	-2.0086443	0.0	0.005960282								NEDDYLATION%REACTOME DATABASE ID RELEASE 73%8951664	191	-1.807897	0.0	0.012971851																					APC C:Cdh1 mediated degradation of Cdc20 and other APC C:Cdh1 targeted proteins in late mitosis early G1	74	1
FCERI MEDIATED MAPK ACTIVATION%REACTOME%R-HSA-2871796.2	28	-2.007709	0.0	0.005891791								DECTIN-1 MEDIATED NONCANONICAL NF-KB SIGNALING%REACTOME DATABASE ID RELEASE 73%5607761	57	-1.8070574	2.0529666E-4	0.012966851																					Transcription of E2F targets under negative control by p107 (RBL1) and p130 (RBL2) in complex with HDAC1	16	14
INTERLEUKIN-10 SIGNALING%REACTOME%R-HSA-6783783.3	30	-2.0061111	5.226026E-4	0.0058779363								COMPLEX I BIOGENESIS%REACTOME DATABASE ID RELEASE 73%6799198	48	-1.8068382	4.1467967E-4	0.012858005																					Degradation of AXIN	55	1
RHO GTPASES ACTIVATE ROCKS%REACTOME%R-HSA-5627117.2	17	-2.0057654	2.4551927E-4	0.005779916								INTERCONVERSION OF NUCLEOTIDE DI- AND TRIPHOSPHATES%REACTOME%R-HSA-499943.6	23	-1.8040221	0.0014144272	0.013182119																					Scavenging of heme from plasma	22
RHO GTPASES ACTIVATE PKNS%REACTOME%R-HSA-5625740.1	27	-1.9969971	5.197505E-4	0.006271964								PCNA-DEPENDENT LONG PATCH BASE EXCISION REPAIR%REACTOME%R-HSA-5651801.1	21	-1.8028787	0.002902156	0.013222137																					Sema4D in semaphorin signaling	24	15
ZBP1(DAI) MEDIATED INDUCTION OF TYPE I IFNS%REACTOME%R-HSA-1606322.1	20	-1.9923347	5.16129E-4	0.0065362435								RNA POLYMERASE I PROMOTER ESCAPE%REACTOME%R-HSA-73772.5	27	-1.8016022	0.002451982	0.013299095																					Formation of the ternary complex, and subsequently, the 43S complex	52	2
LEISHMANIA PARASITE GROWTH AND SURVIVAL%REACTOME%R-HSA-9664433.1	79	-1.9908878	0.0	0.0064845122								TRANSLESION SYNTHESIS BY POLH%REACTOME DATABASE ID RELEASE 73%110320	18	-1.7974148	0.004540764	0.013838731																					NOTCH3 Activation and Transmission of Signal to the Nucleus	25	17
ANTI-INFLAMMATORY RESPONSE FAVOURING LEISHMANIA PARASITE INFECTION%REACTOME%R-HSA-9662851.1	79	-1.981276	0.0	0.0072385855								REGULATION OF MRNA STABILITY BY PROTEINS THAT BIND AU-RICH ELEMENTS%REACTOME%R-HSA-450531.4	80	-1.7950816	0.0	0.014108784																					Viral mRNA Translation	90	2
CARGO CONCENTRATION IN THE ER%REACTOME%R-HSA-5694530.1	27	-1.9749979	5.186722E-4	0.0077152033								ABC-FAMILY PROTEINS MEDIATED TRANSPORT%REACTOME%R-HSA-382556.4	86	-1.7869072	0.0	0.015486229																					S Phase	162	1
TRAFFICKING AND PROCESSING OF ENDOSOMAL TLR%REACTOME%R-HSA-1679131.1	10	-1.9682618	2.3551578E-4	0.008247938								POSTMITOTIC NUCLEAR PORE COMPLEX (NPC) REFORMATION%REACTOME%R-HSA-9615933.1	24	-1.7841402	0.0030543678	0.015862975																					ABC-family proteins mediated transport	103	1
ACTIVATED NOTCH1 TRANSMITS SIGNAL TO THE NUCLEUS%REACTOME DATABASE ID RELEASE 73%2122948	24	-1.960991	0.0010333247	0.008886587								TRANSLESION SYNTHESIS BY Y FAMILY DNA POLYMERASES BYPASSES LESIONS ON DNA TEMPLATE%REACTOME%R-HSA-110313.1	36	-1.7824966	0.0022633744	0.015986148																					FCGR activation	21
SEMA4D INDUCED CELL MIGRATION AND GROWTH-CONE COLLAPSE%REACTOME%R-HSA-416572.2	16	-1.9589906	7.438631E-4	0.008913959								DISORDERS OF TRANSMEMBRANE TRANSPORTERS%REACTOME DATABASE ID RELEASE 73%5619115	121	-1.7772373	0.0	0.016812203																					Nonsense Mediated Decay (NMD) independent of the Exon Junction Complex (EJC)	96	2
RIP-MEDIATED NFKB ACTIVATION VIA ZBP1%REACTOME DATABASE ID RELEASE 73%1810476	17	-1.9553442	0.0020120724	0.009110165								NS1 MEDIATED EFFECTS ON HOST PATHWAYS%REACTOME DATABASE ID RELEASE 73%168276	35	-1.7767538	0.0016280017	0.01674069																					Defective CFTR causes cystic fibrosis	61	1
SIGNALING BY NOTCH3%REACTOME%R-HSA-9012852.2	35	-1.952367	2.6759433E-4	0.009288798								LAGGING STRAND SYNTHESIS%REACTOME%R-HSA-69186.2	20	-1.7757515	0.004149378	0.016777033																					Mitotic Anaphase	226	13
ROLE OF LAT2 NTAL LAB ON CALCIUM MOBILIZATION%REACTOME DATABASE ID RELEASE 73%2730905	14	-1.9458551	4.8111618E-4	0.0098397285								EXTENSION OF TELOMERES%REACTOME%R-HSA-180786.2	44	-1.7732013	0.0016945562	0.017184496																					Downstream TCR signaling	97	1
RHO GTPASES ACTIVATE NADPH OXIDASES%REACTOME%R-HSA-5668599.6	21	-1.9434428	7.594937E-4	0.009943532								ANTIGEN PRESENTATION: FOLDING, ASSEMBLY AND PEPTIDE LOADING OF CLASS I MHC%REACTOME DATABASE ID RELEASE 73%983170	24	-1.7628721	0.0037546933	0.019156717																					Degradation of DVL	57	1
ROLE OF PHOSPHOLIPIDS IN PHAGOCYTOSIS%REACTOME DATABASE ID RELEASE 73%2029485	27	-1.942631	5.239717E-4	0.009861662								SEPARATION OF SISTER CHROMATIDS%REACTOME DATABASE ID RELEASE 73%2467813	146	-1.7570245	0.0	0.020280303																					Platelet activation, signaling and aggregation	254	20
SEMA4D IN SEMAPHORIN SIGNALING%REACTOME DATABASE ID RELEASE 73%400685	19	-1.9388653	0.0012651822	0.010179162								TELOMERE MAINTENANCE%REACTOME%R-HSA-157579.4	57	-1.7563989	0.001443299	0.020251624																					Regulation of activated PAK-2p34 by proteasome mediated degradation	50	1
CDC6 ASSOCIATION WITH THE ORC:ORIGIN COMPLEX%REACTOME%R-HSA-68689.2	10	-1.9381282	9.400705E-4	0.0101422975								RECOGNITION OF DNA DAMAGE BY PCNA-CONTAINING REPLICATION COMPLEX%REACTOME%R-HSA-110314.1	30	-1.7548164	0.0045454544	0.020414874																					Respiratory electron transport, ATP synthesis by chemiosmotic coupling, and heat production by uncoupling proteins.	124	9
TRAF6 MEDIATED NF-KB ACTIVATION%REACTOME DATABASE ID RELEASE 73%933542	23	-1.9243594	0.0015463918	0.011689923								GAP-FILLING DNA REPAIR SYNTHESIS AND LIGATION IN GG-NER%REACTOME DATABASE ID RELEASE 73%5696397	25	-1.7531966	0.005120852	0.020601086																					TRAF6 mediated induction of NFkB and MAP kinases upon TLR7 8 or 9 activation	90	3
NOTCH3 ACTIVATION AND TRANSMISSION OF SIGNAL TO THE NUCLEUS%REACTOME DATABASE ID RELEASE 73%9013507	19	-1.9159501	0.0017672305	0.012737384								DNA DAMAGE BYPASS%REACTOME DATABASE ID RELEASE 73%73893	45	-1.7451841	4.1050903E-4	0.022393156																					Switching of origins to a post-replicative state	91	1
REGULATION OF IFNG SIGNALING%REACTOME%R-HSA-877312.2	11	-1.9144306	0.00210035	0.012748577								L13A-MEDIATED TRANSLATIONAL SILENCING OF CERULOPLASMIN EXPRESSION%REACTOME%R-HSA-156827.3	107	-1.7354637	4.237288E-4	0.024680743																					Complex I biogenesis	55	9
INITIATION OF NUCLEAR ENVELOPE (NE) REFORMATION%REACTOME DATABASE ID RELEASE 73%2995383	15	-1.9097093	0.0022332505	0.013357503								RRNA PROCESSING IN THE NUCLEUS AND CYTOSOL%REACTOME DATABASE ID RELEASE 73%8868773	181	-1.7323924	0.0	0.025302172																					Lagging Strand Synthesis	20	10
SEALING OF THE NUCLEAR ENVELOPE (NE) BY ESCRT-III%REACTOME%R-HSA-9668328.1	20	-1.9065462	0.0017430279	0.013661401								DEGRADATION OF GLI2 BY THE PROTEASOME%REACTOME DATABASE ID RELEASE 73%5610783	55	-1.7294933	0.0018579686	0.025850696																					Regulation of mitotic cell cycle	88	1
CELLULAR RESPONSE TO HYPOXIA%REACTOME DATABASE ID RELEASE 73%1234174	65	-1.9058943	0.0	0.01352323								BINDING AND UPTAKE OF LIGANDS BY SCAVENGER RECEPTORS%REACTOME DATABASE ID RELEASE 73%2173782	26	-1.7288191	0.0072224517	0.025825923																					Eukaryotic Translation Initiation	120	2
TOLL LIKE RECEPTOR 7 8 (TLR7 8) CASCADE%REACTOME%R-HSA-168181.2	86	-1.8997254	0.0	0.014214005								ACTIVATION OF THE PRE-REPLICATIVE COMPLEX%REACTOME%R-HSA-68962.3	29	-1.728024	0.0051706308	0.025822915																					Anti-inflammatory response favouring Leishmania parasite infection	174	16
TRAF6 MEDIATED INDUCTION OF NFKB AND MAP KINASES UPON TLR7 8 OR 9 ACTIVATION%REACTOME%R-HSA-975138.2	85	-1.8964989	0.0	0.014512784								REGULATION OF RAS BY GAPS%REACTOME%R-HSA-5658442.1	60	-1.7187002	0.0010360547	0.028216455																					G1 S DNA Damage Checkpoints	68	1
MYD88 DEPENDENT CASCADE INITIATED ON ENDOSOME%REACTOME DATABASE ID RELEASE 73%975155	86	-1.8960143	0.0	0.014361253								GLI3 IS PROCESSED TO GLI3R BY THE PROTEASOME%REACTOME DATABASE ID RELEASE 73%5610785	55	-1.7127244	0.002739726	0.029804002																					GABA B receptor activation	43	5
KERATAN SULFATE BIOSYNTHESIS%REACTOME DATABASE ID RELEASE 73%2022854	14	-1.893253	0.0031048483	0.014609982								DEGRADATION OF GLI1 BY THE PROTEASOME%REACTOME%R-HSA-5610780.1	55	-1.7089816	0.002760671	0.030795608																					Mitochondrial translation elongation	87	8
TGF-BETA RECEPTOR SIGNALING IN EMT (EPITHELIAL TO MESENCHYMAL TRANSITION)%REACTOME%R-HSA-2173791.1	14	-1.890204	0.0019516955	0.014886769								MAJOR PATHWAY OF RRNA PROCESSING IN THE NUCLEOLUS AND CYTOSOL%REACTOME DATABASE ID RELEASE 73%6791226	171	-1.704288	2.1253985E-4	0.03206119																					Influenza Viral RNA Transcription and Replication	133	2
AQUAPORIN-MEDIATED TRANSPORT%REACTOME DATABASE ID RELEASE 73%445717	27	-1.8840305	7.8595756E-4	0.015712302								REGULATION OF RUNX3 EXPRESSION AND ACTIVITY%REACTOME DATABASE ID RELEASE 73%8941858	53	-1.7000024	0.0029442692	0.03321538																					Activation of the mRNA upon binding of the cap-binding complex and eIFs, and subsequent binding to 43S	60	2
DEFECTIVE CFTR CAUSES CYSTIC FIBROSIS%REACTOME%R-HSA-5678895.2	56	-1.8814616	2.943774E-4	0.015882855								METABOLISM OF POLYAMINES%REACTOME%R-HSA-351202.3	53	-1.6973416	0.00248293	0.03390348																					Response to elevated platelet cytosolic Ca2+	129	20
INTERLEUKIN-1 SIGNALING%REACTOME DATABASE ID RELEASE 73%9020702	96	-1.8786557	0.0	0.016128113								HEDGEHOG 'ON' STATE%REACTOME DATABASE ID RELEASE 73%5632684	65	-1.6956837	0.0022983702	0.034195237																					SCF-beta-TrCP mediated degradation of Emi1	55	1
SIGNAL AMPLIFICATION%REACTOME DATABASE ID RELEASE 73%392518	22	-1.8728222	0.0012738854	0.016928237								INTERACTIONS OF REV WITH HOST CELLULAR PROTEINS%REACTOME%R-HSA-177243.2	32	-1.6946303	0.0058895205	0.034290295																					Cdc20:Phospho-APC C mediated degradation of Cyclin A	73	1
O2 CO2 EXCHANGE IN ERYTHROCYTES%REACTOME DATABASE ID RELEASE 73%1480926	12	-1.8664957	0.0021377672	0.017927254								INITIAL TRIGGERING OF COMPLEMENT%REACTOME DATABASE ID RELEASE 73%166663	11	-1.6945372	0.011106455	0.034038406																					Synthesis of DNA	120	1
TOLL LIKE RECEPTOR 9 (TLR9) CASCADE%REACTOME%R-HSA-168138.1	90	-1.8662566	0.0	0.017720908								THE CITRIC ACID (TCA) CYCLE AND RESPIRATORY ELECTRON TRANSPORT%REACTOME%R-HSA-1428517.1	136	-1.6944402	2.1413276E-4	0.033803575																					Cyclin A:Cdk2-associated events at S phase entry	85	1
ENDOSOMAL SORTING COMPLEX REQUIRED FOR TRANSPORT (ESCRT)%REACTOME DATABASE ID RELEASE 73%917729	29	-1.8618153	0.0013241526	0.018347435								TCR SIGNALING%REACTOME%R-HSA-202403.5	110	-1.6932207	6.2486983E-4	0.03394125																					GLI3 is processed to GLI3R by the proteasome	60	1
ERYTHROCYTES TAKE UP CARBON DIOXIDE AND RELEASE OXYGEN%REACTOME%R-HSA-1237044.2	12	-1.8593496	0.002167108	0.018556243								GTP HYDROLYSIS AND JOINING OF THE 60S RIBOSOMAL SUBUNIT%REACTOME%R-HSA-72706.2	108	-1.6898311	4.255319E-4	0.03482982																					Fcgamma receptor (FCGR) dependent phagocytosis	94	7
THROMBIN SIGNALLING THROUGH PROTEINASE ACTIVATED RECEPTORS (PARS)%REACTOME DATABASE ID RELEASE 73%456926	21	-1.8588451	0.0027855153	0.018423064								TRNA AMINOACYLATION%REACTOME%R-HSA-379724.1	22	-1.6837076	0.01100693	0.036734883																					Regulation of RUNX3 expression and activity	55	1
INHIBITION OF VOLTAGE GATED CA2+ CHANNELS VIA GBETA GAMMA SUBUNITS%REACTOME%R-HSA-997272.1	13	-1.8565943	0.00458273	0.018625462								REGULATION OF PTEN STABILITY AND ACTIVITY%REACTOME DATABASE ID RELEASE 73%8948751	64	-1.6829226	0.0022545604	0.03672603																					Antigen processing-Cross presentation	99	1
RAB GERANYLGERANYLATION%REACTOME DATABASE ID RELEASE 73%8873719	48	-1.8527534	8.6931325E-4	0.019152446								MITOTIC METAPHASE AND ANAPHASE%REACTOME DATABASE ID RELEASE 73%2555396	193	-1.6818882	0.0	0.036795177																					CDK-mediated phosphorylation and removal of Cdc6	73	1
INTERLEUKIN-15 SIGNALING%REACTOME%R-HSA-8983432.3	14	-1.8504786	0.0036719707	0.019379532								TRANSLESION SYNTHESIS BY POLI%REACTOME%R-HSA-5656121.1	17	-1.6779526	0.014130658	0.037957612																					Toll Like Receptor 10 (TLR10) Cascade	84	3
INWARDLY RECTIFYING K+ CHANNELS%REACTOME DATABASE ID RELEASE 73%1296065	13	-1.8499347	0.0033906514	0.019273572								NONSENSE MEDIATED DECAY (NMD) INDEPENDENT OF THE EXON JUNCTION COMPLEX (EJC)%REACTOME DATABASE ID RELEASE 73%975956	91	-1.6705277	8.1933633E-4	0.040465713																					p53-Dependent G1 DNA Damage Response	66	1
GRB2:SOS PROVIDES LINKAGE TO MAPK SIGNALING FOR INTEGRINS%REACTOME%R-HSA-354194.1	10	-1.8451871	0.003828667	0.020035477								OVARIAN TUMOR DOMAIN PROTEASES%REACTOME DATABASE ID RELEASE 73%5689896	35	-1.6701962	0.003909465	0.04027181																					Metabolism of polyamines	58	1
G PROTEIN GATED POTASSIUM CHANNELS%REACTOME%R-HSA-1296059.1	13	-1.8443322	0.0045618247	0.019979887								CYTOSOLIC SULFONATION OF SMALL MOLECULES%REACTOME DATABASE ID RELEASE 73%156584	13	-1.6699176	0.012229922	0.04007791																					Degradation of GLI2 by the proteasome	60	1
TRIF(TICAM1)-MEDIATED TLR4 SIGNALING%REACTOME DATABASE ID RELEASE 73%937061	92	-1.8432124	3.4059945E-4	0.019932583								E3 UBIQUITIN LIGASES UBIQUITINATE TARGET PROTEINS%REACTOME%R-HSA-8866654.3	42	-1.6693051	0.0058528427	0.04001385																					Leishmania infection	255	16
TOLL LIKE RECEPTOR 5 (TLR5) CASCADE%REACTOME%R-HSA-168176.1	81	-1.8398505	0.0	0.020446306								INTERFERON GAMMA SIGNALING%REACTOME%R-HSA-877300.2	75	-1.6664809	6.309148E-4	0.04082251																					SCF(Skp2)-mediated degradation of p27 p21	60	1
MYD88-INDEPENDENT TLR4 CASCADE%REACTOME%R-HSA-166166.2	92	-1.8395231	0.0	0.020279616								PROCESSING OF DNA DOUBLE-STRAND BREAK ENDS%REACTOME%R-HSA-5693607.1	58	-1.6656556	0.003195569	0.04085729																					Asymmetric localization of PCP proteins	64	1
MYD88 CASCADE INITIATED ON PLASMA MEMBRANE%REACTOME%R-HSA-975871.1	81	-1.8389226	3.254149E-4	0.020151645								FC EPSILON RECEPTOR (FCERI) SIGNALING%REACTOME DATABASE ID RELEASE 73%2454202	125	-1.6653513	8.574491E-4	0.040673327																					p53-Dependent G1 S DNA damage checkpoint	66	1
GABA B RECEPTOR ACTIVATION%REACTOME DATABASE ID RELEASE 73%977444	20	-1.8387817	0.0045203418	0.019957222								DUAL INCISION IN TC-NER%REACTOME DATABASE ID RELEASE 73%6782135	63	-1.6636199	0.0029003522	0.041061778																					Resolution of AP sites via the multiple-nucleotide patch replacement pathway	25	10
ACTIVATION OF G PROTEIN GATED POTASSIUM CHANNELS%REACTOME%R-HSA-1296041.1	13	-1.8368819	0.003371869	0.020131964								G2 M DNA DAMAGE CHECKPOINT%REACTOME%R-HSA-69473.5	55	-1.6614273	0.0039110747	0.041623536																					CDT1 association with the CDC6:ORC:origin complex	59	1
ACTIVATION OF GABAB RECEPTORS%REACTOME%R-HSA-991365.3	20	-1.8346486	0.00477267	0.020348785								MITOTIC ANAPHASE%REACTOME%R-HSA-68882.2	192	-1.6600502	2.1235931E-4	0.041884508																					Mitotic G1 phase and G1 S transition	148	1
RHO GTPASES ACTIVATE PAKS%REACTOME%R-HSA-5627123.2	17	-1.830964	0.0019502682	0.020941027								FORMATION OF A POOL OF FREE 40S SUBUNITS%REACTOME%R-HSA-72689.2	97	-1.6597217	0.0016796137	0.04173417																					Eukaryotic Translation Elongation	94	2
TOLL LIKE RECEPTOR 10 (TLR10) CASCADE%REACTOME DATABASE ID RELEASE 73%168142	81	-1.8292935	3.2499188E-4	0.02106249								G2 M TRANSITION%REACTOME%R-HSA-69275.5	164	-1.6580392	2.1231422E-4	0.04212317																					Separation of Sister Chromatids	169	13
GABA RECEPTOR ACTIVATION%REACTOME%R-HSA-977443.4	23	-1.8286812	0.0018191268	0.02096327								MITOTIC G2-G2 M PHASES%REACTOME%R-HSA-453274.2	166	-1.6560028	0.0	0.042686																					Recognition of DNA damage by PCNA-containing replication complex	30	11
OXYGEN-DEPENDENT PROLINE HYDROXYLATION OF HYPOXIA-INDUCIBLE FACTOR ALPHA%REACTOME%R-HSA-1234176.2	58	-1.8276933	0.0	0.020980231								UB-SPECIFIC PROCESSING PROTEASES%REACTOME DATABASE ID RELEASE 73%5689880	148	-1.6525096	0.0	0.04383937																					Toll Like Receptor 5 (TLR5) Cascade	84	3
CHAPERONIN-MEDIATED PROTEIN FOLDING%REACTOME DATABASE ID RELEASE 73%390466	70	-1.8227781	6.1462814E-4	0.02181332								RRNA PROCESSING%REACTOME DATABASE ID RELEASE 73%72312	188	-1.651217	0.0	0.04408359																					DNA Damage Bypass	48	11
GOLGI CISTERNAE PERICENTRIOLAR STACK REORGANIZATION%REACTOME%R-HSA-162658.1	11	-1.8207974	0.005925575	0.022047257								UNWINDING OF DNA%REACTOME DATABASE ID RELEASE 73%176974	11	-1.6502014	0.014130658	0.044232972																					Toll Like Receptor 7 8 (TLR7 8) Cascade	91	3
ASSEMBLY OF THE PRE-REPLICATIVE COMPLEX%REACTOME%R-HSA-68867.4	63	-1.8200281	0.0	0.022001026								TRANSLESION SYNTHESIS BY POLK%REACTOME%R-HSA-5655862.1	17	-1.6489154	0.012300123	0.04443936																					Selenocysteine synthesis	93	2
G-PROTEIN ACTIVATION%REACTOME DATABASE ID RELEASE 73%202040	15	-1.8191735	0.002186589	0.021977853								NON-CODING RNA METABOLISM%REACTOME DATABASE ID RELEASE 73%194441	48	-1.6456902	0.004920049	0.045481663																					Toll Like Receptor 2 (TLR2) Cascade	94	3
INTERLEUKIN-6 SIGNALING%REACTOME%R-HSA-1059683.2	10	-1.8166151	0.0056061666	0.022312986								GAP-FILLING DNA REPAIR SYNTHESIS AND LIGATION IN TC-NER%REACTOME DATABASE ID RELEASE 73%6782210	62	-1.6456165	0.0038870703	0.045207947																					Thrombin signalling through proteinase activated receptors (PARs)	31	19
INTERLEUKIN-4 AND INTERLEUKIN-13 SIGNALING%REACTOME%R-HSA-6785807.5	71	-1.8037459	6.1500614E-4	0.025159646								REGULATION OF COMPLEMENT CASCADE%REACTOME DATABASE ID RELEASE 73%977606	24	-1.6432858	0.013640065	0.045889504																					Activation of G protein gated Potassium channels	29	5
INTERLEUKIN-1 FAMILY SIGNALING%REACTOME DATABASE ID RELEASE 73%446652	119	-1.8005729	0.0	0.025611896								REGULATION OF EXPRESSION OF SLITS AND ROBOS%REACTOME%R-HSA-9010553.1	151	-1.6420531	0.0	0.04609213																					Stabilization of p53	57	1
IRON UPTAKE AND TRANSPORT%REACTOME DATABASE ID RELEASE 73%917937	45	-1.7988373	8.7234663E-4	0.025855126								SNRNP ASSEMBLY%REACTOME DATABASE ID RELEASE 73%191859	48	-1.6401881	0.0066611157	0.046583675																					The role of GTSE1 in G2 M progression after G2 checkpoint	60	1
VASOPRESSIN REGULATES RENAL WATER HOMEOSTASIS VIA AQUAPORINS%REACTOME%R-HSA-432040.2	25	-1.7954311	0.0028226841	0.026467135								TRANSLESION SYNTHESIS BY REV1%REACTOME DATABASE ID RELEASE 73%110312	16	-1.6386815	0.017244877	0.046948604																					FCERI mediated NF-kB activation	87	1
PCP CE PATHWAY%REACTOME DATABASE ID RELEASE 73%4086400	74	-1.7887963	0.0	0.027928626								EUKARYOTIC TRANSLATION ELONGATION%REACTOME%R-HSA-156842.2	87	-1.6378062	0.00249066	0.047049694																					Mitochondrial translation initiation	87	8
REGULATION OF INSULIN SECRETION%REACTOME%R-HSA-422356.3	43	-1.7848924	0.002012651	0.028693432								EUKARYOTIC TRANSLATION TERMINATION%REACTOME DATABASE ID RELEASE 73%72764	89	-1.6373522	0.0016775005	0.04695383																					Interferon gamma signaling	90
NOTCH2 ACTIVATION AND TRANSMISSION OF SIGNAL TO THE NUCLEUS%REACTOME%R-HSA-2979096.1	16	-1.7846009	0.008780488	0.028497895								MITOCHONDRIAL TRANSLATION ELONGATION%REACTOME%R-HSA-5389840.1	82	-1.6363083	0.0026987751	0.04714537																					Leishmania phagocytosis	67	7
P130CAS LINKAGE TO MAPK SIGNALING FOR INTEGRINS%REACTOME%R-HSA-372708.1	10	-1.784543	0.0067536095	0.02824322								REV-MEDIATED NUCLEAR EXPORT OF HIV RNA%REACTOME%R-HSA-165054.2	30	-1.6344666	0.011755001	0.047671165																					Negative regulation of NOTCH4 signaling	53	1
NEGATIVE REGULATION OF FGFR4 SIGNALING%REACTOME DATABASE ID RELEASE 73%5654733	14	-1.7818758	0.0059980806	0.02870062								INTERACTION BETWEEN L1 AND ANKYRINS%REACTOME%R-HSA-445095.1	10	-1.6314645	0.016366944	0.048720326																					FCGR3A-mediated phagocytosis	67	7
NEGATIVE REGULATION OF FGFR2 SIGNALING%REACTOME%R-HSA-5654727.1	14	-1.7800108	0.007033713	0.028924795								CLASS I PEROXISOMAL MEMBRANE PROTEIN IMPORT%REACTOME DATABASE ID RELEASE 73%9603798	18	-1.6246955	0.017507724	0.051432375																					APC C-mediated degradation of cell cycle proteins	88	1
IKK COMPLEX RECRUITMENT MEDIATED BY RIP1%REACTOME DATABASE ID RELEASE 73%937041	21	-1.7726763	0.006758448	0.030644948								RESOLUTION OF ABASIC SITES (AP SITES)%REACTOME DATABASE ID RELEASE 73%73933	36	-1.6225929	0.013446421	0.0520892																					GABA receptor activation	60	5
GROWTH HORMONE RECEPTOR SIGNALING%REACTOME%R-HSA-982772.1	17	-1.7720603	0.006116956	0.03054307								HOMOLOGY DIRECTED REPAIR%REACTOME%R-HSA-5693538.2	93	-1.6180408	0.0022755482	0.053912766																					TRIF(TICAM1)-mediated TLR4 signaling	96	3
NEGATIVE REGULATION OF FGFR1 SIGNALING%REACTOME%R-HSA-5654726.2	14	-1.7718093	0.008077928	0.030346883								RRNA MODIFICATION IN THE NUCLEUS AND CYTOSOL%REACTOME DATABASE ID RELEASE 73%6790901	55	-1.616973	0.0057070386	0.0541241																					G protein gated Potassium channels	29	5
SPRY REGULATION OF FGF SIGNALING%REACTOME DATABASE ID RELEASE 73%1295596	13	-1.7706155	0.008093311	0.030406814								APC-CDC20 MEDIATED DEGRADATION OF NEK2A%REACTOME DATABASE ID RELEASE 73%179409	24	-1.6161836	0.016162029	0.054168668																					Inwardly rectifying K+ channels	35	5
ADP SIGNALLING THROUGH P2Y PURINOCEPTOR 1%REACTOME%R-HSA-418592.2	16	-1.7662606	0.0070593962	0.03143051								CHK1 CHK2(CDS1) MEDIATED INACTIVATION OF CYCLIN B:CDK1 COMPLEX%REACTOME%R-HSA-75035.4	12	-1.6149805	0.02620718	0.05442406																					Response of EIF2AK4 (GCN2) to amino acid deficiency	102	2
NEGATIVE REGULATION OF FGFR3 SIGNALING%REACTOME DATABASE ID RELEASE 73%5654732	14	-1.7662244	0.01056169	0.031164778								PEPTIDE CHAIN ELONGATION%REACTOME%R-HSA-156902.2	85	-1.6124604	0.002270382	0.055291858																					Cap-dependent Translation Initiation	120	2
DDX58 IFIH1-MEDIATED INDUCTION OF INTERFERON-ALPHA BETA%REACTOME%R-HSA-168928.5	63	-1.7651708	2.993116E-4	0.031224186								REGULATION OF INNATE IMMUNE RESPONSES TO CYTOSOLIC DNA%REACTOME%R-HSA-3134975.2	12	-1.6088344	0.023451965	0.056733683																					Hedgehog 'on' state	85	1
PROSTACYCLIN SIGNALLING THROUGH PROSTACYCLIN RECEPTOR%REACTOME%R-HSA-392851.2	12	-1.7648711	0.0054945056	0.031053592								CHROMOSOME MAINTENANCE%REACTOME%R-HSA-73886.2	76	-1.6083013	0.005346494	0.056665227																					Downstream signaling events of B Cell Receptor (BCR)	79	1
HEDGEHOG LIGAND BIOGENESIS%REACTOME%R-HSA-5358346.1	55	-1.7645055	0.0014475969	0.030894436								CAP-DEPENDENT TRANSLATION INITIATION%REACTOME%R-HSA-72737.2	115	-1.607384	0.0014802284	0.056754384																					DNA Double-Strand Break Repair	166	6
EPHB-MEDIATED FORWARD SIGNALING%REACTOME%R-HSA-3928662.2	30	-1.7619954	0.003197442	0.031338543								EUKARYOTIC TRANSLATION INITIATION%REACTOME%R-HSA-72613.3	115	-1.6039065	0.0018971332	0.05811633																					APC C:Cdc20 mediated degradation of Securin	68	1
HH MUTANTS THAT DON'T UNDERGO AUTOCATALYTIC PROCESSING ARE DEGRADED BY ERAD%REACTOME DATABASE ID RELEASE 73%5362768	52	-1.7552334	5.858231E-4	0.033135947								HDR THROUGH HOMOLOGOUS RECOMBINATION (HRR) OR SINGLE STRAND ANNEALING (SSA)%REACTOME%R-HSA-5693567.2	87	-1.6036303	0.002089864	0.05791939																					Transcriptional regulation by RUNX2	118	1
COMMON PATHWAY OF FIBRIN CLOT FORMATION%REACTOME%R-HSA-140875.4	10	-1.7496836	0.00969955	0.034547437								NICOTINAMIDE SALVAGING%REACTOME DATABASE ID RELEASE 73%197264	12	-1.6023415	0.025745811	0.058236923																					RNA Polymerase III Transcription Initiation From Type 3 Promoter	27	4
ADRENALINE,NORADRENALINE INHIBITS INSULIN SECRETION%REACTOME DATABASE ID RELEASE 73%400042	14	-1.7445693	0.011302211	0.03586399								NEP NS2 INTERACTS WITH THE CELLULAR EXPORT MACHINERY%REACTOME%R-HSA-168333.3	27	-1.5954034	0.018582806	0.061347127																					p53-Independent DNA Damage Response	52	1
TOLL LIKE RECEPTOR 3 (TLR3) CASCADE%REACTOME%R-HSA-168164.3	89	-1.7422715	0.0013596193	0.036302537								POLYMERASE SWITCHING%REACTOME DATABASE ID RELEASE 73%69091	14	-1.5930675	0.027254099	0.062240288																					Regulation of RAS by GAPs	67	1
PROTEIN FOLDING%REACTOME%R-HSA-391251.1	76	-1.7418969	9.290802E-4	0.03615629								TRANSPORT OF RIBONUCLEOPROTEINS INTO THE HOST NUCLEUS%REACTOME DATABASE ID RELEASE 73%168271	27	-1.5914271	0.016440608	0.062749																					Regulation of mRNA stability by proteins that bind AU-rich elements	84	1
SIGNALING BY NOTCH2%REACTOME DATABASE ID RELEASE 73%1980145	25	-1.7404801	0.006837174	0.036304306								APC C:CDC20 MEDIATED DEGRADATION OF CYCLIN B%REACTOME DATABASE ID RELEASE 73%174048	23	-1.5908806	0.024140753	0.06268663																					Formation of a pool of free 40S subunits	102	2
E2F MEDIATED REGULATION OF DNA REPLICATION%REACTOME DATABASE ID RELEASE 73%113510	21	-1.7398708	0.00954534	0.036189783								EXPORT OF VIRAL RIBONUCLEOPROTEINS FROM NUCLEUS%REACTOME DATABASE ID RELEASE 73%168274	27	-1.5906804	0.015738498	0.0624437																					G-protein activation	28	19
ADP SIGNALLING THROUGH P2Y PURINOCEPTOR 12%REACTOME%R-HSA-392170.2	14	-1.73758	0.011266226	0.03661107								HOMOLOGOUS DNA PAIRING AND STRAND EXCHANGE%REACTOME DATABASE ID RELEASE 73%5693579	39	-1.5902921	0.013391923	0.062298376																					Antimicrobial peptides	94
GLYCOSAMINOGLYCAN METABOLISM%REACTOME%R-HSA-1630316.2	70	-1.7344168	9.481669E-4	0.0373384								NUCLEAR IMPORT OF REV PROTEIN%REACTOME DATABASE ID RELEASE 73%180746	29	-1.5892818	0.01921069	0.062456485																					Eukaryotic Translation Termination	94	2
PROLONGED ERK ACTIVATION EVENTS%REACTOME%R-HSA-169893.1	12	-1.7333713	0.012307692	0.03738634								PRESYNAPTIC PHASE OF HOMOLOGOUS DNA PAIRING AND STRAND EXCHANGE%REACTOME%R-HSA-5693616.1	36	-1.5870701	0.01426799	0.06323458																					MyD88:MAL(TIRAP) cascade initiated on plasma membrane	94	3
ROS AND RNS PRODUCTION IN PHAGOCYTES%REACTOME DATABASE ID RELEASE 73%1222556	26	-1.7289724	0.0064968816	0.03851239								LEADING STRAND SYNTHESIS%REACTOME DATABASE ID RELEASE 73%69109	14	-1.5868822	0.029718876	0.062986925																					Cross-presentation of soluble exogenous antigens (endosomes)	50	1
COPII-MEDIATED VESICLE TRANSPORT%REACTOME%R-HSA-204005.4	62	-1.718258	9.11577E-4	0.041949414								MITOCHONDRIAL TRANSLATION TERMINATION%REACTOME DATABASE ID RELEASE 73%5419276	82	-1.585733	0.005595855	0.063245565																					Ubiquitin-dependent degradation of Cyclin D	52	1
RHO GTPASES ACTIVATE WASPS AND WAVES%REACTOME%R-HSA-5663213.1	32	-1.7177237	0.007951233	0.041831076								ROLE OF PHOSPHOLIPIDS IN PHAGOCYTOSIS%REACTOME DATABASE ID RELEASE 73%2029485	27	-1.5852541	0.01847623	0.06316589																					Activation of NF-kappaB in B cells	67	1
CONDENSATION OF PROMETAPHASE CHROMOSOMES%REACTOME%R-HSA-2514853.2	10	-1.7165513	0.012067765	0.041938648								TNFR2 NON-CANONICAL NF-KB PATHWAY%REACTOME DATABASE ID RELEASE 73%5668541	83	-1.583748	0.0044548153	0.06362381																					Vif-mediated degradation of APOBEC3G	53	1
ANTIGEN PRESENTATION: FOLDING, ASSEMBLY AND PEPTIDE LOADING OF CLASS I MHC%REACTOME DATABASE ID RELEASE 73%983170	24	-1.715177	0.007227672	0.042112336								SRP-DEPENDENT COTRANSLATIONAL PROTEIN TARGETING TO MEMBRANE%REACTOME DATABASE ID RELEASE 73%1799339	107	-1.5777427	0.0023187185	0.0665457																					B Cell Activation	115	1
TBC RABGAPS%REACTOME DATABASE ID RELEASE 73%8854214	41	-1.713452	0.0025395034	0.042413097								DNA DOUBLE-STRAND BREAK REPAIR%REACTOME%R-HSA-5693532.3	117	-1.5753424	0.0014915832	0.06755228																					Hh mutants abrogate ligand secretion	59	1
RESPONSE OF MTB TO PHAGOCYTOSIS%REACTOME%R-HSA-9637690.1	22	-1.7118924	0.010165184	0.04265463								AMINO ACIDS REGULATE MTORC1%REACTOME%R-HSA-9639288.2	46	-1.5742167	0.012831125	0.067823395																					Neddylation	233
INFLAMMASOMES%REACTOME%R-HSA-622312.1	20	-1.7095038	0.010673444	0.043191236								DDX58 IFIH1-MEDIATED INDUCTION OF INTERFERON-ALPHA BETA%REACTOME%R-HSA-168928.5	63	-1.5733646	0.0059096664	0.067941345
FORMATION OF FIBRIN CLOT (CLOTTING CASCADE)%REACTOME%R-HSA-140877.2	18	-1.7077775	0.008464028	0.043531053								COMPLEMENT CASCADE%REACTOME DATABASE ID RELEASE 73%166658	27	-1.5699728	0.0183543	0.069453746
NF-KB ACTIVATION THROUGH FADD RIP-1 PATHWAY MEDIATED BY CASPASE-8 AND -10%REACTOME%R-HSA-933543.3	12	-1.7063434	0.011148008	0.043738786								SIGNALING BY NOTCH4%REACTOME DATABASE ID RELEASE 73%9013694	73	-1.5658249	0.007162418	0.071451165
ABC TRANSPORTER DISORDERS%REACTOME%R-HSA-5619084.4	64	-1.7044986	0.0021511985	0.04408681								TRANSCRIPTIONAL REGULATION BY RUNX2%REACTOME%R-HSA-8878166.2	87	-1.5602747	0.0044538705	0.074374564
EPH-EPHRIN MEDIATED REPULSION OF CELLS%REACTOME DATABASE ID RELEASE 73%3928665	30	-1.7041214	0.004011768	0.0439378								VIRAL MRNA TRANSLATION%REACTOME%R-HSA-192823.3	85	-1.5596268	0.004414547	0.07435583
PLATELET HOMEOSTASIS%REACTOME%R-HSA-418346.2	54	-1.7018281	0.0032534753	0.04442142								E2F MEDIATED REGULATION OF DNA REPLICATION%REACTOME DATABASE ID RELEASE 73%113510	21	-1.5595567	0.02653775	0.07401223
DISEASES OF PROGRAMMED CELL DEATH%REACTOME%R-HSA-9645723.2	21	-1.701694	0.010874938	0.044147655
RHO GTPASES ACTIVATE CIT%REACTOME%R-HSA-5625900.2	17	-1.700462	0.013258542	0.044232354
BETA-CATENIN INDEPENDENT WNT SIGNALING%REACTOME DATABASE ID RELEASE 73%3858494	111	-1.700343	3.5137034E-4	0.043966312
GLUCAGON-LIKE PEPTIDE-1 (GLP1) REGULATES INSULIN SECRETION%REACTOME%R-HSA-381676.2	23	-1.6985798	0.0099346405	0.044287905
NEURODEGENERATIVE DISEASES%REACTOME%R-HSA-8863678.1	20	-1.6981173	0.010473816	0.044161715
INTERLEUKIN-6 FAMILY SIGNALING%REACTOME DATABASE ID RELEASE 73%6783589	13	-1.6962209	0.019034022	0.044562377
ECM PROTEOGLYCANS%REACTOME%R-HSA-3000178.3	23	-1.6951941	0.012352033	0.044646118
ER QUALITY CONTROL COMPARTMENT (ERQC)%REACTOME%R-HSA-901032.5	20	-1.6945096	0.009254627	0.044601817
REGULATED PROTEOLYSIS OF P75NTR%REACTOME%R-HSA-193692.1	10	-1.6891551	0.01650779	0.04631124
THROMBOXANE SIGNALLING THROUGH TP RECEPTOR%REACTOME%R-HSA-428930.2	15	-1.6870322	0.017839687	0.04673054
DEREGULATED CDK5 TRIGGERS MULTIPLE NEURODEGENERATIVE PATHWAYS IN ALZHEIMER'S DISEASE MODELS%REACTOME DATABASE ID RELEASE 73%8862803	20	-1.6869017	0.011337869	0.0464887
G1 S-SPECIFIC TRANSCRIPTION%REACTOME DATABASE ID RELEASE 73%69205	22	-1.6813787	0.011178861	0.048297495
INSULIN RECEPTOR RECYCLING%REACTOME%R-HSA-77387.3	19	-1.6812835	0.013346515	0.048017554
C-TYPE LECTIN RECEPTORS (CLRS)%REACTOME%R-HSA-5621481.1	114	-1.68097	0.0	0.047832534
SEMAPHORIN INTERACTIONS%REACTOME DATABASE ID RELEASE 73%373755	48	-1.6795043	0.0034792693	0.04806923
PRESYNAPTIC FUNCTION OF KAINATE RECEPTORS%REACTOME%R-HSA-500657.1	13	-1.678592	0.020257387	0.04810844
G BETA:GAMMA SIGNALLING THROUGH BTK%REACTOME%R-HSA-8964315.1	11	-1.6759775	0.015714286	0.048889656
INTERLEUKIN-20 FAMILY SIGNALING%REACTOME%R-HSA-8854691.6	13	-1.675607	0.015068166	0.04872662
ANTIGEN ACTIVATES B CELL RECEPTOR (BCR) LEADING TO GENERATION OF SECOND MESSENGERS%REACTOME%R-HSA-983695.3	32	-1.6742347	0.0076440074	0.048958644
G BETA:GAMMA SIGNALLING THROUGH PLC BETA%REACTOME%R-HSA-418217.3	13	-1.6728406	0.02115019	0.049258515
PEPTIDE LIGAND-BINDING RECEPTORS%REACTOME DATABASE ID RELEASE 73%375276	53	-1.6679021	0.0026056746	0.050833337
KERATAN SULFATE KERATIN METABOLISM%REACTOME%R-HSA-1638074.1	19	-1.6648806	0.020352446	0.051742982
POST-CHAPERONIN TUBULIN FOLDING PATHWAY%REACTOME%R-HSA-389977.2	14	-1.6605417	0.016180437	0.05323132
CDT1 ASSOCIATION WITH THE CDC6:ORC:ORIGIN COMPLEX%REACTOME DATABASE ID RELEASE 73%68827	54	-1.655914	0.0037659327	0.05478004
HH MUTANTS ABROGATE LIGAND SECRETION%REACTOME DATABASE ID RELEASE 73%5387390	53	-1.6555331	0.004387248	0.054600015
SARS-COV INFECTIONS%REACTOME DATABASE ID RELEASE 73%9679506	80	-1.6537501	3.227889E-4	0.055042457
EXTRA-NUCLEAR ESTROGEN SIGNALING%REACTOME DATABASE ID RELEASE 73%9009391	50	-1.649607	0.0031736873	0.056500506
CALNEXIN CALRETICULIN CYCLE%REACTOME DATABASE ID RELEASE 73%901042	25	-1.6484724	0.015807204	0.05668803
FCERI MEDIATED CA+2 MOBILIZATION%REACTOME DATABASE ID RELEASE 73%2871809	28	-1.6472776	0.01039501	0.056910194
G BETA:GAMMA SIGNALLING THROUGH CDC42%REACTOME%R-HSA-8964616.1	13	-1.644208	0.02235723	0.057943195
INLB-MEDIATED ENTRY OF LISTERIA MONOCYTOGENES INTO HOST CELL%REACTOME DATABASE ID RELEASE 73%8875360	11	-1.6424502	0.024958795	0.058378357
RHO GTPASE EFFECTORS%REACTOME%R-HSA-195258.3	198	-1.6353528	0.0	0.061280478
NRIF SIGNALS CELL DEATH FROM THE NUCLEUS%REACTOME DATABASE ID RELEASE 73%205043	14	-1.635198	0.024216523	0.06100293
DECTIN-2 FAMILY%REACTOME DATABASE ID RELEASE 73%5621480	11	-1.6336858	0.022559961	0.06139147
COLLAGEN DEGRADATION%REACTOME%R-HSA-1442490.3	16	-1.6336035	0.023610428	0.061080292
G0 AND EARLY G1%REACTOME%R-HSA-1538133.3	24	-1.6323687	0.014762026	0.061283268
SIGNALING BY NOTCH4%REACTOME DATABASE ID RELEASE 73%9013694	73	-1.6313754	0.0035279025	0.061387904
MYOGENESIS%REACTOME%R-HSA-525793.2	17	-1.6307807	0.02424394	0.061309777
SIGNALING BY TGF-BETA RECEPTOR COMPLEX%REACTOME%R-HSA-170834.1	66	-1.6263587	0.004016064	0.06309195
VLDLR INTERNALISATION AND DEGRADATION%REACTOME%R-HSA-8866427.3	11	-1.6247277	0.027071178	0.06351568
SARS-COV-1 INFECTION%REACTOME DATABASE ID RELEASE 73%9678108	47	-1.6244625	0.008600918	0.06332168
CONSTITUTIVE SIGNALING BY NOTCH1 HD DOMAIN MUTANTS%REACTOME%R-HSA-2691232.1	11	-1.6216862	0.027666114	0.064258926
SIGNALING BY NOTCH1 HD DOMAIN MUTANTS IN CANCER%REACTOME DATABASE ID RELEASE 73%2691230	11	-1.6197977	0.025592862	0.06479726
SIGNALING BY HIGH-KINASE ACTIVITY BRAF MUTANTS%REACTOME%R-HSA-6802948.1	27	-1.6184255	0.015210106	0.06513682
CLEC7A (DECTIN-1) SIGNALING%REACTOME%R-HSA-5607764.1	93	-1.6182531	6.6666666E-4	0.064881764
CROSS-PRESENTATION OF SOLUBLE EXOGENOUS ANTIGENS (ENDOSOMES)%REACTOME%R-HSA-1236978.1	46	-1.6154683	0.005888951	0.0658937
SIGNALLING TO ERKS%REACTOME%R-HSA-187687.1	25	-1.6134334	0.020149833	0.0665015
REGULATION OF ORNITHINE DECARBOXYLASE (ODC)%REACTOME DATABASE ID RELEASE 73%350562	46	-1.6111732	0.0063254745	0.067294605
INTEGRIN SIGNALING%REACTOME%R-HSA-354192.2	19	-1.6073565	0.026440509	0.068790704
AUTOPHAGY%REACTOME%R-HSA-9612973.1	114	-1.6071914	0.0014414415	0.06852302
MAP2K AND MAPK ACTIVATION%REACTOME DATABASE ID RELEASE 73%5674135	30	-1.6063681	0.014423077	0.068575606
BUDDING AND MATURATION OF HIV VIRION%REACTOME DATABASE ID RELEASE 73%162588	26	-1.6061276	0.013989638	0.06834636
DEPOLYMERISATION OF THE NUCLEAR LAMINA%REACTOME%R-HSA-4419969.1	12	-1.6050022	0.028652616	0.06855273
RAB REGULATION OF TRAFFICKING%REACTOME%R-HSA-9007101.3	110	-1.6024641	7.2516315E-4	0.06947347
FRS2-MEDIATED ACTIVATION%REACTOME DATABASE ID RELEASE 73%170968	10	-1.6013697	0.034772463	0.06966853
PROGRAMMED CELL DEATH%REACTOME%R-HSA-5357801.2	152	-1.6013422	3.9793077E-4	0.06933442
SIGNALING BY RAF1 MUTANTS%REACTOME%R-HSA-9656223.1	29	-1.6010514	0.018322581	0.06912599
EPHA-MEDIATED GROWTH CONE COLLAPSE%REACTOME DATABASE ID RELEASE 73%3928663	11	-1.5992676	0.03214535	0.0696717
TRANSFERRIN ENDOCYTOSIS AND RECYCLING%REACTOME DATABASE ID RELEASE 73%917977	22	-1.5991026	0.020520521	0.06940935
P53-INDEPENDENT DNA DAMAGE RESPONSE%REACTOME DATABASE ID RELEASE 73%69610	48	-1.5990325	0.008951776	0.069102466
DEGRADATION OF THE EXTRACELLULAR MATRIX%REACTOME%R-HSA-1474228.4	48	-1.5968814	0.007787713	0.069786645
TGF-BETA RECEPTOR SIGNALING ACTIVATES SMADS%REACTOME DATABASE ID RELEASE 73%2173789	30	-1.596301	0.011777302	0.06973952
UBIQUITIN MEDIATED DEGRADATION OF PHOSPHORYLATED CDC25A%REACTOME%R-HSA-69601.3	48	-1.5962582	0.009596387	0.06942722
PLATELET SENSITIZATION BY LDL%REACTOME%R-HSA-432142.2	15	-1.5959752	0.030093735	0.06922083
SIGNALING BY NOTCH1%REACTOME DATABASE ID RELEASE 73%1980143	59	-1.5953764	0.006969697	0.06918307
ENERGY DEPENDENT REGULATION OF MTOR BY LKB1-AMPK%REACTOME%R-HSA-380972.1	27	-1.5950669	0.014080835	0.069000676
FCERI MEDIATED NF-KB ACTIVATION%REACTOME%R-HSA-2871837.2	79	-1.5941374	0.0026058631	0.069130026
APOPTOSIS%REACTOME%R-HSA-109581.3	149	-1.5941317	7.898894E-4	0.06880339
P53-INDEPENDENT G1 S DNA DAMAGE CHECKPOINT%REACTOME%R-HSA-69613.2	48	-1.5923619	0.009795448	0.0693435
MAPK TARGETS NUCLEAR EVENTS MEDIATED BY MAP KINASES%REACTOME%R-HSA-450282.1	29	-1.5919318	0.017956166	0.06922981
ONCOGENE INDUCED SENESCENCE%REACTOME DATABASE ID RELEASE 73%2559585	31	-1.5899862	0.012401056	0.069889456
ACTIVATION OF MATRIX METALLOPROTEINASES%REACTOME DATABASE ID RELEASE 73%1592389	11	-1.5880156	0.036949314	0.070599586
INTERLEUKIN-3, INTERLEUKIN-5 AND GM-CSF SIGNALING%REACTOME DATABASE ID RELEASE 73%512988	38	-1.5853748	0.010158014	0.07156336
EGFR DOWNREGULATION%REACTOME%R-HSA-182971.6	20	-1.5826076	0.02862883	0.07264744
SIGNALING BY NOTCH%REACTOME%R-HSA-157118.5	149	-1.5789713	3.8895372E-4	0.0741588
NUCLEOTIDE-BINDING DOMAIN, LEUCINE RICH REPEAT CONTAINING RECEPTOR (NLR) SIGNALING PATHWAYS%REACTOME%R-HSA-168643.1	50	-1.5782222	0.009795448	0.07421615
G ALPHA (12 13) SIGNALLING EVENTS%REACTOME%R-HSA-416482.4	53	-1.578124	0.0061637806	0.073925644
SIGNALING BY INSULIN RECEPTOR%REACTOME%R-HSA-74752.1	44	-1.5748135	0.010050251	0.074987434
RECYCLING PATHWAY OF L1%REACTOME%R-HSA-437239.1	22	-1.5739406	0.02608916	0.07476265
